# Supplementary material for: Future Warming from Global Food Consumption
Source: Research Square preprint supplement (doi:10.21203/rs.3.rs-1964969/v1), 2022-08-26
Supplement: Supplementary file 1 [file 4d7e75f301aff73233b17a1c.pdf]

1  
2  
3  
4  
5  
6  
7  
8  
9  
10  
11  
12  
13  
14  
15  
16  
17

*Supplementary Materials for*

**Future Warming from Global Food Consumption**

**Authors:** Catherine C. Ivanovich<sup>1,2</sup>, Tianyi Sun<sup>2</sup>, Doria R. Gordon<sup>2,3</sup> and Ilissa B. Ocko<sup>2</sup>

<sup>1</sup> Columbia University, Department of Earth and Environmental Sciences, New York, NY 10027

<sup>2</sup> Environmental Defense Fund, 1875 Connecticut Ave NW, Washington, DC 20009

<sup>3</sup> Department of Biology, University of Florida, Gainesville, FL 32611

1 **Supplemental Text**

2 ***Comparison of Annual Emissions Estimation to Published Literature***

3 The Fifth Assessment Report from the Intergovernmental Panel on Climate Change (IPCC AR5) estimates that in  
4 2010, fossil fuel CO<sub>2</sub> emissions from energy use on crop lands were approximately 400-600 MMt CO<sub>2</sub>/year<sup>1</sup>, while  
5 the IPCC Climate Change and Land report estimates that averaged over years 2007-2016, the yearly emission of  
6 CO<sub>2</sub> from land use change associated with the global food system is 4,900 +/- 2,500 MMt CO<sub>2</sub>/year<sup>2</sup>. Together this  
7 amounts to 5,400 +/- 2,600 MMt CO<sub>2</sub>/year from agriculture through both energy use and land use change.

8 FAOSTAT estimates emissions of 135 MMt CH<sub>4</sub> and 7 MMt N<sub>2</sub>O in 2010<sup>3</sup>, and the IPCC Climate Change and Land  
9 Summary for Policy Makers estimates that for the average period of 2007-2016, the annual emissions of CH<sub>4</sub> and  
10 N<sub>2</sub>O were 121 +/- 36 MMt and 7 +/- 2 MMt<sup>2</sup>. The UNEP and CCAC Global Methane Assessment (2021) estimates  
11 that agriculture is responsible for about 40% of the total annual CH<sub>4</sub> emissions of 350-380 MMt/yr, for a total of  
12 roughly 140-152 MMt/yr from agricultural sources<sup>4</sup>. Our individual greenhouse gas emissions estimates of 4,860  
13 MMt CO<sub>2</sub>, 150 MMt CH<sub>4</sub>, and 9 MMt N<sub>2</sub>O for year 2010 are in strong agreement with those previously published.

14  
15 When aggregated to total emissions in CO<sub>2</sub>e100 to compare to previous estimates of total greenhouse gas emissions  
16 from food consumption, we estimate 12,800 MMt of CO<sub>2</sub>e100 emissions attributed to food consumption for year  
17 2010. This is slightly below that estimated by Poore and Nemecek 2018 (13,700 MMt of CO<sub>2</sub>e100 for median year  
18 2010 food production rates)<sup>5</sup>, Crippa et. al 2021 (18,000 MMt of CO<sub>2</sub>e100 in year 2010)<sup>6</sup>, and Xu et al. 2021  
19 (17,300 MMt of CO<sub>2</sub>e100 for mean of the 2007-2013 period)<sup>7</sup> and falls within the bounds generated by Clark et al.  
20 2020 (9,250-13,300 MMt CO<sub>2</sub>e100/yr)<sup>8</sup> and Vermeulen et al. 2012 (9,800-16,900 MMt for year 2008; note that for  
21 proper comparison using IPCC AR4 estimates of global warming potentials, our estimates for aggregate total  
22 emissions in CO<sub>2</sub>e100 drop to 11,400 MMt)<sup>9</sup>. Ahmed et al. 2020 estimates that using a 20-year timeline global  
23 warming potential, this value is 19,100 MMt CO<sub>2</sub>e20/yr based on 2015 timelines<sup>10</sup>. Our estimate can be converted  
24 to 21,600 MMt CO<sub>2</sub>e20/yr for year 2010, higher on a shorter timeline compared to the contribution in CO<sub>2</sub>e100 due  
25 to the dominance of short-lived climate pollutants.

26

27

28

1 ***Comparison of Greenhouse Gas Emissions Intensity to Warming Intensity***

2 Previous analyses often rank food items by their greenhouse gas emissions intensity, but these evaluations almost  
3 always use the traditional CO<sub>2</sub>-equivalence metric with a 100-year time horizon, or do not consider the warming  
4 contribution of non-CO<sub>2</sub> greenhouse gases<sup>5,11,12</sup>. This could skew the relative importance of different food items as  
5 discussed in the main text. In order to test the importance of CO<sub>2</sub>e assessments in ranking food items, we calculate  
6 the relative contributions of each food group to future warming through year 2100 based on temperature change  
7 from the climate model, and compare end of century estimates in degrees Celsius to annual CO<sub>2</sub>e emissions with  
8 both 20- and 100-year time horizons. While the exact percent contribution depends slightly on which metric is  
9 selected, we find that the rank of each food group from highest to lowest contributor to warming in 2100 is  
10 comparable to the annual per capita contribution breakdowns when using CO<sub>2</sub>e on both 20- and 100-year time  
11 horizons (Figure S2). These ranks are also in strong agreement with those provided by previous literature<sup>7,13</sup>. This  
12 relationship suggests that the CO<sub>2</sub>e metric is a decent proxy for the relative importance of each food group in  
13 contributing to future warming. However, as previously discussed, CO<sub>2</sub>e neither quantifies the magnitude of  
14 temperature change attributed to emissions, nor accounts for the atmospheric build-up of continuous emissions over  
15 time.

## References for Supplemental Text

1. IPCC, 2013: Climate Change 2013: The Physical Science Basis. Contribution of Working Group I to the Fifth Assessment Report of the Intergovernmental Panel on Climate Change [Stocker, T.F., D. Qin, G.-K. Plattner, M. Tignor, S.K. Allen, J. Boschung, A. Nauels, Y. Xia, V. Bex and P.M. Midgley (eds.)]. Cambridge University Press, Cambridge, United Kingdom and New York, NY, USA, 1535 pp.
2. IPCC, 2019: Climate Change and Land: an IPCC special report on climate change, desertification, land degradation, sustainable land management, food security, and greenhouse gas fluxes in terrestrial ecosystems [P.R. Shukla, J. Skea, E. Calvo Buendia, V. Masson-Delmotte, H.-O. Pörtner, D. C. Roberts, P. Zhai, R. Slade, S. Connors, R. van Diemen, M. Ferrat, E. Haughey, S. Luz, S. Neogi, M. Pathak, J. Petzold, J. Portugal Pereira, P. Vyas, E. Huntley, K. Kissick, M. Belkacemi, J. Malley, (eds.)]. In press.
3. Food and Agriculture Organization, 2019. FAOSTAT, Rome, Italy.
4. United Nations Environment Programme and Climate and Clean Air Coalition, 2021. Global Methane Assessment: Benefits and Costs of Mitigating Methane Emissions. Nairobi: United Nations Environment Programme.
5. Poore, J. and T. Nemecek, 2018. Reducing food's environmental impacts through producers and consumers, *Science*, 360 (6392), 987-992. <https://doi.org/10.1126/science.aag0216>
6. Crippa, M., Solazzo, E., Guizzardi, D., Monforti-Ferrario, F., Tubiello, F. N., and Leip, A., 2021. Food systems are responsible for a third of global anthropogenic GHG emissions, *Nature Food*, 2, 198-209. <https://doi.org/10.1038/s43016-021-00225-9>
7. Xu, X., Sharma, P., Shu, S., Lin, T., Ciais, P., Tubiello, F. N., Smith, P., Campbell, N., and Jain, A. K., 2021. Global greenhouse gas emissions from animal-based foods are twice those of plant-based foods, *Nature Food*, 2, 724-732. <https://doi-org/10.1038/s43016-021-00358-x>
8. Clark, M., A., Domingo, N. G. G., Colgan, K., Thakrar, S. K., Tilman, D., Lynch, J., Azevedo, I. L., and Hill, J. D., 2020. Global food system emissions could preclude achieving the 1.5° and 2°C climate change targets, *Science*, 370(6517), 705-708. <https://doi.org/10.1126/science.aba7357>
9. Vermeulen, S. J., Campbell, B. M., Ingram, J. S. I., 2012. Climate change and food systems, *Annu. Rev. Environ. Resour.*, 37, 195-222. <https://doi.org/10.1146/annurev-environ-020411-130608>
10. Ahmed, J., Almeida, E., Aminetzah, D., Denis, N., Henderson, K., Katz, J., Kitchel, H., and Mannion, P., 2020. Agriculture and climate change: Reducing emissions through improved farming practices, McKinsey & Company.
11. Searchinger, T., Waite, R., Hanson, C., Ranganathan, J., Dumas, P., and E. Matthews, 2018. Creating a Sustainable Food Future, World Resources Institute, Washington, DC.
12. Delgado, C. L., 2003. Rising consumption of meat and milk in developing countries has created a new food revolution. *J. Nutr.*, 133(11), 3907-3910. <https://doi.org/10.1093/jn/133.11.3907S>
13. Heller, M. C. & Keoleian, G. A., 2015. Greenhouse gas emission estimates of U.S. Dietary Choices and Food Loss, *J. Ind. Ecol.*, 391-401. <https://doi.org/10.1111/jiec.12174>

## 1   **References for Emissions Database Literature Review**

- 2       1. Aguilera, E., Guzman, G., and Alonso, A., 2015. Greenhouse gas emissions from conventional and organic  
3       cropping systems in Spain. I. Herbaceous crops, *Agron. Sustain. Dev.*, 35, 713-724,  
4       <https://doi.org/10.1007/s13593-014-0267-9>.
- 5       2. Alemu, A. W., Ominski, K. H., Tenuta, M., et al. 2016. Evaluation of greenhouse gas emissions from HOG  
6       manure application in a Canadian cow-calf production system using whole-farm models, *Animal Production*  
7       *Science*, 56(10), pp. 16, DOI 10.1071/AN14994.
- 8       3. Arunrat, N. and Pumijumnong N., 2017. Practices for reducing greenhouse gas emissions from rice  
9       production in Northeast Thailand, *Agriculture*, 7(1), 4, doi:10.3390/agriculture7010004.
- 10      4. Aryal, J. P., Sapkota, T. B., Jat, M. L., and Bishnoi, D. K., 2015. On-farm economic and environmental  
11      impact of zero-tillage wheat: A case of North-West India, *Expl. Agric.*, 51(1), pp. 1-16,  
12      doi:10.1017/S001447971400012X
- 13      5. Astier, M., Merlin-Urbe, Y., Villamil-Echeverri, L., Garciarreal, A., Gavito, M. E., and Masera, O. R., 2014.  
14      Energy balance and greenhouse gas emissions in organic and conventional avocado orchards in Mexico,  
15      *Ecological Indicators*, 43, 281-287, <https://doi.org/10.1016/j.ecolind.2014.03.002>.
- 16      6. Astuti, R. S. D. and Hadiyanto, H., 2018. Estimating environmental impact potential of small scale fish  
17      processing using life cycle assessment, *Journal of Ecological Engineering*, 19(6), 65-74,  
18      <https://doi.org/10.12911/22998993/91879>
- 19      7. Bartl, K., Verones, F., and Hellweg, S., 2012. Life cycle assessment based evaluation of regional impacts  
20      from agricultural production at the Peruvian coast, *Environmental Science and Technology*, 46, 9872-9880,  
21      <dx.doi.org/10.1021/es301644y>
- 22      8. Basarab, J., Baron, V., Lopez-Campos, O., Aalhus, J., Haugen-Kozyra, K., and Okine, E., 2012.  
23      Greenhouse gas emissions from calf- and yearling-fed beef production systems, with and without the use of  
24      growth promotants, *Animals*, 2, 195-220, doi:10.3390/ani2020195.
- 25      9. Bava, L., Zucali, M., Sandrucci, A., and Tamburini, A., 2015. Environmental impact of the typical heavy pig  
26      production in Italy, *Journal of Cleaner Production*, 140(2), 685-691,  
27      <https://doi.org/10.1016/j.jclepro.2015.11.029>.
- 28      10. Biswas, W. K., Barton, L., and Carter, D., 2008. Global warming potential of wheat production in Western  
29      Australia: A life cycle assessment, *Water and Environment Journal*, 22(3), 206-216, doi:10.1111/j.1747-  
30      6593.2008.00127.x
- 31      11. Boissy, J., Aubin, J., Drissi, A., van der Werf, H. M. G., Bell, G. J., and Kaushik, S. J., 2011. Environmental  
32      impacts of plant-based salmonid diets at feed and farm scales, *Aquaculture*, 321, 61-70,  
33      <https://doi.org/10.1016/j.aquaculture.2011.08.033>
- 34      12. Bos, J. F. F. P., de Haan, J., Sukkel, W., and Schils, R. L. M., 2014. Energy use and greenhouse gas emissions  
35      in organic and conventional farming systems in the Netherlands, *Wageningen Journal of Life Sciences*, 68,  
36      61-70, <https://doi.org/10.1016/j.njas.2013.12.003>
- 37      13. Brodt, S., Kendall, A., Mohammadi, Y., Arslan, A., Yuan, J., Lee, I., and Linqvist, B., Life cycle greenhouse  
38      gas emissions in California rice production, *Field Crops Research*, 169, 89-98,  
39      <http://dx.doi.org/10.1016/j.fcr.2014.09.007>
- 40      14. Buchspies, B., Tölle, S. J., and Jungbluth, N., 2011. Life Cycle Assessment of high-sea fish and salmon  
41      aquaculture, ESU-services Ltd., Schaffhausen, Switzerland.
- 42      15. Cardoso, A. S., Berndt, A., Leytem, A., Alves, B. J. R., de Carvalho, I. D. N. O., de Barros Soares, L. H.,  
43      Urquiaga, S., and Boddey, R. M., 2016. Impact of the intensification of beef production in Brazil on  
44      greenhouse gas emissions and land use, *Agricultural Systems*, 143, 86-96,  
45      <http://dx.doi.org/10.1016/j.agsy.2015.12.007>
- 46      16. Castanheira, E. G. and Freire, F., 2013. Greenhouse gas assessment of soybean production: Implications of  
47      land use change and different cultivation systems, *Journal of Cleaner Production*, 54, 49-60,  
48      <https://doi.org/10.1016/j.jclepro.2013.05.026>.
- 49      17. Castanheira, E. G., Acevedo, H., and Freire, F., 2014. Greenhouse gas intensity of palm oil produced in  
50      Colombia addressing alternative land use change and fertilization scenarios. *Applied Energy*, 114, 958-967,  
51      <http://dx.doi.org/10.1016/j.apenergy.2013.09.010>

- 1 18. Cederberg, C. and Flysjo, A., 2004. Life cycle inventory of 23 dairy farms in South-Western Sweden,  
2 Swedish Institute for Food and Biotechnology, [https://www.semanticscholar.org/paper/Life-Cycle-Inventory-of-23-Dairy-Farms-in-Sweden-Cederberg-Flysj%  
3 Flysj%C3%B6/85fee19ea1f8265f28e37bb061e83c3f682138d9](https://www.semanticscholar.org/paper/Life-Cycle-Inventory-of-23-Dairy-Farms-in-Sweden-Cederberg-Flysj%C3%B6/85fee19ea1f8265f28e37bb061e83c3f682138d9)  
4
- 5 19. Cederberg, C., Meyer, D., and Flysjo, A., 2009. Life cycle inventory of greenhouse gas emissions and use of  
6 land and energy in Brazilian beef production, Swedish Institute for Food and Biotechnology.  
7 [https://pure.au.dk/portal/en/publications/life-cycle-inventory-of-greenhouse-gas-emissions-and-use-of-  
8 land-and-energy-in-brazilian-beef-production\(fbed51d0-74f4-11de-bac6-000ea68e967b\).html](https://pure.au.dk/portal/en/publications/life-cycle-inventory-of-greenhouse-gas-emissions-and-use-of-land-and-energy-in-brazilian-beef-production(fbed51d0-74f4-11de-bac6-000ea68e967b).html)
- 9 20. Cederberg, C., Persson, M. U., Neovius, K., Molander, S., and Clift, R., 2011. Including carbon emissions  
10 from deforestation in the carbon footprint of Brazilian Beef, *Environmental Science & Technology*, 45(5),  
11 1773-1779, DOI: 10.1021/es103240z.
- 12 21. Cerutti, A. K., Bruun, S., Donno, D., Beccaro, G. L., and Bounous, G., 2013. Environmental sustainability  
13 of traditional foods: The case of ancient apple cultivars in Northern Italy assessed by multifunctional LCA,  
14 *Journal of Cleaner Production*, 52, 245-252, <http://dx.doi.org/10.1016/j.jclepro.2013.03.029>
- 15 22. Cherubini, E., Zanghelini, G. M., Alvarenga, R. A. F., Franco, D., and Soares, S. R., 2015. Life cycle  
16 assessment of swine production in Brazil: a comparison of for manure management systems, *Journal of*  
17 *Cleaner Production*, 87, 68-77, <http://doi.org/10.1016/j.jclepro.2014.10.035>
- 18 23. Christoforou, E., Fokaides, P. A., Koroneos, C. J., and Recchia, L., 2016. Life Cycle Assessment of first  
19 generation energy crops in arid isolated island states: the case of Cyprus, *Sustainable Energy Technologies*  
20 *and Assessments*, 14, 1-8, <http://dx.doi.org/10.1016/j.seta.2016.01.005>
- 21 24. Cunha, C. S., Lopes, N. L., Veloso, C. M., Jacovine, L. A. G., Tomich, T. R. Pereira, L. G. R., and Marcondes,  
22 M. I., 2016. Greenhouse gases inventory and carbon balance of two dairy systems obtained from two  
23 methane-estimation methods, *Science of the Total Environment*, 571, 744-754,  
24 <https://doi.org/10.1016/j.scitotenv.2016.07.046>
- 25 25. de Figueiredo, M. C. B., Kroeze, C., Potting, J., Barros, V. D. S., de Aragao, F. A. S., Gondim, R. S., Santos,  
26 T. D. L., de Boer, I. J. M. D., 2013. The carbon footprint of exported Brazilian yellow melon. *Journal of*  
27 *Cleaner Production*, 47, 404-414, <https://doi.org/10.1016/j.jclepro.2012.09.015>
- 28 26. de Figueiredo, M. C. B., Potting, J., Lopez, S. L. A., and Bezerra, M., 2015. Environmental assessment of  
29 tropical perennial crops: The case of the Brazilian cashew, *Journal of Cleaner Production*, 112, 131-140,  
30 <http://dx.doi.org/10.1016/j.jclepro.2015.05.134>
- 31 27. Dekker, S. E. M., de Boer, I. J. M., Aarnink, A. J. A., and Groot Koerkamp, P. W. G., 2008. Environmental  
32 hotspot identification of organic egg production, 6<sup>th</sup> International Conference on Life Cycle Assessment in  
33 the Agri-Food Sector, retrieved from: <http://library.wur.nl/WebQuery/wurpubs/371129>.
- 34 28. Dekker, S. E. M., de Boer, I. J. M., Vermeij, I., Aarnink, A. J. A., and Groot Koerkamp, P. W. G., 2011.  
35 Ecological and economic evaluation of Dutch egg production systems, *Livestock Science*, 139, 109-121,  
36 <http://dx.doi.org/10.1016/j.livsci.2011.03.011>
- 37 29. Dolman, M. A., Vrolijk, H. C. J., and de Boer, I. M. J., 2012. Exploring variation in economic, environmental,  
38 and societal performance among Dutch fattening pig farms, *Livestock Science*, 149, 143-154,  
39 <http://dx.doi.org/10.1016/j.livsci.2012.07.008>
- 40 30. Fallahpour, F., Aminghafouri, A., Behbahani, A. G., and Bannayan, M., 2012. The environmental impact  
41 assessment of wheat and barley production by using life cycle assessment (LCA) methodology, *Environ.*  
42 *Dev. Sustain.*, 14, 979-992, DOI 10.1007/s10668-012-9367-3
- 43 31. Fantin, V., Buttol, P., Pergreffi, R., and Masoni, P., 2012. Life cycle assessment of Italian high quality milk  
44 production. A comparison with an EPD study, *Journal of Cleaner Production*, 28, 150-159,  
45 <http://dx.doi.org/10.1016/j.jclepro.2011.10.017>
- 46 32. Flysjo, A., Henriksson, M., Cederberg, C., Ledgard, S., and Englund, J. E., 2011. The impact of various  
47 parameters on the carbon footprint of milk production in New Zealand and Sweden, *Agricultural Systems*,  
48 104, 459-469, <http://dx.doi.org/10.1016/j.agsy.2011.03.003>.
- 49 33. Fusi, A., Guidetti, R., and Benedetto, G., 2014. Delving into the environmental aspect of a Sardinian white  
50 wine: From partial to total life cycle assessment, *Science of the Total Environment*, 472, 989-1000,  
51 <http://dx.doi.org/10.1016/j.scitotenv.2013.11.148>

- 1 34. García, B. G., Jiménez, C. R., Aguado-Giménez, F., and García, J. G., 2016. Life Cycle Assessment of  
2 gilthead seabream (*Sparus aurata*) production in offshore fish farms, *Sustainability*, 8, pp.19,  
3 <https://doi.org/10.3390/su8121228>
- 4 35. García, B. G., Jiménez, C. R., Aguado-Giménez, F., and García, J. G., 2019. Life Cycle Assessment of  
5 seabass (*Dicentrarchus labrax*) production in offshore fish farms: Variability and multiple regression  
6 analysis, *Sustainability*, 11, pp. 21, <https://doi.org/10.3390/su11133523>
- 7 36. Geough, E. J. M., Little, S. M., Janzen, H. H., McAllister, T. A., McGinn, S. M., and Beauchemin, K. A.,  
8 2012. Life-cycle assessment of greenhouse gas emissions from dairy production in Eastern Canada: A case  
9 study, *J. Dairy Sci.*, 95, 5164-5175, <http://dx.doi.org/10.3168/jds.2011-5229>
- 10 37. Gonzales-García, S., Belo, S., Dias, A. C., Rodrigues, J. V., da Costa, R. R., Ferreira, A., de Andrade, L. P.,  
11 and Arroja, L., 2015. Life cycle assessment of pigmeat production: Portuguese case study and proposal of  
12 improvement options, *Journal of Cleaner Production*, 100, 126-139,  
13 <http://dx.doi.org/10.1016/j.jclepro.2015.03.048>
- 14 38. Grassini, P. and Cassman, K. G., 2011. High-yield maize with large net energy yield and small global  
15 warming intensity, *PNAS*, 109(4), 1074-1079, <http://www.pnas.org/cgi/doi/10.1073/pnas.1116364109>
- 16 39. Grootenroos, J., Seppälä, J., Silvenius, F., and Mäkinen, T., 2006. Life cycle assessment of Finnish cultivated  
17 rainbow trout, *Boreal Environment Research*, 11, 401-414.
- 18 40. Guerci, M., Luciana, B., Zucali, M., and Anna, S., 2013. Effect of farming strategies on environmental impact  
19 of intensive dairy farms in Italy, *Journal of Dairy Research*, 80, 300-308, doi:10.1017/S0022029913000277
- 20 41. Gutierrez, A. S., Eras, J. J. C., Billen, P., and Vandecasteele, C., 2016. Environmental assessment of pig  
21 production in Cienfuegos, Cuba: Alternatives for manure management, *Journal of Cleaner Production*, 112,  
22 2518-2528, <http://dx.doi.org/10.1016/j.jclepro.2015.09.082>
- 23 42. Harada, H., Kobayashi, H., and Shindo, H., 2007. Reduction in greenhouse gas emissions by no-tilling rice  
24 cultivation in Hachirogata polder, northern Japan: Life-cycle inventory analysis, *Soil Science and Plant  
25 Nutrition*, 53, 668-677, doi: 10.1111/j.1747-0765.2007.00174.x
- 26 43. He, X., Qiao, Y., Liu, Y., Dendler, L., Yin, C., and Martin, F., 2016. Environmental impact assessment of  
27 organic and conventional tomato production in urban greenhouses of Beijing city, China, *Journal of Cleaner  
28 Production*, 134(A), 251-258, <https://doi.org/10.1016/j.jclepro.2015.12.004>
- 29 44. Hokazono, S., Hayashi, K., and Sato, M., 2009. Potentialities of organic and sustainable rice production in  
30 Japan from a life cycle perspective, *Agronomy Research*, 7(Special Issue 1), 257-262.
- 31 45. Iribarren, D., Moreira, M., and Feijoo, G., 2010. Implementing by-product management into the Life Cycle  
32 Assessment of the mussel sector, *Resources Conservation and Recycling*, 54, 1219-1230,  
33 <https://doi.org/10.1016/j.resconrec.2010.03.017>
- 34 46. Jayasundara, S. and Wagner-Riddle, C., 2013. Greenhouse gas emissions intensity of Ontario milk  
35 production in 2011 compared with 1991, *Can. J. Anim., Sci.*, 94, 155-173, doi:10.4141/CJAS2013-127
- 36 47. Kehagias, M. C., Michos, M. C., Menexes, G. C., Mamolos, A. P., Tsatsarelis, C. A., Anagnostopoulos, C.  
37 D., and Kalburtji, K. L., 2015. Energy equilibrium and carbon dioxide, methane, and nitrous oxide-emissions  
38 in organic, integrated and conventional apple orchards related to Natura 2000 site, *Journal of Cleaner  
39 Production*, 91, 89-95, <http://dx.doi.org/10.1016/j.jclepro.2014.12.007>
- 40 48. Keyes, S., Tyedmers, P., and Beazley, K., 2015. Evaluating the environmental impacts of conventional and  
41 organic apple production in Nova Scotia, Canada, through life cycle assessment, *Journal of Cleaner  
42 Production*, 104, 40-51, <https://doi.org/10.1016/j.jclepro.2015.05.037>
- 43 49. Khoshnevisan, B., Rafiee, S., Omid, M., Mousazadeh, H., and Clark, S., 2014. Environmental impact  
44 assessment of tomato and cucumber cultivation in greenhouses using life cycle assessment and adaptive  
45 neuro-fuzzy inference system, *Journal of Cleaner Production*, 73, 183-192,  
46 <http://dx.doi.org/10.1016/j.jclepro.2013.09.057>
- 47 50. Koga, N., Sawamoto, T., and Tsuruta, H., 2006. Life cycle inventory-based analysis of greenhouse gas  
48 emissions from arable land farming systems in Hokkaido, northern Japan, *Soil Science and Plant Nutrition*,  
49 52(4), 564-574, DOI: 10.1111/j.1747-0765.2006.00072.x
- 50 51. A. Korsæth, Jacobsen, A. Z., Roer, A.-G., Henriksen, T. M., Sonesson, U., Bonesmo, H., Skjelvåg, A. O.,  
51 and Strømman, A. H. 2012. Environmental life cycle assessment of cereal and bread production in Norway,

1 Acta Agriculturae Scandinavica, Section A – Animal Science, 62(4), 242-253, DOI:  
2 10.1080/09064702.2013.783619

- 3 52. Kramer, K. J., Moll, H. C., Nonhebel, S., and Wilting, H. C., 1999. Greenhouse gas emissions related to  
4 Dutch food consumption. *Energy Policy*, 27(4), 203-216, [https://doi.org/10.1016/S0301-4215\(99\)00014-2](https://doi.org/10.1016/S0301-4215(99)00014-2)
- 5 53. Lillywhite, R., Chandler, D., Grant, W., Lewis, K., Firth, C., Schmutz, U., and Halpin, D., 2007.  
6 Environmental footprint and sustainability of horticulture (including potatoes) – a comparison with other  
7 agricultural sectors, Warwick HRI, University of Warwick, pp. 159.
- 8 54. Litskas, V. D., Mamolos, A. P., Kalburtji, K. L., Tsatsarelis, C. A., and Kiose-Kampasakali, E., 2011. Energy  
9 flow and greenhouse gas emissions in organic and conventional sweet cherry orchards located in or close to  
10 Natura 2000 sites, *Biomass and Bioenergy*, 35, 1302-1310,  
11 <http://dx.doi.org/10.1016/j.biombioe.2010.12.023>
- 12 55. Martin-Gorriz, B., Soto-Garcia, M., and Martin-Alvarez, V., 2014. Energy and greenhouse-gas in agriculture  
13 of SE (southeast) Spain. Effects of alternative water supply scenarios, *Energy*, 77, 478-488,  
14 <http://dx.doi.org/10.1016/j.energy.2014.09.031>
- 15 56. Mashoko, L., Mbohwa, C., and Thomas, V. M., 2010. LCA of the South African sugar industry, *Journal of*  
16 *Environmental Planning and Management*, 53(6), 793-807, <https://doi.org/10.1080/09640568.2010.488120>
- 17 57. Mathot, M., Van Stappen, F., Loriers, A., Planchon, V., Jamin, J., Corson, M., and Stilmant, D., 2014.  
18 Environmental impacts of milk production in southern Belgium: Estimation for nine commercial farms and  
19 investigation of mitigation via better manure management, *Proceedings of the 9<sup>th</sup> International Conference*  
20 *on Life Cycle Assessment in the Agri-Food Sector*, 772-781, 8-10 October 2014, San Francisco, USA.
- 21 58. Mazzetto, A. M., Feigl, B. J., Schils, R. L. M., Cerri, C. E. P., and Cerri, C. C., 2015. Improved pasture and  
22 herd management to reduce greenhouse gas emissions from a Brazilian beef production system, *Livestock*  
23 *Science*, 175, 101-112, <http://dx.doi.org/10.1016/j.livsci.2015.02.014>
- 24 59. Michos, M. C., Mamolos, A. P., Menexes, G. C., Tsatsarelis, C. A., Tsirakoglou, V. M., and Kalburtji, K. L.,  
25 2012. Energy inputs, outputs, and greenhouse gas emissions in organic, integrated and conventional peach  
26 orchards, *Ecological Indicators*, 13, 22-28, doi:10.1016/j.ecolind.2011.05.002
- 27 60. Mohammadi, A., Rafiee, S., Jafari, A., Dalgaard, T., Knudsen, M., T., Keyhani, A., Mousavi-Avval, S. H.,  
28 and Hermansen, J. E., 2013. Potential greenhouse gas emission reductions in soybean farming: a combined  
29 use of Life Cycle Assessment and Data Envelopment Analysis, *Journal of Cleaner Production*, 54, 89-100,  
30 <http://dx.doi.org/10.1016/j.jclepro.2013.05.019>
- 31 61. Taufiq, M., Padmi, T., and Rahardyan, D. B., 2016. Life cycle assessment of dairy farms, *Reviews on*  
32 *Environmental Health*, 31(1), 187-190, <https://doi.org/10.1515/reveh-2015-0037>
- 33 62. Murphy, C. W. and Kendall, A., 2013. Life cycle inventory development for corn and stover production  
34 systems under different allocation methods, *Biomass and Bioenergy*, 58, 67-75,  
35 <http://dx.doi.org/10.1016/j.biombioe.2013.08.008>
- 36 63. Nemecek, T., Weiler, K., Plassmann, K., and Schnetzer, J., 2011. Geographical extrapolation of  
37 environmental impact of crops by the MEXALCA method, Agroscope Reckenholz-Tanikon Research Station  
38 ART, Zurich, Switzerland.
- 39 64. Nikkhah, A., 2017. Life cycle assessment of the agriculture sector in Iran (2007-2014), *Sustainability*, 37(5),  
40 1750-1757, <https://doi.org/10.1002/ep.12831>
- 41 65. Nilsson, K., Flysjo, A., Davis, J., Sim, S., Unger, N., and Bell, S., 2010. Comparative life cycle assessment  
42 of margarine and butter consumed in the UK, Germany, and France, *The International Journal of Life Cycle*  
43 *Assessment*, 15(9), 916-926, <https://doi.org/10.1007/s11367-010-0220-3>
- 44 66. Noponen, M. R. A., Edwards-Jones, G., Hagggar, J. P., Soto, G., Attarzadeh, N., and Healey, J. R., 2012.  
45 Greenhouse gas emissions in coffee grown with differing input levels under conventional and organic  
46 management, *Agriculture, Ecosystems, and Environment*, 151, 6-15,  
47 <https://doi.org/10.1016/j.agee.2012.01.019>
- 48 67. Norton, T. 2008. Enhancing environmental sustainability in the processing potato industry, *Horticulture*  
49 *Australia Ltd*, Sydney, Australia.
- 50 68. Oelbermann, M., 2014. Sustainable agroecosystems in climate change mitigation, Wageningen Academic  
51 Publishers, Wageningen, The Netherlands.

- 1 69. O'Brien, D., Shalloo, L., Patton, J., Buckley, F., Grainger, C., and Wallace, M., 2012. A life cycle  
2 assessment of seasonal grass-based and confinement dairy farms, *Agricultural Systems*, 107, 33-46,  
3 doi:10.1016/j.agsy.2011.11.004
- 4 70. O'Brien, D., Capper, J. L., Garnsworthy, P. C., Grainger, C., and Shalloo, L., 2014. A case study of the  
5 carbon footprint of milk from high-performing confinement and grass-based dairy farms, *J. Dairy Sci.*, 97(3),  
6 1835-1851, <http://dx.doi.org/10.3168/jds.2013-7174>
- 7 71. Pathak, H., Sankhyan, S., Dubey, D. S., Bhatia, A., and Jain, N., 2012. Dry direct-seeding of rice for  
8 mitigation greenhouse gas emission: field experimentation and simulation, *Paddy Water Environ.*, DOI  
9 10.1007/s10333-012-0352-0
- 10 72. Penati, C. A., Tamburini, A., Bava, L., Zucali, M., and Sandrucci, A., 2016. Environmental impact of cow  
11 milk production in the Central Italian Alps using life cycle assessment, *Italian Journal of Animal Science*,  
12 12(96), 584-592, <https://doi.org/10.4081/ijas.2013.e96>
- 13 73. Phetteplace, H. W., Johnson, D. E., and Seidl, A. F., 2001. Greenhouse gas emissions from simulated beef  
14 and dairy livestock systems in the United States, *Nutrient Cycling in Agroecosystems*, 60, 99-102,  
15 <https://doi.org/10.1023/A:1012657230589>
- 16 74. Pratibha, G., Srinivas, I., Rao, K. V., Raju, B. M. K., Thyagaraj, C. R., et al. 2015. Impact of conservation  
17 agriculture practices on energy use efficiency and global warming potential in rainfed pigeonpea-castor  
18 systems, *Europ. J. Agronomy*, 66, 30-40, <http://dx.doi.org/10.1016/j.eja.2015.02.001>.
- 19 75. Prudencio de Silva, V., van der Werf, H. M. G., Soares, S. R., and Corson, M., 2014. Environmental impacts  
20 of French and Brazilian Broiler chicken production scenarios: An LCA approach, *J. Environ. Manage.*, 15,  
21 222-231, doi: 10.1016/j.jenvman.2013.12.011
- 22 76. Ramjeawon, T., 2004. Life cycle assessment of cane-sugar on the island of Mauritius, *Int. J. LCA*, 9(4), 254-  
23 260, <http://dx.doi.org/10.1065/lca2004.03.151>
- 24 77. Ridoutt, B. G., Sanguansri, P., and Harper, G. S., 2011. Comparing carbon and water footprints for beef cattle  
25 production in Southern Australia, *Sustainability*, 3, 2443-2455, doi:10.3390/su3122443
- 26 78. Rinaldi, S., Barbanera, M., and Lascaro, E., 2014. Assessment of carbon footprint and energy performance  
27 of the extra virgin olive oil chain in Umbria, Italy, *Science of the Total Environment*, 482-483, 71-79,  
28 <http://dx.doi.org/10.1016/j.scitotenv.2014.02.104>
- 29 79. Rivas-Garcia, P., Botello-Alvarez, J. E., Seabra, J. E. A., da Silva Walter, A. C., and Estrada-Baltazar, A.,  
30 2015. Environmental implications of anaerobic digestion for manure management in dairy farms in Mexico:  
31 a life cycle perspective, *Environmental Technology*, 36(17), 1-38, DOI: 10.1080/09593330.2015.1024758
- 32 80. Rosa, D., Figueiredo, F., Castanheira, E. G., and Freire, F., 2017. Life-cycle assessment of fresh and frozen  
33 chestnut, *Journal of Cleaner Production*, 140, 742-752, <http://dx.doi.org/10.1016/j.jclepro.2016.04.064>
- 34 81. Samson, R., 2012. Environmental and Socioeconomic Life Cycle Assessment of Canadian Milk, Quantis  
35 Canada, AGECO, and CIRAIG for Dairy Farmers of Canada.
- 36 82. Sandrucci, A., Bava, L., Zucali, M., Guerci, M., and Tamburini, A., 2014. How can farming intensification  
37 affect the environmental impact of milk production? *J. Dairy Sci.*, 97, 4579-4593, <http://dx.doi.org/10.3168/jds.2013-7530>
- 38 83. Sasu-Boakye, Y., Cederberg, C., and Wirsenius, S., 2014. Localising livestock protein feed production and  
39 the impact on land use and greenhouse gas emissions, *Animal*, 8(8), 1339-1348,  
40 doi:10.1017/S1751731114001293
- 41 84. Saunders, C. and Barber, A., 2007. Comparative energy and greenhouse gas emissions of New Zealand's and  
42 the UK's dairy industry, Lincoln University Research Report No. 297, Lincoln, New Zealand.
- 43 85. Schmidt, J. H., 2007. Life cycle assessment of rapeseed oil and palm oil, Department of Development and  
44 Planning Aalborg University Ph.D. Thesis, pp. 277, retrieved from:  
45 <https://core.ac.uk/download/pdf/60370684.pdf>
- 46 86. Segura, M. and Andrade, H. J., 2012. Huella de carbono en cadenas productivas de café con diferentes  
47 estándares de certificación en Costa Rica, *Luna Azul*, 35, 60-77.
- 48 87. Shin, R. and Searcy, C., 2018. Evaluating the greenhouse gas emissions in the craft beer industry: An  
49 assessment of challenges and benefits of greenhouse gas accounting, *Sustainability*, 10, pp. 30,  
50 <https://doi.org/10.3390/su10114191>
- 51

- 1 88. Soltani, A., Rajabi, M. H., Zeinali, E., and Soltani, E., 2013. Energy inputs and greenhouse gases emissions  
2 in wheat production in Gorgan, Iran, *Energy*, 50, 54-61, <http://dx.doi.org/10.1016/j.energy.2012.12.022>
- 3 89. Soni, P., Taewichit, C., and Salokhe, V. M., 2013. Energy consumption and CO2 emissions in rainfed  
4 agricultural production systems of Northeast Thailand, *Agricultural Systems*, 116, 25-36,  
5 <http://dx.doi.org/10.1016/j.agsy.2012.12.006>
- 6 90. Steinfeld, H., Gerber, P., Wassenaar, T., Castel, V., Rosales, M., and de Haan, C., 2006. *Livestock's Long  
7 Shadow*, Food and Agriculture Organization, Rome, Italy, pp. 390.
- 8 91. Stichnothe, H. and Schuchardt, F., 2011. Life cycle assessment of two palm oil production systems, *Biomass  
9 and Bioenergy*, 35, 3976-3984, <http://dx.doi.org/10.1016/j.biombioe.2011.06.001>
- 10 92. Svanes, E. and Aronsson, A. K. S., 2013. Carbon footprint of a Cavendish banana supply chain, *The  
11 International Journal of Life Cycle Assessment*, 18(8), 1450-1464, <https://doi.org/10.1007/s11367-013-0602-4>
- 12 4
- 13 93. Thomassen, M. A., van Calster, K. J., Smits, M. C. J., Iepema, G. L., and de Boer, I. J. M., 2008. Life cycle  
14 assessment of conventional and organic milk production in the Netherlands, *Agricultural Systems*, 96, 95-  
15 107, doi:10.1016/j.agsy.2007.06.001
- 16 94. Tidaker, P., Mattsson, B., and Jonsson, H., 2007. Environmental impact of wheat production using human  
17 urine and mineral fertilisers – a scenario study, *Journal of Cleaner Production*, 15, 52-62,  
18 doi:10.1016/j.jclepro.2005.04.019
- 19 95. Van der Werf, H. M. G., Kanyarushoki, C., and Corson, M. S., 2009. An operational method for the  
20 evaluation of resource use and environmental impacts of dairy farms by life cycle assessment, *Journal of  
21 Environmental Management*, 90, 3643-3652, doi:10.1016/j.jenvman.2009.07.003
- 22 96. Vazquez-Rowe, I., Villanueva-Rey, P., Moreira, M. T., and Feijoo, G., 2012. Environmental analysis of  
23 Ribeiro wine from a timeline perspective: Harvest year matters when reporting environmental impacts,  
24 *Journal of Environmental Management*, 98, 73-83, doi:10.1016/j.jenvman.2011.12.009
- 25 97. Vegnoni, E., Franca, A., Breedveld, L., Porqueddu, C., Ferrara, R., and Duce, P., 2015. Environmental  
26 performances of Sardinian dairy sheep production systems at different input levels, *Science of the Total  
27 Environment*, 502, 354-361, <http://dx.doi.org/10.1016/j.scitotenv.2014.09.020>
- 28 98. Verge, X. P. C., Dyer, J. A., Desjardins, R. L., and Worth, D., 2008. Greenhouse gas emissions from the  
29 Canadian beef industry, *Agricultural Systems*, 98, 126-134, doi:10.1016/j.agsy.2008.05.003
- 30 99. Verge, X. P. C., Dyer, J. A., Desjardins, R. L., and Worth, D., 2009. Greenhouse gas emissions from the  
31 Canadian pork industry, *Livestock Science*, 121, 92-101, <http://dx.doi.org/10.1016/j.livsci.2008.05.022>
- 32 100. Verge, X. P. C., Dyer, J. A., Desjardins, R. L., and Worth, D., 2011. Long-term trends in greenhouse gas  
33 emissions from the Canadian poultry industry, *J. Appl. Poult. Res.*, 18, 210-222, doi: 10.3382/japr.2008-  
34 00091
- 35 101. Veysset, P., Lherm, M., and Bebin, D., 2011. Productive, environmental and economic performances  
36 assessments of organic and conventional suckler cattle farming systems, *Org. Agr.*, 1, 1-16, DOI  
37 10.1007/s13165-010-0001-0
- 38 102. Villanueva-Rey, P., Vazquez-Rowe, I., Moreira, M. T., and Feijoo, G., 2014. Comparative life cycle  
39 assessment in the wine sector: biodynamic vs. conventional viticulture activities in NW Spain, *Journal of  
40 Cleaner Production*, 65, 330-341, <http://dx.doi.org/10.1016/j.jclepro.2013.08.026>
- 41 103. Vinyes, E., Gasol, C. M., Asin, L., Alegre, S., and Munoz, P., 2015. Life cycle assessment of multiyear peach  
42 production, *Journal of Cleaner Production*, 104, 68-79, <http://dx.doi.org/10.1016/j.jclepro.2015.05.041>
- 43 104. Wallman, M., Cederberg, C., and Sonesson, U., 2011. Life cycle assessment of Swedish Lamb Production,  
44 *Swedish Farmers' Foundation for Agricultural Research*.
- 45 105. Wang, C., Li, X., Gong, T., and Zhang, H., 2014. Life cycle assessment of wheat-maize rotation systems  
46 emphasizing high crop yield and high resource use efficiency in Quzhou County, *Journal of Cleaner  
47 Production*, 68, 56-63, <http://dx.doi.org/10.1016/j.jclepro.2014.01.018>
- 48 106. White, R. R., Brady, M., Capper, J. L., Johnson, K. A., 2014. Optimizing diet and pasture management to  
49 improve sustainability of U.S. beef production, *Agricultural Systems*, 130, 1-12,  
50 <http://dx.doi.org/10.1016/j.agsy.2014.06.004>

1 107. White, R. R., Brady, M., Capper, J. L., McNamara, J. P., and Johnson, K. A., 2015. Cow-calf reproductive,  
2 genetic, and nutritional management to improve the sustainability of whole beef production systems, *J. Anim.*  
3 *Sci.*, 93, 3197-3211, doi:10.2527/jas2014-8800  
4 108. Wiedemann, S. G., Ledgard, S. F., Henry, B. K., Yan, M., Mao, N., and Russell, S. J., 2015. Application of  
5 life cycle assessment to sheep production systems: Investigating co-production of wool and meet using case  
6 studies from major global producers, *Int. J. Life Cycle Assess.*, 20(4), 463-476, DOI 10.1007/s11367-015-  
7 0849-z  
8 109. Williams, A. G., Audsley, E., and Sandars, D. L., 2006. Determining the environmental burdens and resource  
9 use in the production of agricultural and horticultural commodities, Defra Research Project IS0205, Bedford:  
10 Cranfield University and Defra. Available on [www.silsoe.cranfield.ac.uk](http://www.silsoe.cranfield.ac.uk), and [www.defra.gov.uk](http://www.defra.gov.uk)  
11 110. Williams, A. G., Audsley, E., and Sandars, D. L., 2010. Environmental burdens of producing bread wheat,  
12 oilseed rape and potatoes in England and Wales using simulation and system modelling, *Int. J. Life Cycle*  
13 *Assess.*, 15, 855-868, DOI 10.1007/s11367-010-0212-3  
14 111. Yousefi, M., Khoramivafa, M., and Mondani, F., 2014. Integrated evaluation of energy use, greenhouse gas  
15 emissions and global warming potential for sugar beet (*Beta vulgaris*) agroecosystems in Iran, *Atmospheric*  
16 *Environment*, 92, 501-505, <http://dx.doi.org/10.1016/j.atmosenv.2014.04.050>  
17 112. Zervas, G. and Tsiplakou, E., 2012. An assessment of GHG emissions from small ruminants in comparison  
18 with GHG emissions from large ruminants and monogastric livestock, *Atmospheric Environment*, 49, 13-23,  
19 <https://doi.org/10.1016/j.atmosenv.2011.11.039>  
20 113. Zhu, B., Kros, J., Lesschen, J. P., Staritsky, I. G., and de Vries, W., 2016. Assessment of uncertainties in  
21 greenhouse gas emission profiles of livestock sectors in Africa, Latin America, and Europe, *Regional*  
22 *Environmental Change*, 16(6), 1571-1582.

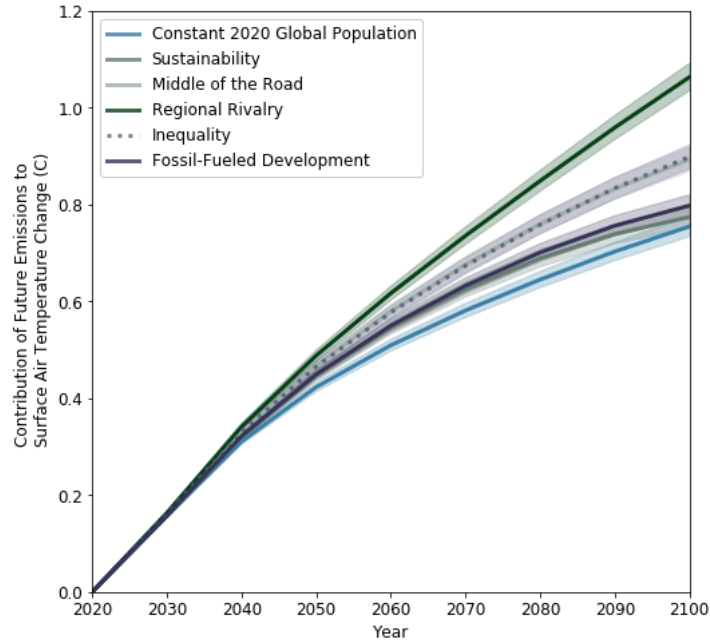

1  
 2  
 3 **Figure S1: Contribution of future emissions to surface air temperature change associated with sustained food**  
 4 **consumption rates starting in 2020 and continuing through the end of the century based on five population**  
 5 **projections. The population projections are compatible with the following Shared Socioeconomic Pathways**  
 6 **(SSPs) as outlined in Riahi et al. 2017: Regional Rivalry, Inequality, Middle of the Road, Fossil-Fueled**  
 7 **Development, and Sustainability (corresponding to SSP3, SSP4, SSP2, SSP5, and SSP1, respectively). The**  
 8 **future warming associated with consumption from a constant 2020 global population is also provided for**  
 9 **reference. Emissions for all sectors other than agriculture are represented by RCP4.5. Final 2100 contribution**  
 10 **to surface air temperature change is higher for the RCP4.5 scenario than RCP8.5 scenario due to the**  
 11 **logarithmic relationship between CO<sub>2</sub> radiative efficiency and concentration. Shading represents 95%**  
 12 **confidence intervals based on all ensemble members. Inequality (SSP4) scenario identified by dotted line in**  
 13 **order to better visualize overlapping scenarios.**

14

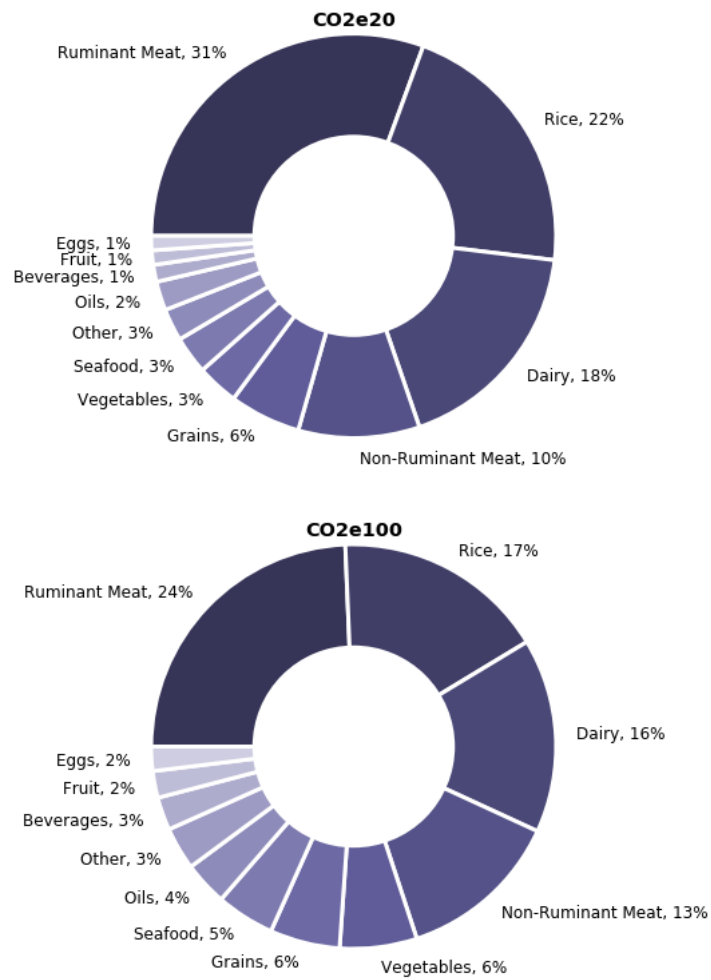

1  
2  
3

4 **Figure S2: Relative contribution of each food group to future climate change, measured by annual emissions**  
5 **in CO<sub>2</sub>e20 and CO<sub>2</sub>e100.**

| Food Group<br>(Emissions<br>Magnitude in<br>CO <sub>2</sub> e100/kg<br>food group*) | Food Item | Percent Gas Contribution |                      |                             | Citation                    | Notes                                          |
|-------------------------------------------------------------------------------------|-----------|--------------------------|----------------------|-----------------------------|-----------------------------|------------------------------------------------|
|                                                                                     |           | CO <sub>2</sub>          | CH <sub>4</sub>      | N <sub>2</sub> O            |                             |                                                |
| <b>Grains</b><br>(1.3)                                                              | Barley    | 53                       | 2                    | 44                          | Christoforou et al. 2016    | No land use change                             |
|                                                                                     |           | 47                       | 2                    | 51                          | Fallahpour et al. 2012      | Irrigated barley; no land use change           |
|                                                                                     |           | 51                       | 1                    | 48                          | Fallahpour et al. 2012      | Rainfed barley; no land use change             |
|                                                                                     |           | 65                       | 2                    | 33                          | Kramer et al. 1999          | Spring/winter barley; land use change included |
|                                                                                     |           | 57                       | 3                    | 40                          | Nemecek et al. 2011         | Land use change included                       |
|                                                                                     | Maize     | 91                       | 2                    | 7                           | Bartl et al. 2012           | Hard maize; land use change included           |
|                                                                                     |           | 53                       | 2                    | 45                          | Christoforou et al. 2016    | No land use change                             |
|                                                                                     |           | 63                       | 1                    | 36                          | Grassini and Cassman 2012   | No land use change                             |
|                                                                                     |           | 57                       | 6                    | 37                          | Murphy and Kendall 2013     | Maize/stover; no land use change               |
|                                                                                     |           | 70                       | 2                    | 28                          | Nemecek et al. 2011         | Land use change included                       |
|                                                                                     |           | 69                       | 0                    | 31                          | Soni and Salohke 2013       | No land use change                             |
|                                                                                     |           | 99                       | 1                    | 0                           | Wang et al. 2014            | Summer maize; no land use change               |
|                                                                                     | Rye       | 73                       | 2                    | 25                          | Nemecek et al. 2011         | Land use change included                       |
|                                                                                     | Sorghum   | 55                       | 2                    | 43                          | Christoforou et al. 2016    | Sweet sorghum; no land use change              |
|                                                                                     | Wheat     | 35                       | 0                    | 65                          | Aryal et al. 2015           | Land use change included                       |
|                                                                                     |           | 74                       | 5                    | 21                          | Biswas et al. 2008          | No land use change                             |
|                                                                                     |           | 55                       | 2                    | 43                          | Christoforou et al. 2016    | No land use change                             |
|                                                                                     |           | 49                       | 4                    | 47                          | Fallahpour et al. 2012      | Irrigated wheat; no land use change            |
|                                                                                     |           | 48                       | 4                    | 48                          | Fallahpour et al. 2012      | Rainfed wheat; no land use change              |
|                                                                                     |           | 92                       | 0                    | 8                           | Koga et al. 2016            | Winter wheat; no land use change               |
|                                                                                     |           | 50                       | 0                    | 50                          | Korsaeth et al. 2012        | Winter wheat; no land use change               |
|                                                                                     |           | 55                       | 1                    | 44                          | Kramer et al. 1999          | Spring/winter wheat; land use change included  |
|                                                                                     |           | 56                       | 0                    | 44                          | Lillywhite et al. 2007      | Winter wheat; no land use change               |
|                                                                                     |           | 54                       | 3                    | 43                          | Nemecek et al. 2011         | Land use change included                       |
|                                                                                     |           | 100                      | 0                    | 0                           | Soltani et al. 2013         | No land use change                             |
|                                                                                     |           | 29                       | 0                    | 71                          | Tidaker et al. 2007         | No land use change                             |
|                                                                                     |           | 95                       | 5                    | 0                           | Wang et al. 2014            | Winter wheat; no land use change               |
| 19                                                                                  | 1         | 80                       | Williams et al. 2010 | No land use change          |                             |                                                |
| Misc.                                                                               | 78        | 0                        | 22                   | Aguilera et al. 2015        | Cereals; no land use change |                                                |
| <b>AVERAGE</b>                                                                      | <b>62</b> | <b>2</b>                 | <b>36</b>            |                             |                             |                                                |
| <b>Rice</b><br>(3.8)                                                                | Rice      | 9                        | 88                   | 3                           | Aguilera et al. 2015        | No land use change                             |
|                                                                                     |           | 28                       | 71                   | 1                           | Brodt et al. 2014           | Land use change included                       |
|                                                                                     |           | 2                        | 97                   | 1                           | Harada et al. 2007          | No land use change                             |
|                                                                                     |           | 31                       | 66                   | 3                           | Hokazono et al. 2009        | No land use change                             |
|                                                                                     |           | 26                       | 69                   | 5                           | Nemecek et al. 2011         | Land use change included                       |
|                                                                                     |           | 50                       | 34                   | 16                          | Pathak et al. 2013          | No land use change                             |
|                                                                                     |           | 27                       | 63                   | 10                          | Soni and Salohke 2013       | No land use change                             |
|                                                                                     | 5         | 86                       | 9                    | Arunrat and Pumijumnon 2017 | No land use change          |                                                |
| <b>AVERAGE</b>                                                                      | <b>24</b> | <b>63</b>                | <b>13</b>            |                             |                             |                                                |
| <b>Fruits</b><br>(0.6)                                                              | Apples    | 79                       | 2                    | 19                          | Bartyl et al. 2012          | Land use change included                       |
|                                                                                     |           | 86                       | 3                    | 11                          | Cerutti et al. 2013         | No land use change                             |
|                                                                                     |           | 90                       | 0                    | 10                          | Lillywhite et al. 2007      | No land use change                             |
|                                                                                     |           | 76                       | 2                    | 22                          | Nemecek et al. 2011         | Land use change included                       |

|                            |                |    |    |                        |                           |                                            |
|----------------------------|----------------|----|----|------------------------|---------------------------|--------------------------------------------|
|                            |                | 21 | 0  | 79                     | Keyes et al. 2015         | No land use change                         |
|                            | Avocado        | 50 | 1  | 49                     | Astier et al. 2014        | No land use change                         |
|                            |                | 57 | 2  | 41                     | Bartyl et al. 2012        | Land use change included                   |
|                            | Bananas        | 76 | 2  | 22                     | Nemecek et al. 2011       | Land use change change included            |
|                            |                | 75 | 0  | 25                     | Soni and Salokhe 2013     | No land use change                         |
|                            |                | 88 | 7  | 5                      | Svanes and Aronsson 2013  | No land use change                         |
|                            | Cherry         | 25 | 4  | 71                     | Litskas et al. 2011       | No land use change                         |
|                            | Lemons         | 56 | 0  | 44                     | Martin Gorriz et al. 2014 | No land use change                         |
|                            | Melon          | 35 | 23 | 41                     | de Figueiredo et al. 2015 | No land use change                         |
|                            |                | 96 | 1  | 3                      | Kehagias et al. 2015      | No land use change                         |
|                            |                | 58 | 0  | 42                     | Martin Gorriz et al. 2014 | No land use change                         |
|                            | Oranges        | 42 | 2  | 56                     | Bartyl et al. 2012        | Mandarin oranges; land use change included |
|                            |                | 53 | 0  | 47                     | Martin Gorriz et al. 2014 | Mandarin oranges; no land use change       |
|                            |                | 54 | 0  | 47                     | Martin Gorriz et al. 2014 | No land use change                         |
|                            |                | 79 | 3  | 18                     | Nemecek et al. 2011       | Land use change included                   |
|                            | Peaches        | 63 | 2  | 35                     | Bartyl et al. 2012        | Land use change included                   |
|                            |                | 99 | 1  | 0                      | Michos et al. 2012        | No land use change                         |
|                            |                | 73 | 6  | 21                     | Nemecek et al. 2011       | Land use change included                   |
|                            |                | 85 | 5  | 10                     | Nikkhah et al. 2017       | No land use change                         |
|                            |                | 99 | 0  | 1                      | Vinyes et al. 2015        | No land use change                         |
|                            | Strawberries   | 61 | 1  | 38                     | Bartyl et al. 2012        | Land use change included                   |
|                            |                | 98 | 0  | 2                      | Lillywhite et al. 2007    | No land use change                         |
|                            | <b>AVERAGE</b> | 69 | 2  | 29                     |                           |                                            |
| <b>Vegetables</b><br>(0.9) | Almonds        | 67 | 5  | 28                     | Nemecek et al. 2011       | Land use change included                   |
|                            | Artichoke      | 59 | 0  | 41                     | Martin Gorriz et al. 2014 | No land use change                         |
|                            | Asparagus      | 70 | 5  | 25                     | Bartyl et al. 2012        | Land use change included                   |
|                            | Beans          | 96 | 0  | 4                      | Koga et al. 2016          | Adzuki beans; no land use change           |
|                            |                | 65 | 2  | 33                     | Kramer et al. 1999        | French beans; no land use change           |
|                            | Beet           | 86 | 0  | 14                     | Koga et al. 2016          | Sugar beet; no land use change             |
|                            |                | 57 | 1  | 42                     | Christoforou et al. 2016  | Sugar beet; no land use change             |
|                            |                | 68 | 0  | 32                     | Lillywhite et al. 2007    | Sugar beet; no land use change             |
|                            |                | 55 | 3  | 42                     | Nemecek et al. 2011       | Sugar beet; land use change included       |
|                            |                | 58 | 20 | 22                     | Yousefi et al. 2014       | Sugar beet; no land use change             |
|                            | Broccoli       | 50 | 0  | 50                     | Martin Gorriz et al. 2014 | No land use change                         |
|                            | Cabbage        | 92 | 0  | 8                      | Koga et al. 2016          | No land use change                         |
|                            | Carrot         | 85 | 0  | 15                     | Lillywhite et al. 2007    | No land use change                         |
|                            |                | 75 | 4  | 22                     | Nemecek et al. 2011       | Land use change included                   |
|                            | Cashew         | 38 | 0  | 62                     | de Figueiredo et al. 2015 | No land use change                         |
|                            | Cassava        | 84 | 0  | 16                     | Soni and Salokhe 2013     | No land use change                         |
|                            | Cauliflower    | 60 | 0  | 40                     | Lillywhite et al. 2007    | No land use change                         |
|                            | Chestnuts      | 75 | 5  | 20                     | Rosa et al. 2017          | No land use change                         |
|                            | Cucumber       | 59 | 6  | 35                     | Khoshnevisan et al. 2014  | No land use change                         |
|                            | Hazelnuts      | 71 | 5  | 24                     | Nemecek et al. 2011       | Land use change included                   |
| Lettuce                    | 97             | 0  | 3  | Lillywhite et al. 2007 | No land use change        |                                            |

|                                 |                |           |          |           |                             |                                                |
|---------------------------------|----------------|-----------|----------|-----------|-----------------------------|------------------------------------------------|
|                                 |                | 53        | 0        | 47        | Martin Gorritz et al. 2014  | No land use change                             |
|                                 | Onion          | 75        | 0        | 25        | Lillywhite et al. 2007      | No land use change                             |
|                                 |                | 67        | 3        | 30        | Nemecek et al. 2011         | Land use change included                       |
|                                 | Peas           | 62        | 2        | 36        | Nemecek et al. 2011         | Land use change included                       |
|                                 | Peppers        | 76        | 4        | 20        | Nemecek et al. 2011         | Land use change included                       |
|                                 | Pidgeonpea     | 73        | 0        | 27        | Pratibha et al. 2015        | No land use change                             |
|                                 | Potatoes       | 29        | 1        | 70        | Bartyl et al. 2012          | Land use change included                       |
|                                 |                | 55        | 2        | 43        | Christoforou et al. 2016    | No land use change                             |
|                                 |                | 97        | 0        | 3         | Koga et al. 2016            | No land use change                             |
|                                 |                | 62        | 1        | 37        | Kramer et al. 1999          | No land use change                             |
|                                 |                | 84        | 0        | 16        | Lillywhite et al. 2007      | No land use change                             |
|                                 |                | 68        | 4        | 28        | Nemecek et al. 2011         | Land use change included                       |
|                                 |                | 48        | 2        | 50        | Norton et al. 2008          | Land use change included                       |
|                                 |                | 48        | 2        | 50        | Williams et al. 2006        | No land use change                             |
|                                 |                | 47        | 2        | 51        | Williams et al. 2010        | No land use change                             |
|                                 | Pumpkin        | 67        | 3        | 30        | Nemecek et al. 2011         | Land use change included                       |
|                                 | Soybeans       | 39        | 0        | 61        | Castanheira and Freire 2013 | Land use change included                       |
|                                 |                | 60        | 3        | 37        | Mohammadi et al. 2013       | No land use change                             |
|                                 |                | 90        | 1        | 9         | Nemecek et al. 2011         | Land use change included                       |
|                                 |                | 65        | 0        | 35        | Soni and Salokhe 2013       | No land use change                             |
|                                 | Spinach        | 53        | 3        | 44        | Nemecek et al. 2011         | Land use change included                       |
|                                 | Tomatoes       | 25        | 0        | 75        | He et al. 2016              | No land use change                             |
|                                 |                | 58        | 7        | 35        | Khoshnevisan et al. 2014    | No land use change                             |
|                                 |                | 78        | 5        | 17        | Nemecek et al. 2011         | Land use change included                       |
|                                 | Misc.          | 65        | 13       | 22        | Aguilera et al. 2015        | Legumes; no land use change                    |
|                                 |                | 33        | 6        | 61        | Aguilera et al. 2015        | Open air vegetables; no land use change        |
|                                 |                | 84        | 2        | 14        | Aguilera et al. 2015        | Greenhouse vegetables; no land use change      |
|                                 |                | 88        | 0        | 12        | Soni and Salokhe 2013       | Vegetables; no land use change                 |
|                                 |                | 67        | 2        | 31        | Kramer et al. 1999          | Vegetables; no land use change                 |
|                                 | <b>AVERAGE</b> | <b>65</b> | <b>3</b> | <b>32</b> |                             |                                                |
| <b>Ruminant Meat<br/>(33.6)</b> | Beef           | 5         | 82       | 13        | Alemu et al. 2016           | No land use change                             |
|                                 |                | 7         | 68       | 25        | Basarab et al. 212          | No land use change                             |
|                                 |                | 5         | 85       | 10        | Cardoso et al. 2016         | No land use change                             |
|                                 |                | 2         | 82       | 17        | Cederberg et al. 2009       | No land use change                             |
|                                 |                | 3         | 83       | 14        | Mazzetto et al. 2015        | No land use change                             |
|                                 |                | 8         | 54       | 38        | Phetteplace et al. 2001     | No land use change                             |
|                                 |                | 3         | 92       | 5         | Ridoutt et al. 2011         | No land use change                             |
|                                 |                | 7         | 67       | 26        | Verge et al. 2008           | No land use change                             |
|                                 |                | 11        | 69       | 20        | Veysset et al. 2011         | Land use change included                       |
|                                 |                | 5         | 84       | 11        | White et al. 2014           | No land use change                             |
|                                 |                | 9         | 85       | 6         | White et al. 2015           | No land use change                             |
|                                 |                | 13        | 65       | 23        | Zhu et al. 2015             | Land use change included                       |
|                                 |                | Lamb      | 14       | 47        | 39                          | Lillywhite et al. 2007                         |
|                                 | 10             |           | 64       | 26        | Wallman et al. 2011         | No land use change                             |
|                                 | 4              |           | 85       | 11        | Wiedemann et al. 2015       | No land use change                             |
|                                 | Misc.          | 13        | 60       | 27        | Zhu et al. 2015             | Sheep and goat; land use change included       |
|                                 |                | 58        | 34       | 8         | Zervas and Tsiplakou 2011   | Cattle and buffaloes; land use change included |

|                                 |                 |                |    |                       |                                    |                                          |
|---------------------------------|-----------------|----------------|----|-----------------------|------------------------------------|------------------------------------------|
|                                 |                 | 60             | 25 | 15                    | Zervas and Tsiplakou 2011          | Sheep and goat; land use change included |
|                                 |                 | 34             | 39 | 27                    | Steinfeld et al. 2006              | Land use change included                 |
|                                 | <b>AVERAGE</b>  | 14             | 68 | 18                    |                                    |                                          |
| <b>Non-Ruminant Meat (11.7)</b> | Chicken         | 61             | 14 | 25                    | de Silva et al. 2014               | No land use change                       |
|                                 |                 | 67             | 5  | 28                    | Zhu et al. 2015                    | No land use change                       |
|                                 | Pork            | 53             | 32 | 15                    | Bava et al. 2017                   | Land use change included                 |
|                                 |                 | 57             | 27 | 16                    | Cherubini et al. 2014              | Land use change included                 |
|                                 |                 | 30             | 9  | 61                    | Dolman et al. 2012                 | No land use change                       |
|                                 |                 | 54             | 17 | 29                    | Gonzales Garcia et al. 2015        | No land use change                       |
|                                 |                 | 70             | 29 | 1                     | Gutierrez et al. 2016              | No land use change                       |
|                                 |                 | 47             | 30 | 23                    | Boakye et al. 2014                 | Land use change included                 |
|                                 |                 | 24             | 52 | 23                    | Verge et al. 2009                  | No land use change                       |
|                                 |                 | 61             | 28 | 11                    | Zervas and Tsiplakou 2011          | Land use change included                 |
|                                 | Misc.           | 32             | 31 | 37                    | Zhu et al. 2015                    | No land use change                       |
|                                 |                 | 39             | 5  | 56                    | Verge et al. 2009                  | Poultry; no land use change              |
|                                 |                 | 48             | 0  | 52                    | Zervas and Tsiplakou 2011          | Poultry; land use change included        |
|                                 | <b>AVERAGE</b>  | 49             | 22 | 29                    |                                    |                                          |
| <b>Seafood (5.6)</b>            | Freshwater Fish | 75             | 6  | 19                    | Gronroos et al. 2006               | Trout; no land use change                |
|                                 |                 | 75             | 5  | 20                    | Burchspies et al. 2011             | Salmon; no land use change               |
|                                 |                 | 85             | 5  | 10                    | Boissy et al. 2011                 | Trout and salmon; no land use change     |
|                                 | Pelagic Fish    | 84             | 14 | 2                     | Burchspies et al. 2011             | Mackerel and herring; no land use change |
|                                 |                 | 100            | 0  | 0                     | Astuti and Hadiyanto 2018          | Mackerel; no land use change             |
|                                 | Demersal Fish   | 94             | 3  | 3                     | Burchspies et al. 2011             | Cod; no land use change                  |
|                                 |                 | 99             | 0  | 1                     | Garcia et al. 2019                 | Sea bass; no land use change             |
|                                 |                 | 99             | 0  | 1                     | Garcia et al. 2016                 | Gilthead seabream; no land use change    |
|                                 | Mussels         | 93             | 8  | 2                     | Iribarren et al. 2010              | Canned; no land use change               |
|                                 |                 | <b>AVERAGE</b> | 89 | 5                     | 6                                  |                                          |
| <b>Dairy (3.1)</b>              | Milk            | 25             | 49 | 26                    | Bos et al. 2014                    | No land use change                       |
|                                 |                 | 11             | 65 | 24                    | Cederberg et al. 2004              | No land use change                       |
|                                 |                 | 5              | 81 | 14                    | Cunha et al. 2016                  | No land use change                       |
|                                 |                 | 28             | 49 | 23                    | Fantin et al. 2012                 | No land use change                       |
|                                 |                 | 9              | 70 | 21                    | Flysjo et al. 2011                 | No land use change                       |
|                                 |                 | 3              | 64 | 33                    | Geough et al. 2012                 | No land use change                       |
|                                 |                 | 23             | 66 | 11                    | Guerci et al. 2013                 | No land use change                       |
|                                 |                 | 10             | 65 | 25                    | Jayasundara and Wagner Riddle 2013 | No land use change                       |
|                                 |                 | 41             | 41 | 18                    | Lillywhite et al. 2007             | No land use change                       |
|                                 |                 | 14             | 70 | 16                    | Mathot et al. 2014                 | No land use change                       |
|                                 |                 | 20             | 63 | 17                    | O'Brien et al. 2012                | Land use change included                 |
|                                 |                 | 12             | 66 | 23                    | O'Brien et al. 2014                | Land use change included                 |
|                                 |                 | 29             | 49 | 22                    | Penati et al. 2013                 | No land use change                       |
|                                 |                 | 19             | 51 | 31                    | Thomassen et al. 2008              | No land use change                       |
|                                 |                 | 10             | 67 | 23                    | Van der Werf et al. 2009           | No land use change                       |
|                                 |                 | 30             | 57 | 13                    | Vegnoni et al. 2015                | No land use change                       |
|                                 | 72              | 19             | 9  | Cederberg et al. 2012 | Land use change included           |                                          |
|                                 | Misc.           | 10             | 65 | 25                    | Phetteplace et al. 2001            | Dairy; no land use change                |
| 29                              |                 | 46             | 25 | Rivas et al. 2015     | Dairy; no land use change          |                                          |

|                           |                |                |    |    |                                |                                                              |
|---------------------------|----------------|----------------|----|----|--------------------------------|--------------------------------------------------------------|
|                           |                | 15             | 65 | 21 | Samson et al. 2012             | Dairy; no land use change                                    |
|                           |                | 22             | 58 | 22 | Sandrucci et al. 2014          | Dairy; no land use change                                    |
|                           |                | 20             | 62 | 17 | Boakye et al. 2014             | Dairy; no land use change                                    |
|                           |                | 15             | 64 | 21 | Saunders and Barber 2007       | Dairy; no land use change                                    |
|                           |                | 51             | 36 | 13 | Muhammad Taufiq et al. 2016    | Dairy (modern and local practices); land use change included |
|                           |                | 64             | 24 | 12 | Nilsson et al. 2010            | Dairy; land use change included                              |
|                           |                | 36             | 44 | 20 | Zhu et al. 2015                | Average of cow and sheep/goat milk; land use change included |
|                           | <b>AVERAGE</b> | 22             | 59 | 19 |                                |                                                              |
| <b>Eggs</b><br>(4.5)      | Eggs           | 57             | 3  | 40 | Dekker et al. 2011             | No land use change                                           |
|                           |                | 39             | 5  | 56 | Cederberg et al. 2012          | Land use change included                                     |
|                           |                | 56             | 5  | 39 | Zhu et al. 2015                | Land use change included                                     |
|                           |                | 43             | 6  | 51 | Williams et al. 2006           | Land use change included                                     |
|                           |                | 21             | 4  | 75 | Dekker et al. 2008             | Land use change included                                     |
|                           |                | 34             | 16 | 50 | Verge et al. 2009              | Land use change included                                     |
|                           | <b>AVERAGE</b> | 41             | 7  | 52 |                                |                                                              |
| <b>Oils</b><br>(4.5)      | Castor         | 72             | 0  | 28 | Pratibha et al. 2015           | No land use change                                           |
|                           | Linseed        | 69             | 3  | 28 | Nemecek et al. 2011            | Land use change included                                     |
|                           | Olive oil      | 89             | 3  | 8  | Rinaldi et al. 2014            | No land use change                                           |
|                           | Palm oil       | 95             | 0  | 5  | Castanheira et al. 2014        | Land use change included                                     |
|                           |                | 86             | 1  | 13 | Nemecek et al. 2011            | Land use change included                                     |
|                           |                | 17             | 67 | 16 | Stichnothe and Schuchardt 2011 | No land use change                                           |
|                           |                | 27             | 48 | 25 | Schmidt 2007                   | No land use change                                           |
|                           | Peanut oil     | 78             | 3  | 20 | Nemecek et al. 2011            | Land use change included                                     |
|                           | Rapeseed       | 65             | 3  | 32 | Nemecek et al. 2011            | Land use change included                                     |
|                           | <b>AVERAGE</b> | 61             | 13 | 26 |                                |                                                              |
| <b>Beverages</b><br>(5.7) | Wine           | 100            | 0  | 0  | Fusi et al. 2014               | No land use change                                           |
|                           |                | 75             | 13 | 12 | Neto et al. 2013               | No land use change                                           |
|                           |                | 58             | 0  | 42 | Vazquez Rowe et al. 2012       | No land use change                                           |
|                           |                | 85             | 0  | 15 | Vazquez Rowe et al. 2014       | No land use change                                           |
|                           | Coffee         | 76             | 0  | 24 | Noponen et al. 2012            | Land use change included in some portions                    |
|                           |                | 30             | 0  | 70 | Segura and Andrade 2012        | Land use change inclusion cannot be identified               |
|                           |                | 55             | 0  | 45 | Oelbermann 2014                | Land use change included in some portions                    |
|                           | Beer           | 95             | 0  | 5  | Shin and Searcy 2018           | No land use change                                           |
|                           |                | <b>AVERAGE</b> | 72 | 2  | 26                             |                                                              |
| <b>Other</b><br>(6.5)     | Sugar          | 31             | 47 | 22 | Mashoko et al. 2010            | No land use change                                           |
|                           |                | 81             | 2  | 17 | Nemecek et al. 2011            | Sugar cane; land use change included                         |
|                           |                | 67             | 0  | 33 | Ramjeawon 2004                 | Sugar cane; no land use change                               |
|                           |                | <b>AVERAGE</b> | 60 | 16 | 24                             |                                                              |

1

2 **Table S1: List of percent contribution toward total CO<sub>2</sub>e100 from CO<sub>2</sub>, methane, and nitrous oxide for**  
3 **individual food items based on previous studies. The notes column indicates specific types of food analyzed**  
4 **and whether land use change is included in the analysis. Values presented here reflect an average of**  
5 **individual estimations (354 in total) provided by each source, and precede an adjustment to account for land**  
6 **use change. The average for each gas species is highlighted in grey. Values have also been adjusted to reflect**  
7 **the most up-to-date estimations of GWP for CO<sub>2</sub>, CH<sub>4</sub>, and N<sub>2</sub>O (1, 34, and 298, respectively).**

- 1 \*The total emissions in kg CO<sub>2</sub>e100/kg food group consumed calculated based on data from Poore and Nemecek
- 2 2018 are provided in italics below each food group name. We note that they use GWP100 values from the
- 3 Intergovernmental Panel on Climate Change (IPCC) Fourth Assessment Report (AR4) (2007).

| Scenario                                               |                                | Population Projection   |                             |                           |                     |                                       |
|--------------------------------------------------------|--------------------------------|-------------------------|-----------------------------|---------------------------|---------------------|---------------------------------------|
|                                                        |                                | SSP1,<br>Sustainability | SSP2,<br>Middle of the Road | SSP3,<br>Regional Rivalry | SSP4,<br>Inequality | SSP5,<br>Fossil-Fueled<br>Development |
| Baseline Contribution to Warming from Food Consumption | Total Warming (°C in 2100)     | 0.67                    | 0.77                        | 0.91                      | 0.77                | 0.69                                  |
| Production Improvement Scenario Avoided Warming        | Warming Reduction (°C in 2100) | 0.15                    | 0.18                        | 0.21                      | 0.18                | 0.16                                  |
|                                                        | Percent Reduction (% in 2100)  | 23                      | 23                          | 23                        | 23                  | 23                                    |
| Healthy Diet Scenario Avoided Warming                  | Warming Reduction (°C in 2100) | 0.14                    | 0.16                        | 0.19                      | 0.16                | 0.15                                  |
|                                                        | Percent Reduction (% in 2100)  | 21                      | 21                          | 21                        | 21                  | 21                                    |
| 50% Retail-Level Food Waste Reduction                  | Warming Reduction (°C in 2100) | 0.02                    | 0.02                        | 0.02                      | 0.02                | 0.02                                  |
|                                                        | Percent Reduction (% in 2100)  | 3                       | 2                           | 3                         | 2                   | 3                                     |
| 50% Consumer-Level Food Waste Reduction                | Warming Reduction (°C in 2100) | 0.03                    | 0.04                        | 0.04                      | 0.04                | 0.03                                  |
|                                                        | Percent Reduction (% in 2100)  | 5                       | 5                           | 5                         | 5                   | 5                                     |
| All Mitigation Scenarios                               | Warming Reduction (°C in 2100) | 0.29                    | 0.33                        | 0.40                      | 0.34                | 0.30                                  |
|                                                        | Percent Reduction (% in 2100)  | 44                      | 44                          | 44                        | 44                  | 44                                    |

1

2 **Table S2: Table outlining the net reduction and percent reduction of the total contribution to future warming associated with each mitigation scenario**  
3 **for the set of five population projections.**
