# Supplementary material for: Future Warming from Global Food Consumption
Source: Research Square preprint supplement (doi:10.21203/rs.3.rs-1964969/v1), 2022-08-26
Supplement: Supplementary file 1 [file 87c14f5128e09c907d5ef896.xlsx]

## Sheet: Description
SUPPLEMENTAL MATERIAL: Emissions Inventory
Future Warming Impacts of Global Food Consumption
Sheet #1: Food Item Emissions		- Total emissions of CO2, CH4, and N2O for individual food items per item mass produced, per capita consumed, and total for the global population in year 2020
Sheet #2: Global Projections		- Total annual dietary emissions of CO2, CH4, and N2O for the five global population projections in year 2100*
Sheet #3: Country Summaries		- Annual dietary emissions of CO2, CH4, and N2O per capita and total for each country for present day (underlying data from years 2013-2019)**
Sheets #4 - #10: Country-level data		- Annual consumption of individual food items for each country in weight, calories, and protein from FAOSTAT database (FAO 2019)
		- Greenhouse gas emissions in CO2e*** of each food item from Poore and Nemecek (2018)
		- Annual greenhouse gas emissions in CO2e*** from consumption of each food item for each country
		- Annual greenhouse gas emissions in CO2e*** from consumption of each food group for each country
		- Annual individual greenhouse gas component emissions for each food item and food group based on 113 studies****
		- Country-level data organized by seven regions defined in FAO 2011
*Five global population projections from Riahi et al. 2017
**Country level population projections from FAOSTAT database (FAO 2019)
***CO2e values used in Poore and Nemecek (2018):					GWP100
				CH4	25
				N2O	298
****Data and sources for calculating emissions by gas component are outlined in the Supplemental Materials document
Sources:
Riahi, K., van Vuuren, D. P., Kriegler, E., Edmonds, J., O’Neill, B. C., et al., 2017. The Shared Socioeconomic Pathways and their energy, land use, and greenhouse gas emissions implications: An overview, Global Environmental Change, 42, 153-168.
Food and Agriculture Organization, 2019. FAOSTAT, Rome, Italy.
Poore, J. and T. Nemecek, 2018. Reducing food’s environmental impacts through producers and consumers. Science, 360 (6392), pp. 987-992.
Food and Agriculture Organization, 2011. Global food losses and food waste: Extent, causes and prevention, Study conducted for the International Congress SAVE FOOD! At Interpack2011, Dusseldorf, Germany, pp. 37.

## Sheet: Food Item Emissions
Food Group		Food Item	GHG Emissions per Mass Food Produced (kg gas/kg food)			GHG Emissions per Annual Consumption (kg gas/capita/yr)			Global Emissions for Year 2020 (Mt gas)
			CO2	CH4	N2O	CO2	CH4	N2O	CO2	CH4	N2O
Grain products (non-rice)		Wheat	0.81	0.001	0.0019	54.3426	0.0675763	0.126926	417.721	0.519445	0.975654
		Barley	0.72	0.001	0.0019	0.766645	0.00107422	0.00205171	5.89304	0.00825734	0.0157711
		Maize	0.71	0.00081	0.00087	13.3266	0.0152429	0.0162336	102.439	0.117169	0.124784
		Millet	0.81	0.00095	0.0016	2.4343	0.00283608	0.0048114	18.712	0.0218004	0.0369842
		Rye	1.03	0.00093	0.0012	0.63625	0.000573614	0.000729563	4.89072	0.00440925	0.005608
		Oats	0.97	0.0011	0.0019	0.652145	0.00075978	0.00128896	5.0129	0.00584027	0.00990799
		Sorghum	0.81	0.00095	0.0016	2.92116	0.0034033	0.00577368	22.4544	0.0261604	0.044381
		Cereals, other	0.81	0.00095	0.0016	0.778977	0.000907546	0.00153965	5.98783	0.00697612	0.0118349
Rice		Rice (milled equivalent)	0.85	0.11	0.00077	66.8426	8.64738	0.0606227	513.805	66.4707	0.465994
Fruit		Oranges, mandarines	0.18	0.00015	0.00045	2.16649	0.00186	0.0053496	16.6533	0.0142974	0.0411213
		Lemons, limes	0.18	0	0.00046	0.366359	0	0.000951312	2.81613	0	0.00731254
		Grapefruit	0.22	0.00031	0.00031	0.240084	0.000344698	0.000335564	1.84548	0.00264962	0.00257941
		Citrus, other	0.22	0.00031	0.00031	0.347031	0.000498245	0.000485043	2.66756	0.00382991	0.00372842
		Bananas	0.54	0.00084	0.0004	6.39101	0.00998371	0.00472235	49.1264	0.0767427	0.0362997
		Plantains	0.46	0.00066	0.00064	1.81279	0.00260268	0.00253372	13.9345	0.0200063	0.0194762
		Apples	0.26	0.00029	0.00031	2.3174	0.00263715	0.00273621	17.8134	0.0202712	0.0210327
		Pineapples	0.46	0.00066	0.00064	1.34703	0.00193398	0.00188274	10.3544	0.0148661	0.0144722
		Dates	0.46	0.00066	0.00064	0.452055	0.000649032	0.000631835	3.47486	0.00498898	0.00485678
		Grapes (excluding wine)	0.84	0.0012	0.0012	3.87001	0.00555631	0.00540908	29.7479	0.0427102	0.0415785
		Fruits, other	0.52	0.00074	0.00072	13.772	0.0197729	0.019249	105.862	0.15199	0.147963
Vegetables		Cassava	0.83	0.00014	0.00053	12.6261	0.00219024	0.00812163	97.0542	0.0168359	0.0624293
		Potatoes	0.22	0.00025	0.00048	7.27524	0.00811413	0.015792	55.9233	0.0623717	0.121389
		Sweet potatoes	0.24	0.00038	0.00039	1.65155	0.00259227	0.0026795	12.6951	0.0199262	0.0205968
		Yams	0.24	0.00038	0.00039	1.27282	0.00199782	0.00206504	9.78392	0.0153568	0.0158735
		Roots, other	0.24	0.00038	0.00039	0.455435	0.00071485	0.000738904	3.50084	0.0054949	0.0056798
		Tomatoes	0.76	0.0024	0.002	16.1682	0.0508257	0.042855	124.281	0.390686	0.329418
		Onions	0.28	0.00019	0.00036	3.31319	0.00226889	0.00427948	25.4678	0.0174405	0.0328955
		Vegetables, other	0.3	0.00047	0.00048	32.2413	0.0506059	0.0523087	247.833	0.388997	0.402087
		Aquatic plants	0	0	0	0	0	0	0	0	0
		Beans	1.21	0.0032	0.0011	3.03578	0.00815242	0.00268964	23.3354	0.062666	0.0206747
		Peas	0.6	0.0018	0.00085	0.458284	0.00142366	0.000657867	3.52274	0.0109434	0.00505689
		Pulses, other	1.06	0.0017	0.0017	4.20813	0.00660507	0.00682732	32.347	0.0507718	0.0524802
		Nuts	0.17	0.00042	0.00031	0.391324	0.000950388	0.000706094	3.00803	0.00730544	0.0054276
		Soybeans	1.2	0.00091	0.0023	1.66641	0.00126426	0.00312938	12.8094	0.00971811	0.0240549
		Groundnuts (shelled equivalents)	1.64	0.0026	0.0027	4.24716	0.00666633	0.00689064	32.647	0.0512427	0.0529669
Meat	Ruminant	Bovine meat	4.49	1.2	0.024	40.8954	11.3728	0.215652	314.354	87.4205	1.65767
		Mutton and goat meat	4.96	0.55	0.019	9.51599	1.05004	0.0372812	73.1474	8.07144	0.286573
	Non-ruminant	Pig meat	3.46	0.083	0.0059	53.827	1.28895	0.0914672	413.757	9.90788	0.703089
		Poultry meat	3.28	0.014	0.0082	51.0219	0.220969	0.128136	392.195	1.69854	0.984954
		Meat, other	3.31	0.057	0.0065	2.44749	0.0425222	0.00482495	18.8133	0.326859	0.0370884
		Offals, edible	13.3	0.23	0.026	31.1334	0.540905	0.0613759	239.316	4.15782	0.471784
Seafood		Freshwater fish	1.98	0.034	0.0039	16.1443	0.280487	0.0318266	124.098	2.15605	0.244644
		Demersal fish	3.15	0.0085	0.0022	8.97648	0.0243149	0.0061406	69.0003	0.186904	0.0472015
		Pelagic fish	3.67	0.012	0.00015	11.2732	0.0354715	0.000454322	86.6546	0.272662	0.00349228
		Marine fish, other	3.57	0.0075	0.00084	3.63962	0.00761778	0.00085582	27.977	0.0585563	0.00657851
		Crustaceans	6.54	0.014	0.0015	13.3416	0.0279243	0.00313715	102.554	0.214648	0.0241146
		Cephalopods	6.54	0.014	0.0015	3.00841	0.00629665	0.000707397	23.125	0.048401	0.00543762
		Molluscs, other	6.63	0.023	0.00045	17.3144	0.0598958	0.00116402	133.092	0.460406	0.00894756
		Aquatic animals, others	5.92	0.012	0.0014	0.947629	0.0019834	0.000222825	7.28423	0.015246	0.00171281
Dairy		Cream	0.67	0.063	0.0018	0.308302	0.0290136	0.000824221	2.36985	0.223022	0.00633562
		Butter, ghee	0.67	0.063	0.0018	0.495964	0.0466741	0.00132592	3.81237	0.358774	0.0101921
		Milk (excluding butter) *includes cheese	0.8	0.084	0.0023	63.638	6.68912	0.182906	489.172	51.4179	1.40596
Eggs		Eggs	1.87	0.012	0.0079	18.1055	0.113432	0.076129	139.173	0.87193	0.585188
Oils		Oilcrops, other	0.81	0.0068	0.0011	0.145113	0.00122897	0.00020303	1.11545	0.00944682	0.00156065
		Soybean oil	3.76	0.032	0.0053	11.4177	0.0966975	0.0159748	87.7659	0.743294	0.122795
		Groundnut oil	3.53	0.03	0.0049	2.01308	0.0170489	0.00281655	15.4742	0.131052	0.0216502
		Sunflowerseed oil	2.21	0.019	0.0031	3.36634	0.0285097	0.00470992	25.8764	0.219148	0.0362042
		Rape and mustard oil	2.49	0.0051	0.0041	3.23964	0.00656885	0.00527699	24.9024	0.0504934	0.0405631
		Cottonseed oil	3.53	0.03	0.0049	1.58928	0.0134597	0.00222359	12.2164	0.103462	0.0170923
		Palmkernel oil	3.23	0.067	0.0029	0.839615	0.0173417	0.00074618	6.45395	0.133302	0.00573573
		Sesame seed oil	3.53	0.03	0.0049	0.353173	0.00299104	0.000494132	2.71477	0.0229915	0.00379829
		Palm oil	4.68	0.039	0.0065	10.6624	0.0895941	0.0148898	81.9596	0.688691	0.114455
		Coconut oil	3.53	0.03	0.0049	0.529759	0.00448656	0.000741197	4.07215	0.0344873	0.00569743
		Olive Oil	5.3	0.0076	0.0015	2.06715	0.00297495	0.000592732	15.8898	0.0228678	0.00455621
		Rice bran oil	3.53	0.03	0.0049	0.211904	0.00179462	0.000296479	1.62886	0.0137949	0.00227897
		Maize germ oil	3.53	0.03	0.0049	0.953567	0.00807581	0.00133416	7.32987	0.0620771	0.0102554
		Oilcrops oil, other	3.53	0.03	0.0049	2.89602	0.0245265	0.00405188	22.2611	0.18853	0.031146
		Fats, animals, raw	4.13	0.035	0.0058	3.84468	0.0325608	0.00537917	29.5532	0.250288	0.0413486
		Fish, body oil	4.13	0.035	0.0058	0.0413406	0.000350116	5.78405e-05	0.317777	0.00269127	0.000444608
		Fish, liver oil	4.13	0.035	0.0058	0	0	0	0	0	0
		Sunflower seed	0.81	0.0068	0.0011	0.0564327	0.000477932	7.89562e-05	0.433787	0.00367376	0.00060692
		Rape and mustardseed	0.85	0.0017	0.0014	0	0	0	0	0	0
		Sesame seed	0.81	0.0068	0.0011	0.177627	0.00149256	0.000248051	1.36538	0.011473	0.00190672
		Palm kernels	0.74	0.015	0.00066	0	0	0	0	0	0
		Olives (including preserved)	1.17	0.0017	0.00034	0.468332	0.000674001	0.000134289	3.59997	0.00518091	0.00103225
		Coconuts (including copra)	0.81	0.0068	0.0011	2.16382	0.0181821	0.00302171	16.6328	0.139762	0.0232273
Beverages		Coffee	8.83	0	0.026	10.5097	0	0.03053	80.7858	0	0.234678
		Wine	1.26	0.0021	0.00095	3.88876	0.0065526	0.00291085	29.8921	0.0503685	0.0223751
		Beer	1.05	0	0.00019	24.7268	0	0.00436715	190.07	0	0.0335694
		Beverages, fermented	1.1	0.0016	0.00068	3.18108	0.00465523	0.0019527	24.4523	0.0357838	0.01501
		Beverages, alcoholic	1.1	0.0016	0.00068	3.21421	0.00470372	0.00197304	24.707	0.0361566	0.0151663
		Tea (including mate)	8.71	0.0082	0.011	7.22518	0.00684279	0.00894857	55.5384	0.0525991	0.0687858
Other		Sugar cane	1.98	0.0012	0.0022	9.44437	0.00560799	0.0106069	72.5969	0.0431075	0.0815334
		Sugar (non-centrifugal)	0.58	0.0064	0.00078	0.502964	0.00556974	0.000679651	3.86618	0.0428134	0.00522434
		Sugar beet	0.92	0.01	0.0012	0.00915456	0.000101376	1.23705e-05	0.0703692	0.000779256	9.50892e-05
		Sugar (raw equivalent)	0.3	0.018	0.00073	6.03956	0.374171	0.0148106	46.4248	2.87617	0.113846
		Sweeteners, other	0.58	0.0064	0.00078	2.80388	0.0310497	0.00378886	21.5529	0.238673	0.0291242
		Honey	0.58	0.0064	0.00078	0.121405	0.00134442	0.000164054	0.933217	0.0103343	0.00126105
		Cocoa beans	11.13	0.12	0.015	0.222678	0.00246589	0.000300902	1.71168	0.0189548	0.00231297
		Pepper	7.23	0.08	0.0098	0.505813	0.00560129	0.000683501	3.88808	0.0430559	0.00525393
		Pimento	7.23	0.08	0.0098	3.46843	0.0384088	0.00468686	26.6611	0.295241	0.0360269
		Cloves	7.23	0.08	0.0098	0.072259	0.000800184	9.7643e-05	0.55544	0.00615085	0.000750561
		Spices, other	7.23	0.08	0.0098	6.14202	0.0680156	0.00829965	47.2124	0.522822	0.0637977
		Infant food	0.68	0.063	0.0018	0.0615713	0.00564654	0.000159581	0.473286	0.0434038	0.00122667
		Miscellaneous	4.08	0.045	0.0055	3.01772	0.0334177	0.00407781	23.1966	0.256875	0.0313453

## Sheet: Global Projections
Population Projection	Year	Tg gas/yr from food consumption
		CO2	CH4	N2O
Sustainability (SSP1)	2020	1500	240	7
	2030	1600	250	7
	2040	1700	260	8
	2050	1700	270	8
	2060	1700	270	8
	2070	1700	260	7
	2080	1600	250	7
	2090	1500	240	7
	2100	1400	220	6
Middle of the Road (SSP2)	2020	1500	240	7
	2030	1700	260	7
	2040	1800	280	8
	2050	1900	290	8
	2060	1900	300	8
	2070	1900	300	9
	2080	1900	300	8
	2090	1900	290	8
	2100	1800	290	8
Regional Rivalry (SSP3)	2020	1600	240	7
	2030	1700	270	8
	2040	1900	290	8
	2050	2000	320	9
	2060	2100	340	10
	2070	2300	350	10
	2080	2400	370	11
	2090	2500	390	11
	2100	2600	400	11
Inequality (SSP4)	2020	1500	240	7
	2030	1700	260	7
	2040	1800	280	8
	2050	1800	290	8
	2060	1900	300	8
	2070	1900	300	9
	2080	1900	300	9
	2090	1900	300	8
	2100	1900	290	8
Fossil Fueled Development (SSP5)	2020	1500	240	7
	2030	1600	250	7
	2040	1700	270	8
	2050	1700	270	8
	2060	1700	270	8
	2070	1700	270	8
	2080	1700	260	7
	2090	1600	250	7
	2100	1500	230	7

## Sheet: Country Summaries
Country Name	Dietary Emissions
	kg gas/capita/yr			Tg gas/yr
	CO2	CH4	N2O	CO2	CH4	N2O
Afghanistan	322.117	12.8949	0.757344	12.254	0.490546	0.0288109
Albania	1058.03	53.011	2.50007	40.2497	2.01665	0.0951077
Algeria	623.122	18.9024	1.41839	26.8273	0.813806	0.0610661
Angola	628.91	10.0049	0.787642	20.0151	0.318406	0.0250667
Antigua and Barbuda	922.465	19.5681	1.47695	0.0894791	0.00189811	0.000143264
Argentina	1099.45	90.1179	3.01951	49.2343	4.03557	0.135217
Armenia	843.639	47.641	2.16865	2.49549	0.140922	0.00641487
Australia	1346.26	66.8567	2.97414	33.9298	1.68499	0.0749572
Austria	1069.16	45.6555	2.24365	3.16257	0.135049	0.00663673
Azerbaijan	731.861	35.2151	1.75184	7.35374	0.353841	0.0176025
Bahamas	890.62	21.453	1.59007	0.346451	0.00834523	0.000618539
Bangladesh	453.152	34.1687	0.642768	73.8846	5.57108	0.104801
Barbados	952.268	27.2604	1.6947	0.273301	0.00782375	0.00048638
Belarus	975.897	35.2787	2.02796	9.22418	0.333454	0.0191683
Belgium	937.207	33.0912	1.82845	10.8144	0.38184	0.0210985
Belize	669.757	16.5512	1.13296	0.261205	0.00645497	0.000441855
Benin	645.303	17.6059	0.863918	7.61522	0.207767	0.0101951
Bolivia (Plurinational State of)	699.097	42.3224	1.73038	8.0487	0.487258	0.0199218
Bosnia and Herzegovina	960.228	36.2335	1.98831	3.16971	0.119607	0.00656342
Botswana	565.029	23.3193	1.11526	1.30183	0.0537276	0.00256955
Brazil	1079.48	68.7399	2.58641	227.824	14.5076	0.545862
Bulgaria	875.81	23.5713	1.68195	6.13067	0.164999	0.0117737
Burkina Faso	593.132	14.5658	0.888028	12.053	0.295992	0.0180456
Burundi	378.411	3.49438	0.375703	4.3633	0.0402922	0.00433207
Cabo Verde	614.607	19.459	1.01457	0.338034	0.0107024	0.000558014
Cambodia	510.836	34.7962	0.670475	8.42216	0.573685	0.0110541
Cameroon	650.518	12.133	0.870498	16.8328	0.313954	0.022525
Canada	1114.58	55.0786	2.51891	41.6976	2.06054	0.094235
Central African Republic	527.734	33.3789	1.15983	2.5041	0.158383	0.00550341
Chad	324.62	14.701	0.703357	5.17671	0.234437	0.0112164
Chile	831.008	41.1861	1.8605	15.7493	0.780559	0.0352603
China	942.064	30.228	1.611	1380.72	44.3032	2.36113
Colombia	811.869	40.6188	1.70639	40.8687	2.04471	0.0858977
Comoros	661.18	23.047	1.00994	0.562664	0.019613	0.000859463
Congo	715.535	11.5811	0.95994	3.85029	0.0623182	0.00516544
Costa Rica	769.503	40.3648	1.64799	3.88445	0.203761	0.00831907
Côte d'Ivoire	581.946	15.7471	0.729148	14.9659	0.404969	0.0187515
Croatia	1074.13	42.8655	2.14988	4.43616	0.177034	0.00887899
Cuba	789.76	29.4094	1.52687	8.95035	0.333297	0.0173041
Cyprus	931.855	26.7055	1.77481	1.11729	0.0320199	0.00212799
Czechia	972.074	33.3507	1.81293	10.3905	0.356485	0.0193784
Democratic People's Republic of Korea	381.423	15.5068	0.54629	9.7896	0.397998	0.0140211
Democratic Republic of the Congo	466.685	3.34448	0.420171	40.5041	0.29027	0.0364671
Denmark	1137.36	57.9912	2.44406	6.56484	0.334725	0.0141071
Djibouti	455.725	20.7332	0.968795	0.443876	0.0201941	0.000943607
Dominica	872.798	22.8229	1.60161	0.0628415	0.00164325	0.000115316
Dominican Republic	809.95	27.3975	1.49661	8.69806	0.294222	0.0160721
Ecuador	669.565	34.2493	1.38235	11.633	0.595047	0.024017
Egypt	753.543	26.2289	1.54447	75.6467	2.63306	0.155046
El Salvador	620.619	20.4935	1.33186	4.00547	0.132265	0.0085958
Estonia	983.82	41.1992	2.08134	1.30454	0.0546302	0.00275986
Eswatini	526.532	29.7977	1.07882	0.604459	0.0342078	0.00123849
Ethiopia	325.766	9.42263	0.671518	36.5116	1.05608	0.0752631
Fiji	796.161	19.0656	1.31713	0.708583	0.0169684	0.00117224
Finland	1186.21	61.7023	2.68687	6.56212	0.341337	0.0148638
France	1110.65	51.1735	2.37678	72.3366	3.33293	0.1548
French Polynesia	1065.43	38.4515	1.93755	0.297255	0.010728	0.000540575
Gabon	823.368	19.8394	1.27624	1.78918	0.0431109	0.00277327
Gambia	466.479	16.3672	0.660749	1.09529	0.0384301	0.00155144
Georgia	646.945	24.3394	1.43811	2.58584	0.0972846	0.00574812
Germany	964.731	40.8114	2.02555	80.5714	3.40845	0.169168
Ghana	709.822	8.70061	0.848997	21.5914	0.264655	0.0258248
Greece	1133.73	49.5278	2.37804	11.8735	0.518705	0.0249053
Grenada	824.882	12.904	1.4504	0.0923868	0.00144524	0.000162445
Guatemala	474.37	20.4657	1.1064	8.33989	0.359807	0.0194515
Guinea	568.996	32.6217	0.88346	7.26665	0.416612	0.0112827
Guinea-Bissau	413.349	24.3423	0.640193	0.794044	0.0467616	0.00122981
Guyana	862.085	25.88	1.3917	0.675013	0.020264	0.0010897
Haiti	431.675	15.3333	0.737688	4.86196	0.172699	0.00830858
Honduras	541.373	19.8484	1.109	5.27622	0.193443	0.0108084
Hungary	853.876	27.6317	1.70977	8.26979	0.267613	0.0165592
Iceland	1469.83	56.6021	2.77298	0.498273	0.0191881	0.000940039
India	467.112	22.8938	0.852973	638.27	31.2825	1.16552
Indonesia	620.748	28.3542	0.814269	167.991	7.67338	0.220362
Iran (Islamic Republic of)	654.696	18.1111	1.41024	54.2834	1.50166	0.116929
Iraq	444.279	14.5477	0.946146	14.9798	0.490504	0.0319012
Ireland	1235.66	64.5529	2.60869	6.0325	0.315147	0.0127356
Israel	1079.49	56.4545	2.68686	9.19616	0.480936	0.0228893
Italy	987.92	24.821	2.29696	68.8923	2.75373	0.139081
Jamaica	792.976	20.0247	1.45447	2.33769	0.0590328	0.00428777
Japan	830.514	29.6419	1.40144	105.359	3.76038	0.177786
Jordan	553.671	16.9302	1.2422	5.59318	0.171028	0.0125488
Kazakhstan	943.713	63.3966	2.43777	17.5068	1.17607	0.0452231
Kenya	484.839	25.2223	0.986924	25.4899	1.32604	0.0518865
Kiribati	704.64	13.1624	0.775242	0.0831475	0.00155316	9.14785e-05
Kuwait	847.236	30.36	1.92398	3.56432	0.127725	0.00809417
Kyrgyzstan	674.867	42.1109	1.73919	4.32994	0.270184	0.0111586
Lao People's Democratic Republic	907.69	40.3716	1.58047	6.50723	0.289424	0.0113304
Latvia	987.92	30.1003	1.8394	1.88396	0.0574014	0.00350773
Lebanon	587.705	22.0935	1.31785	4.02931	0.151473	0.00903521
Lesotho	466.611	19.1138	0.951152	0.991547	0.0406169	0.0020212
Liberia	449.047	15.4707	0.603515	2.21695	0.0763787	0.00297955
Libya	712.363	16.2206	1.49283	4.82769	0.109927	0.0101169
Lithuania	1043.49	24.821	1.88037	2.88004	0.0685059	0.00518981
Luxembourg	1343.34	48.9595	2.82187	0.827494	0.030159	0.00173827
Madagascar	419.935	28.894	0.656806	11.3252	0.779243	0.0177134
Malawi	499.242	7.33449	0.772326	9.30038	0.136634	0.0143877
Malaysia	790.963	24.7492	1.23671	25.2713	0.790738	0.0395128
Maldives	803.917	24.4042	1.10255	0.42688	0.0129586	0.000585455
Mali	588.748	30.9217	1.20032	11.5736	0.60786	0.0235958
Malta	996.263	39.4699	2.02937	0.438356	0.0173667	0.000892921
Mauritania	615.811	34.337	1.39122	2.78716	0.155409	0.00629666
Mauritius	734.775	20.2598	1.32405	0.933164	0.02573	0.00168155
Mexico	844.166	33.3563	1.77813	107.695	4.25547	0.226846
Mongolia	997.658	74.4147	2.8127	3.21745	0.239987	0.00907096
Montenegro	1208.14	57.1231	2.60936	0.758714	0.0358733	0.00163868
Morocco	682.802	16.8659	1.42514	24.9032	0.615134	0.0519778
Mozambique	414.484	7.021	0.519911	12.5862	0.2132	0.0157876
Myanmar	775.364	40.862	1.419	41.9045	2.20839	0.0766901
Namibia	577.009	19.108	1.04429	1.43964	0.0476745	0.0026055
Nepal	621.973	32.4455	1.11688	17.794	0.928233	0.0319527
Netherlands	962.08	51.3237	2.06899	16.4487	0.877481	0.0353736
New Caledonia	877.486	34.1687	1.70082	0.248329	0.00966973	0.000481333
New Zealand	1114.02	51.533	2.50528	5.32836	0.246482	0.0119827
Nicaragua	509.388	18.6055	0.891495	3.33445	0.121791	0.00583573
Niger	427.786	13.1867	0.820732	9.97213	0.307395	0.0191321
Nigeria	474.459	9.29464	0.688224	95.3492	1.86789	0.138308
North Macedonia	794.991	24.7503	1.68506	1.65597	0.0515549	0.00350998
Norway	1306.37	48.3578	2.54541	7.02697	0.260116	0.0136917
Oman	755.489	32.5339	1.59985	3.75856	0.161856	0.00795924
Pakistan	451.306	30.874	1.15554	97.737	6.68624	0.250249
Panama	828.487	42.1645	1.5211	3.51775	0.17903	0.00645858
Papua New Guinea	664.246	10.1338	0.985277	5.82942	0.0889344	0.00864679
Paraguay	906.96	37.0731	1.72853	6.38953	0.26118	0.0121775
Peru	677.237	21.8975	1.14342	22.017	0.711889	0.0371725
Philippines	682.439	30.4315	1.06465	73.7833	3.29016	0.115107
Poland	923.84	22.4739	1.71571	35.0024	0.851491	0.0650047
Portugal	1266.14	46.035	2.37339	12.9475	0.470754	0.0242703
Republic of Korea	1073.56	41.8775	1.6806	54.9931	2.14517	0.0860889
Republic of Moldova	595.914	14.674	1.10544	2.40928	0.059327	0.00446929
Romania	1061.18	35.4353	2.15182	20.5498	0.686205	0.0416701
Russian Federation	968.65	36.6808	2.04259	141.299	5.3507	0.297957
Rwanda	452.012	8.33304	0.627945	5.70756	0.105221	0.00792906
Saint Kitts and Nevis	861.815	20.4926	1.42554	0.0456762	0.00108611	7.55536e-05
Saint Lucia	906.359	19.37	1.57781	0.165864	0.00354471	0.000288739
Saint Vincent and the Grenadines	1052.42	25.0148	1.97362	0.116818	0.00277664	0.000219072
Samoa	1076.73	25.3782	1.83619	0.212115	0.0049995	0.00036173
Sao Tome and Principe	583.739	8.25877	0.776256	0.125504	0.00177564	0.000166895
Saudi Arabia	659.056	21.3333	1.36167	22.5852	0.731072	0.0466631
Senegal	525.218	23.9207	0.871047	8.55895	0.389812	0.0141946
Serbia	783.018	25.0991	1.61458	6.86863	0.220169	0.0141631
Seychelles	1017.15	22.7678	1.48624	0.0996806	0.00223124	0.000145652
Sierra Leone	560.961	20.3299	0.59633	4.38279	0.158838	0.00465913
Slovakia	775.606	27.3842	1.57711	4.23248	0.149435	0.0086063
Slovenia	922.681	36.8485	1.93986	1.91825	0.076608	0.00403298
Solomon Islands	504.826	14.5687	0.632432	0.338234	0.00976103	0.00042373
South Africa	700.733	33.1301	1.54859	41.0335	1.94003	0.0906823
Spain	1216.12	39.1774	2.19862	56.8379	1.83103	0.102757
Sri Lanka	561.421	22.8345	0.706938	11.9717	0.486922	0.0150747
Sudan	487.006	24.4897	1.19735	20.8502	1.04848	0.0512619
Suriname	654.158	21.2439	1.04461	0.380066	0.0123427	0.000606921
Sweden	1011.93	50.6266	2.24561	10.1557	0.508089	0.0225369
Switzerland	1026.86	53.9425	2.32594	8.82178	0.46342	0.0199821
Syrian Arab Republic	569.018	0.0339149	0.0666352	9.71314	0.32942	0.021951
Tajikistan	418.11	16.6766	0.980417	3.8972	0.155443	0.00913846
Thailand	791.237	25.6884	1.06368	55.0907	1.78858	0.0740596
Timor-Leste	482.479	17.2217	0.711363	0.623846	0.0222677	0.000919792
Togo	443.438	6.31688	0.631901	3.58387	0.051053	0.00510703
Trinidad and Tobago	715.461	15.5555	1.38905	0.998068	0.0216999	0.00193772
Tunisia	746.117	20.3084	1.63638	8.72584	0.237507	0.0191374
Turkey	857.638	39.0409	2.03872	71.5527	3.25718	0.17009
Turkmenistan	718.364	58.9011	2.14843	4.26852	0.34999	0.012766
Uganda	497.022	10.7696	0.751826	22.0032	0.476769	0.0332834
Ukraine	790.006	26.4173	1.70556	34.7555	1.1622	0.0750345
United Arab Emirates	787.696	35.3511	1.77325	7.6962	0.345399	0.0173256
United Kingdom of Great Britain and Northern Ireland	1017.08	48.1511	2.22213	68.6832	3.25165	0.150061
United Republic of Tanzania	513.446	19.2617	0.800807	29.7825	1.11728	0.0464508
United States of America	1251.11	74.1569	2.9869	411.695	24.4024	0.982883
Uruguay	879.905	54.6802	2.04666	3.04623	0.189303	0.00708554
Uzbekistan	782.987	56.4662	2.14959	25.8245	1.86237	0.0708978
Vanuatu	653.9	22.8022	1.07904	0.19617	0.00684065	0.000323711
Venezuela (Bolivarian Republic of)	595.343	36.0204	1.28528	16.9768	1.02716	0.0366511
Viet Nam	927.723	44.6509	1.48745	89.4901	4.30712	0.143482
Yemen	345.363	13.0684	0.758664	10.0715	0.3811	0.0221242
Zambia	467.697	17.9815	0.805092	8.35353	0.321167	0.0143797
Zimbabwe	320.685	14.4044	0.635714	4.69644	0.210953	0.00931003

## Sheet: Europe
Country	Food Group		Food Item	Consumption (kg food/capita/yr)	Caloric Consumption (kcal/capita/yr)	Protein Consumption (g/capita/day)	Fat Consumption (g/capita/day)	Greenhouse Gas Emissions (kg CO2e/kg)	Consumption Emissions (kg CO2e/capita/yr)	Food Group Consumption Emissions (kg CO2e/capita/yr)	Percent by Component Gas			Greenhouse Gas Emissions (kg CO2e/capita/yr)			Greenhouse Gas Emissions (kg gas/capita/yr)			Food Group Emission (kg gas/capita/yr)			Population (Year 2019)	Sum of Dietary Emissions (kg gas/yr)
														CO2	CH4	N2O	CO2	CH4	N2O	CO2	CH4	N2O		CO2	CH4	N2O
Albania	Grain products (non-rice)		Wheat	134.78	1036	32.96	5.81	1.4	188.692	209.259	57.9	1.8	40.3	109.253	3.39646	76.0429	109.253	0.135858	0.255177	120.85	0.151384	0.283974	38042000	4.02497e+10	2.01665e+09	9.51077e+07
			Barley	12.7	1	0.03	0	1.313	16.6751		54.569	1.91155	43.5195	9.09943	0.318753	7.25692	9.09943	0.0127501	0.0243521
			Maize	0.14	17	0.4	0.06	0.988	0.13832		71.9	2.05597	26.1	0.0994521	0.00284382	0.0361015	0.0994521	0.000113753	0.000121146
			Millet	2.3	0	0	0	1.313	3.0199		61.8	1.8	36.4	1.8663	0.0543582	1.09924	1.8663	0.00217433	0.00368874
			Rye	0.49	4	0.09	0.01	1.4	0.686		73.3007	1.65211	25.0472	0.502843	0.0113335	0.171824	0.502843	0.00045334	0.00057659
			Oats	0.03	0	0.01	0	1.575	0.04725		61.8	1.8	36.4	0.0292005	0.0008505	0.017199	0.0292005	3.402e-05	5.77148e-05
			Sorghum	0	0	0	0	1.313	0		61.8	1.8	36.4	0	0	0	0	0	0
			Cereals, other	0	0	0	0	1.313	0		61.8	1.8	36.4	0	0	0	0	0	0
	Rice		Rice (milled equivalent)	0	70	1.37	0.12	3.839	0	0	22.2	71.8	6	0	0	0	0	0	0	0	0	0
	Fruit		Oranges, mandarines	17.26	16	0.29	0.05	0.317	5.47142	134.767	56.9055	1.22138	41.8731	3.11354	0.0668268	2.29106	3.11354	0.00267307	0.00768811	92.9382	0.128762	0.129564
			Lemons, limes	2.56	1	0.04	0.01	0.317	0.81152		56.3759	0	43.6241	0.457502	0	0.354018	0.457502	0	0.00118798
			Grapefruit	0.04	0	0	0	0.317	0.01268		68.8513	2.47131	28.6774	0.00873034	0.000313362	0.0036363	0.00873034	1.25345e-05	1.22023e-05
			Citrus, other	0.02	0	0	0	0.317	0.00634		68.8513	2.47131	28.6774	0.00436517	0.000156681	0.00181815	0.00436517	6.26723e-06	6.10117e-06
			Bananas	6.44	11	0.12	0.05	0.678	4.36632		79.4125	3.10136	17.4861	3.4674	0.135415	0.7635	3.4674	0.0054166	0.00256208
			Plantains	0	0	0	0	0.6632	0		68.8513	2.47131	28.6774	0	0	0	0	0	0
			Apples	34.5	46	0.28	0.38	0.357	12.3165		72.4477	2.06109	25.4912	8.92303	0.253855	3.13962	8.92303	0.0101542	0.0105356
			Pineapples	0.07	0	0	0	0.6632	0.046424		68.8513	2.47131	28.6774	0.0319635	0.00114728	0.0133132	0.0319635	4.58912e-05	4.46752e-05
			Dates	4.21	18	0.17	0.05	0.6632	2.79207		68.8513	2.47131	28.6774	1.92238	0.0690006	0.800694	1.92238	0.00276003	0.00268689
			Grapes (excluding wine)	57.25	102	1.1	0.47	1.214	69.5015		68.8513	2.47131	28.6774	47.8527	1.71759	19.9312	47.8527	0.0687038	0.0668833
			Fruits, other	52.59	79	1.15	0.54	0.75	39.4425		68.8513	2.47131	28.6774	27.1567	0.974745	11.3111	27.1567	0.0389898	0.0379567
	Vegetables		Cassava	0	0	0	0	0.987	0	229.538	83.6105	0.362596	16.0269	0	0	0	0	0	0	139.279	0.296967	0.27797
			Potatoes	47.75	90	2.22	0.13	0.37	17.6675		59.711	1.6649	38.6241	10.5494	0.294147	6.82392	10.5494	0.0117659	0.0228991
			Sweet potatoes	0	0	0	0	0.365	0		65.672	2.57696	31.751	0	0	0	0	0	0
			Yams	0	0	0	0	0.365	0		65.672	2.57696	31.751	0	0	0	0	0	0
			Roots, other	0	0	0	0	0.365	0		65.672	2.57696	31.751	0	0	0	0	0	0
			Tomatoes	68.89	34	1.6	0.4	1.427	98.306		53.5199	4.20609	42.274	52.6133	4.13484	41.5579	52.6133	0.165393	0.139456
			Onions	31.92	27	0.96	0.17	0.395	12.6084		71.3251	1.22109	27.4538	8.99295	0.15396	3.46149	8.99295	0.00615841	0.0116157
			Vegetables, other	196.81	123	5.16	0.95	0.455	89.5486		65.672	2.57696	31.751	58.8083	2.30763	28.4326	58.8083	0.0923053	0.0954113
			Aquatic plants	0	0	0	0	0	0		65.672	2.57696	31.751	0	0	0	0	0	0
			Beans	5.66	52	3.27	0.25	1.61	9.1126		75.1226	5.04344	19.834	6.84562	0.459589	1.80739	6.84562	0.0183835	0.00606508
			Peas	0	0	0	0	0.896	0		66.4257	5.15877	28.4155	0	0	0	0	0	0
			Pulses, other	0.39	4	0.24	0.02	1.61	0.6279		65.672	2.57696	31.751	0.412355	0.0161808	0.199365	0.412355	0.00064723	0.000669009
			Nuts	4.38	31	0.72	2.43	0.278	1.21764		62.5618	3.79852	33.6397	0.761778	0.0462522	0.40961	0.761778	0.00185009	0.00137453
			Soybeans	0	0	0	0	1.8925	0		63.3478	1.20151	35.4507	0	0	0	0	0	0
			Groundnuts (shelled equivalents)	0.18	3	0.13	0.24	2.497	0.44946		65.672	2.57696	31.751	0.295169	0.0115824	0.142708	0.295169	0.000463297	0.000478886
	Rape and mustard oil	Ruminant	Bovine meat	13.38	60	5.57	4.07	42.8	572.664	838.787	10.5	73	16.5	60.1297	418.045	94.4896	60.1297	16.7218	0.317079	114.153	22.683	0.528728
			Mutton and goat meat	10.9	57	4.13	4.36	24.415	266.123		20.3	56	23.7	54.0231	149.029	63.0713	54.0231	5.96117	0.211649
		Non-ruminant	Pig meat	5.35	49	1.57	4.65	7.282	38.9587	230.942	47.5051	28.439	24.0559	18.5074	11.0795	9.37186	18.5074	0.443179	0.0314492	116.004	1.73136	0.24045
			Poultry meat	9.48	50	3.52	3.83	6.092	57.7522		53.86	5.83151	40.3085	31.1053	3.36783	23.279	31.1053	0.134713	0.0781175
			Meat, other	0	0	0	0	6.687	0		49.4604	21.4829	29.0567	0	0	0	0	0	0
			Offals, edible	4.99	15	2.19	0.63	26.9	134.231		49.4604	21.4829	29.0567	66.3912	28.8367	39.0031	66.3912	1.15347	0.130883
	Seafood		Freshwater fish	0.57	1	0.17	0.04	4.005	2.28285	39.7585	49.4604	21.4829	29.0567	1.12911	0.490422	0.663321	1.12911	0.0196169	0.00222591	36.0389	0.110882	0.0108404
			Demersal fish	2.08	2	0.49	0.05	4.005	8.3304		78.6427	5.32556	16.0317	6.55126	0.443641	1.3355	6.55126	0.0177456	0.00448156
			Pelagic fish	3.31	7	1.03	0.3	4.005	13.2566		91.6865	7.21239	1.10113	12.1545	0.956114	0.145972	12.1545	0.0382445	0.000489839
			Marine fish, other	0.45	1	0.14	0.03	4.005	1.80225		89.095	4.66193	6.24304	1.60572	0.0840197	0.112515	1.60572	0.00336079	0.000377568
			Crustaceans	1.36	2	0.41	0.02	7.3405	9.98308		89.095	4.66193	6.24304	8.89443	0.465404	0.623248	8.89443	0.0186162	0.00209144
			Cephalopods	0.72	2	0.3	0.03	7.3405	5.28516		89.095	4.66193	6.24304	4.70881	0.246391	0.329955	4.70881	0.00985562	0.00110723
			Molluscs, other	0.15	0	0.01	0	7.3405	1.10107		90.3737	7.81574	1.81055	0.995082	0.0860571	0.0199355	0.995082	0.00344229	6.68975e-05
			Aquatic animals, others	0	0	0	0	6.6476	0		89.095	4.66193	6.24304	0	0	0	0	0	0
	Dairy		Cream	0.01	0	0	0.01	2.781	0.02781	1145.11	24.1	56.7	19.2	0.00670221	0.0157683	0.00533952	0.00670221	0.000630731	1.79179e-05	255.444	26.8378	0.733961
			Butter, ghee	1.68	33	0.04	3.73	2.781	4.67208		24.1	56.7	19.2	1.12597	2.64907	0.897039	1.12597	0.105963	0.0030102
			Milk (excluding butter) *includes cheese	316.78	637	37.6	38.91	3.6	1140.41		22.3	58.6	19.1	254.311	668.279	217.818	254.311	26.7312	0.730933
	Eggs		Eggs	15.24	57	4.49	4.02	4.507	68.6867	68.6867	41.5	6.5	52	28.505	4.46463	35.7171	28.505	0.178585	0.119856	28.505	0.178585	0.119856
	Oils		Oilcrops, other	1.09	22	0.02	2.42	1.313	1.43117	74.678	61.4	13	25.6	0.878738	0.186052	0.36638	0.878738	0.00744208	0.00122946	56.3877	0.239677	0.0412639
			Soybean oil	0.18	4	0	0.5	6.117	1.10106		61.4	13	25.6	0.676051	0.143138	0.281871	0.676051	0.00572551	0.000945877
			Groundnut oil	0	0	0	0.01	5.752	0		61.4	13	25.6	0	0	0	0	0	0
			Sunflowerseed oil	6.4	155	0	17.52	3.607	23.0848		61.4	13	25.6	14.1741	3.00102	5.90971	14.1741	0.120041	0.0198312
			Rape and mustard oil	0	0	0	0	3.828	0		65.1	3.3	31.6	0	0	0	0	0	0
			Cottonseed oil	0	0	0	0	5.752	0		61.4	13	25.6	0	0	0	0	0	0
			Palmkernel oil	0	0	0	0	5.752	0		56.142	28.9894	14.8685	0	0	0	0	0	0
			Sesame seed oil	0	0	0	0	5.752	0		61.4	13	25.6	0	0	0	0	0	0
			Palm oil	0	0	0	0	7.605	0		61.4923	12.9177	25.59	0	0	0	0	0	0
			Coconut oil	0	0	0	0	5.752	0		61.4	13	25.6	0	0	0	0	0	0
			Olive Oil	3.59	87	0	9.85	5.944	21.339		89.1721	3.20831	7.61958	19.0284	0.68462	1.62594	19.0284	0.0273848	0.00545617
			Rice bran oil	0	0	0	0	5.752	0		61.4	13	25.6	0	0	0	0	0	0
			Maize germ oil	0.34	8	0	0.93	5.752	1.95568		61.4	13	25.6	1.20079	0.254238	0.500654	1.20079	0.0101695	0.00168005
			Oilcrops oil, other	0	0	0	0	5.752	0		61.4	13	25.6	0	0	0	0	0	0
			Fats, animals, raw	1.36	31	0.08	3.38	6.733	9.15688		61.4	13	25.6	5.62232	1.19039	2.34416	5.62232	0.0476158	0.00786631
			Fish, body oil	0	0	0	0	6.733	0		61.4	13	25.6	0	0	0	0	0	0
			Fish, liver oil	0	0	0	0	6.733	0		61.4	13	25.6	0	0	0	0	0	0
			Sunflower seed	0	0	0	0	1.313	0		61.4	13	25.6	0	0	0	0	0	0
			Rape and mustardseed	0	1	0	0	1.313	0		65.1	3.3	31.6	0	0	0	0	0	0
			Sesame seed	0	0	0	0	1.313	0		61.4923	12.9177	25.59	0	0	0	0	0	0
			Palm kernels	0	0	0	0	1.313	0		56.142	28.9894	14.8685	0	0	0	0	0	0
			Olives (including preserved)	12.64	38	0.38	3.84	1.313	16.5963		89.1721	3.20831	7.61958	14.7993	0.532461	1.26457	14.7993	0.0212984	0.00424352
			Coconuts (including copra)	0.01	0	0	0	1.313	0.01313		61.4923	12.9177	25.59	0.00807394	0	0.00335997	0.00807394	0	1.12751e-05
	Beverages		Coffee	2.65	3	0.46	0	16.477	43.664	88.1667	53.6	0	46.4	23.4039	0	20.2601	23.4039	0	0.067987	63.6629	0.0172708	0.0810738
			Wine	7.09	13	0	0	1.585	11.2376		79.6583	3.35563	17.7687	8.95172	0.377094	1.99679	8.95172	0.0150838	0.00670063
			Beer	28.21	38	0.39	0	1.109	31.2849		95	0	5	29.7206	0	1.56424	29.7206	0	0.00524914
			Beverages, fermented	0	0	0	0	1.347	0		82	3	15	0	0	0	0	0	0
			Beverages, alcoholic	1.2	10	0	0	1.347	1.6164		82	3	15	1.32545	0.048492	0.24246	1.32545	0.00193968	0.000813624
			Tea (including mate)	0.03	0	0	0	12.124	0.36372		71.8	1.7	26.5	0.261151	0.00618324	0.0963858	0.261151	0.00024733	0.000323442
	Other		Sugar cane	0	0	0	0	2.672	0	66.2201	74.1	1.1	24.8	0	0	0	0	0	0	34.7722	0.635418	0.0523911
			Sugar (non-centrifugal)	0	0	0	0	0.97	0		59.6	16.5	24	0	0	0	0	0	0
			Sugar beet	0	0	0	0	1.536	0		59.6	16.5	24	0	0	0	0	0	0
			Sugar (raw equivalent)	16.49	160	0	0	0.97	15.9953		30.4914	47.2261	22.2824	4.87719	7.55396	3.56414	4.87719	0.302159	0.0119602
			Sweeteners, other	19.09	22	0	0	0.97	18.5173		59.6	16.5	24	11.0363	3.05535	4.44415	11.0363	0.122214	0.0149133
			Honey	1.3	11	0.01	0	0.97	1.261		59.6	16.5	24	0.751556	0.208065	0.30264	0.751556	0.0083226	0.00101557
			Cocoa beans	0	14	0.16	1.3	18.681	0		59.6	16.5	24	0	0	0	0	0	0
			Pepper	0.01	0	0	0	12.124	0.12124		59.6	16.5	24	0.072259	0.0200046	0.0290976	0.072259	0.000800184	9.7643e-05
			Pimento	0.01	0	0	0	12.124	0.12124		59.6	16.5	24	0.072259	0.0200046	0.0290976	0.072259	0.000800184	9.7643e-05
			Cloves	0	0	0	0	12.124	0		59.6	16.5	24	0	0	0	0	0	0
			Spices, other	0.14	1	0.04	0.06	12.124	1.69736		59.6	16.5	24	1.01163	0.280064	0.407366	1.01163	0.0112026	0.001367
			Infant food	0.04	0	0.02	0	2.781	0.11124		24.6	56.4	19	0.027365	0.0627394	0.0211356	0.027365	0.00250957	7.09248e-05
			Miscellaneous	4.15	5	0.14	0.06	6.84227	28.3954		59.6	16.5	24	16.9237	4.68525	6.8149	16.9237	0.18741	0.0228688
Armenia	Grain products (non-rice)		Wheat	144.9	1151	34.25	4.4	1.4	202.86	208.387	57.9	1.8	40.3	117.456	3.65148	81.7526	117.456	0.146059	0.274338	120.835	0.150086	0.281207	2958000	2.49549e+09	1.40922e+08	6.41487e+06
			Barley	0.7	6	0.2	0.03	1.313	0.9191		54.569	1.91155	43.5195	0.501543	0.0175691	0.399988	0.501543	0.000702763	0.00134224
			Maize	0.14	1	0.03	0	0.988	0.13832		71.9	2.05597	26.1	0.0994521	0.00284382	0.0361015	0.0994521	0.000113753	0.000121146
			Millet	0	0	0	0	1.313	0		61.8	1.8	36.4	0	0	0	0	0	0
			Rye	0.1	1	0.03	0	1.4	0.14		73.3007	1.65211	25.0472	0.102621	0.00231296	0.0350661	0.102621	9.25184e-05	0.000117671
			Oats	0.59	6	0.23	0.11	1.575	0.92925		61.8	1.8	36.4	0.574276	0.0167265	0.338247	0.574276	0.00066906	0.00113506
			Sorghum	0	0	0	0	1.313	0		61.8	1.8	36.4	0	0	0	0	0	0
			Cereals, other	2.59	23	0.63	0.07	1.313	3.40067		61.8	1.8	36.4	2.10161	0.0612121	1.23784	2.10161	0.00244848	0.00415384
	Rice		Rice (milled equivalent)	3.29	32	0.6	0.07	3.839	12.6303	12.6303	22.2	71.8	6	2.80393	9.06856	0.757819	2.80393	0.362743	0.00254302	2.80393	0.362743	0.00254302
	Fruit		Oranges, mandarines	5.82	5	0.1	0.02	0.317	1.84494	80.1944	56.9055	1.22138	41.8731	1.04987	0.0225337	0.772534	1.04987	0.000901348	0.0025924	55.6867	0.0785156	0.0756537
			Lemons, limes	0.94	0	0.02	0.01	0.317	0.29798		56.3759	0	43.6241	0.167989	0	0.129991	0.167989	0	0.000436211
			Grapefruit	0.55	0	0	0	0.317	0.17435		68.8513	2.47131	28.6774	0.120042	0.00430872	0.0499991	0.120042	0.000172349	0.000167782
			Citrus, other	0.03	0	0	0	0.317	0.00951		68.8513	2.47131	28.6774	0.00654776	0.000235021	0.00272722	0.00654776	9.40085e-06	9.15175e-06
			Bananas	7.61	13	0.15	0.06	0.678	5.15958		79.4125	3.10136	17.4861	4.09735	0.160017	0.902211	4.09735	0.00640068	0.00302755
			Plantains	0	0	0	0	0.6632	0		68.8513	2.47131	28.6774	0	0	0	0	0	0
			Apples	14.37	19	0.05	0.11	0.357	5.13009		72.4477	2.06109	25.4912	3.71663	0.105736	1.30772	3.71663	0.00422944	0.00438832
			Pineapples	0.28	0	0	0	0.6632	0.185696		68.8513	2.47131	28.6774	0.127854	0.00458912	0.0532528	0.127854	0.000183565	0.000178701
			Dates	0.25	1	0.01	0	0.6632	0.1658		68.8513	2.47131	28.6774	0.114155	0.00409743	0.0475472	0.114155	0.000163897	0.000159554
			Grapes (excluding wine)	13.57	19	0.19	0.13	1.214	16.474		68.8513	2.47131	28.6774	11.3425	0.407122	4.72431	11.3425	0.0162849	0.0158534
			Fruits, other	67.67	84	1.72	0.71	0.75	50.7525		68.8513	2.47131	28.6774	34.9437	1.25425	14.5545	34.9437	0.05017	0.0488406
	Vegetables		Cassava	0	0	0	0	0.987	0	150.462	83.6105	0.362596	16.0269	0	0	0	0	0	0	92.5259	0.181759	0.179169
			Potatoes	34.19	64	1.5	0.09	0.37	12.6503		59.711	1.6649	38.6241	7.55362	0.210615	4.88607	7.55362	0.0084246	0.0163962
			Sweet potatoes	0	0	0	0	0.365	0		65.672	2.57696	31.751	0	0	0	0	0	0
			Yams	0	0	0	0	0.365	0		65.672	2.57696	31.751	0	0	0	0	0	0
			Roots, other	0	0	0	0	0.365	0		65.672	2.57696	31.751	0	0	0	0	0	0
			Tomatoes	34.74	16	0.77	0.19	1.427	49.574		53.5199	4.20609	42.274	26.532	2.08512	20.9569	26.532	0.083405	0.0703251
			Onions	14.63	12	0.44	0.08	0.395	5.77885		71.3251	1.22109	27.4538	4.12177	0.0705651	1.58652	4.12177	0.0028226	0.00532388
			Vegetables, other	171.12	102	4.67	0.83	0.455	77.8596		65.672	2.57696	31.751	51.132	2.00641	24.7212	51.132	0.0802565	0.0829571
			Aquatic plants	0	0	0	0	0	0		65.672	2.57696	31.751	0	0	0	0	0	0
			Beans	1.19	11	0.72	0.06	1.61	1.9159		75.1226	5.04344	19.834	1.43927	0.0966273	0.38	1.43927	0.00386509	0.00127517
			Peas	0	0	0	0	0.896	0		66.4257	5.15877	28.4155	0	0	0	0	0	0
			Pulses, other	0.96	9	0.63	0.05	1.61	1.5456		65.672	2.57696	31.751	1.01503	0.0398295	0.490744	1.01503	0.00159318	0.00164679
			Nuts	1.69	14	0.32	1.38	0.278	0.46982		62.5618	3.79852	33.6397	0.293928	0.0178462	0.158046	0.293928	0.000713847	0.000530355
			Soybeans	0.01	0	0	0	1.8925	0.018925		63.3478	1.20151	35.4507	0.0119886	0.000227385	0.00670904	0.0119886	9.0954e-06	2.25136e-05
			Groundnuts (shelled equivalents)	0.26	4	0.18	0.34	2.497	0.64922		65.672	2.57696	31.751	0.426356	0.0167302	0.206134	0.426356	0.000669206	0.000691725
	Meat	Ruminant	Bovine meat	18.32	110	7.54	8.58	42.8	784.096	854.899	10.5	73	16.5	82.3301	572.39	129.376	82.3301	22.8956	0.434147	96.7032	24.4816	0.490457
			Mutton and goat meat	2.9	21	1.07	1.8	24.415	70.8035		20.3	56	23.7	14.3731	39.65	16.7804	14.3731	1.586	0.0563102
		Non-ruminant	Pig meat	6.28	54	2.02	4.98	7.282	45.731	291.408	47.5051	28.439	24.0559	21.7245	13.0055	11.001	21.7245	0.520218	0.0369161	147.303	2.05279	0.311359
			Poultry meat	15.17	51	5.13	3.2	6.092	92.4156		53.86	5.83151	40.3085	49.7751	5.38923	37.2514	49.7751	0.215569	0.125005
			Meat, other	0.03	0	0.03	0.01	6.687	0.20061		49.4604	21.4829	29.0567	0.0992226	0.0430968	0.0582906	0.0992226	0.00172387	0.000195606
			Offals, edible	5.69	17	2.78	0.49	26.9	153.061		49.4604	21.4829	29.0567	75.7046	32.8819	44.4745	75.7046	1.31528	0.149243
	Seafood		Freshwater fish	4.36	8	1.3	0.3	4.005	17.4618	7.14814	49.4604	21.4829	29.0567	8.63668	3.7513	5.07382	8.63668	0.150052	0.0170262	15.0284	0.166913	0.01815
			Demersal fish	0.14	0	0.04	0.01	4.005	0.5607		78.6427	5.32556	16.0317	0.44095	0.0298604	0.0898897	0.44095	0.00119442	0.000301643
			Pelagic fish	0.76	2	0.22	0.1	4.005	3.0438		91.6865	7.21239	1.10113	2.79075	0.219531	0.0335162	2.79075	0.00878123	0.000112471
			Marine fish, other	0.17	0	0.06	0.01	4.005	0.68085		89.095	4.66193	6.24304	0.606603	0.0317408	0.0425057	0.606603	0.00126963	0.000142637
			Crustaceans	0.35	0	0.09	0	7.3405	2.56917		89.095	4.66193	6.24304	2.28901	0.119773	0.160395	2.28901	0.00479093	0.000538237
			Cephalopods	0.01	0	0	0	7.3405	0.073405		89.095	4.66193	6.24304	0.0654002	0.00342209	0.0045827	0.0654002	0.000136884	1.53782e-05
			Molluscs, other	0.03	0	0	0	7.3405	0.220215		90.3737	7.81574	1.81055	0.199016	0.0172114	0.00398709	0.199016	0.000688457	1.33795e-05
			Aquatic animals, others	0	0	0	0	6.6476	0		89.095	4.66193	6.24304	0	0	0	0	0	0
	Dairy		Cream	0.02	0	0	0.01	2.781	0.05562	807.241	24.1	56.7	19.2	0.0134044	0.0315365	0.010679	0.0134044	0.00126146	3.58357e-05	180.095	18.9183	0.517408
			Butter, ghee	1.59	31	0.04	3.54	2.781	4.42179		24.1	56.7	19.2	1.06565	2.50715	0.848984	1.06565	0.100286	0.00284894
			Milk (excluding butter) *includes cheese	222.99	378	21.36	22.44	3.6	802.764		22.3	58.6	19.1	179.016	470.42	153.328	179.016	18.8168	0.514523
	Eggs		Eggs	11.53	44	3.39	3.1	4.507	51.9657	51.9657	41.5	6.5	52	21.5658	3.37777	27.0222	21.5658	0.135111	0.0906784	21.5658	0.135111	0.0906784
	Oils		Oilcrops, other	0	0	0	0	1.313	0	42.879	61.4	13	25.6	0	0	0	0	0	0	26.7457	0.216872	0.0359279
			Soybean oil	0.21	5	0	0.58	6.117	1.28457		61.4	13	25.6	0.788726	0.166994	0.32885	0.788726	0.00667976	0.00110352
			Groundnut oil	0	0	0	0	5.752	0		61.4	13	25.6	0	0	0	0	0	0
			Sunflowerseed oil	6.87	166	0	18.82	3.607	24.7801		61.4	13	25.6	15.215	3.22141	6.3437	15.215	0.128856	0.0212876
			Rape and mustard oil	0	0	0	0	3.828	0		65.1	3.3	31.6	0	0	0	0	0	0
			Cottonseed oil	0	0	0	0	5.752	0		61.4	13	25.6	0	0	0	0	0	0
			Palmkernel oil	0	0	0	0	5.752	0		56.142	28.9894	14.8685	0	0	0	0	0	0
			Sesame seed oil	0	0	0	0.01	5.752	0		61.4	13	25.6	0	0	0	0	0	0
			Palm oil	0	0	0	0	7.605	0		61.4923	12.9177	25.59	0	0	0	0	0	0
			Coconut oil	0.2	5	0	0.54	5.752	1.1504		61.4	13	25.6	0.706346	0.149552	0.294502	0.706346	0.00598208	0.000988263
			Olive Oil	0.03	1	0	0.09	5.944	0.17832		89.1721	3.20831	7.61958	0.159012	0.00572106	0.0135872	0.159012	0.000228842	4.55948e-05
			Rice bran oil	0	0	0	0	5.752	0		61.4	13	25.6	0	0	0	0	0	0
			Maize germ oil	0.14	3	0	0.38	5.752	0.80528		61.4	13	25.6	0.494442	0.104686	0.206152	0.494442	0.00418746	0.000691784
			Oilcrops oil, other	2.28	45	0.04	5.09	5.752	13.1146		61.4	13	25.6	8.05234	1.70489	3.35733	8.05234	0.0681957	0.0112662
			Fats, animals, raw	0.02	0	0	0.01	6.733	0.13466		61.4	13	25.6	0.0826812	0.0175058	0.034473	0.0826812	0.000700232	0.000115681
			Fish, body oil	0	0	0	0	6.733	0		61.4	13	25.6	0	0	0	0	0	0
			Fish, liver oil	0	0	0	0	6.733	0		61.4	13	25.6	0	0	0	0	0	0
			Sunflower seed	0	0	0	0	1.313	0		61.4	13	25.6	0	0	0	0	0	0
			Rape and mustardseed	0	0	0	0	1.313	0		65.1	3.3	31.6	0	0	0	0	0	0
			Sesame seed	0.05	1	0.02	0.06	1.313	0.06565		61.4923	12.9177	25.59	0.0403697	0.00848047	0.0167998	0.0403697	0.000339219	5.63753e-05
			Palm kernels	0	0	0	0	1.313	0		56.142	28.9894	14.8685	0	0	0	0	0	0
			Olives (including preserved)	1.01	3	0.03	0.31	1.313	1.32613		89.1721	3.20831	7.61958	1.18254	0.0425463	0.101046	1.18254	0.00170185	0.000339079
			Coconuts (including copra)	0.03	0	0	0.05	1.313	0.03939		61.4923	12.9177	25.59	0.0242218	0	0.0100799	0.0242218	0	3.38252e-05
	Beverages		Coffee	3.76	5	0.67	0	16.477	61.9535	72.7204	53.6	0	46.4	33.2071	0	28.7464	33.2071	0	0.0964645	42.6747	0.00436668	0.100521
			Wine	1.51	3	0	0	1.585	2.39335		79.6583	3.35563	17.7687	1.9065	0.080312	0.425268	1.9065	0.00321248	0.00142707
			Beer	6.02	8	0.08	0	1.109	6.67618		95	0	5	6.34237	0	0.333809	6.34237	0	0.00112016
			Beverages, fermented	0	0	0	0	1.347	0		82	3	15	0	0	0	0	0	0
			Beverages, alcoholic	0	0	0	0	1.347	0		82	3	15	0	0	0	0	0	0
			Tea (including mate)	0.14	0	0.03	0	12.124	1.69736		71.8	1.7	26.5	1.2187	0.0288551	0.4498	1.2187	0.0011542	0.0015094
	Other		Sugar cane	0	0	0	0	2.672	0	83.4539	74.1	1.1	24.8	0	0	0	0	0	0	41.671	0.891891	0.0655754
			Sugar (non-centrifugal)	0	0	0	0	0.97	0		59.6	16.5	24	0	0	0	0	0	0
			Sugar beet	0	0	0	0	1.536	0		59.6	16.5	24	0	0	0	0	0	0
			Sugar (raw equivalent)	28.09	271	0	0	0.97	27.2473		30.4914	47.2261	22.2824	8.30809	12.8679	6.07136	8.30809	0.514714	0.0203737
			Sweeteners, other	23.28	36	0	0	0.97	22.5816		59.6	16.5	24	13.4586	3.72596	5.41958	13.4586	0.149039	0.0181865
			Honey	0.7	6	0.01	0	0.97	0.679		59.6	16.5	24	0.404684	0.112035	0.16296	0.404684	0.0044814	0.000546846
			Cocoa beans	0.49	40	0.47	3.63	18.681	9.15369		59.6	16.5	24	5.4556	1.51036	2.19689	5.4556	0.0604144	0.0073721
			Pepper	0.03	0	0.01	0	12.124	0.36372		59.6	16.5	24	0.216777	0.0600138	0.0872928	0.216777	0.00240055	0.000292929
			Pimento	0.07	1	0.02	0.03	12.124	0.84868		59.6	16.5	24	0.505813	0.140032	0.203683	0.505813	0.00560129	0.000683501
			Cloves	0	0	0	0	12.124	0		59.6	16.5	24	0	0	0	0	0	0
			Spices, other	0.03	0	0.01	0.01	12.124	0.36372		59.6	16.5	24	0.216777	0.0600138	0.0872928	0.216777	0.00240055	0.000292929
			Infant food	0.14	1	0.06	0.01	2.781	0.38934		24.6	56.4	19	0.0957776	0.219588	0.0739746	0.0957776	0.00878351	0.000248237
			Miscellaneous	3.19	4	0.1	0.04	6.84227	21.8269		59.6	16.5	24	13.0088	3.60143	5.23844	13.0088	0.144057	0.0175787
Austria	Grain products (non-rice)		Wheat	84.56	683	22.63	3.27	1.4	118.384	148.181	57.9	1.8	40.3	68.5443	2.13091	47.7088	68.5443	0.0852365	0.160096	89.5913	0.106996	0.187655	2958000	3.16257e+09	1.35049e+08	6.63673e+06
			Barley	0.31	2	0.06	0.01	1.313	0.40703		54.569	1.91155	43.5195	0.222112	0.00778059	0.177137	0.222112	0.000311224	0.000594421
			Maize	10.86	81	1.87	0.27	0.988	10.7297		71.9	2.05597	26.1	7.71464	0.220599	2.80045	7.71464	0.00882398	0.00939747
			Millet	0	0	0	0	1.313	0		61.8	1.8	36.4	0	0	0	0	0	0
			Rye	9.8	71	1.8	0.25	1.4	13.72		73.3007	1.65211	25.0472	10.0569	0.22667	3.43648	10.0569	0.0090668	0.0115318
			Oats	2.32	18	0.71	0.34	1.575	3.654		61.8	1.8	36.4	2.25817	0.065772	1.33006	2.25817	0.00263088	0.00446328
			Sorghum	0	0	0	0	1.313	0		61.8	1.8	36.4	0	0	0	0	0	0
			Cereals, other	0.98	10	0.27	0.03	1.313	1.28674		61.8	1.8	36.4	0.795205	0.0231613	0.468373	0.795205	0.000926453	0.00157172
	Rice		Rice (milled equivalent)	5.51	38	0.71	0.07	3.839	21.1529	21.1529	22.2	71.8	6	4.69594	15.1878	1.26917	4.69594	0.607511	0.00425897	4.69594	0.607511	0.00425897
	Fruit		Oranges, mandarines	10.03	14	0.24	0.04	0.317	3.17951	58.8618	56.9055	1.22138	41.8731	1.80932	0.0388339	1.33136	1.80932	0.00155335	0.00446765	41.2528	0.0552671	0.0544542
			Lemons, limes	4.62	2	0.05	0.04	0.317	1.46454		56.3759	0	43.6241	0.825648	0	0.638892	0.825648	0	0.00214393
			Grapefruit	0.44	0	0.01	0	0.317	0.13948		68.8513	2.47131	28.6774	0.0960338	0.00344698	0.0399993	0.0960338	0.000137879	0.000134226
			Citrus, other	0.08	0	0	0	0.317	0.02536		68.8513	2.47131	28.6774	0.0174607	0.000626723	0.00727259	0.0174607	2.50689e-05	2.44047e-05
			Bananas	12.05	20	0.26	0.03	0.678	8.1699		79.4125	3.10136	17.4861	6.48792	0.253378	1.4286	6.48792	0.0101351	0.00479396
			Plantains	0.01	0	0	0	0.6632	0.006632		68.8513	2.47131	28.6774	0.00456622	0.000163897	0.00190189	0.00456622	6.55588e-06	6.38217e-06
			Apples	33.13	41	0.22	0.27	0.357	11.8274		72.4477	2.06109	25.4912	8.56869	0.243774	3.01494	8.56869	0.00975096	0.0101173
			Pineapples	1	3	0.02	0	0.6632	0.6632		68.8513	2.47131	28.6774	0.456622	0.0163897	0.190189	0.456622	0.000655588	0.000638217
			Dates	0.26	2	0.01	0	0.6632	0.172432		68.8513	2.47131	28.6774	0.118722	0.00426132	0.049449	0.118722	0.000170453	0.000165936
			Grapes (excluding wine)	8.17	14	0.14	0.05	1.214	9.91838		68.8513	2.47131	28.6774	6.82893	0.245114	2.84434	6.82893	0.00980454	0.00954475
			Fruits, other	31.06	43	0.54	0.49	0.75	23.295		68.8513	2.47131	28.6774	16.0389	0.575691	6.6804	16.0389	0.0230276	0.0224175
	Vegetables		Cassava	0	0	0	0	0.987	0	84.4193	83.6105	0.362596	16.0269	0	0	0	0	0	0	51.9075	0.0889442	0.101638
			Potatoes	56.86	108	2.29	0.15	0.37	21.0382		59.711	1.6649	38.6241	12.5621	0.350265	8.12582	12.5621	0.0140106	0.0272679
			Sweet potatoes	0.26	1	0	0	0.365	0.0949		65.672	2.57696	31.751	0.0623227	0.00244554	0.0301317	0.0623227	9.78215e-05	0.000101113
			Yams	0	0	0	0	0.365	0		65.672	2.57696	31.751	0	0	0	0	0	0
			Roots, other	0.02	0	0	0	0.365	0.0073		65.672	2.57696	31.751	0.00479406	0.000188118	0.00231782	0.00479406	7.52473e-06	7.77794e-06
			Tomatoes	13.62	12	0.57	0.13	1.427	19.4357		53.5199	4.20609	42.274	10.402	0.817484	8.21626	10.402	0.0326994	0.0275713
			Onions	8.68	9	0.29	0.05	0.395	3.4286		71.3251	1.22109	27.4538	2.44545	0.0418664	0.941282	2.44545	0.00167465	0.00315866
			Vegetables, other	65.4	49	2.22	0.47	0.455	29.757		65.672	2.57696	31.751	19.542	0.766827	9.44815	19.542	0.0306731	0.0317052
			Aquatic plants	0	0	0	0	0	0		65.672	2.57696	31.751	0	0	0	0	0	0
			Beans	0.16	1	0.09	0.01	1.61	0.2576		75.1226	5.04344	19.834	0.193516	0.0129919	0.0510924	0.193516	0.000519676	0.000171451
			Peas	0.13	1	0.08	0	0.896	0.11648		66.4257	5.15877	28.4155	0.0773727	0.00600894	0.0330984	0.0773727	0.000240358	0.000111068
			Pulses, other	0.72	7	0.43	0.05	1.61	1.1592		65.672	2.57696	31.751	0.76127	0.0298722	0.368058	0.76127	0.00119489	0.00123509
			Nuts	4.78	33	0.83	3.04	0.278	1.32884		62.5618	3.79852	33.6397	0.831347	0.0504762	0.447017	0.831347	0.00201905	0.00150006
			Soybeans	2.14	19	2.11	0.99	1.8925	4.04995		63.3478	1.20151	35.4507	2.56556	0.0486604	1.43573	2.56556	0.00194642	0.0048179
			Groundnuts (shelled equivalents)	1.5	19	0.88	1.63	2.497	3.7455		65.672	2.57696	31.751	2.45975	0.0965202	1.18923	2.45975	0.00386081	0.00399072
	Meat	Ruminant	Bovine meat	16.65	54	6.72	2.81	42.8	712.62	740.453	10.5	73	16.5	74.8251	520.213	117.582	74.8251	20.8085	0.394571	80.4752	21.432	0.416707
			Mutton and goat meat	1.14	7	0.4	0.6	24.415	27.8331		20.3	56	23.7	5.65012	15.5865	6.59644	5.65012	0.623461	0.0221357
		Non-ruminant	Pig meat	48.95	238	13.98	19.75	7.282	356.454	548.117	47.5051	28.439	24.0559	169.334	101.372	85.7481	169.334	4.05488	0.287745	269.092	4.99592	0.517205
			Poultry meat	18.51	66	7.65	3.75	6.092	112.763		53.86	5.83151	40.3085	60.7341	6.57579	45.453	60.7341	0.263031	0.152527
			Meat, other	1.34	4	0.59	0.12	6.687	8.96058		49.4604	21.4829	29.0567	4.43194	1.92499	2.60365	4.43194	0.0769996	0.00873707
			Offals, edible	2.6	10	1.52	0.33	26.9	69.94		49.4604	21.4829	29.0567	34.5926	15.0251	20.3222	34.5926	0.601005	0.0681955
	Seafood		Freshwater fish	4.1	7	1.12	0.28	4.005	16.4205	47.7542	49.4604	21.4829	29.0567	8.12165	3.5276	4.77125	8.12165	0.141104	0.0160109	49.9697	0.25391	0.0263667
			Demersal fish	2.76	8	0.91	0.5	4.005	11.0538		78.6427	5.32556	16.0317	8.69301	0.588677	1.77211	8.69301	0.0235471	0.00594668
			Pelagic fish	3.94	10	1.19	0.53	4.005	15.7797		91.6865	7.21239	1.10113	14.4679	1.13809	0.173755	14.4679	0.0455237	0.000583071
			Marine fish, other	0.7	2	0.25	0.06	4.005	2.8035		89.095	4.66193	6.24304	2.49778	0.130697	0.175024	2.49778	0.00522789	0.000587328
			Crustaceans	1.69	2	0.33	0.02	7.3405	12.4054		89.095	4.66193	6.24304	11.0526	0.578333	0.774477	11.0526	0.0231333	0.00259892
			Cephalopods	0.25	1	0.1	0.01	7.3405	1.83512		89.095	4.66193	6.24304	1.63501	0.0855523	0.114568	1.63501	0.00342209	0.000384455
			Molluscs, other	0.51	0	0.04	0.01	7.3405	3.74365		90.3737	7.81574	1.81055	3.38328	0.292594	0.0677806	3.38328	0.0117038	0.000227452
			Aquatic animals, others	0.02	0	0	0	6.6476	0.132952		89.095	4.66193	6.24304	0.118454	0.00619813	0.00830025	0.118454	0.000247925	2.78532e-05
	Dairy		Cream	8.27	44	0.61	4.37	2.781	22.9989	714.06	24.1	56.7	19.2	5.54273	13.0404	4.41578	5.54273	0.521614	0.0148181	159.931	16.7082	0.457799
			Butter, ghee	5.62	114	0.14	12.89	2.781	15.6292		24.1	56.7	19.2	3.76664	8.86177	3.00081	3.76664	0.354471	0.0100698
			Milk (excluding butter) *includes cheese	187.62	308	25.36	17.36	3.6	675.432		22.3	58.6	19.1	150.621	395.803	129.008	150.621	15.8321	0.432911
	Eggs		Eggs	15.26	61	4.88	4.25	4.507	68.7768	68.7768	41.5	6.5	52	28.5424	4.47049	35.7639	28.5424	0.17882	0.120013	28.5424	0.17882	0.120013
	Oils		Oilcrops, other	0.5	7	0.24	0.61	1.313	0.6565	87.861	61.4	13	25.6	0.403091	0.085345	0.168064	0.403091	0.0034138	0.000563973	57.2178	0.289383	0.0784556
			Soybean oil	1.18	29	0	3.23	6.117	7.21806		61.4	13	25.6	4.43189	0.938348	1.84782	4.43189	0.0375339	0.00620075
			Groundnut oil	0.05	1	0	0.15	5.752	0.2876		61.4	13	25.6	0.176586	0.037388	0.0736256	0.176586	0.00149552	0.000247066
			Sunflowerseed oil	2.5	178	0.1	20.06	3.607	9.0175		61.4	13	25.6	5.53674	1.17227	2.30848	5.53674	0.046891	0.00774658
			Rape and mustard oil	9.35	226	0	25.6	3.828	35.7918		65.1	3.3	31.6	23.3005	1.18113	11.3102	23.3005	0.0472452	0.0379537
			Cottonseed oil	0	0	0	0	5.752	0		61.4	13	25.6	0	0	0	0	0	0
			Palmkernel oil	0	0	0	0	5.752	0		56.142	28.9894	14.8685	0	0	0	0	0	0
			Sesame seed oil	0.02	0	0	0.04	5.752	0.11504		61.4	13	25.6	0.0706346	0.0149552	0.0294502	0.0706346	0.000598208	9.88263e-05
			Palm oil	0	5	0	0.59	7.605	0		61.4923	12.9177	25.59	0	0	0	0	0	0
			Coconut oil	0	29	0.02	3.28	5.752	0		61.4	13	25.6	0	0	0	0	0	0
			Olive Oil	1.02	25	0	2.79	5.944	6.06288		89.1721	3.20831	7.61958	5.4064	0.194516	0.461966	5.4064	0.00778064	0.00155022
			Rice bran oil	0	0	0	0	5.752	0		61.4	13	25.6	0	0	0	0	0	0
			Maize germ oil	0.01	3	0	0.31	5.752	0.05752		61.4	13	25.6	0.0353173	0.0074776	0.0147251	0.0353173	0.000299104	4.94132e-05
			Oilcrops oil, other	0.84	18	0	2.07	5.752	4.83168		61.4	13	25.6	2.96665	0.628118	1.23691	2.96665	0.0251247	0.0041507
			Fats, animals, raw	3.31	231	0.03	25.65	6.733	22.2862		61.4	13	25.6	13.6837	2.89721	5.70527	13.6837	0.115888	0.0191452
			Fish, body oil	0	0	0	0	6.733	0		61.4	13	25.6	0	0	0	0	0	0
			Fish, liver oil	0	0	0	0	6.733	0		61.4	13	25.6	0	0	0	0	0	0
			Sunflower seed	0	0	0	0	1.313	0		61.4	13	25.6	0	0	0	0	0	0
			Rape and mustardseed	0	1	0	0	1.313	0		65.1	3.3	31.6	0	0	0	0	0	0
			Sesame seed	0.28	4	0.14	0.38	1.313	0.36764		61.4923	12.9177	25.59	0.22607	0.0474907	0.094079	0.22607	0.00189963	0.000315701
			Palm kernels	0	0	0	0	1.313	0		56.142	28.9894	14.8685	0	0	0	0	0	0
			Olives (including preserved)	0.72	2	0.02	0.22	1.313	0.94536		89.1721	3.20831	7.61958	0.842997	0.0303301	0.0720325	0.842997	0.0012132	0.00024172
			Coconuts (including copra)	0.17	3	0.03	0.27	1.313	0.22321		61.4923	12.9177	25.59	0.137257	0	0.0571194	0.137257	0	0.000191676
	Beverages		Coffee	7.23	10	1.24	0	16.477	119.129	285.425	53.6	0	46.4	63.853	0	55.2757	63.853	0	0.185489	214.081	0.0626443	0.235249
			Wine	26.29	50	0	0	1.585	41.6696		79.6583	3.35563	17.7687	33.1933	1.39828	7.40417	33.1933	0.0559312	0.0248462
			Beer	105.77	142	1.45	0	1.109	117.299		95	0	5	111.434	0	5.86495	111.434	0	0.019681
			Beverages, fermented	0	0	0	0	1.347	0		82	3	15	0	0	0	0	0	0
			Beverages, alcoholic	2.47	20	0	0	1.347	3.32709		82	3	15	2.72821	0.0998127	0.499064	2.72821	0.00399251	0.00167471
			Tea (including mate)	0.33	0	0.06	0	12.124	4.00092		71.8	1.7	26.5	2.87266	0.0680156	1.06024	2.87266	0.00272063	0.00355787
	Other		Sugar cane	0	0	0	0	2.672	0	57.3525	74.1	1.1	24.8	0	0	0	0	0	0	22.4026	0.875955	0.043852
			Sugar (non-centrifugal)	0	0	0	0	0.97	0		59.6	16.5	24	0	0	0	0	0	0
			Sugar beet	0	0	0	0	1.536	0		59.6	16.5	24	0	0	0	0	0	0
			Sugar (raw equivalent)	41.65	407	0	0	0.97	40.4005		30.4914	47.2261	22.2824	12.3187	19.0796	9.00221	12.3187	0.763184	0.0302088
			Sweeteners, other	3.64	32	0.02	0	0.97	3.5308		59.6	16.5	24	2.10436	0.582582	0.847392	2.10436	0.0233033	0.0028436
			Honey	1.03	8	0.01	0	0.97	0.9991		59.6	16.5	24	0.595464	0.164852	0.239784	0.595464	0.00659406	0.000804644
			Cocoa beans	0	17	0.24	1.48	18.681	0		59.6	16.5	24	0	0	0	0	0	0
			Pepper	0.2	2	0.06	0.01	12.124	2.4248		59.6	16.5	24	1.44518	0.400092	0.581952	1.44518	0.0160037	0.00195286
			Pimento	0.26	2	0.09	0.12	12.124	3.15224		59.6	16.5	24	1.87874	0.52012	0.756538	1.87874	0.0208048	0.00253872
			Cloves	0.01	0	0	0	12.124	0.12124		59.6	16.5	24	0.072259	0.0200046	0.0290976	0.072259	0.000800184	9.7643e-05
			Spices, other	0.55	5	0.17	0.21	12.124	6.6682		59.6	16.5	24	3.97425	1.10025	1.60037	3.97425	0.0440101	0.00537036
			Infant food	0.02	0	0.01	0	2.781	0.05562		24.6	56.4	19	0.0136825	0.0313697	0.0105678	0.0136825	0.00125479	3.54624e-05
			Miscellaneous	0	0	0	0	6.84227	0		59.6	16.5	24	0	0	0	0	0	0
Azerbaijan	Grain products (non-rice)		Wheat	185.93	1620	48.21	6	1.4	260.302	272.318	57.9	1.8	40.3	150.715	4.68544	104.902	150.715	0.187417	0.352019	159.243	0.197145	0.362927	10048000	7.35374e+09	3.53841e+08	1.76025e+07
			Barley	0.05	0	0.01	0	1.313	0.06565		54.569	1.91155	43.5195	0.0358245	0.00125493	0.0285705	0.0358245	5.01974e-05	9.58743e-05
			Maize	10.77	80	1.86	0.27	0.988	10.6408		71.9	2.05597	26.1	7.65071	0.218771	2.77724	7.65071	0.00875085	0.00931959
			Millet	0	0	0	0	1.313	0		61.8	1.8	36.4	0	0	0	0	0	0
			Rye	0.2	2	0.05	0.01	1.4	0.28		73.3007	1.65211	25.0472	0.205242	0.00462592	0.0701322	0.205242	0.000185037	0.000235343
			Oats	0.12	1	0.05	0.02	1.575	0.189		61.8	1.8	36.4	0.116802	0.003402	0.068796	0.116802	0.00013608	0.000230859
			Sorghum	0	0	0	0	1.313	0		61.8	1.8	36.4	0	0	0	0	0	0
			Cereals, other	0.64	6	0.18	0.02	1.313	0.84032		61.8	1.8	36.4	0.519318	0.0151258	0.305876	0.519318	0.00060503	0.00102643
	Rice		Rice (milled equivalent)	2.92	22	0.42	0.06	3.839	11.2099	11.2099	22.2	71.8	6	2.48859	8.04869	0.672593	2.48859	0.321948	0.00225702	2.48859	0.321948	0.00225702
	Fruit		Oranges, mandarines	6.61	6	0.1	0.02	0.317	2.09537	56.0385	56.9055	1.22138	41.8731	1.19238	0.0255924	0.877397	1.19238	0.0010237	0.00294429	38.7186	0.0535061	0.0536319
			Lemons, limes	1.91	1	0.03	0.01	0.317	0.60547		56.3759	0	43.6241	0.341339	0	0.264131	0.341339	0	0.000886344
			Grapefruit	0.19	0	0	0	0.317	0.06023		68.8513	2.47131	28.6774	0.0414691	0.00148847	0.0172724	0.0414691	5.95387e-05	5.79611e-05
			Citrus, other	0.41	0	0.01	0	0.317	0.12997		68.8513	2.47131	28.6774	0.089486	0.00321196	0.037272	0.089486	0.000128478	0.000125074
			Bananas	3.74	6	0.07	0.03	0.678	2.53572		79.4125	3.10136	17.4861	2.01368	0.0786417	0.443399	2.01368	0.00314567	0.00148792
			Plantains	0	0	0	0	0.6632	0		68.8513	2.47131	28.6774	0	0	0	0	0	0
			Apples	15.06	19	0.04	0.11	0.357	5.37642		72.4477	2.06109	25.4912	3.89509	0.110813	1.37051	3.89509	0.00443252	0.00459903
			Pineapples	0.21	0	0	0	0.6632	0.139272		68.8513	2.47131	28.6774	0.0958905	0.00344184	0.0399396	0.0958905	0.000137674	0.000134026
			Dates	0.65	3	0.03	0.01	0.6632	0.43108		68.8513	2.47131	28.6774	0.296804	0.0106533	0.123623	0.296804	0.000426132	0.000414841
			Grapes (excluding wine)	12.5	19	0.18	0.13	1.214	15.175		68.8513	2.47131	28.6774	10.4482	0.375021	4.3518	10.4482	0.0150008	0.0146033
			Fruits, other	39.32	50	0.69	0.45	0.75	29.49		68.8513	2.47131	28.6774	20.3042	0.728788	8.45697	20.3042	0.0291515	0.0283791
	Vegetables		Cassava	0	0	0	0	0.987	0	145.043	83.6105	0.362596	16.0269	0	0	0	0	0	0	86.4743	0.178218	0.181587
			Potatoes	72.67	133	3.18	0.2	0.37	26.8879		59.711	1.6649	38.6241	16.055	0.447657	10.3852	16.055	0.0179063	0.0348497
			Sweet potatoes	0	0	0	0	0.365	0		65.672	2.57696	31.751	0	0	0	0	0	0
			Yams	0	0	0	0	0.365	0		65.672	2.57696	31.751	0	0	0	0	0	0
			Roots, other	0	0	0	0	0.365	0		65.672	2.57696	31.751	0	0	0	0	0	0
			Tomatoes	44	21	0.97	0.24	1.427	62.788		53.5199	4.20609	42.274	33.6041	2.64092	26.543	33.6041	0.105637	0.0890704
			Onions	17.87	15	0.55	0.1	0.395	7.05865		71.3251	1.22109	27.4538	5.03459	0.0861926	1.93787	5.03459	0.0034477	0.00650292
			Vegetables, other	100.45	64	2.45	0.45	0.455	45.7048		65.672	2.57696	31.751	30.0152	1.17779	14.5117	30.0152	0.0471118	0.0486971
			Aquatic plants	0	0	0	0	0	0		65.672	2.57696	31.751	0	0	0	0	0	0
			Beans	0.58	5	0.35	0.03	1.61	0.9338		75.1226	5.04344	19.834	0.701494	0.0470956	0.18521	0.701494	0.00188383	0.00062151
			Peas	0	0	0	0	0.896	0		66.4257	5.15877	28.4155	0	0	0	0	0	0
			Pulses, other	0	0	0	0	1.61	0		65.672	2.57696	31.751	0	0	0	0	0	0
			Nuts	3.76	34	0.76	3.19	0.278	1.04528		62.5618	3.79852	33.6397	0.653946	0.0397051	0.351629	0.653946	0.0015882	0.00117996
			Soybeans	0	0	0	0	1.8925	0		63.3478	1.20151	35.4507	0	0	0	0	0	0
			Groundnuts (shelled equivalents)	0.25	4	0.18	0.33	2.497	0.62425		65.672	2.57696	31.751	0.409958	0.0160867	0.198206	0.409958	0.000643468	0.00066512
	Meat	Ruminant	Bovine meat	12.61	77	5.15	6.08	42.8	539.708	729.413	10.5	73	16.5	56.6693	393.987	89.0518	56.6693	15.7595	0.298832	95.1794	20.0089	0.449704
			Mutton and goat meat	7.77	56	2.87	4.85	24.415	189.705		20.3	56	23.7	38.51	106.235	44.96	38.51	4.24938	0.150872
		Non-ruminant	Pig meat	0.53	5	0.18	0.47	7.282	3.85946	150.494	47.5051	28.439	24.0559	1.83344	1.09759	0.928427	1.83344	0.0439037	0.00311553	78.0772	0.77497	0.177997
			Poultry meat	13.87	47	4.7	2.93	6.092	84.496		53.86	5.83151	40.3085	45.5096	4.9274	34.0591	45.5096	0.197096	0.114292
			Meat, other	0	0	0	0	6.687	0		49.4604	21.4829	29.0567	0	0	0	0	0	0
			Offals, edible	2.31	7	1.13	0.18	26.9	62.139		49.4604	21.4829	29.0567	30.7342	13.3492	18.0555	30.7342	0.53397	0.060589
	Seafood		Freshwater fish	0.68	1	0.18	0.04	4.005	2.7234	10.5328	49.4604	21.4829	29.0567	1.34701	0.585065	0.79133	1.34701	0.0234026	0.00265547	10.7703	0.0509554	0.00406704
			Demersal fish	0.36	0	0.07	0.01	4.005	1.4418		78.6427	5.32556	16.0317	1.13387	0.0767839	0.231145	1.13387	0.00307136	0.000775654
			Pelagic fish	1.82	4	0.55	0.19	4.005	7.2891		91.6865	7.21239	1.10113	6.68312	0.525718	0.0802626	6.68312	0.0210287	0.000269338
			Marine fish, other	0.12	0	0.05	0.01	4.005	0.4806		89.095	4.66193	6.24304	0.428191	0.0224052	0.0300041	0.428191	0.00089621	0.000100685
			Crustaceans	0.16	0	0.03	0	7.3405	1.17448		89.095	4.66193	6.24304	1.0464	0.0547535	0.0733233	1.0464	0.00219014	0.000246051
			Cephalopods	0.01	0	0	0	7.3405	0.073405		89.095	4.66193	6.24304	0.0654002	0.00342209	0.0045827	0.0654002	0.000136884	1.53782e-05
			Molluscs, other	0.01	0	0	0	7.3405	0.073405		90.3737	7.81574	1.81055	0.0663388	0.00573714	0.00132903	0.0663388	0.000229486	4.45984e-06
			Aquatic animals, others	0	0	0	0	6.6476	0		89.095	4.66193	6.24304	0	0	0	0	0	0
	Dairy		Cream	0	0	0	0	2.781	0	543.088	24.1	56.7	19.2	0	0	0	0	0	0	121.287	12.7224	0.34812
			Butter, ghee	3.57	71	0.09	8.02	2.781	9.92817		24.1	56.7	19.2	2.39269	5.62927	1.90621	2.39269	0.225171	0.00639667
			Milk (excluding butter) *includes cheese	148.1	250	15.13	14.55	3.6	533.16		22.3	58.6	19.1	118.895	312.432	101.834	118.895	12.4973	0.341723
	Eggs		Eggs	8.1	31	2.38	2.18	4.507	36.5067	36.5067	41.5	6.5	52	15.1503	2.37294	18.9835	15.1503	0.0949174	0.063703	15.1503	0.0949174	0.063703
	Oils		Oilcrops, other	0	0	0	0	1.313	3.32189	32.9337	61.4	13	25.6	2.03964	0.431846	0.850404	2.03964	0.0172738	0.0028537	20.4651	0.167681	0.0277624
			Soybean oil	0.38	9	0	1.05	6.117	2.32446		61.4	13	25.6	1.42722	0.30218	0.595062	1.42722	0.0120872	0.00199685
			Groundnut oil	0	0	0	0	5.752	0		61.4	13	25.6	0	0	0	0	0	0
			Sunflowerseed oil	0.31	8	0	0.86	3.607	1.11817		61.4	13	25.6	0.686556	0.145362	0.286252	0.686556	0.00581448	0.000960576
			Rape and mustard oil	0	0	0	0.01	3.828	0		65.1	3.3	31.6	0	0	0	0	0	0
			Cottonseed oil	0	0	0	0	5.752	0		61.4	13	25.6	0	0	0	0	0	0
			Palmkernel oil	0	0	0	0	5.752	0		56.142	28.9894	14.8685	0	0	0	0	0	0
			Sesame seed oil	0	0	0	0	5.752	0		61.4	13	25.6	0	0	0	0	0	0
			Palm oil	0	0	0	0.01	7.605	0		61.4923	12.9177	25.59	0	0	0	0	0	0
			Coconut oil	0.01	0	0	0.03	5.752	0.05752		61.4	13	25.6	0.0353173	0.0074776	0.0147251	0.0353173	0.000299104	4.94132e-05
			Olive Oil	0.13	3	0	0.36	5.944	0.77272		89.1721	3.20831	7.61958	0.689051	0.0247912	0.058878	0.689051	0.00099165	0.000197577
			Rice bran oil	0	0	0	0	5.752	0		61.4	13	25.6	0	0	0	0	0	0
			Maize germ oil	1.63	39	0	4.47	5.752	9.37576		61.4	13	25.6	5.75672	1.21885	2.40019	5.75672	0.048754	0.00805434
			Oilcrops oil, other	2.53	50	0.04	5.63	5.752	14.5526		61.4	13	25.6	8.93527	1.89183	3.72546	8.93527	0.0756733	0.0125015
			Fats, animals, raw	0.19	4	0.01	0.45	6.733	1.27927		61.4	13	25.6	0.785472	0.166305	0.327493	0.785472	0.0066522	0.00109897
			Fish, body oil	0	0	0	0	6.733	0		61.4	13	25.6	0	0	0	0	0	0
			Fish, liver oil	0	0	0	0	6.733	0		61.4	13	25.6	0	0	0	0	0	0
			Sunflower seed	0	0	0	0	1.313	0		61.4	13	25.6	0	0	0	0	0	0
			Rape and mustardseed	0	0	0	0	1.313	0		65.1	3.3	31.6	0	0	0	0	0	0
			Sesame seed	0	0	0	0	1.313	0		61.4923	12.9177	25.59	0	0	0	0	0	0
			Palm kernels	0	0	0	0	1.313	0		56.142	28.9894	14.8685	0	0	0	0	0	0
			Olives (including preserved)	0.08	0	0	0.03	1.313	0.10504		89.1721	3.20831	7.61958	0.0936664	0.00337001	0.00800361	0.0936664	0.0001348	2.68577e-05
			Coconuts (including copra)	0.02	0	0	0.02	1.313	0.02626		61.4923	12.9177	25.59	0.0161479	0	0.00671993	0.0161479	0	2.25501e-05
	Beverages		Coffee	0.13	0	0.01	0	16.477	2.14201	83.7807	53.6	0	46.4	1.14812	0	0.993893	1.14812	0	0.00333521	73.3605	0.0270952	0.0327252
			Wine	0.75	2	0	0	1.585	1.18875		79.6583	3.35563	17.7687	0.946938	0.03989	0.211226	0.946938	0.0015956	0.000708812
			Beer	47.46	64	0.65	0	1.109	52.6331		95	0	5	50.0015	0	2.63166	50.0015	0	0.00883106
			Beverages, fermented	0	0	0	0	1.347	0		82	3	15	0	0	0	0	0	0
			Beverages, alcoholic	9.4	76	0	0	1.347	12.6618		82	3	15	10.3827	0.379854	1.89927	10.3827	0.0151942	0.00637339
			Tea (including mate)	1.25	1	0.34	0	12.124	15.155		71.8	1.7	26.5	10.8813	0.257635	4.01607	10.8813	0.0103054	0.0134768
	Other		Sugar cane	0	0	0	0	2.672	0	60.1516	74.1	1.1	24.8	0	0	0	0	0	0	30.6467	0.617369	0.0473591
			Sugar (non-centrifugal)	0	0	0	0	0.97	0		59.6	16.5	24	0	0	0	0	0	0
			Sugar beet	0	0	0	0	1.536	0		59.6	16.5	24	0	0	0	0	0	0
			Sugar (raw equivalent)	17.74	169	0	0	0.97	17.2078		30.4914	47.2261	22.2824	5.2469	8.12658	3.83432	5.2469	0.325063	0.0128668
			Sweeteners, other	26.93	30	0	0	0.97	26.1221		59.6	16.5	24	15.5688	4.31015	6.2693	15.5688	0.172406	0.0210379
			Honey	0.26	2	0	0	0.97	0.2522		59.6	16.5	24	0.150311	0.041613	0.060528	0.150311	0.00166452	0.000203114
			Cocoa beans	0	23	0.26	2.06	18.681	0		59.6	16.5	24	0	0	0	0	0	0
			Pepper	0.02	0	0.01	0	12.124	0.24248		59.6	16.5	24	0.144518	0.0400092	0.0581952	0.144518	0.00160037	0.000195286
			Pimento	0.01	0	0	0	12.124	0.12124		59.6	16.5	24	0.072259	0.0200046	0.0290976	0.072259	0.000800184	9.7643e-05
			Cloves	0	0	0	0	12.124	0		59.6	16.5	24	0	0	0	0	0	0
			Spices, other	0.1	1	0.03	0.04	12.124	1.2124		59.6	16.5	24	0.72259	0.200046	0.290976	0.72259	0.00800184	0.00097643
			Infant food	0.2	2	0.08	0.02	2.781	0.5562		24.6	56.4	19	0.136825	0.313697	0.105678	0.136825	0.0125479	0.000354624
			Miscellaneous	2.11	2	0.07	0.03	6.84227	14.4372		59.6	16.5	24	8.60457	2.38214	3.46493	8.60457	0.0952855	0.0116273
Belarus	Grain products (non-rice)		Wheat	69.26	543	14.56	9.91	1.4	96.964	150.398	57.9	1.8	40.3	56.1422	1.74535	39.0765	56.1422	0.0698141	0.131129	92.3477	0.106769	0.185843	9452000	9.22418e+09	3.33454e+08	1.91683e+07
			Barley	4.19	26	0.71	0.09	1.313	5.50147		54.569	1.91155	43.5195	3.00209	0.105164	2.39421	3.00209	0.00420654	0.00803427
			Maize	0.52	5	0.12	0.02	0.988	0.51376		71.9	2.05597	26.1	0.369393	0.0105628	0.134091	0.369393	0.000422511	0.000449971
			Millet	0	0	0	0	1.313	0		61.8	1.8	36.4	0	0	0	0	0	0
			Rye	21.92	168	4.43	0.89	1.4	30.688		73.3007	1.65211	25.0472	22.4945	0.507001	7.68649	22.4945	0.02028	0.0257936
			Oats	8.13	47	1.96	0.77	1.575	12.8048		61.8	1.8	36.4	7.91334	0.230486	4.66093	7.91334	0.00921942	0.0156407
			Sorghum	0	0	0	0	1.313	0		61.8	1.8	36.4	0	0	0	0	0	0
			Cereals, other	2.99	30	0.82	0.09	1.313	3.92587		61.8	1.8	36.4	2.42619	0.0706657	1.42902	2.42619	0.00282663	0.00479536
	Rice		Rice (milled equivalent)	2.94	29	0.54	0.06	3.839	11.2867	11.2867	22.2	71.8	6	2.50564	8.10382	0.6772	2.50564	0.324153	0.00227248	2.50564	0.324153	0.00227248
	Fruit		Oranges, mandarines	6.77	6	0.11	0.02	0.317	2.14609	42.0289	56.9055	1.22138	41.8731	1.22124	0.0262119	0.898635	1.22124	0.00104848	0.00301555	29.4828	0.0401875	0.0387296
			Lemons, limes	0.86	0	0.01	0	0.317	0.27262		56.3759	0	43.6241	0.153692	0	0.118928	0.153692	0	0.000399087
			Grapefruit	0.95	1	0.01	0	0.317	0.30115		68.8513	2.47131	28.6774	0.207346	0.00744234	0.086362	0.207346	0.000297694	0.000289806
			Citrus, other	0.01	0	0	0	0.317	0.00317		68.8513	2.47131	28.6774	0.00218259	7.83404e-05	0.000909074	0.00218259	3.13362e-06	3.05058e-06
			Bananas	7.63	13	0.15	0.06	0.678	5.17314		79.4125	3.10136	17.4861	4.10812	0.160437	0.904582	4.10812	0.0064175	0.00303551
			Plantains	0	0	0	0	0.6632	0		68.8513	2.47131	28.6774	0	0	0	0	0	0
			Apples	22.54	30	0.06	0.18	0.357	8.04678		72.4477	2.06109	25.4912	5.82971	0.165852	2.05122	5.82971	0.00663407	0.00688328
			Pineapples	0.6	1	0.01	0	0.6632	0.39792		68.8513	2.47131	28.6774	0.273973	0.00983382	0.114113	0.273973	0.000393353	0.00038293
			Dates	0.07	0	0	0	0.6632	0.046424		68.8513	2.47131	28.6774	0.0319635	0.00114728	0.0133132	0.0319635	4.58912e-05	4.46752e-05
			Grapes (excluding wine)	1.76	3	0.04	0.01	1.214	2.13664		68.8513	2.47131	28.6774	1.4711	0.0528029	0.612733	1.4711	0.00211212	0.00205615
			Fruits, other	31.34	42	0.54	0.36	0.75	23.505		68.8513	2.47131	28.6774	16.1835	0.580881	6.74063	16.1835	0.0232352	0.0226196
	Vegetables		Cassava	0	0	0	0	0.987	0	163.262	83.6105	0.362596	16.0269	0	0	0	0	0	0	98.834	0.164489	0.202401
			Potatoes	182.43	335	8	0.5	0.37	67.4991		59.711	1.6649	38.6241	40.3044	1.12379	26.0709	40.3044	0.0449518	0.0874864
			Sweet potatoes	0	0	0	0	0.365	0		65.672	2.57696	31.751	0	0	0	0	0	0
			Yams	0	0	0	0	0.365	0		65.672	2.57696	31.751	0	0	0	0	0	0
			Roots, other	0	0	0	0	0.365	0		65.672	2.57696	31.751	0	0	0	0	0	0
			Tomatoes	27.57	17	0.8	0.18	1.427	39.3424		53.5199	4.20609	42.274	21.056	1.65477	16.6316	21.056	0.066191	0.0558107
			Onions	21.1	18	0.64	0.12	0.395	8.3345		71.3251	1.22109	27.4538	5.94459	0.101772	2.28814	5.94459	0.00407088	0.00767832
			Vegetables, other	98.53	66	3.01	0.44	0.455	44.8312		65.672	2.57696	31.751	29.4415	1.15528	14.2343	29.4415	0.0462113	0.0477663
			Aquatic plants	0	0	0	0	0	0		65.672	2.57696	31.751	0	0	0	0	0	0
			Beans	0	0	0	0	1.61	0		75.1226	5.04344	19.834	0	0	0	0	0	0
			Peas	0	0	0	0	0.896	0		66.4257	5.15877	28.4155	0	0	0	0	0	0
			Pulses, other	0.02	0	0.01	0	1.61	0.0322		65.672	2.57696	31.751	0.0211464	0.000829782	0.0102238	0.0211464	3.31913e-05	3.43082e-05
			Nuts	2.61	26	0.6	2.44	0.278	0.72558		62.5618	3.79852	33.6397	0.453936	0.0275613	0.244083	0.453936	0.00110245	0.000819069
			Soybeans	0.62	5	0.6	0.28	1.8925	1.17335		63.3478	1.20151	35.4507	0.743292	0.0140979	0.41596	0.743292	0.000563915	0.00139584
			Groundnuts (shelled equivalents)	0.53	8	0.37	0.7	2.497	1.32341		65.672	2.57696	31.751	0.86911	0.0341038	0.420196	0.86911	0.00136415	0.00141005
	Meat	Ruminant	Bovine meat	16.39	92	7.41	6.7	42.8	701.492	704.178	10.5	73	16.5	73.6567	512.089	115.746	73.6567	20.4836	0.38841	74.2018	20.5437	0.390546
			Mutton and goat meat	0.11	1	0.04	0.07	24.415	2.68565		20.3	56	23.7	0.545187	1.50396	0.636499	0.545187	0.0601586	0.0021359
		Non-ruminant	Pig meat	38.46	204	11.03	17.35	7.282	280.066	650.641	47.5051	28.439	24.0559	133.045	79.648	67.3723	133.045	3.18592	0.226081	324.063	5.2704	0.653751
			Poultry meat	28.84	98	9.69	6.25	6.092	175.693		53.86	5.83151	40.3085	94.6284	10.2456	70.8193	94.6284	0.409823	0.237649
			Meat, other	0.22	1	0.12	0.03	6.687	1.47114		49.4604	21.4829	29.0567	0.727632	0.316043	0.427465	0.727632	0.0126417	0.00143444
			Offals, edible	7.19	22	3.59	0.57	26.9	193.411		49.4604	21.4829	29.0567	95.6619	41.5503	56.1988	95.6619	1.66201	0.188587
	Seafood		Freshwater fish	1.32	2	0.35	0.08	4.005	5.2866	44.2006	49.4604	21.4829	29.0567	2.61477	1.13571	1.53611	2.61477	0.0454286	0.00515473	41.4173	0.159013	0.0137403
			Demersal fish	3.01	4	0.64	0.18	4.005	12.055		78.6427	5.32556	16.0317	9.48042	0.641999	1.93263	9.48042	0.02568	0.00648533
			Pelagic fish	6.39	13	1.86	0.54	4.005	25.5919		91.6865	7.21239	1.10113	23.4644	1.84579	0.281801	23.4644	0.0738316	0.000945641
			Marine fish, other	0.5	1	0.19	0.04	4.005	2.0025		89.095	4.66193	6.24304	1.78413	0.0933552	0.125017	1.78413	0.00373421	0.00041952
			Crustaceans	0.32	0	0.07	0	7.3405	2.34896		89.095	4.66193	6.24304	2.09281	0.109507	0.146647	2.09281	0.00438028	0.000492102
			Cephalopods	0.1	0	0.04	0	7.3405	0.73405		89.095	4.66193	6.24304	0.654002	0.0342209	0.045827	0.654002	0.00136884	0.000153782
			Molluscs, other	0.2	0	0.01	0	7.3405	1.4681		90.3737	7.81574	1.81055	1.32678	0.114743	0.0265806	1.32678	0.00458971	8.91967e-05
			Aquatic animals, others	0	0	0	0	6.6476	0		89.095	4.66193	6.24304	0	0	0	0	0	0
	Dairy		Cream	1.47	8	0.11	0.78	2.781	4.08807	297.64	24.1	56.7	19.2	0.985225	2.31794	0.784909	0.985225	0.0927174	0.00263392	66.6471	6.96515	0.19082
			Butter, ghee	3.99	78	0.1	8.86	2.781	11.0962		24.1	56.7	19.2	2.67418	6.29154	2.13047	2.67418	0.251662	0.00714922
			Milk (excluding butter) *includes cheese	78.46	194	12.85	7.35	3.6	282.456		22.3	58.6	19.1	62.9877	165.519	53.9491	62.9877	6.62077	0.181037
	Eggs		Eggs	13.99	53	4.1	3.76	4.507	63.0529	63.0529	41.5	6.5	52	26.167	4.09844	32.7875	26.167	0.163938	0.110025	26.167	0.163938	0.110025
	Oils		Oilcrops, other	0	0	0	0	1.313	3.33502	82.5079	61.4	13	25.6	2.0477	0.433553	0.853765	2.0477	0.0173421	0.00286498	51.5902	0.34186	0.0750485
			Soybean oil	1.3	32	0	3.56	6.117	7.9521		61.4	13	25.6	4.88259	1.03377	2.03574	4.88259	0.0413509	0.00683133
			Groundnut oil	0	0	0	0	5.752	0		61.4	13	25.6	0	0	0	0	0	0
			Sunflowerseed oil	9.28	225	0	25.42	3.607	33.473		61.4	13	25.6	20.5524	4.35148	8.56908	20.5524	0.174059	0.0287553
			Rape and mustard oil	5.74	139	0	15.72	3.828	21.9727		65.1	3.3	31.6	14.3042	0.7251	6.94338	14.3042	0.029004	0.0232999
			Cottonseed oil	0	0	0	0	5.752	0		61.4	13	25.6	0	0	0	0	0	0
			Palmkernel oil	0	0	0	0	5.752	0		56.142	28.9894	14.8685	0	0	0	0	0	0
			Sesame seed oil	0	0	0	0	5.752	0		61.4	13	25.6	0	0	0	0	0	0
			Palm oil	0	0	0	0	7.605	0		61.4923	12.9177	25.59	0	0	0	0	0	0
			Coconut oil	0.09	2	0	0.25	5.752	0.51768		61.4	13	25.6	0.317856	0.0672984	0.132526	0.317856	0.00269194	0.000444718
			Olive Oil	0.06	1	0	0.17	5.944	0.35664		89.1721	3.20831	7.61958	0.318023	0.0114421	0.0271745	0.318023	0.000457684	9.11895e-05
			Rice bran oil	0	0	0	0	5.752	0		61.4	13	25.6	0	0	0	0	0	0
			Maize germ oil	0.03	1	0	0.07	5.752	0.17256		61.4	13	25.6	0.105952	0.0224328	0.0441754	0.105952	0.000897312	0.000148239
			Oilcrops oil, other	2.54	50	0.04	5.65	5.752	14.6101		61.4	13	25.6	8.97059	1.89931	3.74018	8.97059	0.0759724	0.0125509
			Fats, animals, raw	0	66	0.01	7.3	6.733	0		61.4	13	25.6	0	0	0	0	0	0
			Fish, body oil	0	0	0	0	6.733	0		61.4	13	25.6	0	0	0	0	0	0
			Fish, liver oil	0	0	0	0	6.733	0		61.4	13	25.6	0	0	0	0	0	0
			Sunflower seed	0	0	0	0	1.313	0		61.4	13	25.6	0	0	0	0	0	0
			Rape and mustardseed	0	0	0	0	1.313	0		65.1	3.3	31.6	0	0	0	0	0	0
			Sesame seed	0	0	0	0	1.313	0		61.4923	12.9177	25.59	0	0	0	0	0	0
			Palm kernels	0	0	0	0	1.313	0		56.142	28.9894	14.8685	0	0	0	0	0	0
			Olives (including preserved)	0.05	0	0	0.02	1.313	0.06565		89.1721	3.20831	7.61958	0.0585415	0.00210625	0.00500225	0.0585415	8.42502e-05	1.67861e-05
			Coconuts (including copra)	0.04	1	0.01	0.05	1.313	0.05252		61.4923	12.9177	25.59	0.0322958	0	0.0134399	0.0322958	0	4.51002e-05
	Beverages		Coffee	1.08	2	0.17	0	16.477	17.7952	120.367	53.6	0	46.4	9.53821	0	8.25695	9.53821	0	0.0277079	100.1	0.0541885	0.0638172
			Wine	8.53	16	0	0	1.585	13.52		79.6583	3.35563	17.7687	10.7698	0.453683	2.40234	10.7698	0.0181473	0.00806155
			Beer	50.99	68	0.7	0	1.109	56.5479		95	0	5	53.7205	0	2.8274	53.7205	0	0.0094879
			Beverages, fermented	2.07	3	0.01	0	1.347	2.78829		82	3	15	2.2864	0.0836487	0.418243	2.2864	0.00334595	0.0014035
			Beverages, alcoholic	17.83	144	0	0	1.347	24.017		82	3	15	19.6939	0.72051	3.60255	19.6939	0.0288204	0.0120891
			Tea (including mate)	0.47	1	0.13	0	12.124	5.69828		71.8	1.7	26.5	4.09137	0.0968708	1.51004	4.09137	0.00387483	0.00506726
	Other		Sugar cane	0	0	0	0	2.672	0	127.147	74.1	1.1	24.8	0	0	0	0	0	0	68.5402	1.14485	0.100967
			Sugar (non-centrifugal)	0	0	0	0	0.97	0		59.6	16.5	24	0	0	0	0	0	0
			Sugar beet	0	0	0	0	1.536	0		59.6	16.5	24	0	0	0	0	0	0
			Sugar (raw equivalent)	25.64	234	0	0	0.97	24.8708		30.4914	47.2261	22.2824	7.58346	11.7455	5.54182	7.58346	0.469821	0.0185967
			Sweeteners, other	40.84	57	0	0	0.97	39.6148		59.6	16.5	24	23.6104	6.53644	9.50755	23.6104	0.261458	0.0319045
			Honey	0.29	2	0	0	0.97	0.2813		59.6	16.5	24	0.167655	0.0464145	0.067512	0.167655	0.00185658	0.00022655
			Cocoa beans	1	26	0.32	2.38	18.681	18.681		59.6	16.5	24	11.1339	3.08236	4.48344	11.1339	0.123295	0.0150451
			Pepper	0.03	0	0.01	0	12.124	0.36372		59.6	16.5	24	0.216777	0.0600138	0.0872928	0.216777	0.00240055	0.000292929
			Pimento	0.02	0	0.01	0.01	12.124	0.24248		59.6	16.5	24	0.144518	0.0400092	0.0581952	0.144518	0.00160037	0.000195286
			Cloves	0	0	0	0	12.124	0		59.6	16.5	24	0	0	0	0	0	0
			Spices, other	0.14	1	0.04	0.04	12.124	1.69736		59.6	16.5	24	1.01163	0.280064	0.407366	1.01163	0.0112026	0.001367
			Infant food	0	0	0	0	2.781	0		24.6	56.4	19	0	0	0	0	0	0
			Miscellaneous	6.05	7	0.2	0.08	6.84227	41.3957		59.6	16.5	24	24.6719	6.8303	9.93498	24.6719	0.273212	0.0333389
Belgium	Grain products (non-rice)		Wheat	110.51	781	23.37	2.56	1.4	154.714	159.213	57.9	1.8	40.3	89.5794	2.78485	62.3497	89.5794	0.111394	0.209227	92.4923	0.114753	0.214269	11539000	1.08144e+10	3.8184e+08	2.10985e+07
			Barley	1.32	8	0.21	0.03	1.313	1.73316		54.569	1.91155	43.5195	0.945767	0.0331303	0.754262	0.945767	0.00132521	0.00253108
			Maize	1.15	8	0.19	0.03	0.988	1.1362		71.9	2.05597	26.1	0.816928	0.02336	0.296548	0.816928	0.000934399	0.000995128
			Millet	0	0	0	0	1.313	0		61.8	1.8	36.4	0	0	0	0	0	0
			Rye	0.89	8	0.22	0.04	1.4	1.246		73.3007	1.65211	25.0472	0.913326	0.0205853	0.312088	0.913326	0.000823414	0.00104728
			Oats	0.16	1	0.04	0.02	1.575	0.252		61.8	1.8	36.4	0.155736	0.004536	0.091728	0.155736	0.00018144	0.000307812
			Sorghum	0	0	0	0	1.313	0		61.8	1.8	36.4	0	0	0	0	0	0
			Cereals, other	0.1	1	0.03	0.01	1.313	0.1313		61.8	1.8	36.4	0.0811434	0.0023634	0.0477932	0.0811434	9.4536e-05	0.00016038
	Rice		Rice (milled equivalent)	11.37	101	1.82	0.22	3.839	43.6494	43.6494	22.2	71.8	6	9.69017	31.3403	2.61897	9.69017	1.25361	0.00878848	9.69017	1.25361	0.00878848
	Fruit		Oranges, mandarines	62.74	43	0.65	0.07	0.317	19.8886	61.7448	56.9055	1.22138	41.8731	11.3177	0.242915	8.32797	11.3177	0.00971659	0.0279462	41.2106	0.0523303	0.0645167
			Lemons, limes	2.53	1	0.04	0.01	0.317	0.80201		56.3759	0	43.6241	0.452141	0	0.349869	0.452141	0	0.00117406
			Grapefruit	1.23	1	0.01	0	0.317	0.38991		68.8513	2.47131	28.6774	0.268458	0.00963587	0.111816	0.268458	0.000385435	0.000375222
			Citrus, other	0.72	3	0.03	0.01	0.317	0.22824		68.8513	2.47131	28.6774	0.157146	0.00564051	0.0654533	0.157146	0.00022562	0.000219642
			Bananas	14.85	24	0.28	0.12	0.678	10.0683		79.4125	3.10136	17.4861	7.99549	0.312254	1.76056	7.99549	0.0124901	0.00590791
			Plantains	1.22	3	0.03	0.01	0.6632	0.809104		68.8513	2.47131	28.6774	0.557078	0.0199954	0.23203	0.557078	0.000799817	0.000778625
			Apples	8.65	14	0.03	0.07	0.357	3.08805		72.4477	2.06109	25.4912	2.23722	0.0636476	0.78718	2.23722	0.0025459	0.00264154
			Pineapples	3.42	4	0.03	0.01	0.6632	2.26814		68.8513	2.47131	28.6774	1.56165	0.0560528	0.650445	1.56165	0.00224211	0.0021827
			Dates	0.35	1	0.01	0	0.6632	0.23212		68.8513	2.47131	28.6774	0.159818	0.0057364	0.066566	0.159818	0.000229456	0.000223376
			Grapes (excluding wine)	6.24	11	0.12	0.03	1.214	7.57536		68.8513	2.47131	28.6774	5.21573	0.18721	2.17242	5.21573	0.00748841	0.00728999
			Fruits, other	21.86	34	0.44	0.51	0.75	16.395		68.8513	2.47131	28.6774	11.2882	0.405171	4.70166	11.2882	0.0162068	0.0157774
	Vegetables		Cassava	0	0	0	0	0.987	0	102.162	83.6105	0.362596	16.0269	0	0	0	0	0	0	62.476	0.111507	0.123818
			Potatoes	85.87	157	3.75	0.23	0.37	31.7719		59.711	1.6649	38.6241	18.9713	0.528971	12.2716	18.9713	0.0211588	0.0411799
			Sweet potatoes	0	0	0	0	0.365	0		65.672	2.57696	31.751	0	0	0	0	0	0
			Yams	0.04	0	0	0	0.365	0.0146		65.672	2.57696	31.751	0.00958811	0.000376237	0.00463565	0.00958811	1.50495e-05	1.55559e-05
			Roots, other	0	0	0	0	0.365	0		65.672	2.57696	31.751	0	0	0	0	0	0
			Tomatoes	16.26	16	0.72	0.17	1.427	23.203		53.5199	4.20609	42.274	12.4182	0.975939	9.80884	12.4182	0.0390376	0.0329156
			Onions	0.84	2	0.08	0.02	0.395	0.3318		71.3251	1.22109	27.4538	0.236657	0.00405158	0.0910918	0.236657	0.000162063	0.000305677
			Vegetables, other	92.58	95	3.44	0.63	0.455	42.1239		65.672	2.57696	31.751	27.6636	1.08552	13.3748	27.6636	0.0434207	0.0448818
			Aquatic plants	0	0	0	0	0	0		65.672	2.57696	31.751	0	0	0	0	0	0
			Beans	0.65	6	0.39	0.03	1.61	1.0465		75.1226	5.04344	19.834	0.786158	0.0527796	0.207563	0.786158	0.00211118	0.00069652
			Peas	1.8	17	1.11	0.09	0.896	1.6128		66.4257	5.15877	28.4155	1.07131	0.0832007	0.458285	1.07131	0.00332803	0.00153787
			Pulses, other	0.18	2	0.12	0.01	1.61	0.2898		65.672	2.57696	31.751	0.190317	0.00746804	0.0920145	0.190317	0.000298722	0.000308773
			Nuts	2.66	42	1.11	3.79	0.278	0.73948		62.5618	3.79852	33.6397	0.462632	0.0280893	0.248759	0.462632	0.00112357	0.00083476
			Soybeans	0.2	0	0.03	0	1.8925	0.3785		63.3478	1.20151	35.4507	0.239771	0.0045477	0.134181	0.239771	0.000181908	0.000450271
			Groundnuts (shelled equivalents)	0.26	3	0.14	0.28	2.497	0.64922		65.672	2.57696	31.751	0.426356	0.0167302	0.206134	0.426356	0.000669206	0.000691725
	Meat	Ruminant	Bovine meat	11.86	36	4.38	1.92	42.8	507.608	535.441	10.5	73	16.5	53.2988	370.554	83.7553	53.2988	14.8222	0.281058	58.949	15.4456	0.303194
			Mutton and goat meat	1.14	8	0.42	0.71	24.415	27.8331		20.3	56	23.7	5.65012	15.5865	6.59644	5.65012	0.623461	0.0221357
		Non-ruminant	Pig meat	28.35	114	6.84	9.39	7.282	206.445	450.066	47.5051	28.439	24.0559	98.0717	58.7109	49.6621	98.0717	2.34844	0.166651	221.653	4.00293	0.430671
			Poultry meat	11.51	40	4.06	2.51	6.092	70.1189		53.86	5.83151	40.3085	37.766	4.08899	28.2639	37.766	0.16356	0.0948452
			Meat, other	1.85	9	1.51	0.26	6.687	12.371		49.4604	21.4829	29.0567	6.11872	2.65764	3.59459	6.11872	0.106305	0.0120624
			Offals, edible	5.99	19	3	0.58	26.9	161.131		49.4604	21.4829	29.0567	79.6961	34.6156	46.8193	79.6961	1.38462	0.157112
	Seafood		Freshwater fish	6.8	12	1.82	0.47	4.005	27.234	77.6819	49.4604	21.4829	29.0567	13.4701	5.85065	7.9133	13.4701	0.234026	0.0265547	80.1614	0.427349	0.0472174
			Demersal fish	7.62	17	2.32	0.79	4.005	30.5181		78.6427	5.32556	16.0317	24.0003	1.62526	4.89257	24.0003	0.0650104	0.016418
			Pelagic fish	4.19	11	1.24	0.57	4.005	16.781		91.6865	7.21239	1.10113	15.3859	1.21031	0.18478	15.3859	0.0484123	0.000620068
			Marine fish, other	0.35	1	0.13	0.03	4.005	1.40175		89.095	4.66193	6.24304	1.24889	0.0653486	0.0875118	1.24889	0.00261395	0.000293664
			Crustaceans	1.13	1	0.23	0.02	7.3405	8.29476		89.095	4.66193	6.24304	7.39022	0.386696	0.517845	7.39022	0.0154679	0.00173774
			Cephalopods	0.29	1	0.11	0.01	7.3405	2.12874		89.095	4.66193	6.24304	1.89661	0.0992406	0.132898	1.89661	0.00396963	0.000445968
			Molluscs, other	2.51	1	0.21	0.02	7.3405	18.4247		90.3737	7.81574	1.81055	16.651	1.44002	0.333587	16.651	0.0576009	0.00111942
			Aquatic animals, others	0.02	0	0	0	6.6476	0.132952		89.095	4.66193	6.24304	0.118454	0.00619813	0.00830025	0.118454	0.000247925	2.78532e-05
	Dairy		Cream	15.15	81	1.12	8.01	2.781	42.1321	428.792	24.1	56.7	19.2	10.1538	23.8889	8.08937	10.1538	0.955557	0.0271455	96.6419	10.0078	0.27502
			Butter, ghee	5.25	121	0.15	13.71	2.781	14.6002		24.1	56.7	19.2	3.51866	8.27834	2.80325	3.51866	0.331134	0.00940687
			Milk (excluding butter) *includes cheese	103.35	423	28.82	24.78	3.6	372.06		22.3	58.6	19.1	82.9694	218.027	71.0635	82.9694	8.72109	0.238468
	Eggs		Eggs	7.22	28	2.19	2	4.507	32.5405	32.5405	41.5	6.5	52	13.5043	2.11514	16.9211	13.5043	0.0846054	0.0567822	13.5043	0.0846054	0.0567822
	Oils		Oilcrops, other	0	0	0	0	1.313	0	96.9197	61.4	13	25.6	0	0	0	0	0	0	61.8062	0.467835	0.0782696
			Soybean oil	4.24	103	0	11.61	6.117	25.9361		61.4	13	25.6	15.9248	3.37169	6.63964	15.9248	0.134868	0.0222807
			Groundnut oil	0	5	0	0.52	5.752	0		61.4	13	25.6	0	0	0	0	0	0
			Sunflowerseed oil	1.8	84	0.03	9.52	3.607	6.4926		61.4	13	25.6	3.98646	0.844038	1.66211	3.98646	0.0337615	0.00557754
			Rape and mustard oil	0	94	0.08	10.6	3.828	0		65.1	3.3	31.6	0	0	0	0	0	0
			Cottonseed oil	0	0	0	0	5.752	0		61.4	13	25.6	0	0	0	0	0	0
			Palmkernel oil	0	11	0.01	1.28	5.752	0		56.142	28.9894	14.8685	0	0	0	0	0	0
			Sesame seed oil	0	0	0	0.04	5.752	0		61.4	13	25.6	0	0	0	0	0	0
			Palm oil	0	105	0.09	11.84	7.605	0		61.4923	12.9177	25.59	0	0	0	0	0	0
			Coconut oil	0	15	0.01	1.72	5.752	0		61.4	13	25.6	0	0	0	0	0	0
			Olive Oil	1.25	30	0	3.41	5.944	7.43		89.1721	3.20831	7.61958	6.62549	0.238377	0.566135	6.62549	0.00953509	0.00189978
			Rice bran oil	0	0	0	0	5.752	0		61.4	13	25.6	0	0	0	0	0	0
			Maize germ oil	1.76	43	0	4.81	5.752	10.1235		61.4	13	25.6	6.21584	1.31606	2.59162	6.21584	0.0526423	0.00869672
			Oilcrops oil, other	1.79	37	0.01	4.38	5.752	10.2961		61.4	13	25.6	6.32179	1.33849	2.6358	6.32179	0.0535396	0.00884495
			Fats, animals, raw	5.21	222	0.02	24.67	6.733	35.0789		61.4	13	25.6	21.5385	4.56026	8.98021	21.5385	0.18241	0.0301349
			Fish, body oil	0	0	0	0	6.733	0		61.4	13	25.6	0	0	0	0	0	0
			Fish, liver oil	0	0	0	0	6.733	0		61.4	13	25.6	0	0	0	0	0	0
			Sunflower seed	0	0	0	0	1.313	0		61.4	13	25.6	0	0	0	0	0	0
			Rape and mustardseed	0	3	0	0	1.313	0		65.1	3.3	31.6	0	0	0	0	0	0
			Sesame seed	0	0	0	0	1.313	0		61.4923	12.9177	25.59	0	0	0	0	0	0
			Palm kernels	0	0	0	0	1.313	0		56.142	28.9894	14.8685	0	0	0	0	0	0
			Olives (including preserved)	0.64	2	0.02	0.2	1.313	0.84032		89.1721	3.20831	7.61958	0.749331	0.0269601	0.0640289	0.749331	0.0010784	0.000214862
			Coconuts (including copra)	0.55	9	0.1	0.93	1.313	0.72215		61.4923	12.9177	25.59	0.444067	0	0.184798	0.444067	0	0.000620128
	Beverages		Coffee	4.78	6	0.75	0	16.477	78.7601	219.243	53.6	0	46.4	42.2154	0	36.5447	42.2154	0	0.122633	167.699	0.0655342	0.168644
			Wine	28.2	56	0	0	1.585	44.697		79.6583	3.35563	17.7687	35.6049	1.49987	7.94209	35.6049	0.0599946	0.0266513
			Beer	80.93	109	1.11	0	1.109	89.7514		95	0	5	85.2638	0	4.48757	85.2638	0	0.015059
			Beverages, fermented	0.59	1	0	0	1.347	0.79473		82	3	15	0.651679	0.0238419	0.119209	0.651679	0.000953676	0.000400032
			Beverages, alcoholic	1.46	12	0	0	1.347	1.96662		82	3	15	1.61263	0.0589986	0.294993	1.61263	0.00235994	0.000989909
			Tea (including mate)	0.27	0	0.06	0	12.124	3.27348		71.8	1.7	26.5	2.35036	0.0556492	0.867472	2.35036	0.00222597	0.00291098
	Other		Sugar cane	0	0	0	0	2.672	0	74.393	74.1	1.1	24.8	0	0	0	0	0	0	30.9236	1.0574	0.0572577
			Sugar (non-centrifugal)	0	0	0	0	0.97	0		59.6	16.5	24	0	0	0	0	0	0
			Sugar beet	0	0	0	0	1.536	0		59.6	16.5	24	0	0	0	0	0	0
			Sugar (raw equivalent)	47.51	463	0	0	0.97	46.0847		30.4914	47.2261	22.2824	14.0519	21.764	10.2688	14.0519	0.870561	0.034459
			Sweeteners, other	14.61	28	0	0	0.97	14.1717		59.6	16.5	24	8.44633	2.33833	3.40121	8.44633	0.0935332	0.0114134
			Honey	0.45	4	0.01	0	0.97	0.4365		59.6	16.5	24	0.260154	0.0720225	0.10476	0.260154	0.0028809	0.000351544
			Cocoa beans	0	2	0.04	0.15	18.681	0		59.6	16.5	24	0	0	0	0	0	0
			Pepper	0.13	1	0.04	0.01	12.124	1.57612		59.6	16.5	24	0.939368	0.26006	0.378269	0.939368	0.0104024	0.00126936
			Pimento	0.13	1	0.04	0.06	12.124	1.57612		59.6	16.5	24	0.939368	0.26006	0.378269	0.939368	0.0104024	0.00126936
			Cloves	0	0	0	0	12.124	0		59.6	16.5	24	0	0	0	0	0	0
			Spices, other	0.87	8	0.26	0.36	12.124	10.5479		59.6	16.5	24	6.28654	1.7404	2.53149	6.28654	0.069616	0.00849494
			Infant food	0	0	0	0	2.781	0		24.6	56.4	19	0	0	0	0	0	0
			Miscellaneous	0	0	0	0	6.84227	0		59.6	16.5	24	0	0	0	0	0	0
Bosnia and Herzegovina	Grain products (non-rice)		Wheat	85.69	691	20.03	3.94	1.4	119.966	201.623	57.9	1.8	40.3	69.4603	2.15939	48.3463	69.4603	0.0863755	0.162236	127.303	0.152802	0.236714	3301000	3.16971e+09	1.19607e+08	6.56342e+06
			Barley	3.45	25	0.85	0.12	1.313	4.52985		54.569	1.91155	43.5195	2.47189	0.0865905	1.97137	2.47189	0.00346362	0.00661533
			Maize	74.73	609	14.1	2.01	0.988	73.8332		71.9	2.05597	26.1	53.0861	1.51799	19.2705	53.0861	0.0607197	0.064666
			Millet	0	0	0	0	1.313	0		61.8	1.8	36.4	0	0	0	0	0	0
			Rye	1.55	11	0.29	0.06	1.4	2.17		73.3007	1.65211	25.0472	1.59062	0.0358509	0.543525	1.59062	0.00143404	0.00182391
			Oats	0.13	1	0.06	0.02	1.575	0.20475		61.8	1.8	36.4	0.126535	0.0036855	0.074529	0.126535	0.00014742	0.000250097
			Sorghum	0	0	0	0	1.313	0		61.8	1.8	36.4	0	0	0	0	0	0
			Cereals, other	0.7	7	0.2	0.03	1.313	0.9191		61.8	1.8	36.4	0.568004	0.0165438	0.334552	0.568004	0.000661752	0.00112266
	Rice		Rice (milled equivalent)	2.98	19	0.36	0.04	3.839	11.4402	11.4402	22.2	71.8	6	2.53973	8.21408	0.686413	2.53973	0.328563	0.0023034	2.53973	0.328563	0.0023034
	Fruit		Oranges, mandarines	11.38	11	0.19	0.03	0.317	3.60746	73.8556	56.9055	1.22138	41.8731	2.05284	0.0440607	1.51056	2.05284	0.00176243	0.00506898	51.5889	0.0713302	0.0687364
			Lemons, limes	3.31	1	0.05	0.02	0.317	1.04927		56.3759	0	43.6241	0.591536	0	0.457734	0.591536	0	0.00153602
			Grapefruit	0.44	0	0	0	0.317	0.13948		68.8513	2.47131	28.6774	0.0960338	0.00344698	0.0399993	0.0960338	0.000137879	0.000134226
			Citrus, other	0.04	0	0	0	0.317	0.01268		68.8513	2.47131	28.6774	0.00873034	0.000313362	0.0036363	0.00873034	1.25345e-05	1.22023e-05
			Bananas	14.26	23	0.27	0.12	0.678	9.66828		79.4125	3.10136	17.4861	7.67782	0.299848	1.69061	7.67782	0.0119939	0.00567318
			Plantains	0.06	0	0	0	0.6632	0.039792		68.8513	2.47131	28.6774	0.0273973	0.000983382	0.0114113	0.0273973	3.93353e-05	3.8293e-05
			Apples	21.74	30	0.07	0.18	0.357	7.76118		72.4477	2.06109	25.4912	5.6228	0.159965	1.97842	5.6228	0.00639861	0.00663898
			Pineapples	0.55	1	0	0	0.6632	0.36476		68.8513	2.47131	28.6774	0.251142	0.00901434	0.104604	0.251142	0.000360573	0.000351019
			Dates	0.48	2	0.02	0	0.6632	0.318336		68.8513	2.47131	28.6774	0.219178	0.00786706	0.0912905	0.219178	0.000314682	0.000306344
			Grapes (excluding wine)	10.99	16	0.16	0.12	1.214	13.3419		68.8513	2.47131	28.6774	9.18604	0.329718	3.8261	9.18604	0.0131887	0.0128393
			Fruits, other	50.07	69	0.96	0.77	0.75	37.5525		68.8513	2.47131	28.6774	25.8554	0.928037	10.7691	25.8554	0.0371215	0.0361379
	Vegetables		Cassava	0	0	0	0	0.987	0	177.029	83.6105	0.362596	16.0269	0	0	0	0	0	0	111.944	0.19214	0.202287
			Potatoes	86.89	160	3.8	0.23	0.37	32.1493		59.711	1.6649	38.6241	19.1967	0.535254	12.4174	19.1967	0.0214102	0.0416691
			Sweet potatoes	0.01	0	0	0	0.365	0.00365		65.672	2.57696	31.751	0.00239703	9.40592e-05	0.00115891	0.00239703	3.76237e-06	3.88897e-06
			Yams	0	0	0	0	0.365	0		65.672	2.57696	31.751	0	0	0	0	0	0
			Roots, other	0	0	0	0	0.365	0		65.672	2.57696	31.751	0	0	0	0	0	0
			Tomatoes	19.09	11	0.52	0.13	1.427	27.2414		53.5199	4.20609	42.274	14.5796	1.1458	11.516	14.5796	0.0458319	0.0386444
			Onions	13.63	12	0.41	0.08	0.395	5.38385		71.3251	1.22109	27.4538	3.84004	0.0657418	1.47807	3.84004	0.00262967	0.00495998
			Vegetables, other	214.15	136	7.57	1.17	0.455	97.4383		65.672	2.57696	31.751	63.9897	2.51095	30.9376	63.9897	0.100438	0.103818
			Aquatic plants	0	0	0	0	0	0		65.672	2.57696	31.751	0	0	0	0	0	0
			Beans	4.39	41	2.66	0.2	1.61	7.0679		75.1226	5.04344	19.834	5.30959	0.356465	1.40185	5.30959	0.0142586	0.00470419
			Peas	0.53	5	0.33	0.03	0.896	0.47488		66.4257	5.15877	28.4155	0.315442	0.024498	0.13494	0.315442	0.000979919	0.000452817
			Pulses, other	1.35	13	0.75	0.16	1.61	2.1735		65.672	2.57696	31.751	1.42738	0.0560103	0.690108	1.42738	0.00224041	0.0023158
			Nuts	1.77	19	0.44	1.77	0.278	0.49206		62.5618	3.79852	33.6397	0.307842	0.018691	0.165527	0.307842	0.000747639	0.000555461
			Soybeans	1.1	10	1.14	0.54	1.8925	2.08175		63.3478	1.20151	35.4507	1.31874	0.0250124	0.737994	1.31874	0.00100049	0.00247649
			Groundnuts (shelled equivalents)	1.01	12	0.57	1.07	2.497	2.52197		65.672	2.57696	31.751	1.65623	0.0649902	0.800751	1.65623	0.00259961	0.00268708
	Meat	Ruminant	Bovine meat	12.32	76	4.97	6.07	42.8	527.296	538.771	10.5	73	16.5	55.3661	384.926	87.0038	55.3661	15.397	0.291959	57.6955	15.6541	0.301085
			Mutton and goat meat	0.47	3	0.17	0.29	24.415	11.475		20.3	56	23.7	2.32944	6.42603	2.71959	2.32944	0.257041	0.00912613
		Non-ruminant	Pig meat	9.81	85	3.25	7.82	7.282	71.4364	244.452	47.5051	28.439	24.0559	33.9359	20.3158	17.1847	33.9359	0.812634	0.0576667	124.806	1.54575	0.271818
			Poultry meat	19.76	66	6.72	4.15	6.092	120.378		53.86	5.83151	40.3085	64.8355	7.01985	48.5225	64.8355	0.280794	0.162827
			Meat, other	0.51	1	0.09	0.01	6.687	3.41037		49.4604	21.4829	29.0567	1.68678	0.732646	0.990941	1.68678	0.0293058	0.0033253
			Offals, edible	1.83	6	0.89	0.15	26.9	49.227		49.4604	21.4829	29.0567	24.3479	10.5754	14.3037	24.3479	0.423015	0.0479991
	Seafood		Freshwater fish	1.2	2	0.33	0.08	4.005	4.806	19.3903	49.4604	21.4829	29.0567	2.37707	1.03247	1.39646	2.37707	0.0412987	0.00468612	19.327	0.0884153	0.00892247
			Demersal fish	1.34	1	0.24	0.02	4.005	5.3667		78.6427	5.32556	16.0317	4.22052	0.285807	0.860373	4.22052	0.0114323	0.00288716
			Pelagic fish	2.22	6	0.64	0.3	4.005	8.8911		91.6865	7.21239	1.10113	8.15194	0.641261	0.0979027	8.15194	0.0256504	0.000328533
			Marine fish, other	0.75	2	0.33	0.1	4.005	3.00375		89.095	4.66193	6.24304	2.67619	0.140033	0.187525	2.67619	0.00560131	0.00062928
			Crustaceans	0.04	0	0.01	0	7.3405	0.29362		89.095	4.66193	6.24304	0.261601	0.0136884	0.0183308	0.261601	0.000547535	6.15128e-05
			Cephalopods	0.2	0	0.08	0.01	7.3405	1.4681		89.095	4.66193	6.24304	1.308	0.0684418	0.0916541	1.308	0.00273767	0.000307564
			Molluscs, other	0.05	0	0	0	7.3405	0.367025		90.3737	7.81574	1.81055	0.331694	0.0286857	0.00664516	0.331694	0.00114743	2.22992e-05
			Aquatic animals, others	0	0	0	0	6.6476	0		89.095	4.66193	6.24304	0	0	0	0	0	0
	Dairy		Cream	1.17	6	0.09	0.62	2.781	3.25377	699.683	24.1	56.7	19.2	0.784159	1.84489	0.624724	0.784159	0.0737955	0.00209639	156.116	16.3969	0.448471
			Butter, ghee	0.56	11	0.01	1.24	2.781	1.55736		24.1	56.7	19.2	0.375324	0.883023	0.299013	0.375324	0.0353209	0.0010034
			Milk (excluding butter) *includes cheese	193.02	316	17.55	18.46	3.6	694.872		22.3	58.6	19.1	154.956	407.195	132.721	154.956	16.2878	0.445371
	Eggs		Eggs	5.43	21	1.59	1.46	4.507	24.473	24.473	41.5	6.5	52	10.1563	1.59075	12.726	10.1563	0.0636298	0.0427046	10.1563	0.0636298	0.0427046
	Oils		Oilcrops, other	0.01	0	0	0.01	1.313	0.01313	48.653	61.4	13	25.6	0.00806182	0.0017069	0.00336128	0.00806182	6.8276e-05	1.12795e-05	30.593	0.242537	0.0402514
			Soybean oil	1.21	29	0	3.3	6.117	7.40157		61.4	13	25.6	4.54456	0.962204	1.8948	4.54456	0.0384882	0.0063584
			Groundnut oil	0	0	0	0	5.752	0		61.4	13	25.6	0	0	0	0	0	0
			Sunflowerseed oil	3.69	89	0	10.11	3.607	13.3098		61.4	13	25.6	8.17224	1.73028	3.40732	8.17224	0.0692111	0.0114339
			Rape and mustard oil	0	0	0	0	3.828	0		65.1	3.3	31.6	0	0	0	0	0	0
			Cottonseed oil	0	0	0	0	5.752	0		61.4	13	25.6	0	0	0	0	0	0
			Palmkernel oil	0	0	0	0	5.752	0		56.142	28.9894	14.8685	0	0	0	0	0	0
			Sesame seed oil	0	0	0	0	5.752	0		61.4	13	25.6	0	0	0	0	0	0
			Palm oil	1.56	38	0	4.27	7.605	11.8638		61.4923	12.9177	25.59	7.29532	1.53253	3.03594	7.29532	0.0613012	0.0101877
			Coconut oil	0	0	0	0	5.752	0		61.4	13	25.6	0	0	0	0	0	0
			Olive Oil	0.35	8	0	0.96	5.944	2.0804		89.1721	3.20831	7.61958	1.85514	0.0667457	0.158518	1.85514	0.00266983	0.000531939
			Rice bran oil	0	0	0	0	5.752	0		61.4	13	25.6	0	0	0	0	0	0
			Maize germ oil	0.1	3	0	0.29	5.752	0.5752		61.4	13	25.6	0.353173	0.074776	0.147251	0.353173	0.00299104	0.000494132
			Oilcrops oil, other	1.72	34	0.03	3.83	5.752	9.89344		61.4	13	25.6	6.07457	1.28615	2.53272	6.07457	0.0514459	0.00849906
			Fats, animals, raw	0.45	12	0.01	1.3	6.733	3.02985		61.4	13	25.6	1.86033	0.39388	0.775642	1.86033	0.0157552	0.00260282
			Fish, body oil	0	0	0	0	6.733	0		61.4	13	25.6	0	0	0	0	0	0
			Fish, liver oil	0	0	0	0.01	6.733	0		61.4	13	25.6	0	0	0	0	0	0
			Sunflower seed	0	0	0	0	1.313	0		61.4	13	25.6	0	0	0	0	0	0
			Rape and mustardseed	0	2	0	0	1.313	0		65.1	3.3	31.6	0	0	0	0	0	0
			Sesame seed	0	0	0	0	1.313	0		61.4923	12.9177	25.59	0	0	0	0	0	0
			Palm kernels	0	0	0	0	1.313	0		56.142	28.9894	14.8685	0	0	0	0	0	0
			Olives (including preserved)	0.36	1	0.01	0.14	1.313	0.47268		89.1721	3.20831	7.61958	0.421499	0.015165	0.0360162	0.421499	0.000606601	0.00012086
			Coconuts (including copra)	0.01	0	0	0.01	1.313	0.01313		61.4923	12.9177	25.59	0.00807394	0	0.00335997	0.00807394	0	1.12751e-05
	Beverages		Coffee	7.18	10	1.21	0	16.477	118.305	223.341	53.6	0	46.4	63.4114	0	54.8935	63.4114	0	0.184206	159.187	0.0361383	0.21237
			Wine	2.86	5	0	0	1.585	4.5331		79.6583	3.35563	17.7687	3.61099	0.152114	0.805475	3.61099	0.00608456	0.00270294
			Beer	67.9	91	0.93	0	1.109	75.3011		95	0	5	71.536	0	3.76506	71.536	0	0.0126344
			Beverages, fermented	1.05	1	0	0	1.347	1.41435		82	3	15	1.15977	0.0424305	0.212153	1.15977	0.00169722	0.000711921
			Beverages, alcoholic	17.39	141	0	0	1.347	23.4243		82	3	15	19.208	0.70273	3.51365	19.208	0.0281092	0.0117908
			Tea (including mate)	0.03	0	0.01	0	12.124	0.36372		71.8	1.7	26.5	0.261151	0.00618324	0.0963858	0.261151	0.00024733	0.000323442
	Other		Sugar cane	0	0	0	0	2.672	0	190.816	74.1	1.1	24.8	0	0	0	0	0	0	108.971	1.46124	0.152648
			Sugar (non-centrifugal)	0	0	0	0	0.97	0		59.6	16.5	24	0	0	0	0	0	0
			Sugar beet	0	0	0	0	1.536	0		59.6	16.5	24	0	0	0	0	0	0
			Sugar (raw equivalent)	15.74	150	0	0	0.97	15.2678		30.4914	47.2261	22.2824	4.65537	7.21039	3.40204	4.65537	0.288416	0.0114162
			Sweeteners, other	12.84	17	0	0	0.97	12.4548		59.6	16.5	24	7.42306	2.05504	2.98915	7.42306	0.0822017	0.0100307
			Honey	1.02	8	0.01	0	0.97	0.9894		59.6	16.5	24	0.589682	0.163251	0.237456	0.589682	0.00653004	0.000796832
			Cocoa beans	0	41	0.56	3.66	18.681	0		59.6	16.5	24	0	0	0	0	0	0
			Pepper	0.06	0	0.02	0	12.124	0.72744		59.6	16.5	24	0.433554	0.120028	0.174586	0.433554	0.0048011	0.000585858
			Pimento	7.89	69	2.59	3.74	12.124	95.6584		59.6	16.5	24	57.0124	15.7836	22.958	57.0124	0.631345	0.0770403
			Cloves	0	0	0	0	12.124	0		59.6	16.5	24	0	0	0	0	0	0
			Spices, other	0.33	3	0.12	0.11	12.124	4.00092		59.6	16.5	24	2.38455	0.660152	0.960221	2.38455	0.0264061	0.00322222
			Infant food	0.32	3	0.13	0.03	2.781	0.88992		24.6	56.4	19	0.21892	0.501915	0.169085	0.21892	0.0200766	0.000567399
			Miscellaneous	8.89	10	0.29	0.12	6.84227	60.8278		59.6	16.5	24	36.2534	10.0366	14.5987	36.2534	0.401464	0.0489888
Bulgaria	Grain products (non-rice)		Wheat	97.49	774	24.44	2.82	1.4	136.486	167.463	57.9	1.8	40.3	79.0254	2.45675	55.0039	79.0254	0.0982699	0.184577	101.142	0.12362	0.212236	7000000	6.13067e+09	1.64999e+08	1.17737e+07
			Barley	0.43	3	0.07	0.01	1.313	0.56459		54.569	1.91155	43.5195	0.308091	0.0107924	0.245707	0.308091	0.000431698	0.000824519
			Maize	29.98	222	5.13	0.73	0.988	29.6202		71.9	2.05597	26.1	21.297	0.608984	7.73088	21.297	0.0243594	0.0259426
			Millet	0	0	0	0	1.313	0		61.8	1.8	36.4	0	0	0	0	0	0
			Rye	0.14	1	0.02	0	1.4	0.196		73.3007	1.65211	25.0472	0.143669	0.00323814	0.0490925	0.143669	0.000129526	0.00016474
			Oats	0.27	3	0.12	0.05	1.575	0.42525		61.8	1.8	36.4	0.262804	0.0076545	0.154791	0.262804	0.00030618	0.000519433
			Sorghum	0	0	0	0	1.313	0		61.8	1.8	36.4	0	0	0	0	0	0
			Cereals, other	0.13	1	0.04	0	1.313	0.17069		61.8	1.8	36.4	0.105486	0.00307242	0.0621312	0.105486	0.000122897	0.000208494
	Rice		Rice (milled equivalent)	3.37	26	0.54	0.12	3.839	12.9374	12.9374	22.2	71.8	6	2.87211	9.28907	0.776246	2.87211	0.371563	0.00260485	2.87211	0.371563	0.00260485
	Fruit		Oranges, mandarines	8.85	9	0.15	0.03	0.317	2.80545	38.4179	56.9055	1.22138	41.8731	1.59645	0.0342652	1.17473	1.59645	0.00137061	0.00394205	26.5194	0.0365879	0.0368583
			Lemons, limes	2.08	1	0.02	0.02	0.317	0.65936		56.3759	0	43.6241	0.37172	0	0.28764	0.37172	0	0.000965233
			Grapefruit	1.62	2	0.03	0.01	0.317	0.51354		68.8513	2.47131	28.6774	0.353579	0.0126911	0.14727	0.353579	0.000507646	0.000494195
			Citrus, other	0.15	0	0	0	0.317	0.04755		68.8513	2.47131	28.6774	0.0327388	0.00117511	0.0136361	0.0327388	4.70042e-05	4.57588e-05
			Bananas	5.79	10	0.13	0.02	0.678	3.92562		79.4125	3.10136	17.4861	3.11743	0.121747	0.686439	3.11743	0.0048699	0.00230349
			Plantains	1.26	3	0.03	0.01	0.6632	0.835632		68.8513	2.47131	28.6774	0.575343	0.020651	0.239638	0.575343	0.000826041	0.000804153
			Apples	5.53	7	0.03	0.03	0.357	1.97421		72.4477	2.06109	25.4912	1.43027	0.0406903	0.503249	1.43027	0.00162761	0.00168876
			Pineapples	0.29	0	0	0	0.6632	0.192328		68.8513	2.47131	28.6774	0.13242	0.00475301	0.0551547	0.13242	0.000190121	0.000185083
			Dates	0.24	2	0.01	0	0.6632	0.159168		68.8513	2.47131	28.6774	0.109589	0.00393353	0.0456453	0.109589	0.000157341	0.000153172
			Grapes (excluding wine)	6.25	6	0.06	0.02	1.214	7.5875		68.8513	2.47131	28.6774	5.22409	0.18751	2.1759	5.22409	0.00750041	0.00730167
			Fruits, other	26.29	64	0.83	0.39	0.75	19.7175		68.8513	2.47131	28.6774	13.5758	0.48728	5.65447	13.5758	0.0194912	0.0189747
	Vegetables		Cassava	0	0	0	0	0.987	0	92.1355	83.6105	0.362596	16.0269	0	0	0	0	0	0	55.0298	0.120485	0.114408
			Potatoes	27.08	51	1.17	0.07	0.37	10.0196		59.711	1.6649	38.6241	5.9828	0.166817	3.86998	5.9828	0.00667266	0.0129865
			Sweet potatoes	0	0	0	0	0.365	0		65.672	2.57696	31.751	0	0	0	0	0	0
			Yams	0	0	0	0	0.365	0		65.672	2.57696	31.751	0	0	0	0	0	0
			Roots, other	0	0	0	0	0.365	0		65.672	2.57696	31.751	0	0	0	0	0	0
			Tomatoes	30.41	15	0.75	0.17	1.427	43.3951		53.5199	4.20609	42.274	23.225	1.82523	18.3448	23.225	0.0730094	0.0615598
			Onions	8.12	9	0.27	0.04	0.395	3.2074		71.3251	1.22109	27.4538	2.28768	0.0391653	0.880554	2.28768	0.00156661	0.00295488
			Vegetables, other	58.07	29	1.32	0.29	0.455	26.4219		65.672	2.57696	31.751	17.3518	0.680881	8.38921	17.3518	0.0272353	0.0281517
			Aquatic plants	0	0	0	0	0	0		65.672	2.57696	31.751	0	0	0	0	0	0
			Beans	1.47	14	0.85	0.06	1.61	2.3667		75.1226	5.04344	19.834	1.77793	0.119363	0.469411	1.77793	0.00477452	0.00157521
			Peas	0.14	1	0.09	0.01	0.896	0.12544		66.4257	5.15877	28.4155	0.0833244	0.00647116	0.0356444	0.0833244	0.000258847	0.000119612
			Pulses, other	0.52	5	0.33	0.02	1.61	0.8372		65.672	2.57696	31.751	0.549806	0.0215743	0.26582	0.549806	0.000862973	0.000892012
			Nuts	1.37	9	0.26	0.77	0.278	0.38086		62.5618	3.79852	33.6397	0.238273	0.014467	0.12812	0.238273	0.000578681	0.000429933
			Soybeans	0.02	0	0.01	0	1.8925	0.03785		63.3478	1.20151	35.4507	0.0239771	0.00045477	0.0134181	0.0239771	1.81908e-05	4.50271e-05
			Groundnuts (shelled equivalents)	2.14	24	1.08	2.02	2.497	5.34358		65.672	2.57696	31.751	3.50924	0.137702	1.69664	3.50924	0.00550808	0.00569343
	Meat	Ruminant	Bovine meat	3.49	11	1.34	0.57	42.8	149.372	185.994	10.5	73	16.5	15.6841	109.042	24.6464	15.6841	4.36166	0.082706	23.1184	5.18201	0.111832
			Mutton and goat meat	1.5	9	0.53	0.75	24.415	36.6225		20.3	56	23.7	7.43437	20.5086	8.67953	7.43437	0.820344	0.0291259
		Non-ruminant	Pig meat	31.79	147	8.75	12.15	7.282	231.495	480.871	47.5051	28.439	24.0559	109.972	65.8349	55.6881	109.972	2.6334	0.186873	239.39	3.9117	0.482174
			Poultry meat	22.67	85	8.91	5.25	6.092	138.106		53.86	5.83151	40.3085	74.3837	8.05365	55.6683	74.3837	0.322146	0.186806
			Meat, other	0.75	2	0.37	0.1	6.687	5.01525		49.4604	21.4829	29.0567	2.48056	1.07742	1.45727	2.48056	0.0430968	0.00489015
			Offals, edible	3.95	13	2.03	0.39	26.9	106.255		49.4604	21.4829	29.0567	52.5542	22.8266	30.8742	52.5542	0.913066	0.103605
	Seafood		Freshwater fish	1.96	3	0.55	0.13	4.005	7.8498	24.1512	49.4604	21.4829	29.0567	3.88254	1.68636	2.28089	3.88254	0.0674545	0.007654	25.3029	0.127108	0.0118134
			Demersal fish	1.01	2	0.24	0.08	4.005	4.04505		78.6427	5.32556	16.0317	3.18114	0.215422	0.64849	3.18114	0.00861687	0.00217614
			Pelagic fish	3.02	9	1.12	0.41	4.005	12.0951		91.6865	7.21239	1.10113	11.0896	0.872345	0.133183	11.0896	0.0348938	0.000446923
			Marine fish, other	0.34	1	0.09	0.02	4.005	1.3617		89.095	4.66193	6.24304	1.21321	0.0634815	0.0850115	1.21321	0.00253926	0.000285273
			Crustaceans	0.4	1	0.12	0.01	7.3405	2.9362		89.095	4.66193	6.24304	2.61601	0.136884	0.183308	2.61601	0.00547535	0.000615128
			Cephalopods	0.24	1	0.1	0.01	7.3405	1.76172		89.095	4.66193	6.24304	1.5696	0.0821302	0.109985	1.5696	0.00328521	0.000369077
			Molluscs, other	0.13	0	0.02	0	7.3405	0.954265		90.3737	7.81574	1.81055	0.862405	0.0745829	0.0172774	0.862405	0.00298331	5.79779e-05
			Aquatic animals, others	0.15	0	0.02	0	6.6476	0.99714		89.095	4.66193	6.24304	0.888402	0.046486	0.0622518	0.888402	0.00185944	0.000208899
	Dairy		Cream	0.01	0	0	0.01	2.781	0.02781	512.916	24.1	56.7	19.2	0.00670221	0.0157683	0.00533952	0.00670221	0.000630731	1.79179e-05	114.434	12.0205	0.328758
			Butter, ghee	1.06	21	0.03	2.36	2.781	2.94786		24.1	56.7	19.2	0.710434	1.67144	0.565989	0.710434	0.0668575	0.00189929
			Milk (excluding butter) *includes cheese	141.65	251	14.83	15.67	3.6	509.94		22.3	58.6	19.1	113.717	298.825	97.3985	113.717	11.953	0.326841
	Eggs		Eggs	8.36	32	2.6	2.26	4.507	37.6785	37.6785	41.5	6.5	52	15.6366	2.4491	19.5928	15.6366	0.0979642	0.0657478	15.6366	0.0979642	0.0657478
	Oils		Oilcrops, other	0	0	0	0	1.313	0	159.747	61.4	13	25.6	0	0	0	0	0	0	99.3883	0.809948	0.13454
			Soybean oil	1.73	42	0	4.73	6.117	10.5824		61.4	13	25.6	6.4976	1.37571	2.7091	6.4976	0.0550285	0.00909093
			Groundnut oil	0	0	0	0	5.752	0		61.4	13	25.6	0	0	0	0	0	0
			Sunflowerseed oil	10.75	305	0.04	34.44	3.607	38.7752		61.4	13	25.6	23.808	5.04078	9.92646	23.808	0.201631	0.0333103
			Rape and mustard oil	0	0	0	0	3.828	0		65.1	3.3	31.6	0	0	0	0	0	0
			Cottonseed oil	0	0	0	0	5.752	0		61.4	13	25.6	0	0	0	0	0	0
			Palmkernel oil	0	0	0	0	5.752	0		56.142	28.9894	14.8685	0	0	0	0	0	0
			Sesame seed oil	0	0	0	0	5.752	0		61.4	13	25.6	0	0	0	0	0	0
			Palm oil	11	0.01	1.24	0	7.605	83.655		61.4923	12.9177	25.59	51.4414	10.8063	21.4073	51.4414	0.432252	0.0718366
			Coconut oil	0	0	0	0	5.752	0		61.4	13	25.6	0	0	0	0	0	0
			Olive Oil	0.29	7	0	0.8	5.944	1.72376		89.1721	3.20831	7.61958	1.53711	0.0553035	0.131343	1.53711	0.00221214	0.000440749
			Rice bran oil	0	0	0	0	5.752	0		61.4	13	25.6	0	0	0	0	0	0
			Maize germ oil	0.91	22	0	2.5	5.752	5.23432		61.4	13	25.6	3.21387	0.680462	1.33999	3.21387	0.0272185	0.0044966
			Oilcrops oil, other	0.15	4	0	0.43	5.752	0.8628		61.4	13	25.6	0.529759	0.112164	0.220877	0.529759	0.00448656	0.000741197
			Fats, animals, raw	1.99	116	0.31	12.74	6.733	13.3987		61.4	13	25.6	8.22678	1.74183	3.43006	8.22678	0.0696731	0.0115103
			Fish, body oil	0	0	0	0	6.733	0		61.4	13	25.6	0	0	0	0	0	0
			Fish, liver oil	0	0	0	0	6.733	0		61.4	13	25.6	0	0	0	0	0	0
			Sunflower seed	1.92	16	0.65	1.41	1.313	2.52096		61.4	13	25.6	1.54787	0.327725	0.645366	1.54787	0.013109	0.00216566
			Rape and mustardseed	0	3	0	0	1.313	0		65.1	3.3	31.6	0	0	0	0	0	0
			Sesame seed	0.13	2	0.06	0.18	1.313	0.17069		61.4923	12.9177	25.59	0.104961	0.0220492	0.0436795	0.104961	0.000881969	0.000146576
			Palm kernels	0	0	0	0	1.313	0		56.142	28.9894	14.8685	0	0	0	0	0	0
			Olives (including preserved)	2.05	6	0.06	0.63	1.313	2.69165		89.1721	3.20831	7.61958	2.4002	0.0863564	0.205092	2.4002	0.00345426	0.00068823
			Coconuts (including copra)	0.1	2	0.02	0.15	1.313	0.1313		61.4923	12.9177	25.59	0.0807394	0	0.0335997	0.0807394	0	0.000112751
	Beverages		Coffee	3.89	7	0.63	0	16.477	64.0955	181.776	53.6	0	46.4	34.3552	0	29.7403	34.3552	0	0.0997998	142.125	0.0336279	0.130803
			Wine	13.61	27	0	0	1.585	21.5718		79.6583	3.35563	17.7687	17.1838	0.723871	3.83305	17.1838	0.0289549	0.0128626
			Beer	82.63	111	1.13	0	1.109	91.6367		95	0	5	87.0548	0	4.58183	87.0548	0	0.0153753
			Beverages, fermented	0.05	0	0	0	1.347	0.06735		82	3	15	0.055227	0.0020205	0.0101025	0.055227	8.082e-05	3.3901e-05
			Beverages, alcoholic	2.28	18	0	0	1.347	3.07116		82	3	15	2.51835	0.0921348	0.460674	2.51835	0.00368539	0.00154589
			Tea (including mate)	0.11	0	0.02	0	12.124	1.33364		71.8	1.7	26.5	0.957554	0.0226719	0.353415	0.957554	0.000906875	0.00118596
	Other		Sugar cane	0	0	0	0	2.672	0	64.1701	74.1	1.1	24.8	0	0	0	0	0	0	30.8514	0.736211	0.0501755
			Sugar (non-centrifugal)	0	0	0	0	0.97	0		59.6	16.5	24	0	0	0	0	0	0
			Sugar beet	0	0	0	0	1.536	0		59.6	16.5	24	0	0	0	0	0	0
			Sugar (raw equivalent)	25.67	249	0	0	0.97	24.8999		30.4914	47.2261	22.2824	7.59233	11.7593	5.5483	7.59233	0.470371	0.0186185
			Sweeteners, other	8.76	13	0	0	0.97	8.4972		59.6	16.5	24	5.06433	1.40204	2.03933	5.06433	0.0560815	0.00684338
			Honey	0.14	1	0	0	0.97	0.1358		59.6	16.5	24	0.0809368	0.022407	0.032592	0.0809368	0.00089628	0.000109369
			Cocoa beans	0	5	0.33	0.37	18.681	0		59.6	16.5	24	0	0	0	0	0	0
			Pepper	0	0	0	0	12.124	0		59.6	16.5	24	0	0	0	0	0	0
			Pimento	0.44	4	0.15	0.21	12.124	5.33456		59.6	16.5	24	3.1794	0.880202	1.28029	3.1794	0.0352081	0.00429629
			Cloves	0	0	0	0	12.124	0		59.6	16.5	24	0	0	0	0	0	0
			Spices, other	0.32	3	0.11	0.12	12.124	3.87968		59.6	16.5	24	2.31229	0.640147	0.931123	2.31229	0.0256059	0.00312457
			Infant food	0.15	1	0.06	0.01	2.781	0.41715		24.6	56.4	19	0.102619	0.235273	0.0792585	0.102619	0.0094109	0.000265968
			Miscellaneous	3.07	3	0.1	0.04	6.84227	21.0058		59.6	16.5	24	12.5194	3.46595	5.04139	12.5194	0.138638	0.0169174
Croatia	Grain products (non-rice)		Wheat	92.21	684	19.21	6.44	1.4	129.094	141.394	57.9	1.8	40.3	74.7454	2.32369	52.0249	74.7454	0.0929477	0.17458	83.2837	0.102683	0.186404	4130000	4.43616e+09	1.77034e+08	8.87899e+06
			Barley	0.83	5	0.14	0.02	1.313	1.08979		54.569	1.91155	43.5195	0.594687	0.0208319	0.474271	0.594687	0.000833277	0.00159151
			Maize	8.87	71	1.63	0.23	0.988	8.76356		71.9	2.05597	26.1	6.301	0.180177	2.28729	6.301	0.00720706	0.00767547
			Millet	0	0	0	0	1.313	0		61.8	1.8	36.4	0	0	0	0	0	0
			Rye	0.81	6	0.16	0.03	1.4	1.134		73.3007	1.65211	25.0472	0.83123	0.018735	0.284035	0.83123	0.000749399	0.000953139
			Oats	0.25	3	0.11	0.04	1.575	0.39375		61.8	1.8	36.4	0.243337	0.0070875	0.143325	0.243337	0.0002835	0.000480956
			Sorghum	0	0	0	0	1.313	0		61.8	1.8	36.4	0	0	0	0	0	0
			Cereals, other	0.7	7	0.18	0.02	1.313	0.9191		61.8	1.8	36.4	0.568004	0.0165438	0.334552	0.568004	0.000661752	0.00112266
	Rice		Rice (milled equivalent)	2.5	25	0.46	0.05	3.839	9.5975	9.5975	22.2	71.8	6	2.13064	6.891	0.57585	2.13064	0.27564	0.00193238	2.13064	0.27564	0.00193238
	Fruit		Oranges, mandarines	11.73	12	0.22	0.03	0.317	3.71841	57.5226	56.9055	1.22138	41.8731	2.11598	0.0454159	1.55702	2.11598	0.00181663	0.00522488	40.2915	0.0552813	0.0531849
			Lemons, limes	3.42	1	0.06	0.02	0.317	1.08414		56.3759	0	43.6241	0.611194	0	0.472946	0.611194	0	0.00158707
			Grapefruit	0.6	0	0.01	0	0.317	0.1902		68.8513	2.47131	28.6774	0.130955	0.00470042	0.0545444	0.130955	0.000188017	0.000183035
			Citrus, other	0.08	0	0	0	0.317	0.02536		68.8513	2.47131	28.6774	0.0174607	0.000626723	0.00727259	0.0174607	2.50689e-05	2.44047e-05
			Bananas	14.32	24	0.27	0.12	0.678	9.70896		79.4125	3.10136	17.4861	7.71013	0.301109	1.69772	7.71013	0.0120444	0.00569705
			Plantains	0.35	1	0.01	0	0.6632	0.23212		68.8513	2.47131	28.6774	0.159818	0.0057364	0.066566	0.159818	0.000229456	0.000223376
			Apples	18.73	25	0.05	0.15	0.357	6.68661		72.4477	2.06109	25.4912	4.8443	0.137817	1.70449	4.8443	0.00551269	0.00571978
			Pineapples	1.28	1	0.01	0	0.6632	0.848896		68.8513	2.47131	28.6774	0.584476	0.0209788	0.243441	0.584476	0.000839153	0.000816918
			Dates	0.06	0	0	0	0.6632	0.039792		68.8513	2.47131	28.6774	0.0273973	0.000983382	0.0114113	0.0273973	3.93353e-05	3.8293e-05
			Grapes (excluding wine)	19.01	28	0.27	0.2	1.214	23.0781		68.8513	2.47131	28.6774	15.8896	0.570332	6.61821	15.8896	0.0228133	0.0222088
			Fruits, other	15.88	21	0.29	0.23	0.75	11.91		68.8513	2.47131	28.6774	8.20019	0.294333	3.41548	8.20019	0.0117733	0.0114613
	Vegetables		Cassava	0	0	0	0	0.987	0	168.072	83.6105	0.362596	16.0269	0	0	0	0	0	0	107.689	0.178376	0.187664
			Potatoes	39.09	74	1.73	0.1	0.37	14.4633		59.711	1.6649	38.6241	8.63618	0.2408	5.58632	8.63618	0.00963199	0.0187461
			Sweet potatoes	0.04	0	0	0	0.365	0.0146		65.672	2.57696	31.751	0.00958811	0.000376237	0.00463565	0.00958811	1.50495e-05	1.55559e-05
			Yams	0	0	0	0	0.365	0		65.672	2.57696	31.751	0	0	0	0	0	0
			Roots, other	0	0	0	0	0.365	0		65.672	2.57696	31.751	0	0	0	0	0	0
			Tomatoes	12.33	11	0.49	0.12	1.427	17.5949		53.5199	4.20609	42.274	9.41679	0.740057	7.43807	9.41679	0.0296023	0.02496
			Onions	10.88	9	0.33	0.06	0.395	4.2976		71.3251	1.22109	27.4538	3.06527	0.0524776	1.17986	3.06527	0.00209911	0.00395925
			Vegetables, other	278.75	115	4.11	0.85	0.455	126.831		65.672	2.57696	31.751	83.2926	3.26839	40.2702	83.2926	0.130736	0.135135
			Aquatic plants	0	0	0	0	0	0		65.672	2.57696	31.751	0	0	0	0	0	0
			Beans	0.6	6	0.36	0.03	1.61	0.966		75.1226	5.04344	19.834	0.725684	0.0487196	0.191596	0.725684	0.00194879	0.000642941
			Peas	0	0	0	0	0.896	0		66.4257	5.15877	28.4155	0	0	0	0	0	0
			Pulses, other	0.15	1	0.09	0.01	1.61	0.2415		65.672	2.57696	31.751	0.158598	0.00622337	0.0766787	0.158598	0.000248935	0.000257311
			Nuts	2.42	23	0.57	2.11	0.278	0.67276		62.5618	3.79852	33.6397	0.420891	0.0255549	0.226314	0.420891	0.0010222	0.000759443
			Soybeans	0.01	0	0	0	1.8925	0.018925		63.3478	1.20151	35.4507	0.0119886	0.000227385	0.00670904	0.0119886	9.0954e-06	2.25136e-05
			Groundnuts (shelled equivalents)	1.19	13	0.61	1.16	2.497	2.97143		65.672	2.57696	31.751	1.9514	0.0765727	0.943459	1.9514	0.00306291	0.00316597
	Meat	Ruminant	Bovine meat	12.66	76	5.22	5.92	42.8	541.848	577.982	10.5	73	16.5	56.894	395.549	89.4049	56.894	15.822	0.300017	64.2293	16.6314	0.328754
			Mutton and goat meat	1.48	10	0.55	0.87	24.415	36.1342		20.3	56	23.7	7.33524	20.2352	8.56381	7.33524	0.809406	0.0287376
		Non-ruminant	Pig meat	52.13	217	12.62	18.06	7.282	379.611	564.616	47.5051	28.439	24.0559	180.334	107.958	91.3187	180.334	4.31831	0.306439	275.151	5.43668	0.515259
			Poultry meat	12.36	43	4.7	2.58	6.092	75.2971		53.86	5.83151	40.3085	40.555	4.39096	30.3511	40.555	0.175638	0.101849
			Meat, other	1.16	4	0.9	0.06	6.687	7.75692		49.4604	21.4829	29.0567	3.83661	1.66641	2.2539	3.83661	0.0666564	0.00756344
			Offals, edible	3.79	15	1.7	0.3	26.9	101.951		49.4604	21.4829	29.0567	50.4254	21.902	29.6236	50.4254	0.876081	0.099408
	Seafood		Freshwater fish	1.3	2	0.35	0.08	4.005	5.2065	85.0371	49.4604	21.4829	29.0567	2.57516	1.11851	1.51284	2.57516	0.0447403	0.00507663	77.5447	0.249136	0.0217132
			Demersal fish	4.22	5	0.86	0.12	4.005	16.9011		78.6427	5.32556	16.0317	13.2915	0.900079	2.70953	13.2915	0.0360031	0.00909239
			Pelagic fish	8.87	22	3.06	0.98	4.005	35.5243		91.6865	7.21239	1.10113	32.571	2.56215	0.39117	32.571	0.102486	0.00131265
			Marine fish, other	0.08	0	0.02	0.01	4.005	0.3204		89.095	4.66193	6.24304	0.28546	0.0149368	0.0200027	0.28546	0.000597473	6.71232e-05
			Crustaceans	0.88	1	0.22	0.01	7.3405	6.45964		89.095	4.66193	6.24304	5.75522	0.301144	0.403278	5.75522	0.0120458	0.00135328
			Cephalopods	2.96	6	1.22	0.1	7.3405	21.7279		89.095	4.66193	6.24304	19.3585	1.01294	1.35648	19.3585	0.0405176	0.00455195
			Molluscs, other	0.55	0	0.05	0.01	7.3405	4.03728		90.3737	7.81574	1.81055	3.64864	0.315543	0.0730967	3.64864	0.0126217	0.000245291
			Aquatic animals, others	0.01	0	0	0	6.6476	0.066476		89.095	4.66193	6.24304	0.0592268	0.00309907	0.00415012	0.0592268	0.000123963	1.39266e-05
	Dairy		Cream	0	0	0	0	2.781	0	793.751	24.1	56.7	19.2	0	0	0	0	0	0	177.082	18.6023	0.508761
			Butter, ghee	1.51	30	0.04	3.36	2.781	4.19931		24.1	56.7	19.2	1.01203	2.38101	0.806268	1.01203	0.0952404	0.0027056
			Milk (excluding butter) *includes cheese	219.32	335	20.82	20.05	3.6	789.552		22.3	58.6	19.1	176.07	462.677	150.804	176.07	18.5071	0.506055
	Eggs		Eggs	10.83	41	3.18	2.91	4.507	48.8108	48.8108	41.5	6.5	52	20.2565	3.1727	25.3816	20.2565	0.126908	0.0851732	20.2565	0.126908	0.0851732
	Oils		Oilcrops, other	0.29	4	0.14	0.35	1.313	0.38077	59.0759	61.4	13	25.6	0.233793	0.0495001	0.0974771	0.233793	0.00198	0.000327104	38.556	0.272742	0.0457898
			Soybean oil	0.23	8	0	0.93	6.117	1.40691		61.4	13	25.6	0.863843	0.182898	0.360169	0.863843	0.00731593	0.00120862
			Groundnut oil	0	0	0	0.01	5.752	0		61.4	13	25.6	0	0	0	0	0	0
			Sunflowerseed oil	4.16	101	0	11.39	3.607	15.0051		61.4	13	25.6	9.21314	1.95067	3.84131	9.21314	0.0780266	0.0128903
			Rape and mustard oil	0	0	0	0	3.828	0		65.1	3.3	31.6	0	0	0	0	0	0
			Cottonseed oil	0	0	0	0	5.752	0		61.4	13	25.6	0	0	0	0	0	0
			Palmkernel oil	0	0	0	0	5.752	0		56.142	28.9894	14.8685	0	0	0	0	0	0
			Sesame seed oil	0	0	0	0.01	5.752	0		61.4	13	25.6	0	0	0	0	0	0
			Palm oil	0	60	0.05	6.72	7.605	0		61.4923	12.9177	25.59	0	0	0	0	0	0
			Coconut oil	0	0	0	0	5.752	0		61.4	13	25.6	0	0	0	0	0	0
			Olive Oil	0.76	18	0	2.09	5.944	4.51744		89.1721	3.20831	7.61958	4.0283	0.144933	0.34421	4.0283	0.00579734	0.00115507
			Rice bran oil	0	0	0	0	5.752	0		61.4	13	25.6	0	0	0	0	0	0
			Maize germ oil	2.05	50	0	5.62	5.752	11.7916		61.4	13	25.6	7.24004	1.53291	3.01865	7.24004	0.0613163	0.0101297
			Oilcrops oil, other	0.44	9	0	1.05	5.752	2.53088		61.4	13	25.6	1.55396	0.329014	0.647905	1.55396	0.0131606	0.00217418
			Fats, animals, raw	2.85	119	0.21	13.17	6.733	19.189		61.4	13	25.6	11.7821	2.49458	4.9124	11.7821	0.0997831	0.0164846
			Fish, body oil	0	0	0	0	6.733	0		61.4	13	25.6	0	0	0	0	0	0
			Fish, liver oil	0	0	0	0	6.733	0		61.4	13	25.6	0	0	0	0	0	0
			Sunflower seed	0	0	0	0	1.313	0		61.4	13	25.6	0	0	0	0	0	0
			Rape and mustardseed	0	2	0	0	1.313	0		65.1	3.3	31.6	0	0	0	0	0	0
			Sesame seed	0.09	1	0.04	0.12	1.313	0.11817		61.4923	12.9177	25.59	0.0726655	0.0152649	0.0302397	0.0726655	0.000610594	0.000101475
			Palm kernels	0	0	0	0	1.313	0		56.142	28.9894	14.8685	0	0	0	0	0	0
			Olives (including preserved)	2.82	13	0.1	1.27	1.313	3.70266		89.1721	3.20831	7.61958	3.30174	0.118793	0.282127	3.30174	0.00475171	0.000946736
			Coconuts (including copra)	0.33	1	0.01	0.11	1.313	0.43329		61.4923	12.9177	25.59	0.26644	0	0.110879	0.26644	0	0.000372077
	Beverages		Coffee	5.01	8	0.95	0	16.477	82.5498	205.137	53.6	0	46.4	44.2467	0	38.3031	44.2467	0	0.128534	156.471	0.0362045	0.16085
			Wine	13.92	27	0	0	1.585	22.0632		79.6583	3.35563	17.7687	17.5752	0.740359	3.92035	17.5752	0.0296144	0.0131555
			Beer	85.36	115	1.17	0	1.109	94.6642		95	0	5	89.931	0	4.73321	89.931	0	0.0158833
			Beverages, fermented	3.72	30	0	0	1.347	5.01084		82	3	15	4.10889	0.150325	0.751626	4.10889	0.00601301	0.00252223
			Beverages, alcoholic	0	0	0	0	1.347	0		82	3	15	0	0	0	0	0	0
			Tea (including mate)	0.07	0	0.01	0	12.124	0.84868		71.8	1.7	26.5	0.609352	0.0144276	0.2249	0.609352	0.000577102	0.000754699
	Other		Sugar cane	0	0	0	0	2.672	0	70.0723	74.1	1.1	24.8	0	0	0	0	0	0	31.4459	0.898098	0.0543912
			Sugar (non-centrifugal)	0	0	0	0	0.97	0		59.6	16.5	24	0	0	0	0	0	0
			Sugar beet	0	0	0	0	1.536	0		59.6	16.5	24	0	0	0	0	0	0
			Sugar (raw equivalent)	36.54	359	0	0	0.97	35.4438		30.4914	47.2261	22.2824	10.8073	16.7387	7.89774	10.8073	0.66955	0.0265025
			Sweeteners, other	27.6	83	0.04	0	0.97	26.772		59.6	16.5	24	15.9561	4.41738	6.42528	15.9561	0.176695	0.0215613
			Honey	2.1	17	0.02	0	0.97	2.037		59.6	16.5	24	1.21405	0.336105	0.48888	1.21405	0.0134442	0.00164054
			Cocoa beans	0	69	0.73	6.24	18.681	0		59.6	16.5	24	0	0	0	0	0	0
			Pepper	0.11	1	0.03	0.01	12.124	1.33364		59.6	16.5	24	0.794849	0.220051	0.320074	0.794849	0.00880202	0.00107407
			Pimento	0.17	1	0.06	0.08	12.124	2.06108		59.6	16.5	24	1.2284	0.340078	0.494659	1.2284	0.0136031	0.00165993
			Cloves	0	0	0	0	12.124	0		59.6	16.5	24	0	0	0	0	0	0
			Spices, other	0.2	2	0.05	0.05	12.124	2.4248		59.6	16.5	24	1.44518	0.400092	0.581952	1.44518	0.0160037	0.00195286
			Infant food	0	0	0	0	2.781	0		24.6	56.4	19	0	0	0	0	0	0
			Miscellaneous	0	0	0	0	6.84227	0		59.6	16.5	24	0	0	0	0	0	0
Cyprus	Grain products (non-rice)		Wheat	120.52	958	27.36	8.83	1.4	168.728	192.097	57.9	1.8	40.3	97.6935	3.0371	67.9974	97.6935	0.121484	0.228179	112.454	0.139933	0.255539	1199000	1.11729e+09	3.20199e+07	2.12799e+06
			Barley	8.43	77	2.54	0.41	1.313	11.0686		54.569	1.91155	43.5195	6.04001	0.211582	4.81699	6.04001	0.00846328	0.0161644
			Maize	11.18	110	2.83	1.08	0.988	11.0458		71.9	2.05597	26.1	7.94196	0.2271	2.88296	7.94196	0.00908398	0.00967438
			Millet	0	0	0	0	1.313	0		61.8	1.8	36.4	0	0	0	0	0	0
			Rye	0.02	0	0.01	0	1.4	0.028		73.3007	1.65211	25.0472	0.0205242	0.000462592	0.00701322	0.0205242	1.85037e-05	2.35343e-05
			Oats	0.32	4	0.15	0.06	1.575	0.504		61.8	1.8	36.4	0.311472	0.009072	0.183456	0.311472	0.00036288	0.000615624
			Sorghum	0	0	0	0	1.313	0		61.8	1.8	36.4	0	0	0	0	0	0
			Cereals, other	0.55	5	0.14	0.02	1.313	0.72215		61.8	1.8	36.4	0.446289	0.0129987	0.262863	0.446289	0.000519948	0.000882089
	Rice		Rice (milled equivalent)	5.08	52	0.99	0.1	3.839	19.5021	19.5021	22.2	71.8	6	4.32947	14.0025	1.17013	4.32947	0.560101	0.0039266	4.32947	0.560101	0.0039266
	Fruit		Oranges, mandarines	21.98	19	0.34	0.1	0.317	6.96766	36.8524	56.9055	1.22138	41.8731	3.96498	0.0851015	2.91758	3.96498	0.00340406	0.00979053	25.0344	0.0322401	0.0369531
			Lemons, limes	4.7	2	0.06	0.03	0.317	1.4899		56.3759	0	43.6241	0.839945	0	0.649955	0.839945	0	0.00218106
			Grapefruit	3.59	2	0.04	0.01	0.317	1.13803		68.8513	2.47131	28.6774	0.783548	0.0281242	0.326358	0.783548	0.00112497	0.00109516
			Citrus, other	0.8	2	0.03	0.01	0.317	0.2536		68.8513	2.47131	28.6774	0.174607	0.00626723	0.0727259	0.174607	0.000250689	0.000244047
			Bananas	7.77	13	0.21	0.11	0.678	5.26806		79.4125	3.10136	17.4861	4.1835	0.163381	0.92118	4.1835	0.00653525	0.00309121
			Plantains	0.78	2	0.02	0.01	0.6632	0.517296		68.8513	2.47131	28.6774	0.356165	0.012784	0.148347	0.356165	0.000511359	0.000497809
			Apples	9.57	9	0.03	0.03	0.357	3.41649		72.4477	2.06109	25.4912	2.47517	0.0704171	0.870903	2.47517	0.00281668	0.00292249
			Pineapples	1.44	1	0.01	0.01	0.6632	0.955008		68.8513	2.47131	28.6774	0.657535	0.0236012	0.273872	0.657535	0.000944047	0.000919032
			Dates	0.13	2	0.03	0	0.6632	0.086216		68.8513	2.47131	28.6774	0.0593608	0.00213066	0.0247245	0.0593608	8.52265e-05	8.29682e-05
			Grapes (excluding wine)	1.87	4	0.04	0.01	1.214	2.27018		68.8513	2.47131	28.6774	1.56305	0.0561031	0.651029	1.56305	0.00224412	0.00218466
			Fruits, other	19.32	28	0.36	0.45	0.75	14.49		68.8513	2.47131	28.6774	9.97655	0.358092	4.15536	9.97655	0.0143237	0.0139442
	Vegetables		Cassava	0	0	0	0	0.987	0	76.9232	83.6105	0.362596	16.0269	0	0	0	0	0	0	46.7358	0.0969369	0.0931679
			Potatoes	21.24	44	0.72	0.07	0.37	7.8588		59.711	1.6649	38.6241	4.69257	0.130841	3.03539	4.69257	0.00523365	0.0101859
			Sweet potatoes	0.07	0	0	0	0.365	0.02555		65.672	2.57696	31.751	0.0167792	0.000658414	0.00811239	0.0167792	2.63366e-05	2.72228e-05
			Yams	0	0	0	0	0.365	0		65.672	2.57696	31.751	0	0	0	0	0	0
			Roots, other	0.86	2	0.03	0	0.365	0.3139		65.672	2.57696	31.751	0.206144	0.00808909	0.0996665	0.206144	0.000323564	0.000334451
			Tomatoes	20.45	11	0.54	0.12	1.427	29.1822		53.5199	4.20609	42.274	15.6183	1.22743	12.3365	15.6183	0.0490971	0.0413975
			Onions	3.64	4	0.14	0.02	0.395	1.4378		71.3251	1.22109	27.4538	1.02551	0.0175569	0.394731	1.02551	0.000702274	0.0013246
			Vegetables, other	60.5	56	2.41	0.38	0.455	27.5275		65.672	2.57696	31.751	18.0779	0.709374	8.74026	18.0779	0.0283749	0.0293297
			Aquatic plants	0	0	0	0	0	0		65.672	2.57696	31.751	0	0	0	0	0	0
			Beans	1.18	11	0.71	0.05	1.61	1.8998		75.1226	5.04344	19.834	1.42718	0.0958153	0.376806	1.42718	0.00383261	0.00126445
			Peas	0.09	1	0.06	0	0.896	0.08064		66.4257	5.15877	28.4155	0.0535657	0.00416003	0.0229143	0.0535657	0.000166401	7.68935e-05
			Pulses, other	1.86	18	1.2	0.1	1.61	2.9946		65.672	2.57696	31.751	1.96661	0.0771697	0.950816	1.96661	0.00308679	0.00319066
			Nuts	2.88	25	0.75	2.25	0.278	0.80064		62.5618	3.79852	33.6397	0.500895	0.0304124	0.269333	0.500895	0.0012165	0.0009038
			Soybeans	0.07	0	0.01	0	1.8925	0.132475		63.3478	1.20151	35.4507	0.08392	0.0015917	0.0469633	0.08392	6.36678e-05	0.000157595
			Groundnuts (shelled equivalents)	1.87	21	0.91	1.74	2.497	4.66939		65.672	2.57696	31.751	3.06648	0.120328	1.48258	3.06648	0.00481314	0.0049751
	Meat	Ruminant	Bovine meat	6.81	35	2.89	2.54	42.8	291.468	412.322	10.5	73	16.5	30.6041	212.772	48.0922	30.6041	8.51087	0.161383	55.1376	11.218	0.257499
			Mutton and goat meat	4.95	31	1.94	2.5	24.415	120.854		20.3	56	23.7	24.5334	67.6784	28.6425	24.5334	2.70714	0.0961156
		Non-ruminant	Pig meat	38.77	167	9.45	13.99	7.282	282.323	506.097	47.5051	28.439	24.0559	134.118	80.29	67.9153	134.118	3.2116	0.227904	251.544	4.17456	0.503992
			Poultry meat	25.17	91	9.64	5.56	6.092	153.336		53.86	5.83151	40.3085	82.5866	8.94179	61.8073	82.5866	0.357672	0.207407
			Meat, other	1.04	4	0.5	0.2	6.687	6.95448		49.4604	21.4829	29.0567	3.43972	1.49402	2.02074	3.43972	0.0597609	0.00678101
			Offals, edible	2.36	7	1.11	0.25	26.9	63.484		49.4604	21.4829	29.0567	31.3995	13.6382	18.4463	31.3995	0.545528	0.0619005
	Seafood		Freshwater fish	4.86	7	1.16	0.27	4.005	19.4643	113.214	49.4604	21.4829	29.0567	9.62713	4.18149	5.65568	9.62713	0.16726	0.0189788	109.032	0.428617	0.043392
			Demersal fish	5.17	11	1.39	0.53	4.005	20.7058		78.6427	5.32556	16.0317	16.2836	1.1027	3.3195	16.2836	0.0441081	0.0111393
			Pelagic fish	3.97	10	1.2	0.54	4.005	15.8999		91.6865	7.21239	1.10113	14.578	1.14676	0.175078	14.578	0.0458703	0.000587511
			Marine fish, other	0.73	2	0.23	0.05	4.005	2.92365		89.095	4.66193	6.24304	2.60483	0.136299	0.182525	2.60483	0.00545194	0.000612499
			Crustaceans	2.43	3	0.61	0.03	7.3405	17.8374		89.095	4.66193	6.24304	15.8922	0.831568	1.1136	15.8922	0.0332627	0.0037369
			Cephalopods	4.51	10	1.87	0.15	7.3405	33.1057		89.095	4.66193	6.24304	29.4955	1.54336	2.0668	29.4955	0.0617345	0.00693557
			Molluscs, other	3.08	2	0.34	0.04	7.3405	22.6087		90.3737	7.81574	1.81055	20.4324	1.76704	0.409342	20.4324	0.0706816	0.00137363
			Aquatic animals, others	0.02	0	0	0	6.6476	0.132952		89.095	4.66193	6.24304	0.118454	0.00619813	0.00830025	0.118454	0.000247925	2.78532e-05
	Dairy		Cream	0	0	0	0	2.781	0	349.881	24.1	56.7	19.2	0	0	0	0	0	0	78.1051	8.19777	0.224268
			Butter, ghee	1.63	32	0.04	3.62	2.781	4.53303		24.1	56.7	19.2	1.09246	2.57023	0.870342	1.09246	0.102809	0.00292061
			Milk (excluding butter) *includes cheese	95.93	216	10.82	13.43	3.6	345.348		22.3	58.6	19.1	77.0126	202.374	65.9615	77.0126	8.09496	0.221347
	Eggs		Eggs	7.93	31	2.37	2.25	4.507	35.7405	35.7405	41.5	6.5	52	14.8323	2.32313	18.5851	14.8323	0.0929253	0.062366	14.8323	0.0929253	0.062366
	Oils		Oilcrops, other	0	0	0	0	1.313	0	84.9916	61.4	13	25.6	0	0	0	0	0	0	57.0213	0.363701	0.0632744
			Soybean oil	3.19	77	0	8.74	6.117	19.5132		61.4	13	25.6	11.9811	2.53672	4.99539	11.9811	0.101469	0.016763
			Groundnut oil	0.02	0	0	0.05	5.752	0.11504		61.4	13	25.6	0.0706346	0.0149552	0.0294502	0.0706346	0.000598208	9.88263e-05
			Sunflowerseed oil	8.01	194	0	21.94	3.607	28.8921		61.4	13	25.6	17.7397	3.75597	7.39637	17.7397	0.150239	0.02482
			Rape and mustard oil	0.71	17	0	1.95	3.828	2.71788		65.1	3.3	31.6	1.76934	0.08969	0.85885	1.76934	0.0035876	0.00288205
			Cottonseed oil	0	0	0	0	5.752	0		61.4	13	25.6	0	0	0	0	0	0
			Palmkernel oil	0	0	0	0	5.752	0		56.142	28.9894	14.8685	0	0	0	0	0	0
			Sesame seed oil	0.03	1	0	0.09	5.752	0.17256		61.4	13	25.6	0.105952	0.0224328	0.0441754	0.105952	0.000897312	0.000148239
			Palm oil	0	0	0	0	7.605	0		61.4923	12.9177	25.59	0	0	0	0	0	0
			Coconut oil	0	0	0	0	5.752	0		61.4	13	25.6	0	0	0	0	0	0
			Olive Oil	2.13	51	0	5.82	5.944	12.6607		89.1721	3.20831	7.61958	11.2898	0.406195	0.964694	11.2898	0.0162478	0.00323723
			Rice bran oil	0	0	0	0	5.752	0		61.4	13	25.6	0	0	0	0	0	0
			Maize germ oil	0.48	12	0	1.31	5.752	2.76096		61.4	13	25.6	1.69523	0.358925	0.706806	1.69523	0.014357	0.00237183
			Oilcrops oil, other	1.58	29	0.03	3.27	5.752	9.08816		61.4	13	25.6	5.58013	1.18146	2.32657	5.58013	0.0472584	0.00780728
			Fats, animals, raw	0.38	8	0.03	0.88	6.733	2.55854		61.4	13	25.6	1.57094	0.33261	0.654986	1.57094	0.0133044	0.00219794
			Fish, body oil	0	0	0	0	6.733	0		61.4	13	25.6	0	0	0	0	0	0
			Fish, liver oil	0	0	0	0	6.733	0		61.4	13	25.6	0	0	0	0	0	0
			Sunflower seed	0.15	1	0.05	0.11	1.313	0.19695		61.4	13	25.6	0.120927	0.0256035	0.0504192	0.120927	0.00102414	0.000169192
			Rape and mustardseed	0	2	0	0	1.313	0		65.1	3.3	31.6	0	0	0	0	0	0
			Sesame seed	1.34	22	0.69	1.97	1.313	1.75942		61.4923	12.9177	25.59	1.08191	0.227277	0.450235	1.08191	0.00909107	0.00151086
			Palm kernels	0	0	0	0	1.313	0		56.142	28.9894	14.8685	0	0	0	0	0	0
			Olives (including preserved)	3.34	9	0.09	0.96	1.313	4.38542		89.1721	3.20831	7.61958	3.91057	0.140698	0.334151	3.91057	0.00562791	0.00112131
			Coconuts (including copra)	0.13	2	0.02	0.2	1.313	0.17069		61.4923	12.9177	25.59	0.104961	0	0.0436795	0.104961	0	0.000146576
	Beverages		Coffee	2.9	6	0.41	0	16.477	47.7833	120.549	53.6	0	46.4	25.6118	0	22.1715	25.6118	0	0.0744008	88.9322	0.0459308	0.102894
			Wine	15.6	29	0	0	1.585	24.726		79.6583	3.35563	17.7687	19.6963	0.829713	4.3935	19.6963	0.0331885	0.0147433
			Beer	32.18	44	0.35	0	1.109	35.6876		95	0	5	33.9032	0	1.78438	33.9032	0	0.00598786
			Beverages, fermented	1.01	1	0	0	1.347	1.36047		82	3	15	1.11559	0.0408141	0.204071	1.11559	0.00163256	0.0006848
			Beverages, alcoholic	5.19	42	0	0	1.347	6.99093		82	3	15	5.73256	0.209728	1.04864	5.73256	0.00838912	0.00351892
			Tea (including mate)	0.33	0	0.09	0	12.124	4.00092		71.8	1.7	26.5	2.87266	0.0680156	1.06024	2.87266	0.00272063	0.00355787
	Other		Sugar cane	0	0	0	0	2.672	0	160.436	74.1	1.1	24.8	0	0	0	0	0	0	88.6977	1.35481	0.127536
			Sugar (non-centrifugal)	0.01	0	0	0	0.97	0.0097		59.6	16.5	24	0.0057812	0.0016005	0.002328	0.0057812	6.402e-05	7.81208e-06
			Sugar beet	0	0	0	0	1.536	0		59.6	16.5	24	0	0	0	0	0	0
			Sugar (raw equivalent)	20.69	199	0	0	0.97	20.0693		30.4914	47.2261	22.2824	6.11942	9.47796	4.47193	6.11942	0.379118	0.0150065
			Sweeteners, other	38.09	46	0	0	0.97	36.9473		59.6	16.5	24	22.0206	6.0963	8.86735	22.0206	0.243852	0.0297562
			Honey	0.64	5	0.01	0	0.97	0.6208		59.6	16.5	24	0.369997	0.102432	0.148992	0.369997	0.00409728	0.000499973
			Cocoa beans	0.01	45	0.53	4.03	18.681	0.18681		59.6	16.5	24	0.111339	0.0308236	0.0448344	0.111339	0.00123295	0.000150451
			Pepper	0.09	1	0.03	0.01	12.124	1.09116		59.6	16.5	24	0.650331	0.180041	0.261878	0.650331	0.00720166	0.000878787
			Pimento	0.03	0	0.01	0.02	12.124	0.36372		59.6	16.5	24	0.216777	0.0600138	0.0872928	0.216777	0.00240055	0.000292929
			Cloves	0	0	0	0	12.124	0		59.6	16.5	24	0	0	0	0	0	0
			Spices, other	0.3	3	0.09	0.1	12.124	3.6372		59.6	16.5	24	2.16777	0.600138	0.872928	2.16777	0.0240055	0.00292929
			Infant food	1.11	11	0.46	0.09	2.781	3.08691		24.6	56.4	19	0.75938	1.74102	0.586513	0.75938	0.0696407	0.00196816
			Miscellaneous	13.8	16	0.45	0.19	6.84227	94.4234		59.6	16.5	24	56.2763	15.5799	22.6616	56.2763	0.623194	0.0760457
Czechia	Grain products (non-rice)		Wheat	84.36	647	18.44	4.8	1.4	118.104	133.934	57.9	1.8	40.3	68.3822	2.12587	47.5959	68.3822	0.0850349	0.159718	79.3828	0.09581	0.175021	10689000	1.03905e+10	3.56485e+08	1.93784e+07
			Barley	0.37	2	0.04	0.01	1.313	0.48581		54.569	1.91155	43.5195	0.265101	0.00928652	0.211422	0.265101	0.000371461	0.00070947
			Maize	0	0	0.01	0	0.988	0		71.9	2.05597	26.1	0	0	0	0	0	0
			Millet	0	0	0	0	1.313	0		61.8	1.8	36.4	0	0	0	0	0	0
			Rye	7.78	55	1.45	0.29	1.4	10.892		73.3007	1.65211	25.0472	7.98391	0.179948	2.72814	7.98391	0.00719793	0.00915484
			Oats	2.06	10	0.41	0.16	1.575	3.2445		61.8	1.8	36.4	2.0051	0.058401	1.181	2.0051	0.00233604	0.00396308
			Sorghum	0	0	0	0	1.313	0		61.8	1.8	36.4	0	0	0	0	0	0
			Cereals, other	0.92	8	0.21	0.02	1.313	1.20796		61.8	1.8	36.4	0.746519	0.0217433	0.439697	0.746519	0.000869731	0.00147549
	Rice		Rice (milled equivalent)	6.62	43	0.8	0.09	3.839	25.4142	25.4142	22.2	71.8	6	5.64195	18.2474	1.52485	5.64195	0.729895	0.00511695	5.64195	0.729895	0.00511695
	Fruit		Oranges, mandarines	10.79	13	0.22	0.03	0.317	3.42043	37.2529	56.9055	1.22138	41.8731	1.94641	0.0417764	1.43224	1.94641	0.00167106	0.00480618	26.0986	0.0353375	0.034466
			Lemons, limes	3.3	1	0.05	0.02	0.317	1.0461		56.3759	0	43.6241	0.589749	0	0.456351	0.589749	0	0.00153138
			Grapefruit	1.08	1	0.01	0	0.317	0.34236		68.8513	2.47131	28.6774	0.235719	0.00846076	0.09818	0.235719	0.000338431	0.000329463
			Citrus, other	0.37	1	0.01	0	0.317	0.11729		68.8513	2.47131	28.6774	0.0807557	0.0028986	0.0336357	0.0807557	0.000115944	0.000112872
			Bananas	11.59	19	0.22	0.1	0.678	7.85802		79.4125	3.10136	17.4861	6.24025	0.243705	1.37406	6.24025	0.0097482	0.00461095
			Plantains	0.22	0	0	0	0.6632	0.145904		68.8513	2.47131	28.6774	0.100457	0.00360573	0.0418415	0.100457	0.000144229	0.000140408
			Apples	12.36	15	0.03	0.09	0.357	4.41252		72.4477	2.06109	25.4912	3.19677	0.0909462	1.1248	3.19677	0.00363785	0.00377451
			Pineapples	1.75	2	0.01	0.01	0.6632	1.1606		68.8513	2.47131	28.6774	0.799088	0.028682	0.33283	0.799088	0.00114728	0.00111688
			Dates	0.14	1	0.01	0	0.6632	0.092848		68.8513	2.47131	28.6774	0.063927	0.00229456	0.0266264	0.063927	9.17823e-05	8.93504e-05
			Grapes (excluding wine)	7.38	12	0.11	0.07	1.214	8.95932		68.8513	2.47131	28.6774	6.16861	0.221412	2.5693	6.16861	0.00885649	0.00862182
			Fruits, other	12.93	23	0.31	0.29	0.75	9.6975		68.8513	2.47131	28.6774	6.67685	0.239655	2.78099	6.67685	0.0095862	0.00933219
	Vegetables		Cassava	0	0	0	0	0.987	0	74.1019	83.6105	0.362596	16.0269	0	0	0	0	0	0	45.528	0.0771701	0.0894118
			Potatoes	64	124	2.91	0.17	0.37	23.68		59.711	1.6649	38.6241	14.1396	0.394249	9.14619	14.1396	0.01577	0.0306919
			Sweet potatoes	0.04	0	0	0	0.365	0.0146		65.672	2.57696	31.751	0.00958811	0.000376237	0.00463565	0.00958811	1.50495e-05	1.55559e-05
			Yams	0	0	0	0	0.365	0		65.672	2.57696	31.751	0	0	0	0	0	0
			Roots, other	0	0	0	0	0.365	0		65.672	2.57696	31.751	0	0	0	0	0	0
			Tomatoes	11.15	8	0.36	0.09	1.427	15.9111		53.5199	4.20609	42.274	8.51559	0.669232	6.72623	8.51559	0.0267693	0.0225712
			Onions	9.04	8	0.27	0.05	0.395	3.5708		71.3251	1.22109	27.4538	2.54688	0.0436027	0.980321	2.54688	0.00174411	0.00328967
			Vegetables, other	56.48	43	1.88	0.34	0.455	25.6984		65.672	2.57696	31.751	16.8767	0.662238	8.1595	16.8767	0.0264895	0.0273809
			Aquatic plants	0	0	0	0	0	0		65.672	2.57696	31.751	0	0	0	0	0	0
			Beans	0.17	2	0.11	0.01	1.61	0.2737		75.1226	5.04344	19.834	0.20561	0.0138039	0.0542857	0.20561	0.000552156	0.000182167
			Peas	1.17	11	0.72	0.06	0.896	1.04832		66.4257	5.15877	28.4155	0.696354	0.0540804	0.297886	0.696354	0.00216322	0.000999616
			Pulses, other	0.64	6	0.42	0.03	1.61	1.0304		65.672	2.57696	31.751	0.676684	0.026553	0.327163	0.676684	0.00106212	0.00109786
			Nuts	0.81	13	0.35	1.16	0.278	0.22518		62.5618	3.79852	33.6397	0.140877	0.0085535	0.0757498	0.140877	0.00034214	0.000254194
			Soybeans	0.45	4	0.44	0.21	1.8925	0.851625		63.3478	1.20151	35.4507	0.539486	0.0102323	0.301907	0.539486	0.000409293	0.00101311
			Groundnuts (shelled equivalents)	0.72	11	0.5	0.92	2.497	1.79784		65.672	2.57696	31.751	1.18068	0.0463297	0.570833	1.18068	0.00185319	0.00191555
	Meat	Ruminant	Bovine meat	10.14	30	3.61	1.56	42.8	433.992	441.805	10.5	73	16.5	45.5692	316.814	71.6087	45.5692	12.6726	0.240298	47.1552	12.8476	0.246511
			Mutton and goat meat	0.32	2	0.12	0.19	24.415	7.8128		20.3	56	23.7	1.586	4.37517	1.85163	1.586	0.175007	0.00621354
		Non-ruminant	Pig meat	46.55	205	11.98	17.05	7.282	338.977	573.257	47.5051	28.439	24.0559	161.031	96.4019	81.5439	161.031	3.85607	0.273637	282.881	5.01915	0.553345
			Poultry meat	22.29	83	7.61	5.58	6.092	135.791		53.86	5.83151	40.3085	73.1368	7.91865	54.7352	73.1368	0.316746	0.183675
			Meat, other	4.39	16	2.4	0.58	6.687	29.3559		49.4604	21.4829	29.0567	14.5196	6.3065	8.52986	14.5196	0.25226	0.0286237
			Offals, edible	2.57	8	1.28	0.25	26.9	69.133		49.4604	21.4829	29.0567	34.1935	14.8518	20.0878	34.1935	0.594071	0.0674086
	Seafood		Freshwater fish	2.49	5	0.78	0.23	4.005	9.97245	29.0683	49.4604	21.4829	29.0567	4.93242	2.14237	2.89766	4.93242	0.0856948	0.0097237	30.0819	0.155643	0.0170061
			Demersal fish	2.54	4	0.53	0.18	4.005	10.1727		78.6427	5.32556	16.0317	8.00009	0.541753	1.63086	8.00009	0.0216701	0.00547267
			Pelagic fish	2.92	8	1.02	0.39	4.005	11.6946		91.6865	7.21239	1.10113	10.7224	0.84346	0.128773	10.7224	0.0337384	0.000432124
			Marine fish, other	0.81	2	0.24	0.05	4.005	3.24405		89.095	4.66193	6.24304	2.89029	0.151235	0.202527	2.89029	0.00604942	0.000679622
			Crustaceans	0.37	0	0.09	0	7.3405	2.71598		89.095	4.66193	6.24304	2.41981	0.126617	0.16956	2.41981	0.00506469	0.000568993
			Cephalopods	0.04	0	0.02	0	7.3405	0.29362		89.095	4.66193	6.24304	0.261601	0.0136884	0.0183308	0.261601	0.000547535	6.15128e-05
			Molluscs, other	0.12	0	0.01	0	7.3405	0.88086		90.3737	7.81574	1.81055	0.796066	0.0688457	0.0159484	0.796066	0.00275383	5.3518e-05
			Aquatic animals, others	0.01	0	0	0	6.6476	0.066476		89.095	4.66193	6.24304	0.0592268	0.00309907	0.00415012	0.0592268	0.000123963	1.39266e-05
	Dairy		Cream	4.74	25	0.35	2.51	2.781	13.1819	554.794	24.1	56.7	19.2	3.17685	7.47416	2.53093	3.17685	0.298966	0.00849306	124.146	12.9863	0.355669
			Butter, ghee	3.79	74	0.09	8.41	2.781	10.54		24.1	56.7	19.2	2.54014	5.97617	2.02368	2.54014	0.239047	0.00679087
			Milk (excluding butter) *includes cheese	147.52	286	19.98	17.69	3.6	531.072		22.3	58.6	19.1	118.429	311.208	101.435	118.429	12.4483	0.340385
	Eggs		Eggs	8.8	34	2.61	2.39	4.507	39.6616	39.6616	41.5	6.5	52	16.4596	2.578	20.624	16.4596	0.10312	0.0692082	16.4596	0.10312	0.0692082
	Oils		Oilcrops, other	0.11	2	0.06	0.14	1.313	0.14443	112.813	61.4	13	25.6	0.08868	0.0187759	0.0369741	0.08868	0.000751036	0.000124074	71.9968	0.392121	0.103957
			Soybean oil	1.36	34	0	3.87	6.117	8.31912		61.4	13	25.6	5.10794	1.08149	2.12969	5.10794	0.0432594	0.00714663
			Groundnut oil	0.13	3	0	0.36	5.752	0.74776		61.4	13	25.6	0.459125	0.0972088	0.191427	0.459125	0.00388835	0.000642371
			Sunflowerseed oil	3.31	83	0	9.38	3.607	11.9392		61.4	13	25.6	7.33065	1.55209	3.05643	7.33065	0.0620837	0.0102565
			Rape and mustard oil	12.03	373	0.07	42.17	3.828	46.0508		65.1	3.3	31.6	29.9791	1.51968	14.5521	29.9791	0.0607871	0.0488324
			Cottonseed oil	0	0	0	0	5.752	0		61.4	13	25.6	0	0	0	0	0	0
			Palmkernel oil	0	0	0	0	5.752	0		56.142	28.9894	14.8685	0	0	0	0	0	0
			Sesame seed oil	0	0	0	0	5.752	0		61.4	13	25.6	0	0	0	0	0	0
			Palm oil	0	26	0.02	2.9	7.605	0		61.4923	12.9177	25.59	0	0	0	0	0	0
			Coconut oil	0	0	0	0	5.752	0		61.4	13	25.6	0	0	0	0	0	0
			Olive Oil	0.46	11	0	1.25	5.944	2.73424		89.1721	3.20831	7.61958	2.43818	0.0877229	0.208338	2.43818	0.00350891	0.00069912
			Rice bran oil	0	0	0	0	5.752	0		61.4	13	25.6	0	0	0	0	0	0
			Maize germ oil	0.01	0	0	0.02	5.752	0.05752		61.4	13	25.6	0.0353173	0.0074776	0.0147251	0.0353173	0.000299104	4.94132e-05
			Oilcrops oil, other	0.08	2	0	0.21	5.752	0.46016		61.4	13	25.6	0.282538	0.0598208	0.117801	0.282538	0.00239283	0.000395305
			Fats, animals, raw	6.11	141	0.11	15.6	6.733	41.1386		61.4	13	25.6	25.2591	5.34802	10.5315	25.2591	0.213921	0.0353406
			Fish, body oil	0	0	0	0	6.733	0		61.4	13	25.6	0	0	0	0	0	0
			Fish, liver oil	0	0	0	0	6.733	0		61.4	13	25.6	0	0	0	0	0	0
			Sunflower seed	0	0	0	0	1.313	0		61.4	13	25.6	0	0	0	0	0	0
			Rape and mustardseed	0	0	0	0	1.313	0		65.1	3.3	31.6	0	0	0	0	0	0
			Sesame seed	0	0	0	0	1.313	0		61.4923	12.9177	25.59	0	0	0	0	0	0
			Palm kernels	0	0	0	0	1.313	0		56.142	28.9894	14.8685	0	0	0	0	0	0
			Olives (including preserved)	0.73	2	0.02	0.22	1.313	0.95849		89.1721	3.20831	7.61958	0.854706	0.0307513	0.0730329	0.854706	0.00123005	0.000245077
			Coconuts (including copra)	0.2	3	0.03	0.29	1.313	0.2626		61.4923	12.9177	25.59	0.161479	0	0.0671993	0.161479	0	0.000225501
	Beverages		Coffee	2.24	3	0.39	0	16.477	36.9085	243.071	53.6	0	46.4	19.7829	0	17.1255	19.7829	0	0.0574682	209.719	0.0495786	0.108174
			Wine	9.9	19	0	0	1.585	15.6915		79.6583	3.35563	17.7687	12.4996	0.526549	2.78818	12.4996	0.0210619	0.00935632
			Beer	149.28	200	2.04	0	1.109	165.552		95	0	5	157.274	0	8.27758	157.274	0	0.0277771
			Beverages, fermented	1.06	1	0	0	1.347	1.42782		82	3	15	1.17081	0.0428346	0.214173	1.17081	0.00171338	0.000718701
			Beverages, alcoholic	15.46	125	0	0	1.347	20.8246		82	3	15	17.0762	0.624739	3.12369	17.0762	0.0249895	0.0104822
			Tea (including mate)	0.22	0	0.06	0	12.124	2.66728		71.8	1.7	26.5	1.91511	0.0453438	0.706829	1.91511	0.00181375	0.00237191
	Other		Sugar cane	0	0	0	0	2.672	0	70.8207	74.1	1.1	24.8	0	0	0	0	0	0	32.9838	0.858939	0.0550431
			Sugar (non-centrifugal)	0	0	0	0	0.97	0		59.6	16.5	24	0	0	0	0	0	0
			Sugar beet	0	0	0	0	1.536	0		59.6	16.5	24	0	0	0	0	0	0
			Sugar (raw equivalent)	30.57	298	0	0	0.97	29.6529		30.4914	47.2261	22.2824	9.04159	14.0039	6.60739	9.04159	0.560157	0.0221724
			Sweeteners, other	12.91	33	0.02	0	0.97	12.5227		59.6	16.5	24	7.46353	2.06625	3.00545	7.46353	0.0826498	0.0100854
			Honey	0.84	7	0.01	0	0.97	0.8148		59.6	16.5	24	0.485621	0.134442	0.195552	0.485621	0.00537768	0.000656215
			Cocoa beans	0	31	0.55	2.73	18.681	0		59.6	16.5	24	0	0	0	0	0	0
			Pepper	0.08	1	0.02	0.01	12.124	0.96992		59.6	16.5	24	0.578072	0.160037	0.232781	0.578072	0.00640147	0.000781144
			Pimento	0.4	4	0.13	0.19	12.124	4.8496		59.6	16.5	24	2.89036	0.800184	1.1639	2.89036	0.0320074	0.00390572
			Cloves	0	0	0	0	12.124	0		59.6	16.5	24	0	0	0	0	0	0
			Spices, other	0.18	2	0.04	0.03	12.124	2.18232		59.6	16.5	24	1.30066	0.360083	0.523757	1.30066	0.0144033	0.00175757
			Infant food	0.61	6	0.26	0.05	2.781	1.69641		24.6	56.4	19	0.417317	0.956775	0.322318	0.417317	0.038271	0.0010816
			Miscellaneous	2.65	3	0.09	0.04	6.84227	18.132		59.6	16.5	24	10.8067	2.99178	4.35169	10.8067	0.119671	0.014603
Denmark	Grain products (non-rice)		Wheat	85.2	598	19	2.44	1.4	119.28	149.051	57.9	1.8	40.3	69.0631	2.14704	48.0698	69.0631	0.0858816	0.161308	90.1011	0.106877	0.188862	5772000	6.56484e+09	3.34725e+08	1.41071e+07
			Barley	0.01	0	0	0	1.313	0.01313		54.569	1.91155	43.5195	0.0071649	0.000250987	0.00571411	0.0071649	1.00395e-05	1.91749e-05
			Maize	6.02	42	0.97	0.14	0.988	5.94776		71.9	2.05597	26.1	4.27644	0.122284	1.55237	4.27644	0.00489138	0.00520928
			Millet	0	0	0	0	1.313	0		61.8	1.8	36.4	0	0	0	0	0	0
			Rye	12.67	100	2.54	0.35	1.4	17.738		73.3007	1.65211	25.0472	13.0021	0.293052	4.44287	13.0021	0.0117221	0.014909
			Oats	3.78	24	0.93	0.45	1.575	5.9535		61.8	1.8	36.4	3.67926	0.107163	2.16707	3.67926	0.00428652	0.00727206
			Sorghum	0	0	0	0	1.313	0		61.8	1.8	36.4	0	0	0	0	0	0
			Cereals, other	0.09	1	0.03	0.01	1.313	0.11817		61.8	1.8	36.4	0.0730291	0.00212706	0.0430139	0.0730291	8.50824e-05	0.000144342
	Rice		Rice (milled equivalent)	4.4	43	0.84	0.08	3.839	16.8916	16.8916	22.2	71.8	6	3.74994	12.1282	1.0135	3.74994	0.485127	0.00340099	3.74994	0.485127	0.00340099
	Fruit		Oranges, mandarines	10.05	17	0.28	0.04	0.317	3.18585	41.6177	56.9055	1.22138	41.8731	1.81292	0.0389113	1.33402	1.81292	0.00155645	0.00447656	29.2519	0.0410157	0.0380554
			Lemons, limes	2.62	1	0.03	0.03	0.317	0.83054		56.3759	0	43.6241	0.468225	0	0.362315	0.468225	0	0.00121582
			Grapefruit	0.47	1	0.01	0	0.317	0.14899		68.8513	2.47131	28.6774	0.102582	0.003682	0.0427265	0.102582	0.00014728	0.000143377
			Citrus, other	0.53	1	0.02	0	0.317	0.16801		68.8513	2.47131	28.6774	0.115677	0.00415204	0.0481809	0.115677	0.000166082	0.000161681
			Bananas	14.52	24	0.32	0.04	0.678	9.84456		79.4125	3.10136	17.4861	7.81781	0.305315	1.72143	7.81781	0.0122126	0.00577662
			Plantains	0.02	0	0	0	0.6632	0.013264		68.8513	2.47131	28.6774	0.00913243	0.000327794	0.00380377	0.00913243	1.31118e-05	1.27643e-05
			Apples	3.27	14	0.09	0.05	0.357	1.16739		72.4477	2.06109	25.4912	0.845748	0.024061	0.297581	0.845748	0.00096244	0.000998595
			Pineapples	2.82	5	0.03	0.01	0.6632	1.87022		68.8513	2.47131	28.6774	1.28767	0.046219	0.536332	1.28767	0.00184876	0.00179977
			Dates	0.53	4	0.02	0.01	0.6632	0.351496		68.8513	2.47131	28.6774	0.242009	0.00868654	0.1008	0.242009	0.000347462	0.000338255
			Grapes (excluding wine)	6.53	12	0.11	0.04	1.214	7.92742		68.8513	2.47131	28.6774	5.45813	0.195911	2.27338	5.45813	0.00783643	0.00762879
			Fruits, other	21.48	35	0.4	1.31	0.75	16.11		68.8513	2.47131	28.6774	11.0919	0.398127	4.61993	11.0919	0.0159251	0.0155031
	Vegetables		Cassava	0	0	0	0	0.987	0	86.2189	83.6105	0.362596	16.0269	0	0	0	0	0	0	53.1137	0.0936546	0.103235
			Potatoes	56.92	107	2.14	0.13	0.37	21.0604		59.711	1.6649	38.6241	12.5754	0.350635	8.1344	12.5754	0.0140254	0.0272966
			Sweet potatoes	0	0	0	0	0.365	0		65.672	2.57696	31.751	0	0	0	0	0	0
			Yams	0	0	0	0	0.365	0		65.672	2.57696	31.751	0	0	0	0	0	0
			Roots, other	0	0	0	0	0.365	0		65.672	2.57696	31.751	0	0	0	0	0	0
			Tomatoes	13.84	10	0.48	0.11	1.427	19.7497		53.5199	4.20609	42.274	10.57	0.830688	8.34897	10.57	0.0332275	0.0280167
			Onions	6.74	7	0.22	0.04	0.395	2.6623		71.3251	1.22109	27.4538	1.89889	0.0325091	0.730903	1.89889	0.00130037	0.0024527
			Vegetables, other	83.58	64	2.82	0.62	0.455	38.0289		65.672	2.57696	31.751	24.9743	0.979991	12.0746	24.9743	0.0391996	0.0405187
			Aquatic plants	0	0	0	0	0	0		65.672	2.57696	31.751	0	0	0	0	0	0
			Beans	0.13	1	0.07	0.01	1.61	0.2093		75.1226	5.04344	19.834	0.157232	0.0105559	0.0415126	0.157232	0.000422237	0.000139304
			Peas	0.71	7	0.44	0.03	0.896	0.63616		66.4257	5.15877	28.4155	0.422574	0.032818	0.180768	0.422574	0.00131272	0.000606604
			Pulses, other	0.21	2	0.12	0.02	1.61	0.3381		65.672	2.57696	31.751	0.222037	0.00871271	0.10735	0.222037	0.000348509	0.000360236
			Nuts	2.44	38	1.14	3.46	0.278	0.67832		62.5618	3.79852	33.6397	0.424369	0.0257661	0.228184	0.424369	0.00103064	0.00076572
			Soybeans	0.15	0	0.02	0	1.8925	0.283875		63.3478	1.20151	35.4507	0.179829	0.00341078	0.100636	0.179829	0.000136431	0.000337703
			Groundnuts (shelled equivalents)	1.03	12	0.55	1.04	2.497	2.57191		65.672	2.57696	31.751	1.68903	0.0662772	0.816608	1.68903	0.00265109	0.00274029
	Meat	Ruminant	Bovine meat	23.52	70	8.55	3.66	42.8	1006.66	1027.16	10.5	73	16.5	105.699	734.859	166.098	105.699	29.3944	0.557377	109.862	29.8537	0.573687
			Mutton and goat meat	0.84	5	0.29	0.46	24.415	20.5086		20.3	56	23.7	4.16325	11.4848	4.86054	4.16325	0.459393	0.0163105
		Non-ruminant	Pig meat	26.66	204	8.38	18.69	7.282	194.138	555.204	47.5051	28.439	24.0559	92.2254	55.211	46.7016	92.2254	2.20844	0.156717	278.02	4.28519	0.570652
			Poultry meat	26.9	102	11.92	5.66	6.092	163.875		53.86	5.83151	40.3085	88.2629	9.55638	66.0555	88.2629	0.382255	0.221663
			Meat, other	1.41	7	1.34	0.16	6.687	9.42867		49.4604	21.4829	29.0567	4.66346	2.02555	2.73966	4.66346	0.081022	0.00919349
			Offals, edible	6.98	23	3.44	0.65	26.9	187.762		49.4604	21.4829	29.0567	92.8679	40.3367	54.5574	92.8679	1.61347	0.183079
	Seafood		Freshwater fish	2.16	4	0.64	0.15	4.005	8.6508	125.192	49.4604	21.4829	29.0567	4.27872	1.85844	2.51364	4.27872	0.0743377	0.00843502	114.341	0.368726	0.0345102
			Demersal fish	6.33	20	2.66	0.94	4.005	25.3516		78.6427	5.32556	16.0317	19.9372	1.35012	4.0643	19.9372	0.0540047	0.0136386
			Pelagic fish	9.98	45	5.51	2.26	4.005	39.9699		91.6865	7.21239	1.10113	36.647	2.88278	0.440121	36.647	0.115311	0.00147692
			Marine fish, other	0	0	0	0	4.005	0		89.095	4.66193	6.24304	0	0	0	0	0	0
			Crustaceans	6.61	5	0.98	0.06	7.3405	48.5207		89.095	4.66193	6.24304	43.2295	2.262	3.02917	43.2295	0.0904801	0.010165
			Cephalopods	0.06	0	0.02	0	7.3405	0.44043		89.095	4.66193	6.24304	0.392401	0.0205325	0.0274962	0.392401	0.000821302	9.22692e-05
			Molluscs, other	1.45	1	0.15	0.01	7.3405	10.6437		90.3737	7.81574	1.81055	9.61913	0.831886	0.19271	9.61913	0.0332754	0.000646676
			Aquatic animals, others	0.04	0	0.01	0	6.6476	0.265904		89.095	4.66193	6.24304	0.236907	0.0123963	0.0166005	0.236907	0.000495851	5.57064e-05
	Dairy		Cream	8.51	45	0.63	4.5	2.781	23.6663	910.125	24.1	56.7	19.2	5.70358	13.4188	4.54393	5.70358	0.536752	0.0152481	203.514	21.3098	0.583439
			Butter, ghee	2.6	51	0.06	5.78	2.781	7.2306		24.1	56.7	19.2	1.74257	4.09975	1.38828	1.74257	0.16399	0.00465864
			Milk (excluding butter) *includes cheese	244.23	411	29.81	25.83	3.6	879.228		22.3	58.6	19.1	196.068	515.228	167.933	196.068	20.6091	0.563532
	Eggs		Eggs	0	0	0	0	4.507	0	0	41.5	6.5	52	0	0	0	0	0	0	0	0	0
	Oils		Oilcrops, other	0.02	0	0.01	0.02	1.313	0.02626	79.343	61.4	13	25.6	0.0161236	0.0034138	0.00672256	0.0161236	0.000136552	2.25589e-05	50.6158	0.383553	0.0640352
			Soybean oil	0	51	0.04	5.7	6.117	0		61.4	13	25.6	0	0	0	0	0	0
			Groundnut oil	0	2	0	0.18	5.752	0		61.4	13	25.6	0	0	0	0	0	0
			Sunflowerseed oil	0	20	0.02	2.27	3.607	0		61.4	13	25.6	0	0	0	0	0	0
			Rape and mustard oil	0	0	0	0	3.828	0		65.1	3.3	31.6	0	0	0	0	0	0
			Cottonseed oil	0	0	0	0	5.752	0		61.4	13	25.6	0	0	0	0	0	0
			Palmkernel oil	0	0	0	0	5.752	0		56.142	28.9894	14.8685	0	0	0	0	0	0
			Sesame seed oil	0.16	4	0	0.44	5.752	0.92032		61.4	13	25.6	0.565076	0.119642	0.235602	0.565076	0.00478566	0.00079061
			Palm oil	0	77	0.06	8.62	7.605	0		61.4923	12.9177	25.59	0	0	0	0	0	0
			Coconut oil	0	0	0	0	5.752	0		61.4	13	25.6	0	0	0	0	0	0
			Olive Oil	1	24	0	2.73	5.944	5.944		89.1721	3.20831	7.61958	5.30039	0.190702	0.452908	5.30039	0.00762807	0.00151983
			Rice bran oil	0	0	0	0	5.752	0		61.4	13	25.6	0	0	0	0	0	0
			Maize germ oil	0.09	2	0	0.25	5.752	0.51768		61.4	13	25.6	0.317856	0.0672984	0.132526	0.317856	0.00269194	0.000444718
			Oilcrops oil, other	0.57	12	0	1.41	5.752	3.27864		61.4	13	25.6	2.01308	0.426223	0.839332	2.01308	0.0170489	0.00281655
			Fats, animals, raw	7.56	180	0.07	20.11	6.733	50.9015		61.4	13	25.6	31.2535	6.61719	13.0308	31.2535	0.264688	0.0437274
			Fish, body oil	2.44	60	0	6.68	6.733	16.4285		61.4	13	25.6	10.0871	2.13571	4.2057	10.0871	0.0854283	0.0141131
			Fish, liver oil	0	0	0	0	6.733	0		61.4	13	25.6	0	0	0	0	0	0
			Sunflower seed	0	0	0	0	1.313	0		61.4	13	25.6	0	0	0	0	0	0
			Rape and mustardseed	0	1	0	0	1.313	0		65.1	3.3	31.6	0	0	0	0	0	0
			Sesame seed	0	0	0	0	1.313	0		61.4923	12.9177	25.59	0	0	0	0	0	0
			Palm kernels	0	0	0	0	1.313	0		56.142	28.9894	14.8685	0	0	0	0	0	0
			Olives (including preserved)	0.68	2	0.02	0.2	1.313	0.89284		89.1721	3.20831	7.61958	0.796164	0.0286451	0.0680307	0.796164	0.0011458	0.000228291
			Coconuts (including copra)	0.33	6	0.06	0.58	1.313	0.43329		61.4923	12.9177	25.59	0.26644	0	0.110879	0.26644	0	0.000372077
	Beverages		Coffee	7.03	10	1.2	0	16.477	115.833	243.211	53.6	0	46.4	62.0867	0	53.7467	62.0867	0	0.180358	173.808	0.0688257	0.22822
			Wine	26.35	49	0	0	1.585	41.7647		79.6583	3.35563	17.7687	33.2691	1.40147	7.42107	33.2691	0.0560588	0.0249029
			Beer	63.91	86	0.88	0	1.109	70.8762		95	0	5	67.3324	0	3.54381	67.3324	0	0.011892
			Beverages, fermented	0.31	0	0	0	1.347	0.41757		82	3	15	0.342407	0.0125271	0.0626355	0.342407	0.000501084	0.000210186
			Beverages, alcoholic	3.61	29	0	0	1.347	4.86267		82	3	15	3.98739	0.14588	0.729401	3.98739	0.0058352	0.00244765
			Tea (including mate)	0.78	1	0.13	0	12.124	9.45672		71.8	1.7	26.5	6.78992	0.160764	2.50603	6.78992	0.00643057	0.0084095
	Other		Sugar cane	0	0	0	0	2.672	0	72.4963	74.1	1.1	24.8	0	0	0	0	0	0	30.9819	0.994687	0.0559655
			Sugar (non-centrifugal)	0	0	0	0	0.97	0		59.6	16.5	24	0	0	0	0	0	0
			Sugar beet	0	0	0	0	1.536	0		59.6	16.5	24	0	0	0	0	0	0
			Sugar (raw equivalent)	43.3	419	0	0	0.97	42.001		30.4914	47.2261	22.2824	12.8067	19.8355	9.35884	12.8067	0.793418	0.0314055
			Sweeteners, other	12.29	66	0	0	0.97	11.9213		59.6	16.5	24	7.10509	1.96701	2.86111	7.10509	0.0786806	0.00960105
			Honey	0.65	5	0.01	0	0.97	0.6305		59.6	16.5	24	0.375778	0.104032	0.15132	0.375778	0.0041613	0.000507785
			Cocoa beans	0	51	0.81	4.5	18.681	0		59.6	16.5	24	0	0	0	0	0	0
			Pepper	0.15	1	0.04	0.01	12.124	1.8186		59.6	16.5	24	1.08389	0.300069	0.436464	1.08389	0.0120028	0.00146464
			Pimento	0.12	1	0.04	0.06	12.124	1.45488		59.6	16.5	24	0.867108	0.240055	0.349171	0.867108	0.00960221	0.00117172
			Cloves	0.01	0	0	0	12.124	0.12124		59.6	16.5	24	0.072259	0.0200046	0.0290976	0.072259	0.000800184	9.7643e-05
			Spices, other	1.2	11	0.34	0.39	12.124	14.5488		59.6	16.5	24	8.67108	2.40055	3.49171	8.67108	0.0960221	0.0117172
			Infant food	0	0	0	0	2.781	0		24.6	56.4	19	0	0	0	0	0	0
			Miscellaneous	0	0	0	0	6.84227	0		59.6	16.5	24	0	0	0	0	0	0
Estonia	Grain products (non-rice)		Wheat	61.08	527	17.42	4.32	1.4	85.512	133.34	57.9	1.8	40.3	49.5114	1.53922	34.4613	49.5114	0.0615686	0.115642	82.1749	0.0963062	0.163639	1326000	1.30454e+09	5.46302e+07	2.75986e+06
			Barley	4.86	34	0.89	0.1	1.313	6.38118		54.569	1.91155	43.5195	3.48214	0.12198	2.77706	3.48214	0.00487919	0.00931898
			Maize	12.14	85	1.96	0.28	0.988	11.9943		71.9	2.05597	26.1	8.62392	0.2466	3.13052	8.62392	0.009864	0.0105051
			Millet	0	0	0	0	1.313	0		61.8	1.8	36.4	0	0	0	0	0	0
			Rye	14.63	109	2.88	0.58	1.4	20.482		73.3007	1.65211	25.0472	15.0134	0.338386	5.13017	15.0134	0.0135354	0.0172153
			Oats	3.87	22	0.93	0.37	1.575	6.09525		61.8	1.8	36.4	3.76686	0.109715	2.21867	3.76686	0.00438858	0.0074452
			Sorghum	0	0	0	0	1.313	0		61.8	1.8	36.4	0	0	0	0	0	0
			Cereals, other	2.19	22	0.6	0.07	1.313	2.87547		61.8	1.8	36.4	1.77704	0.0517585	1.04667	1.77704	0.00207034	0.00351232
	Rice		Rice (milled equivalent)	2.33	23	0.43	0.05	3.839	8.94487	8.94487	22.2	71.8	6	1.98576	6.42242	0.536692	1.98576	0.256897	0.00180098	1.98576	0.256897	0.00180098
	Fruit		Oranges, mandarines	14.25	14	0.24	0.04	0.317	4.51725	57.3022	56.9055	1.22138	41.8731	2.57056	0.0551727	1.89151	2.57056	0.00220691	0.00634736	40.1374	0.0555025	0.0529438
			Lemons, limes	1.97	1	0.03	0.01	0.317	0.62449		56.3759	0	43.6241	0.352062	0	0.272428	0.352062	0	0.000914187
			Grapefruit	1.58	1	0.01	0	0.317	0.50086		68.8513	2.47131	28.6774	0.344849	0.0123778	0.143634	0.344849	0.000495111	0.000481992
			Citrus, other	0.17	0	0	0	0.317	0.05389		68.8513	2.47131	28.6774	0.037104	0.00133179	0.0154543	0.037104	5.32715e-05	5.18599e-05
			Bananas	15.42	25	0.3	0.13	0.678	10.4548		79.4125	3.10136	17.4861	8.30239	0.324239	1.82813	8.30239	0.0129696	0.00613467
			Plantains	0	0	0	0	0.6632	0		68.8513	2.47131	28.6774	0	0	0	0	0	0
			Apples	15.38	19	0.04	0.1	0.357	5.49066		72.4477	2.06109	25.4912	3.97786	0.113168	1.39963	3.97786	0.00452671	0.00469676
			Pineapples	1.99	3	0.02	0.01	0.6632	1.31977		68.8513	2.47131	28.6774	0.908677	0.0326155	0.378475	0.908677	0.00130462	0.00127005
			Dates	0.11	0	0	0	0.6632	0.072952		68.8513	2.47131	28.6774	0.0502284	0.00180287	0.0209207	0.0502284	7.21147e-05	7.02039e-05
			Grapes (excluding wine)	13.61	21	0.2	0.13	1.214	16.5225		68.8513	2.47131	28.6774	11.376	0.408323	4.73824	11.376	0.0163329	0.0159001
			Fruits, other	23.66	38	0.51	0.6	0.75	17.745		68.8513	2.47131	28.6774	12.2177	0.438533	5.08881	12.2177	0.0175413	0.0170765
	Vegetables		Cassava	0	0	0	0	0.987	0	92.2198	83.6105	0.362596	16.0269	0	0	0	0	0	0	56.6831	0.103839	0.110539
			Potatoes	64.17	138	2.81	0.18	0.37	23.7429		59.711	1.6649	38.6241	14.1771	0.395296	9.17049	14.1771	0.0158118	0.0307735
			Sweet potatoes	0.05	0	0	0	0.365	0.01825		65.672	2.57696	31.751	0.0119851	0.000470296	0.00579456	0.0119851	1.88118e-05	1.94448e-05
			Yams	0	0	0	0	0.365	0		65.672	2.57696	31.751	0	0	0	0	0	0
			Roots, other	0	0	0	0	0.365	0		65.672	2.57696	31.751	0	0	0	0	0	0
			Tomatoes	15.21	9	0.43	0.11	1.427	21.7047		53.5199	4.20609	42.274	11.6163	0.912917	9.17543	11.6163	0.0365167	0.03079
			Onions	6.93	6	0.21	0.04	0.395	2.73735		71.3251	1.22109	27.4538	1.95242	0.0334256	0.751507	1.95242	0.00133702	0.00252184
			Vegetables, other	83.43	68	2.57	0.49	0.455	37.9607		65.672	2.57696	31.751	24.9295	0.978232	12.0529	24.9295	0.0391293	0.040446
			Aquatic plants	0	0	0	0	0	0		65.672	2.57696	31.751	0	0	0	0	0	0
			Beans	0.05	0	0.03	0	1.61	0.0805		75.1226	5.04344	19.834	0.0604737	0.00405997	0.0159664	0.0604737	0.000162399	5.35784e-05
			Peas	4.98	47	3.07	0.24	0.896	4.46208		66.4257	5.15877	28.4155	2.96397	0.230189	1.26792	2.96397	0.00920754	0.00425478
			Pulses, other	0.01	0	0	0	1.61	0.0161		65.672	2.57696	31.751	0.0105732	0.000414891	0.00511191	0.0105732	1.65956e-05	1.71541e-05
			Nuts	1.85	30	0.78	2.69	0.278	0.5143		62.5618	3.79852	33.6397	0.321756	0.0195358	0.173009	0.321756	0.000781431	0.000580566
			Soybeans	0.15	0	0.02	0	1.8925	0.283875		63.3478	1.20151	35.4507	0.179829	0.00341078	0.100636	0.179829	0.000136431	0.000337703
			Groundnuts (shelled equivalents)	0.28	4	0.2	0.37	2.497	0.69916		65.672	2.57696	31.751	0.459152	0.0180171	0.22199	0.459152	0.000720684	0.000744934
	Meat	Ruminant	Bovine meat	8.64	37	3.47	2.4	42.8	369.792	381.267	10.5	73	16.5	38.8282	269.948	61.0157	38.8282	10.7979	0.204751	41.1576	11.055	0.213877
			Mutton and goat meat	0.47	3	0.17	0.29	24.415	11.475		20.3	56	23.7	2.32944	6.42603	2.71959	2.32944	0.257041	0.00912613
		Non-ruminant	Pig meat	37.76	180	9.19	15.55	7.282	274.968	499.398	47.5051	28.439	24.0559	130.624	78.1984	66.1461	130.624	3.12794	0.221967	247.57	4.21095	0.491794
			Poultry meat	22.17	91	7.62	6.38	6.092	135.06		53.86	5.83151	40.3085	72.7431	7.87602	54.4405	72.7431	0.315041	0.182686
			Meat, other	0.13	1	0.1	0.03	6.687	0.86931		49.4604	21.4829	29.0567	0.429964	0.186753	0.252593	0.429964	0.00747011	0.000847627
			Offals, edible	3.29	10	1.65	0.27	26.9	88.501		49.4604	21.4829	29.0567	43.773	19.0126	25.7155	43.773	0.760503	0.0862935
	Seafood		Freshwater fish	1.36	3	0.43	0.13	4.005	5.4468	65.681	49.4604	21.4829	29.0567	2.69401	1.17013	1.58266	2.69401	0.0468052	0.00531094	58.4381	0.191991	0.0264764
			Demersal fish	7.33	8	1.52	0.18	4.005	29.3566		78.6427	5.32556	16.0317	23.0869	1.56341	4.70637	23.0869	0.0625363	0.0157932
			Pelagic fish	2.29	6	0.88	0.24	4.005	9.17145		91.6865	7.21239	1.10113	8.40898	0.66148	0.10099	8.40898	0.0264592	0.000338892
			Marine fish, other	0	0	0	0	4.005	0		89.095	4.66193	6.24304	0	0	0	0	0	0
			Crustaceans	2.94	4	0.79	0.04	7.3405	21.5811		89.095	4.66193	6.24304	19.2277	1.00609	1.34731	19.2277	0.0402438	0.00452119
			Cephalopods	0.15	0	0.06	0.01	7.3405	1.10107		89.095	4.66193	6.24304	0.981003	0.0513314	0.0687406	0.981003	0.00205325	0.000230673
			Molluscs, other	0.6	0	0.05	0.01	7.3405	4.4043		90.3737	7.81574	1.81055	3.98033	0.344229	0.0797419	3.98033	0.0137691	0.00026759
			Aquatic animals, others	0.01	0	0	0	6.6476	0.066476		89.095	4.66193	6.24304	0.0592268	0.00309907	0.00415012	0.0592268	0.000123963	1.39266e-05
	Dairy		Cream	0.92	5	0.07	0.49	2.781	2.55852	1025.42	24.1	56.7	19.2	0.616603	1.45068	0.491236	0.616603	0.0580272	0.00164844	228.91	24.0258	0.65728
			Butter, ghee	3.87	76	0.1	8.59	2.781	10.7625		24.1	56.7	19.2	2.59376	6.10232	2.06639	2.59376	0.244093	0.00693421
			Milk (excluding butter) *includes cheese	281.14	569	35.66	34.43	3.6	1012.1		22.3	58.6	19.1	225.699	593.093	193.312	225.699	23.7237	0.648698
	Eggs		Eggs	12.68	48	3.67	3.37	4.507	57.1488	57.1488	41.5	6.5	52	23.7167	3.71467	29.7174	23.7167	0.148587	0.0997227	23.7167	0.148587	0.0997227
	Oils		Oilcrops, other	0	0	0	0	1.313	0	51.9497	61.4	13	25.6	0	0	0	0	0	0	33.3247	0.201004	0.045603
			Soybean oil	0.47	12	0	1.3	6.117	2.87499		61.4	13	25.6	1.76524	0.373749	0.735997	1.76524	0.0149499	0.00246979
			Groundnut oil	0	0	0	0.01	5.752	0		61.4	13	25.6	0	0	0	0	0	0
			Sunflowerseed oil	1.22	30	0	3.34	3.607	4.40054		61.4	13	25.6	2.70193	0.57207	1.12654	2.70193	0.0228828	0.00378033
			Rape and mustard oil	3.78	92	0	10.35	3.828	14.4698		65.1	3.3	31.6	9.41987	0.477505	4.57247	9.41987	0.0191002	0.0153439
			Cottonseed oil	0	0	0	0	5.752	0		61.4	13	25.6	0	0	0	0	0	0
			Palmkernel oil	0	0	0	0	5.752	0		56.142	28.9894	14.8685	0	0	0	0	0	0
			Sesame seed oil	0	0	0	0	5.752	0		61.4	13	25.6	0	0	0	0	0	0
			Palm oil	0	0	0	0	7.605	0		61.4923	12.9177	25.59	0	0	0	0	0	0
			Coconut oil	0.09	2	0	0.24	5.752	0.51768		61.4	13	25.6	0.317856	0.0672984	0.132526	0.317856	0.00269194	0.000444718
			Olive Oil	0.43	10	0	1.18	5.944	2.55592		89.1721	3.20831	7.61958	2.27917	0.0820018	0.19475	2.27917	0.00328007	0.000653525
			Rice bran oil	0	0	0	0	5.752	0		61.4	13	25.6	0	0	0	0	0	0
			Maize germ oil	0.52	13	0	1.42	5.752	2.99104		61.4	13	25.6	1.8365	0.388835	0.765706	1.8365	0.0155534	0.00256948
			Oilcrops oil, other	3.39	68	0.05	7.7	5.752	19.4993		61.4	13	25.6	11.9726	2.53491	4.99182	11.9726	0.101396	0.0167511
			Fats, animals, raw	0.58	103	0	11.39	6.733	3.90514		61.4	13	25.6	2.39776	0.507668	0.999716	2.39776	0.0203067	0.00335475
			Fish, body oil	0	0	0	0	6.733	0		61.4	13	25.6	0	0	0	0	0	0
			Fish, liver oil	0	0	0	0.01	6.733	0		61.4	13	25.6	0	0	0	0	0	0
			Sunflower seed	0	0	0	0	1.313	0		61.4	13	25.6	0	0	0	0	0	0
			Rape and mustardseed	0	4	0	0	1.313	0		65.1	3.3	31.6	0	0	0	0	0	0
			Sesame seed	0	0	0	0	1.313	0		61.4923	12.9177	25.59	0	0	0	0	0	0
			Palm kernels	0	0	0	0	1.313	0		56.142	28.9894	14.8685	0	0	0	0	0	0
			Olives (including preserved)	0.5	2	0.01	0.16	1.313	0.6565		89.1721	3.20831	7.61958	0.585415	0.0210625	0.0500225	0.585415	0.000842502	0.000167861
			Coconuts (including copra)	0.06	1	0.01	0.11	1.313	0.07878		61.4923	12.9177	25.59	0.0484436	0	0.0201598	0.0484436	0	6.76503e-05
	Beverages		Coffee	4.28	8	0.87	0	16.477	70.5216	171.324	53.6	0	46.4	37.7996	0	32.722	37.7996	0	0.109805	124.736	0.0742263	0.150796
			Wine	16.48	31	0	0	1.585	26.1208		79.6583	3.35563	17.7687	20.8074	0.876517	4.64134	20.8074	0.0350607	0.015575
			Beer	36.49	49	0.5	0	1.109	40.4674		95	0	5	38.444	0	2.02337	38.444	0	0.00678983
			Beverages, fermented	0	0	0	0	1.347	0		82	3	15	0	0	0	0	0	0
			Beverages, alcoholic	22.7	183	0	0	1.347	30.5769		82	3	15	25.0731	0.917307	4.58653	25.0731	0.0366923	0.0153911
			Tea (including mate)	0.3	0	0.08	0	12.124	3.6372		71.8	1.7	26.5	2.61151	0.0618324	0.963858	2.61151	0.0024733	0.00323442
	Other		Sugar cane	0	0	0	0	2.672	0	84.3252	74.1	1.1	24.8	0	0	0	0	0	0	44.9863	0.779125	0.0668691
			Sugar (non-centrifugal)	0	0	0	0	0.97	0		59.6	16.5	24	0	0	0	0	0	0
			Sugar beet	0	0	0	0	1.536	0		59.6	16.5	24	0	0	0	0	0	0
			Sugar (raw equivalent)	18.67	176	0	0	0.97	18.1099		30.4914	47.2261	22.2824	5.52197	8.55261	4.03533	5.52197	0.342104	0.0135414
			Sweeteners, other	32.48	86	0	0	0.97	31.5056		59.6	16.5	24	18.7773	5.19842	7.56134	18.7773	0.207937	0.0253736
			Honey	0.89	7	0.01	0	0.97	0.8633		59.6	16.5	24	0.514527	0.142444	0.207192	0.514527	0.00569778	0.000695275
			Cocoa beans	0	68	1.15	6.08	18.681	0		59.6	16.5	24	0	0	0	0	0	0
			Pepper	0.25	2	0.07	0.02	12.124	3.031		59.6	16.5	24	1.80648	0.500115	0.72744	1.80648	0.0200046	0.00244107
			Pimento	0.45	4	0.15	0.21	12.124	5.4558		59.6	16.5	24	3.25166	0.900207	1.30939	3.25166	0.0360083	0.00439393
			Cloves	0.01	0	0	0	12.124	0.12124		59.6	16.5	24	0.072259	0.0200046	0.0290976	0.072259	0.000800184	9.7643e-05
			Spices, other	0.62	6	0.17	0.23	12.124	7.51688		59.6	16.5	24	4.48006	1.24029	1.80405	4.48006	0.0496114	0.00605386
			Infant food	0	0	0	0	2.781	0		24.6	56.4	19	0	0	0	0	0	0
			Miscellaneous	2.59	3	0.08	0.04	6.84227	17.7215		59.6	16.5	24	10.562	2.92405	4.25316	10.562	0.116962	0.0142723
Finland	Grain products (non-rice)		Wheat	70.88	628	21.21	3.26	1.4	99.232	149.922	57.9	1.8	40.3	57.4553	1.78618	39.9905	57.4553	0.071447	0.134196	92.3959	0.106138	0.184137	5532000	6.56212e+09	3.41337e+08	1.48638e+07
			Barley	5.4	36	1.14	0.15	1.313	7.0902		54.569	1.91155	43.5195	3.86905	0.135533	3.08562	3.86905	0.00542132	0.0103544
			Maize	0	0	0	0	0.988	0		71.9	2.05597	26.1	0	0	0	0	0	0
			Millet	0	0	0	0	1.313	0		61.8	1.8	36.4	0	0	0	0	0	0
			Rye	25.63	202	5.13	0.72	1.4	35.882		73.3007	1.65211	25.0472	26.3017	0.592812	8.98744	26.3017	0.0237125	0.0301592
			Oats	4	25	0.98	0.47	1.575	6.3		61.8	1.8	36.4	3.8934	0.1134	2.2932	3.8934	0.004536	0.0076953
			Sorghum	0	0	0	0	1.313	0		61.8	1.8	36.4	0	0	0	0	0	0
			Cereals, other	1.08	11	0.3	0.03	1.313	1.41804		61.8	1.8	36.4	0.876349	0.0255247	0.516167	0.876349	0.00102099	0.0017321
	Rice		Rice (milled equivalent)	4.62	45	0.86	0.08	3.839	17.7362	17.7362	22.2	71.8	6	3.93743	12.7346	1.06417	3.93743	0.509383	0.00357104	3.93743	0.509383	0.00357104
	Fruit		Oranges, mandarines	15.11	18	0.31	0.07	0.317	4.78987	43.1995	56.9055	1.22138	41.8731	2.7257	0.0585024	2.00567	2.7257	0.0023401	0.00673043	30.5006	0.0424136	0.0390556
			Lemons, limes	1.29	1	0.01	0.01	0.317	0.40893		56.3759	0	43.6241	0.230538	0	0.178392	0.230538	0	0.00059863
			Grapefruit	0.44	0	0	0	0.317	0.13948		68.8513	2.47131	28.6774	0.0960338	0.00344698	0.0399993	0.0960338	0.000137879	0.000134226
			Citrus, other	0.26	0	0.01	0	0.317	0.08242		68.8513	2.47131	28.6774	0.0567472	0.00203685	0.0236359	0.0567472	8.1474e-05	7.93152e-05
			Bananas	17.7	30	0.39	0.05	0.678	12.0006		79.4125	3.10136	17.4861	9.52998	0.372181	2.09844	9.52998	0.0148872	0.00704175
			Plantains	0.02	0	0	0	0.6632	0.013264		68.8513	2.47131	28.6774	0.00913243	0.000327794	0.00380377	0.00913243	1.31118e-05	1.27643e-05
			Apples	8.8	14	0.07	0.08	0.357	3.1416		72.4477	2.06109	25.4912	2.27602	0.0647513	0.80083	2.27602	0.00259005	0.00268735
			Pineapples	3	6	0.03	0.01	0.6632	1.9896		68.8513	2.47131	28.6774	1.36986	0.0491691	0.570566	1.36986	0.00196676	0.00191465
			Dates	0.2	1	0.01	0	0.6632	0.13264		68.8513	2.47131	28.6774	0.0913243	0.00327794	0.0380377	0.0913243	0.000131118	0.000127643
			Grapes (excluding wine)	4.76	9	0.08	0.03	1.214	5.77864		68.8513	2.47131	28.6774	3.97867	0.142808	1.65716	3.97867	0.00571232	0.00556096
			Fruits, other	19.63	28	0.38	0.53	0.75	14.7225		68.8513	2.47131	28.6774	10.1366	0.363838	4.22203	10.1366	0.0145535	0.0141679
	Vegetables		Cassava	0	0	0	0	0.987	0	77.1098	83.6105	0.362596	16.0269	0	0	0	0	0	0	47.0753	0.084586	0.0936907
			Potatoes	56.57	105	2.44	0.14	0.37	20.9309		59.711	1.6649	38.6241	12.498	0.348479	8.08438	12.498	0.0139392	0.0271288
			Sweet potatoes	0.52	1	0.01	0	0.365	0.1898		65.672	2.57696	31.751	0.124645	0.00489108	0.0602634	0.124645	0.000195643	0.000202226
			Yams	0	0	0	0	0.365	0		65.672	2.57696	31.751	0	0	0	0	0	0
			Roots, other	0	0	0	0	0.365	0		65.672	2.57696	31.751	0	0	0	0	0	0
			Tomatoes	14.17	10	0.48	0.11	1.427	20.2206		53.5199	4.20609	42.274	10.822	0.850495	8.54805	10.822	0.0340198	0.0286847
			Onions	6.62	7	0.22	0.04	0.395	2.6149		71.3251	1.22109	27.4538	1.86508	0.0319303	0.71789	1.86508	0.00127721	0.00240903
			Vegetables, other	62.94	42	1.82	0.4	0.455	28.6377		65.672	2.57696	31.751	18.807	0.737983	9.09276	18.807	0.0295193	0.0305126
			Aquatic plants	0	0	0	0	0	0		65.672	2.57696	31.751	0	0	0	0	0	0
			Beans	0.02	0	0.01	0	1.61	0.0322		75.1226	5.04344	19.834	0.0241895	0.00162399	0.00638655	0.0241895	6.49595e-05	2.14314e-05
			Peas	1.1	10	0.69	0.04	0.896	0.9856		66.4257	5.15877	28.4155	0.654692	0.0508449	0.280063	0.654692	0.00203379	0.00093981
			Pulses, other	0.04	0	0.03	0	1.61	0.0644		65.672	2.57696	31.751	0.0422928	0.00165956	0.0204477	0.0422928	6.63826e-05	6.86163e-05
			Nuts	1.02	16	0.43	1.45	0.278	0.28356		62.5618	3.79852	33.6397	0.1774	0.0107711	0.0953886	0.1774	0.000430843	0.000320096
			Soybeans	0.2	0	0.03	0	1.8925	0.3785		63.3478	1.20151	35.4507	0.239771	0.0045477	0.134181	0.239771	0.000181908	0.000450271
			Groundnuts (shelled equivalents)	1.11	17	0.78	1.44	2.497	2.77167		65.672	2.57696	31.751	1.82021	0.0714249	0.880034	1.82021	0.002857	0.00295313
	Meat	Ruminant	Bovine meat	19.26	91	8.02	6.3	42.8	824.328	838.245	10.5	73	16.5	86.5544	601.759	136.014	86.5544	24.0704	0.456423	89.3795	24.3821	0.467491
			Mutton and goat meat	0.57	4	0.19	0.33	24.415	13.9165		20.3	56	23.7	2.82506	7.79327	3.29822	2.82506	0.311731	0.0110679
		Non-ruminant	Pig meat	37.69	360	9.78	35.38	7.282	274.459	466.842	47.5051	28.439	24.0559	130.382	78.0534	66.0234	130.382	3.12214	0.221555	230.735	4.03541	0.453764
			Poultry meat	19.4	70	8.2	3.9	6.092	118.185		53.86	5.83151	40.3085	63.6543	6.89196	47.6385	63.6543	0.275679	0.159861
			Meat, other	1.2	4	0.58	0.21	6.687	8.0244		49.4604	21.4829	29.0567	3.9689	1.72387	2.33162	3.9689	0.0689549	0.00782424
			Offals, edible	2.46	8	1.21	0.21	26.9	66.174		49.4604	21.4829	29.0567	32.7299	14.2161	19.228	32.7299	0.568643	0.0645234
	Seafood		Freshwater fish	17.65	28	4.46	1.03	4.005	70.6882	69.9169	49.4604	21.4829	29.0567	34.9627	15.1859	20.5397	34.9627	0.607435	0.0689251	96.9684	0.782545	0.0807824
			Demersal fish	3.13	6	0.78	0.3	4.005	12.5356		78.6427	5.32556	16.0317	9.85838	0.667594	2.00968	9.85838	0.0267038	0.00674388
			Pelagic fish	9.68	23	2.96	1.13	4.005	38.7684		91.6865	7.21239	1.10113	35.5454	2.79613	0.426891	35.5454	0.111845	0.00143252
			Marine fish, other	1.22	4	0.49	0.14	4.005	4.8861		89.095	4.66193	6.24304	4.35327	0.227787	0.305041	4.35327	0.00911147	0.00102363
			Crustaceans	1.62	1	0.27	0.02	7.3405	11.8916		89.095	4.66193	6.24304	10.5948	0.554379	0.742398	10.5948	0.0221752	0.00249127
			Cephalopods	0.05	0	0.02	0	7.3405	0.367025		89.095	4.66193	6.24304	0.327001	0.0171105	0.0229135	0.327001	0.000684418	7.6891e-05
			Molluscs, other	0.2	0	0.02	0	7.3405	1.4681		90.3737	7.81574	1.81055	1.32678	0.114743	0.0265806	1.32678	0.00458971	8.91967e-05
			Aquatic animals, others	0	0	0	0	6.6476	0		89.095	4.66193	6.24304	0	0	0	0	0	0
	Dairy		Cream	6.12	33	0.45	3.24	2.781	17.0197	1290.38	24.1	56.7	19.2	4.10175	9.65018	3.26779	4.10175	0.386007	0.0109657	288.336	30.222	0.827164
			Butter, ghee	5.49	108	0.14	12.2	2.781	15.2677		24.1	56.7	19.2	3.67951	8.65678	2.9314	3.67951	0.346271	0.0098369
			Milk (excluding butter) *includes cheese	349.47	500	34.49	33.52	3.6	1258.09		22.3	58.6	19.1	280.555	737.242	240.296	280.555	29.4897	0.806361
	Eggs		Eggs	10.77	42	3.37	2.93	4.507	48.5404	48.5404	41.5	6.5	52	20.1443	3.15513	25.241	20.1443	0.126205	0.0847014	20.1443	0.126205	0.0847014
	Oils		Oilcrops, other	0.7	14	0	1.64	1.313	0.9191	9.92542	61.4	13	25.6	0.564327	0.119483	0.23529	0.564327	0.00477932	0.000789562	7.18783	0.0353398	0.00620473
			Soybean oil	0	5	0	0.6	6.117	0		61.4	13	25.6	0	0	0	0	0	0
			Groundnut oil	0	0	0	0	5.752	0		61.4	13	25.6	0	0	0	0	0	0
			Sunflowerseed oil	0.93	23	0	2.56	3.607	3.35451		61.4	13	25.6	2.05967	0.436086	0.858755	2.05967	0.0174435	0.00288173
			Rape and mustard oil	0.05	164	0.14	18.41	3.828	0.1914		65.1	3.3	31.6	0.124601	0.0063162	0.0604824	0.124601	0.000252648	0.000202961
			Cottonseed oil	0	0	0	0	5.752	0		61.4	13	25.6	0	0	0	0	0	0
			Palmkernel oil	0	0	0	0	5.752	0		56.142	28.9894	14.8685	0	0	0	0	0	0
			Sesame seed oil	0.01	0	0	0.02	5.752	0.05752		61.4	13	25.6	0.0353173	0.0074776	0.0147251	0.0353173	0.000299104	4.94132e-05
			Palm oil	0	1	0	0.14	7.605	0		61.4923	12.9177	25.59	0	0	0	0	0	0
			Coconut oil	0	1	0	0.1	5.752	0		61.4	13	25.6	0	0	0	0	0	0
			Olive Oil	0.53	13	0	1.45	5.944	3.15032		89.1721	3.20831	7.61958	2.80921	0.101072	0.240041	2.80921	0.00404288	0.000805507
			Rice bran oil	0	0	0	0	5.752	0		61.4	13	25.6	0	0	0	0	0	0
			Maize germ oil	0	0	0	0	5.752	0		61.4	13	25.6	0	0	0	0	0	0
			Oilcrops oil, other	0	0	0	0	5.752	0		61.4	13	25.6	0	0	0	0	0	0
			Fats, animals, raw	0.19	48	0	5.38	6.733	1.27927		61.4	13	25.6	0.785472	0.166305	0.327493	0.785472	0.0066522	0.00109897
			Fish, body oil	0	0	0	0	6.733	0		61.4	13	25.6	0	0	0	0	0	0
			Fish, liver oil	0.01	0	0	0.03	6.733	0.06733		61.4	13	25.6	0.0413406	0.0087529	0.0172365	0.0413406	0.000350116	5.78405e-05
			Sunflower seed	0	0	0	0	1.313	0		61.4	13	25.6	0	0	0	0	0	0
			Rape and mustardseed	0	0	0	0	1.313	0		65.1	3.3	31.6	0	0	0	0	0	0
			Sesame seed	0.08	1	0.04	0.11	1.313	0.10504		61.4923	12.9177	25.59	0.0645915	0.0135688	0.0268797	0.0645915	0.00054275	9.02004e-05
			Palm kernels	0	0	0	0	1.313	0		56.142	28.9894	14.8685	0	0	0	0	0	0
			Olives (including preserved)	0.58	2	0.02	0.18	1.313	0.76154		89.1721	3.20831	7.61958	0.679081	0.0244326	0.0580262	0.679081	0.000977302	0.000194719
			Coconuts (including copra)	0.03	0	0	0.03	1.313	0.03939		61.4923	12.9177	25.59	0.0242218	0	0.0100799	0.0242218	0	3.38252e-05
	Beverages		Coffee	11.77	15	2.05	0	16.477	193.934	302.678	53.6	0	46.4	103.949	0	89.9855	103.949	0	0.301965	202.926	0.0342523	0.332383
			Wine	12.45	23	0	0	1.585	19.7332		79.6583	3.35563	17.7687	15.7192	0.662175	3.50635	15.7192	0.026487	0.0117663
			Beer	73.29	98	1	0	1.109	81.2786		95	0	5	77.2147	0	4.06393	77.2147	0	0.0136374
			Beverages, fermented	0.58	1	0	0	1.347	0.78126		82	3	15	0.640633	0.0234378	0.117189	0.640633	0.000937512	0.000393252
			Beverages, alcoholic	3	24	0	0	1.347	4.041		82	3	15	3.31362	0.12123	0.60615	3.31362	0.0048492	0.00203406
			Tea (including mate)	0.24	0	0.06	0	12.124	2.90976		71.8	1.7	26.5	2.08921	0.0494659	0.771086	2.08921	0.00197864	0.00258754
	Other		Sugar cane	0	0	0	0	2.672	0	144.011	74.1	1.1	24.8	0	0	0	0	0	0	76.6245	1.342	0.113924
			Sugar (non-centrifugal)	0	0	0	0	0.97	0		59.6	16.5	24	0	0	0	0	0	0
			Sugar beet	0	0	0	0	1.536	0		59.6	16.5	24	0	0	0	0	0	0
			Sugar (raw equivalent)	29.64	279	0	0	0.97	28.7508		30.4914	47.2261	22.2824	8.76653	13.5779	6.40638	8.76653	0.543116	0.0214979
			Sweeteners, other	11.13	26	0	0	0.97	10.7961		59.6	16.5	24	6.43448	1.78136	2.59106	6.43448	0.0712543	0.00869485
			Honey	0.51	4	0.01	0	0.97	0.4947		59.6	16.5	24	0.294841	0.0816255	0.118728	0.294841	0.00326502	0.000398416
			Cocoa beans	0	25	0.45	2.22	18.681	0		59.6	16.5	24	0	0	0	0	0	0
			Pepper	0.1	1	0.03	0.01	12.124	1.2124		59.6	16.5	24	0.72259	0.200046	0.290976	0.72259	0.00800184	0.00097643
			Pimento	0.07	1	0.02	0.04	12.124	0.84868		59.6	16.5	24	0.505813	0.140032	0.203683	0.505813	0.00560129	0.000683501
			Cloves	0	0	0	0	12.124	0		59.6	16.5	24	0	0	0	0	0	0
			Spices, other	0.2	2	0.05	0.08	12.124	2.4248		59.6	16.5	24	1.44518	0.400092	0.581952	1.44518	0.0160037	0.00195286
			Infant food	0.86	9	0.36	0.07	2.781	2.39166		24.6	56.4	19	0.588348	1.3489	0.454415	0.588348	0.0539558	0.00152488
			Miscellaneous	14.19	16	0.47	0.19	6.84227	97.0919		59.6	16.5	24	57.8667	16.0202	23.302	57.8667	0.640806	0.0781948
France	Grain products (non-rice)		Wheat	116.22	871	28.01	4.1	1.4	162.708	178.397	57.9	1.8	40.3	94.2079	2.92874	65.5713	94.2079	0.11715	0.220038	105.267	0.129782	0.23454	65130000	7.23366e+10	3.33293e+09	1.548e+08
			Barley	0.36	2	0.05	0.01	1.313	0.47268		54.569	1.91155	43.5195	0.257937	0.00903553	0.205708	0.257937	0.000361421	0.000690295
			Maize	13.34	103	2.39	0.33	0.988	13.1799		71.9	2.05597	26.1	9.47636	0.270976	3.43996	9.47636	0.010839	0.0115435
			Millet	0	0	0	0	1.313	0		61.8	1.8	36.4	0	0	0	0	0	0
			Rye	0.41	3	0.07	0.01	1.4	0.574		73.3007	1.65211	25.0472	0.420746	0.00948314	0.143771	0.420746	0.000379325	0.000482453
			Oats	0.77	4	0.17	0.08	1.575	1.21275		61.8	1.8	36.4	0.749479	0.0218295	0.441441	0.749479	0.00087318	0.00148135
			Sorghum	0	0	0	0	1.313	0		61.8	1.8	36.4	0	0	0	0	0	0
			Cereals, other	0.19	2	0.05	0.01	1.313	0.24947		61.8	1.8	36.4	0.154172	0.00449046	0.0908071	0.154172	0.000179618	0.000304722
	Rice		Rice (milled equivalent)	7.26	54	1.05	0.11	3.839	27.8711	27.8711	22.2	71.8	6	6.18739	20.0115	1.67227	6.18739	0.800459	0.00561164	6.18739	0.800459	0.00561164
	Fruit		Oranges, mandarines	24.11	23	0.4	0.09	0.317	7.64287	48.5879	56.9055	1.22138	41.8731	4.34921	0.0933484	3.20031	4.34921	0.00373394	0.0107393	33.055	0.0440487	0.0484285
			Lemons, limes	2.18	1	0.02	0.02	0.317	0.69106		56.3759	0	43.6241	0.389592	0	0.301468	0.389592	0	0.00101164
			Grapefruit	1.05	2	0.03	0.01	0.317	0.33285		68.8513	2.47131	28.6774	0.229171	0.00822574	0.0954528	0.229171	0.00032903	0.000320311
			Citrus, other	0.07	0	0	0	0.317	0.02219		68.8513	2.47131	28.6774	0.0152781	0.000548383	0.00636352	0.0152781	2.19353e-05	2.13541e-05
			Bananas	6.56	11	0.14	0.02	0.678	4.44768		79.4125	3.10136	17.4861	3.53201	0.137938	0.777727	3.53201	0.00551753	0.00260982
			Plantains	0.37	1	0.01	0	0.6632	0.245384		68.8513	2.47131	28.6774	0.16895	0.00606419	0.0703698	0.16895	0.000242568	0.00023614
			Apples	10.21	12	0.06	0.07	0.357	3.64497		72.4477	2.06109	25.4912	2.6407	0.0751263	0.929145	2.6407	0.00300505	0.00311794
			Pineapples	2.73	4	0.02	0.01	0.6632	1.81054		68.8513	2.47131	28.6774	1.24658	0.0447439	0.519215	1.24658	0.00178976	0.00174233
			Dates	0.34	2	0.02	0	0.6632	0.225488		68.8513	2.47131	28.6774	0.155251	0.0055725	0.0646641	0.155251	0.0002229	0.000216994
			Grapes (excluding wine)	6.67	5	0.05	0.01	1.214	8.09738		68.8513	2.47131	28.6774	5.57515	0.200111	2.32212	5.57515	0.00800444	0.00779235
			Fruits, other	28.57	43	0.53	0.98	0.75	21.4275		68.8513	2.47131	28.6774	14.7531	0.529539	6.14485	14.7531	0.0211816	0.0206203
	Vegetables		Cassava	0	0	0	0	0.987	0	90.7515	83.6105	0.362596	16.0269	0	0	0	0	0	0	54.9862	0.107065	0.111035
			Potatoes	49.18	91	2.12	0.13	0.37	18.1966		59.711	1.6649	38.6241	10.8654	0.302956	7.02828	10.8654	0.0121182	0.0235848
			Sweet potatoes	0	0	0	0	0.365	0		65.672	2.57696	31.751	0	0	0	0	0	0
			Yams	0.06	0	0	0	0.365	0.0219		65.672	2.57696	31.751	0.0143822	0.000564355	0.00695347	0.0143822	2.25742e-05	2.33338e-05
			Roots, other	0.32	1	0.02	0	0.365	0.1168		65.672	2.57696	31.751	0.0767049	0.00300989	0.0370852	0.0767049	0.000120396	0.000124447
			Tomatoes	21.46	11	0.53	0.12	1.427	30.6234		53.5199	4.20609	42.274	16.3896	1.28805	12.9457	16.3896	0.0515219	0.0434421
			Onions	6.39	7	0.21	0.03	0.395	2.52405		71.3251	1.22109	27.4538	1.80028	0.030821	0.692948	1.80028	0.00123284	0.00232533
			Vegetables, other	71.2	55	2.7	0.43	0.455	32.396		65.672	2.57696	31.751	21.2751	0.834833	10.2861	21.2751	0.0333933	0.034517
			Aquatic plants	0	0	0	0	0	0		65.672	2.57696	31.751	0	0	0	0	0	0
			Beans	0.6	6	0.35	0.03	1.61	0.966		75.1226	5.04344	19.834	0.725684	0.0487196	0.191596	0.725684	0.00194879	0.000642941
			Peas	0.26	2	0.16	0.01	0.896	0.23296		66.4257	5.15877	28.4155	0.154745	0.0120179	0.0661968	0.154745	0.000480715	0.000222137
			Pulses, other	0.86	8	0.54	0.04	1.61	1.3846		65.672	2.57696	31.751	0.909295	0.0356806	0.439625	0.909295	0.00142723	0.00147525
			Nuts	4.01	31	0.81	2.75	0.278	1.11478		62.5618	3.79852	33.6397	0.697427	0.0423451	0.375008	0.697427	0.0016938	0.00125842
			Soybeans	0.16	0	0.02	0	1.8925	0.3028		63.3478	1.20151	35.4507	0.191817	0.00363816	0.107345	0.191817	0.000145526	0.000360217
			Groundnuts (shelled equivalents)	1.15	18	0.82	1.52	2.497	2.87155		65.672	2.57696	31.751	1.8858	0.0739988	0.911747	1.8858	0.00295995	0.00305955
	Meat	Ruminant	Bovine meat	20.69	66	8.17	3.5	42.8	885.532	952.429	10.5	73	16.5	92.9809	646.438	146.113	92.9809	25.8575	0.490311	106.561	27.356	0.543515
			Mutton and goat meat	2.74	17	0.95	1.45	24.415	66.8971		20.3	56	23.7	13.5801	37.4624	15.8546	13.5801	1.4985	0.0532034
		Non-ruminant	Pig meat	31.45	244	8.29	23.14	7.282	229.019	530.634	47.5051	28.439	24.0559	108.796	65.1308	55.0925	108.796	2.60523	0.184874	264.137	4.32023	0.531847
			Poultry meat	22.99	95	8.91	6.31	6.092	140.055		53.86	5.83151	40.3085	75.4336	8.16733	56.4541	75.4336	0.326693	0.189443
			Meat, other	1.11	4	0.75	0.12	6.687	7.42257		49.4604	21.4829	29.0567	3.67123	1.59458	2.15675	3.67123	0.0637833	0.00723743
			Offals, edible	5.73	17	2.88	0.5	26.9	154.137		49.4604	21.4829	29.0567	76.2368	33.1131	44.7871	76.2368	1.32452	0.150292
	Seafood		Freshwater fish	3.84	7	1.16	0.27	4.005	15.3792	150.748	49.4604	21.4829	29.0567	7.60662	3.3039	4.46869	7.60662	0.132156	0.0149956	137.943	0.503941	0.0522999
			Demersal fish	12.43	26	3.24	1.33	4.005	49.7821		78.6427	5.32556	16.0317	39.15	2.65118	7.98092	39.15	0.106047	0.0267816
			Pelagic fish	7.15	18	2.23	0.92	4.005	28.6358		91.6865	7.21239	1.10113	26.2551	2.06532	0.315317	26.2551	0.0826128	0.00105811
			Marine fish, other	0.12	0	0.05	0.02	4.005	0.4806		89.095	4.66193	6.24304	0.428191	0.0224052	0.0300041	0.428191	0.00089621	0.000100685
			Crustaceans	3.67	5	0.97	0.05	7.3405	26.9396		89.095	4.66193	6.24304	24.0019	1.25591	1.68185	24.0019	0.0502363	0.0056438
			Cephalopods	0.89	2	0.35	0.03	7.3405	6.53304		89.095	4.66193	6.24304	5.82062	0.304566	0.407861	5.82062	0.0121826	0.00136866
			Molluscs, other	5.21	3	0.49	0.06	7.3405	38.244		90.3737	7.81574	1.81055	34.5625	2.98905	0.692425	34.5625	0.119562	0.00232357
			Aquatic animals, others	0.02	0	0	0	6.6476	0.132952		89.095	4.66193	6.24304	0.118454	0.00619813	0.00830025	0.118454	0.000247925	2.78532e-05
	Dairy		Cream	5.23	28	0.39	2.77	2.781	14.5446	700.262	24.1	56.7	19.2	3.50526	8.24681	2.79257	3.50526	0.329872	0.00937104	156.775	16.3881	0.448941
			Butter, ghee	7.09	139	0.17	15.75	2.781	19.7173		24.1	56.7	19.2	4.75187	11.1797	3.78572	4.75187	0.447188	0.0127038
			Milk (excluding butter) *includes cheese	185	323	21.77	20.69	3.6	666		22.3	58.6	19.1	148.518	390.276	127.206	148.518	15.611	0.426866
	Eggs		Eggs	11.72	45	3.65	3.17	4.507	52.822	52.822	41.5	6.5	52	21.9211	3.43343	27.4675	21.9211	0.137337	0.0921727	21.9211	0.137337	0.0921727
	Oils		Oilcrops, other	0	0	0	0	1.313	0	89.1724	61.4	13	25.6	0	0	0	0	0	0	58.4684	0.371045	0.0718149
			Soybean oil	3.91	95	0	10.71	6.117	23.9175		61.4	13	25.6	14.6853	3.10927	6.12287	14.6853	0.124371	0.0205466
			Groundnut oil	0.14	3	0	0.38	5.752	0.80528		61.4	13	25.6	0.494442	0.104686	0.206152	0.494442	0.00418746	0.000691784
			Sunflowerseed oil	5.99	145	0	16.41	3.607	21.6059		61.4	13	25.6	13.266	2.80877	5.53112	13.266	0.112351	0.0185608
			Rape and mustard oil	3.04	74	0	8.32	3.828	11.6371		65.1	3.3	31.6	7.57577	0.384025	3.67733	7.57577	0.015361	0.01234
			Cottonseed oil	0.03	1	0	0.07	5.752	0.17256		61.4	13	25.6	0.105952	0.0224328	0.0441754	0.105952	0.000897312	0.000148239
			Palmkernel oil	0	7	0.01	0.76	5.752	0		56.142	28.9894	14.8685	0	0	0	0	0	0
			Sesame seed oil	0.08	2	0	0.23	5.752	0.46016		61.4	13	25.6	0.282538	0.0598208	0.117801	0.282538	0.00239283	0.000395305
			Palm oil	0.46	11	0	1.26	7.605	3.4983		61.4923	12.9177	25.59	2.15119	0.4519	0.895214	2.15119	0.018076	0.00300408
			Coconut oil	0	23	0.02	2.63	5.752	0		61.4	13	25.6	0	0	0	0	0	0
			Olive Oil	1.73	42	0	4.75	5.944	10.2831		89.1721	3.20831	7.61958	9.16968	0.329914	0.783531	9.16968	0.0131966	0.0026293
			Rice bran oil	0	0	0	0	5.752	0		61.4	13	25.6	0	0	0	0	0	0
			Maize germ oil	0.64	15	0	1.75	5.752	3.68128		61.4	13	25.6	2.26031	0.478566	0.942408	2.26031	0.0191427	0.00316244
			Oilcrops oil, other	0.22	4	0	0.5	5.752	1.26544		61.4	13	25.6	0.77698	0.164507	0.323953	0.77698	0.00658029	0.00108709
			Fats, animals, raw	1.19	70	0.02	7.79	6.733	8.01227		61.4	13	25.6	4.91953	1.0416	2.05114	4.91953	0.0416638	0.00688302
			Fish, body oil	0.29	7	0	0.8	6.733	1.95257		61.4	13	25.6	1.19888	0.253834	0.499858	1.19888	0.0101534	0.00167738
			Fish, liver oil	0.02	1	0	0.06	6.733	0.13466		61.4	13	25.6	0.0826812	0.0175058	0.034473	0.0826812	0.000700232	0.000115681
			Sunflower seed	0	0	0	0	1.313	0		61.4	13	25.6	0	0	0	0	0	0
			Rape and mustardseed	0	2	0	0	1.313	0		65.1	3.3	31.6	0	0	0	0	0	0
			Sesame seed	0	0	0	0	1.313	0		61.4923	12.9177	25.59	0	0	0	0	0	0
			Palm kernels	0	0	0	0	1.313	0		56.142	28.9894	14.8685	0	0	0	0	0	0
			Olives (including preserved)	1.17	3	0.04	0.36	1.313	1.53621		89.1721	3.20831	7.61958	1.36987	0.0492864	0.117053	1.36987	0.00197145	0.000392795
			Coconuts (including copra)	0.16	2	0.02	0.21	1.313	0.21008		61.4923	12.9177	25.59	0.129183	0	0.0537594	0.129183	0	0.000180401
	Beverages		Coffee	5.23	7	0.82	0	16.477	86.1747	195.16	53.6	0	46.4	46.1896	0	39.9851	46.1896	0	0.134178	137.657	0.102184	0.18603
			Wine	39.38	74	0	0	1.585	62.4173		79.6583	3.35563	17.7687	49.7205	2.09449	11.0908	49.7205	0.0837797	0.0372173
			Beer	26.93	36	0.37	0	1.109	29.8654		95	0	5	28.3721	0	1.49327	28.3721	0	0.00501097
			Beverages, fermented	7.8	10	0.02	0	1.347	10.5066		82	3	15	8.61541	0.315198	1.57599	8.61541	0.0126079	0.00528856
			Beverages, alcoholic	2.26	18	0	0	1.347	3.04422		82	3	15	2.49626	0.0913266	0.456633	2.49626	0.00365306	0.00153233
			Tea (including mate)	0.26	0	0.07	0	12.124	3.15224		71.8	1.7	26.5	2.26331	0.0535881	0.835344	2.26331	0.00214352	0.00280317
	Other		Sugar cane	0	0	0	0	2.672	0	65.5582	74.1	1.1	24.8	0	0	0	0	0	0	27.6911	0.91325	0.0505449
			Sugar (non-centrifugal)	0	0	0	0	0.97	0		59.6	16.5	24	0	0	0	0	0	0
			Sugar beet	0	0	0	0	1.536	0		59.6	16.5	24	0	0	0	0	0	0
			Sugar (raw equivalent)	40.31	393	0	0	0.97	39.1007		30.4914	47.2261	22.2824	11.9224	18.4658	8.71258	11.9224	0.73863	0.0292369
			Sweeteners, other	1.77	10	0	0	0.97	1.7169		59.6	16.5	24	1.02327	0.283288	0.412056	1.02327	0.0113315	0.00138274
			Honey	0.54	4	0.01	0	0.97	0.5238		59.6	16.5	24	0.312185	0.086427	0.125712	0.312185	0.00345708	0.000421852
			Cocoa beans	0	24	0.79	1.97	18.681	0		59.6	16.5	24	0	0	0	0	0	0
			Pepper	0.08	1	0.02	0.01	12.124	0.96992		59.6	16.5	24	0.578072	0.160037	0.232781	0.578072	0.00640147	0.000781144
			Pimento	0.05	0	0.02	0.02	12.124	0.6062		59.6	16.5	24	0.361295	0.100023	0.145488	0.361295	0.00400092	0.000488215
			Cloves	0.18	2	0.06	0.06	12.124	2.18232		59.6	16.5	24	1.30066	0.360083	0.523757	1.30066	0.0144033	0.00175757
			Spices, other	0	0	0	0	12.124	0		59.6	16.5	24	0	0	0	0	0	0
			Infant food	0	0	0	0	2.781	0		24.6	56.4	19	0	0	0	0	0	0
			Miscellaneous	2.99	3	0.1	0.04	6.84227	20.4584		59.6	16.5	24	12.1932	3.37564	4.91001	12.1932	0.135025	0.0164766
Georgia	Grain products (non-rice)		Wheat	138.17	1037	30.56	5.07	1.4	193.438	233.182	57.9	1.8	40.3	112.001	3.48188	77.9555	112.001	0.139275	0.261596	138.138	0.170737	0.30466	3997000	2.58584e+09	9.72846e+07	5.74812e+06
			Barley	8.08	50	1.39	0.16	1.313	10.609		54.569	1.91155	43.5195	5.78924	0.202797	4.617	5.78924	0.0081119	0.0154933
			Maize	23.46	210	4.86	0.69	0.988	23.1785		71.9	2.05597	26.1	16.6653	0.476544	6.04958	16.6653	0.0190617	0.0203006
			Millet	0	0	0	0	1.313	0		61.8	1.8	36.4	0	0	0	0	0	0
			Rye	0.01	0	0	0	1.4	0.014		73.3007	1.65211	25.0472	0.0102621	0.000231296	0.00350661	0.0102621	9.25184e-06	1.17671e-05
			Oats	0.83	9	0.37	0.14	1.575	1.30725		61.8	1.8	36.4	0.80788	0.0235305	0.475839	0.80788	0.00094122	0.00159678
			Sorghum	0	0	0	0	1.313	0		61.8	1.8	36.4	0	0	0	0	0	0
			Cereals, other	3.53	34	0.87	0.13	1.313	4.63489		61.8	1.8	36.4	2.86436	0.083428	1.6871	2.86436	0.00333712	0.00566141
	Rice		Rice (milled equivalent)	2.46	24	0.46	0.06	3.839	9.44394	9.44394	22.2	71.8	6	2.09655	6.78075	0.566636	2.09655	0.27123	0.00190146	2.09655	0.27123	0.00190146
	Fruit		Oranges, mandarines	10.69	10	0.16	0.03	0.317	3.38873	31.8712	56.9055	1.22138	41.8731	1.92837	0.0413892	1.41897	1.92837	0.00165557	0.00476164	21.9403	0.0302831	0.0307846
			Lemons, limes	1.2	0	0.02	0.01	0.317	0.3804		56.3759	0	43.6241	0.214454	0	0.165946	0.214454	0	0.000556865
			Grapefruit	0.28	0	0	0	0.317	0.08876		68.8513	2.47131	28.6774	0.0611124	0.00219353	0.0254541	0.0611124	8.77413e-05	8.54164e-05
			Citrus, other	0.01	0	0	0	0.317	0.00317		68.8513	2.47131	28.6774	0.00218259	7.83404e-05	0.000909074	0.00218259	3.13362e-06	3.05058e-06
			Bananas	5.82	10	0.11	0.05	0.678	3.94596		79.4125	3.10136	17.4861	3.13359	0.122378	0.689996	3.13359	0.00489513	0.00231542
			Plantains	0	0	0	0	0.6632	0		68.8513	2.47131	28.6774	0	0	0	0	0	0
			Apples	2.5	4	0.01	0.02	0.357	0.8925		72.4477	2.06109	25.4912	0.646596	0.0183953	0.227509	0.646596	0.000735811	0.000763452
			Pineapples	0.33	0	0	0	0.6632	0.218856		68.8513	2.47131	28.6774	0.150685	0.0054086	0.0627622	0.150685	0.000216344	0.000210612
			Dates	0.11	0	0	0	0.6632	0.072952		68.8513	2.47131	28.6774	0.0502284	0.00180287	0.0209207	0.0502284	7.21147e-05	7.02039e-05
			Grapes (excluding wine)	9.24	14	0.13	0.09	1.214	11.2174		68.8513	2.47131	28.6774	7.7233	0.277215	3.21685	7.7233	0.0110886	0.0107948
			Fruits, other	15.55	20	0.27	0.18	0.75	11.6625		68.8513	2.47131	28.6774	8.02978	0.288216	3.3445	8.02978	0.0115286	0.0112232
	Vegetables		Cassava	0.01	0	0	0	0.987	0.00987	63.5543	83.6105	0.362596	16.0269	0.00825235	3.57883e-05	0.00158186	0.00825235	1.43153e-06	5.30825e-06	37.5718	0.0752739	0.0808748
			Potatoes	47.11	88	2.06	0.13	0.37	17.4307		59.711	1.6649	38.6241	10.408	0.290204	6.73246	10.408	0.0116082	0.0225921
			Sweet potatoes	0	0	0	0	0.365	0		65.672	2.57696	31.751	0	0	0	0	0	0
			Yams	0	0	0	0	0.365	0		65.672	2.57696	31.751	0	0	0	0	0	0
			Roots, other	0	0	0	0	0.365	0		65.672	2.57696	31.751	0	0	0	0	0	0
			Tomatoes	19.07	9	0.43	0.11	1.427	27.2129		53.5199	4.20609	42.274	14.5643	1.1446	11.504	14.5643	0.0457839	0.0386039
			Onions	8.94	8	0.27	0.05	0.395	3.5313		71.3251	1.22109	27.4538	2.5187	0.0431204	0.969477	2.5187	0.00172482	0.00325328
			Vegetables, other	28.72	19	0.8	0.15	0.455	13.0676		65.672	2.57696	31.751	8.58176	0.336747	4.1491	8.58176	0.0134699	0.0139231
			Aquatic plants	0	0	0	0	0	0		65.672	2.57696	31.751	0	0	0	0	0	0
			Beans	0	0	0	0	1.61	0		75.1226	5.04344	19.834	0	0	0	0	0	0
			Peas	0	0	0	0	0.896	0		66.4257	5.15877	28.4155	0	0	0	0	0	0
			Pulses, other	0.03	0	0.02	0	1.61	0.0483		65.672	2.57696	31.751	0.0317196	0.00124467	0.0153357	0.0317196	4.97869e-05	5.14622e-05
			Nuts	2.38	20	0.47	1.88	0.278	0.66164		62.5618	3.79852	33.6397	0.413934	0.0251325	0.222573	0.413934	0.0010053	0.000746891
			Soybeans	0.01	0	0	0	1.8925	0.018925		63.3478	1.20151	35.4507	0.0119886	0.000227385	0.00670904	0.0119886	9.0954e-06	2.25136e-05
			Groundnuts (shelled equivalents)	0.63	10	0.44	0.83	2.497	1.57311		65.672	2.57696	31.751	1.03309	0.0405385	0.499479	1.03309	0.00162154	0.0016761
	Meat	Ruminant	Bovine meat	6.34	35	2.58	2.66	42.8	271.352	291.128	10.5	73	16.5	28.492	198.087	44.7731	28.492	7.92348	0.150245	32.5065	8.36646	0.165973
			Mutton and goat meat	0.81	6	0.3	0.5	24.415	19.7762		20.3	56	23.7	4.01456	11.0746	4.68695	4.01456	0.442986	0.015728
		Non-ruminant	Pig meat	10.2	48	2.57	4.08	7.282	74.2764	226.358	47.5051	28.439	24.0559	35.2851	21.1235	17.8678	35.2851	0.84494	0.0599592	114.933	1.52174	0.246246
			Poultry meat	16.52	55	5.64	3.46	6.092	100.64		53.86	5.83151	40.3085	54.2046	5.86883	40.5664	54.2046	0.234753	0.136129
			Meat, other	0.13	1	0.11	0.01	6.687	0.86931		49.4604	21.4829	29.0567	0.429964	0.186753	0.252593	0.429964	0.00747011	0.000847627
			Offals, edible	1.88	6	0.95	0.14	26.9	50.572		49.4604	21.4829	29.0567	25.0131	10.8643	14.6945	25.0131	0.434573	0.0493106
	Seafood		Freshwater fish	1.18	2	0.31	0.07	4.005	4.7259	31.2855	49.4604	21.4829	29.0567	2.33745	1.01526	1.37319	2.33745	0.0406104	0.00460802	30.5554	0.122952	0.0079939
			Demersal fish	0.58	1	0.11	0.01	4.005	2.3229		78.6427	5.32556	16.0317	1.82679	0.123707	0.3724	1.82679	0.0049483	0.00124967
			Pelagic fish	5.61	13	1.79	0.56	4.005	22.4681		91.6865	7.21239	1.10113	20.6002	1.62048	0.247403	20.6002	0.0648193	0.000830211
			Marine fish, other	1.42	3	0.39	0.09	4.005	5.6871		89.095	4.66193	6.24304	5.06692	0.265129	0.355048	5.06692	0.0106051	0.00119144
			Crustaceans	0.05	0	0.01	0	7.3405	0.367025		89.095	4.66193	6.24304	0.327001	0.0171105	0.0229135	0.327001	0.000684418	7.6891e-05
			Cephalopods	0.01	0	0	0	7.3405	0.073405		89.095	4.66193	6.24304	0.0654002	0.00342209	0.0045827	0.0654002	0.000136884	1.53782e-05
			Molluscs, other	0.05	0	0	0	7.3405	0.367025		90.3737	7.81574	1.81055	0.331694	0.0286857	0.00664516	0.331694	0.00114743	2.22992e-05
			Aquatic animals, others	0	0	0	0	6.6476	0		89.095	4.66193	6.24304	0	0	0	0	0	0
	Dairy		Cream	0.12	1	0.01	0.07	2.781	0.33372	528.335	24.1	56.7	19.2	0.0804265	0.189219	0.0640742	0.0804265	0.00756877	0.000215014	117.885	12.3814	0.338643
			Butter, ghee	1.2	24	0.03	2.68	2.781	3.3372		24.1	56.7	19.2	0.804265	1.89219	0.640742	0.804265	0.0756877	0.00215014
			Milk (excluding butter) *includes cheese	145.74	255	13.72	13.87	3.6	524.664		22.3	58.6	19.1	117	307.453	100.211	117	12.2981	0.336278
	Eggs		Eggs	8.58	33	2.52	2.31	4.507	38.6701	38.6701	41.5	6.5	52	16.0481	2.51355	20.1084	16.0481	0.100542	0.067478	16.0481	0.100542	0.067478
	Oils		Oilcrops, other	0	0	0	0	1.313	0	47.7714	61.4	13	25.6	0	0	0	0	0	0	29.5102	0.245559	0.0406613
			Soybean oil	0	0	0	0	6.117	0		61.4	13	25.6	0	0	0	0	0	0
			Groundnut oil	0	0	0	0	5.752	0		61.4	13	25.6	0	0	0	0	0	0
			Sunflowerseed oil	5.15	125	0	14.1	3.607	18.5761		61.4	13	25.6	11.4057	2.41489	4.75547	11.4057	0.0965955	0.0159579
			Rape and mustard oil	0.01	0	0	0.03	3.828	0.03828		65.1	3.3	31.6	0.0249203	0.00126324	0.0120965	0.0249203	5.05296e-05	4.05922e-05
			Cottonseed oil	0	0	0	0	5.752	0		61.4	13	25.6	0	0	0	0	0	0
			Palmkernel oil	0	0	0	0	5.752	0		56.142	28.9894	14.8685	0	0	0	0	0	0
			Sesame seed oil	0	0	0	0	5.752	0		61.4	13	25.6	0	0	0	0	0	0
			Palm oil	0	0	0	0	7.605	0		61.4923	12.9177	25.59	0	0	0	0	0	0
			Coconut oil	0.09	2	0	0.25	5.752	0.51768		61.4	13	25.6	0.317856	0.0672984	0.132526	0.317856	0.00269194	0.000444718
			Olive Oil	0.03	1	0	0.09	5.944	0.17832		89.1721	3.20831	7.61958	0.159012	0.00572106	0.0135872	0.159012	0.000228842	4.55948e-05
			Rice bran oil	0	0	0	0	5.752	0		61.4	13	25.6	0	0	0	0	0	0
			Maize germ oil	0.24	6	0	0.67	5.752	1.38048		61.4	13	25.6	0.847615	0.179462	0.353403	0.847615	0.0071785	0.00118592
			Oilcrops oil, other	2.91	58	0.05	6.51	5.752	16.7383		61.4	13	25.6	10.2773	2.17598	4.28501	10.2773	0.0870393	0.0143792
			Fats, animals, raw	1.46	71	0.21	7.89	6.733	9.83018		61.4	13	25.6	6.03573	1.27792	2.51653	6.03573	0.0511169	0.00844472
			Fish, body oil	0	0	0	0	6.733	0		61.4	13	25.6	0	0	0	0	0	0
			Fish, liver oil	0	0	0	0	6.733	0		61.4	13	25.6	0	0	0	0	0	0
			Sunflower seed	0	0	0	0	1.313	0		61.4	13	25.6	0	0	0	0	0	0
			Rape and mustardseed	0	0	0	0	1.313	0		65.1	3.3	31.6	0	0	0	0	0	0
			Sesame seed	0.01	0	0.01	0.02	1.313	0.01313		61.4923	12.9177	25.59	0.00807394	0.00169609	0.00335997	0.00807394	6.78438e-05	1.12751e-05
			Palm kernels	0	0	0	0	1.313	0		56.142	28.9894	14.8685	0	0	0	0	0	0
			Olives (including preserved)	0.35	1	0.01	0.11	1.313	0.45955		89.1721	3.20831	7.61958	0.40979	0.0147438	0.0350158	0.40979	0.000589751	0.000117503
			Coconuts (including copra)	0.03	0	0	0.03	1.313	0.03939		61.4923	12.9177	25.59	0.0242218	0	0.0100799	0.0242218	0	3.38252e-05
	Beverages		Coffee	2.43	5	0.39	0	16.477	40.0391	93.3319	53.6	0	46.4	21.461	0	18.5781	21.461	0	0.0623428	66.4781	0.03912	0.0873688
			Wine	12.9	24	0	0	1.585	20.4465		79.6583	3.35563	17.7687	16.2873	0.686109	3.63309	16.2873	0.0274443	0.0121916
			Beer	17.86	24	0.25	0	1.109	19.8067		95	0	5	18.8164	0	0.990337	18.8164	0	0.00332328
			Beverages, fermented	0.06	0	0	0	1.347	0.08082		82	3	15	0.0662724	0.0024246	0.012123	0.0662724	9.6984e-05	4.06812e-05
			Beverages, alcoholic	3.95	32	0	0	1.347	5.32065		82	3	15	4.36293	0.15962	0.798098	4.36293	0.00638478	0.00267818
			Tea (including mate)	0.63	1	0.17	0	12.124	7.63812		71.8	1.7	26.5	5.48417	0.129848	2.0241	5.48417	0.00519392	0.00679229
	Other		Sugar cane	0	0	0	0	2.672	0	84.1156	74.1	1.1	24.8	0	0	0	0	0	0	39.2831	1.01413	0.0655246
			Sugar (non-centrifugal)	0	0	0	0	0.97	0		59.6	16.5	24	0	0	0	0	0	0
			Sugar beet	0	0	0	0	1.536	0		59.6	16.5	24	0	0	0	0	0	0
			Sugar (raw equivalent)	37.53	361	0	0	0.97	36.4041		30.4914	47.2261	22.2824	11.1001	17.1923	8.11172	11.1001	0.68769	0.0272205
			Sweeteners, other	0.41	4	0	0	0.97	0.3977		59.6	16.5	24	0.237029	0.0656205	0.095448	0.237029	0.00262482	0.000320295
			Honey	0.59	5	0.01	0	0.97	0.5723		59.6	16.5	24	0.341091	0.0944295	0.137352	0.341091	0.00377718	0.000460913
			Cocoa beans	0	45	0.49	4.13	18.681	0		59.6	16.5	24	0	0	0	0	0	0
			Pepper	0.08	1	0.02	0.01	12.124	0.96992		59.6	16.5	24	0.578072	0.160037	0.232781	0.578072	0.00640147	0.000781144
			Pimento	0.08	1	0.03	0.04	12.124	0.96992		59.6	16.5	24	0.578072	0.160037	0.232781	0.578072	0.00640147	0.000781144
			Cloves	0	0	0	0	12.124	0		59.6	16.5	24	0	0	0	0	0	0
			Spices, other	0.21	2	0.08	0.08	12.124	2.54604		59.6	16.5	24	1.51744	0.420097	0.61105	1.51744	0.0168039	0.0020505
			Infant food	0.26	3	0.11	0.02	2.781	0.72306		24.6	56.4	19	0.177873	0.407806	0.137381	0.177873	0.0163122	0.000461011
			Miscellaneous	6.07	7	0.2	0.08	6.84227	41.5326		59.6	16.5	24	24.7534	6.85288	9.96782	24.7534	0.274115	0.0334491
Germany	Grain products (non-rice)		Wheat	86.28	676	21.9	2.68	1.4	120.792	149.996	57.9	1.8	40.3	69.9386	2.17426	48.6792	69.9386	0.0869702	0.163353	90.8416	0.108235	0.189445	83517000	8.05714e+10	3.40845e+09	1.69168e+08
			Barley	0.29	2	0.06	0.01	1.313	0.38077		54.569	1.91155	43.5195	0.207782	0.00727862	0.165709	0.207782	0.000291145	0.000556071
			Maize	11.17	79	1.82	0.26	0.988	11.036		71.9	2.05597	26.1	7.93486	0.226896	2.88039	7.93486	0.00907586	0.00966572
			Millet	0.12	1	0.03	0.01	1.313	0.15756		61.8	1.8	36.4	0.0973721	0.00283608	0.0573518	0.0973721	0.000113443	0.000192456
			Rye	10.98	87	2.2	0.31	1.4	15.372		73.3007	1.65211	25.0472	11.2678	0.253963	3.85026	11.2678	0.0101585	0.0129203
			Oats	1.2	9	0.34	0.17	1.575	1.89		61.8	1.8	36.4	1.16802	0.03402	0.68796	1.16802	0.0013608	0.00230859
			Sorghum	0	0	0	0	1.313	0		61.8	1.8	36.4	0	0	0	0	0	0
			Cereals, other	0.28	3	0.08	0.01	1.313	0.36764		61.8	1.8	36.4	0.227202	0.00661752	0.133821	0.227202	0.000264701	0.000449064
	Rice		Rice (milled equivalent)	4.7	34	0.61	0.08	3.839	18.0433	18.0433	22.2	71.8	6	4.00561	12.9551	1.0826	4.00561	0.518204	0.00363288	4.00561	0.518204	0.00363288
	Fruit		Oranges, mandarines	9.67	12	0.2	0.04	0.317	3.06539	51.0556	56.9055	1.22138	41.8731	1.74437	0.03744	1.28358	1.74437	0.0014976	0.0043073	35.7778	0.049158	0.0471441
			Lemons, limes	2.05	1	0.02	0.02	0.317	0.64985		56.3759	0	43.6241	0.366359	0	0.283491	0.366359	0	0.000951312
			Grapefruit	0.63	1	0.01	0	0.317	0.19971		68.8513	2.47131	28.6774	0.137503	0.00493545	0.0572717	0.137503	0.000197418	0.000192187
			Citrus, other	0.37	1	0.01	0	0.317	0.11729		68.8513	2.47131	28.6774	0.0807557	0.0028986	0.0336357	0.0807557	0.000115944	0.000112872
			Bananas	11.57	19	0.25	0.03	0.678	7.84446		79.4125	3.10136	17.4861	6.22948	0.243285	1.37169	6.22948	0.00973138	0.00460299
			Plantains	0.06	0	0	0	0.6632	0.039792		68.8513	2.47131	28.6774	0.0273973	0.000983382	0.0114113	0.0273973	3.93353e-05	3.8293e-05
			Apples	19.01	26	0.15	0.21	0.357	6.78657		72.4477	2.06109	25.4912	4.91672	0.139878	1.72998	4.91672	0.0055951	0.00580529
			Pineapples	2.61	4	0.02	0.01	0.6632	1.73095		68.8513	2.47131	28.6774	1.19178	0.0427771	0.496392	1.19178	0.00171108	0.00166575
			Dates	0.19	1	0.01	0	0.6632	0.126008		68.8513	2.47131	28.6774	0.0867581	0.00311404	0.0361358	0.0867581	0.000124562	0.000121261
			Grapes (excluding wine)	14.08	25	0.25	0.09	1.214	17.0931		68.8513	2.47131	28.6774	11.7688	0.422423	4.90187	11.7688	0.0168969	0.0164492
			Fruits, other	17.87	35	0.47	0.57	0.75	13.4025		68.8513	2.47131	28.6774	9.22779	0.331217	3.84349	9.22779	0.0132487	0.0128976
	Vegetables		Cassava	0	0	0	0	0.987	0	83.1478	83.6105	0.362596	16.0269	0	0	0	0	0	0	50.9649	0.0894623	0.100491
			Potatoes	58.73	109	2.47	0.16	0.37	21.7301		59.711	1.6649	38.6241	12.9753	0.361785	8.39306	12.9753	0.0144714	0.0281646
			Sweet potatoes	0	0	0	0	0.365	0		65.672	2.57696	31.751	0	0	0	0	0	0
			Yams	0	0	0	0	0.365	0		65.672	2.57696	31.751	0	0	0	0	0	0
			Roots, other	0	0	0	0	0.365	0		65.672	2.57696	31.751	0	0	0	0	0	0
			Tomatoes	13.99	12	0.57	0.13	1.427	19.9637		53.5199	4.20609	42.274	10.6846	0.839692	8.43946	10.6846	0.0335877	0.0283203
			Onions	6.17	7	0.2	0.03	0.395	2.43715		71.3251	1.22109	27.4538	1.7383	0.0297598	0.669091	1.7383	0.00119039	0.00224527
			Vegetables, other	69.63	54	2.55	0.44	0.455	31.6816		65.672	2.57696	31.751	20.806	0.816424	10.0592	20.806	0.032657	0.0337559
			Aquatic plants	0	0	0	0	0	0		65.672	2.57696	31.751	0	0	0	0	0	0
			Beans	0.1	1	0.06	0	1.61	0.161		75.1226	5.04344	19.834	0.120947	0.00811994	0.0319327	0.120947	0.000324798	0.000107157
			Peas	0.38	4	0.24	0.01	0.896	0.34048		66.4257	5.15877	28.4155	0.226166	0.0175646	0.0967491	0.226166	0.000702584	0.000324662
			Pulses, other	0.32	3	0.2	0.01	1.61	0.5152		65.672	2.57696	31.751	0.338342	0.0132765	0.163581	0.338342	0.000531061	0.00054893
			Nuts	3.64	55	1.47	5.07	0.278	1.01192		62.5618	3.79852	33.6397	0.633076	0.0384379	0.340406	0.633076	0.00153752	0.0011423
			Soybeans	0.97	8	0.93	0.44	1.8925	1.83573		63.3478	1.20151	35.4507	1.16289	0.0220564	0.650777	1.16289	0.000882254	0.00218382
			Groundnuts (shelled equivalents)	1.39	21	0.94	1.65	2.497	3.47083		65.672	2.57696	31.751	2.27936	0.089442	1.10202	2.27936	0.00357768	0.00369807
	Meat	Ruminant	Bovine meat	14.79	43	5.3	2.31	42.8	633.012	653.032	10.5	73	16.5	66.4663	462.099	104.447	66.4663	18.484	0.350493	70.5304	18.9324	0.366415
			Mutton and goat meat	0.82	5	0.28	0.45	24.415	20.0203		20.3	56	23.7	4.06412	11.2114	4.74481	4.06412	0.448455	0.0159222
		Non-ruminant	Pig meat	43.2	200	11.89	16.54	7.282	314.582	482.583	47.5051	28.439	24.0559	149.443	89.4642	75.6756	149.443	3.57857	0.253945	237.401	4.33	0.459504
			Poultry meat	18.15	67	7.43	3.92	6.092	110.57		53.86	5.83151	40.3085	59.5529	6.44789	44.569	59.5529	0.257916	0.14956
			Meat, other	1.79	5	0.98	0.13	6.687	11.9697		49.4604	21.4829	29.0567	5.92028	2.57144	3.47801	5.92028	0.102858	0.0116712
			Offals, edible	1.69	6	0.92	0.17	26.9	45.461		49.4604	21.4829	29.0567	22.4852	9.76633	13.2095	22.4852	0.390653	0.0443271
	Seafood		Freshwater fish	4.39	8	1.2	0.28	4.005	17.5819	38.3643	49.4604	21.4829	29.0567	8.69611	3.77711	5.10873	8.69611	0.151084	0.0171434	41.5237	0.240414	0.028229
			Demersal fish	3.93	20	1.82	1.37	4.005	15.7397		78.6427	5.32556	16.0317	12.3781	0.838225	2.52333	12.3781	0.033529	0.00846756
			Pelagic fish	2.47	7	0.78	0.37	4.005	9.89235		91.6865	7.21239	1.10113	9.06995	0.713475	0.108928	9.06995	0.028539	0.00036553
			Marine fish, other	0.36	1	0.13	0.03	4.005	1.4418		89.095	4.66193	6.24304	1.28457	0.0672157	0.0900122	1.28457	0.00268863	0.000302054
			Crustaceans	0.88	1	0.22	0.01	7.3405	6.45964		89.095	4.66193	6.24304	5.75522	0.301144	0.403278	5.75522	0.0120458	0.00135328
			Cephalopods	0.26	1	0.1	0.01	7.3405	1.90853		89.095	4.66193	6.24304	1.70041	0.0889744	0.11915	1.70041	0.00355897	0.000399833
			Molluscs, other	0.38	0	0.03	0	7.3405	2.78939		90.3737	7.81574	1.81055	2.52088	0.218011	0.0505032	2.52088	0.00872046	0.000169474
			Aquatic animals, others	0.02	0	0	0	6.6476	0.132952		89.095	4.66193	6.24304	0.118454	0.00619813	0.00830025	0.118454	0.000247925	2.78532e-05
	Dairy		Cream	6.71	36	0.5	3.55	2.781	18.6605	651.424	24.1	56.7	19.2	4.49718	10.5805	3.58282	4.49718	0.42322	0.0120229	145.91	15.2423	0.417643
			Butter, ghee	6.12	120	0.15	13.59	2.781	17.0197		24.1	56.7	19.2	4.10175	9.65018	3.26779	4.10175	0.386007	0.0109657
			Milk (excluding butter) *includes cheese	171.04	383	28.11	19.86	3.6	615.744		22.3	58.6	19.1	137.311	360.826	117.607	137.311	14.433	0.394655
	Eggs		Eggs	13.21	52	4.18	3.63	4.507	59.5375	59.5375	41.5	6.5	52	24.7081	3.86994	30.9595	24.7081	0.154797	0.103891	24.7081	0.154797	0.103891
	Oils		Oilcrops, other	0.11	2	0.05	0.13	1.313	0.14443	77.2043	61.4	13	25.6	0.08868	0.0187759	0.0369741	0.08868	0.000751036	0.000124074	49.6702	0.301997	0.066953
			Soybean oil	5.09	123	0	13.94	6.117	31.1355		61.4	13	25.6	19.1172	4.04762	7.9707	19.1172	0.161905	0.0267473
			Groundnut oil	0.02	0	0	0.04	5.752	0.11504		61.4	13	25.6	0.0706346	0.0149552	0.0294502	0.0706346	0.000598208	9.88263e-05
			Sunflowerseed oil	4.02	100	0	11.29	3.607	14.5001		61.4	13	25.6	8.90309	1.88502	3.71204	8.90309	0.0754007	0.0124565
			Rape and mustard oil	5.15	134	0.01	15.1	3.828	19.7142		65.1	3.3	31.6	12.8339	0.650569	6.22969	12.8339	0.0260227	0.020905
			Cottonseed oil	0	0	0	0	5.752	0		61.4	13	25.6	0	0	0	0	0	0
			Palmkernel oil	0	0	0	0	5.752	0		56.142	28.9894	14.8685	0	0	0	0	0	0
			Sesame seed oil	0	2	0	0.24	5.752	0		61.4	13	25.6	0	0	0	0	0	0
			Palm oil	0	41	0.03	4.65	7.605	0		61.4923	12.9177	25.59	0	0	0	0	0	0
			Coconut oil	0	30	0.02	3.35	5.752	0		61.4	13	25.6	0	0	0	0	0	0
			Olive Oil	0.75	18	0	2.06	5.944	4.458		89.1721	3.20831	7.61958	3.97529	0.143026	0.339681	3.97529	0.00572106	0.00113987
			Rice bran oil	0	0	0	0	5.752	0		61.4	13	25.6	0	0	0	0	0	0
			Maize germ oil	0.15	4	0	0.42	5.752	0.8628		61.4	13	25.6	0.529759	0.112164	0.220877	0.529759	0.00448656	0.000741197
			Oilcrops oil, other	0.79	16	0	1.88	5.752	4.54408		61.4	13	25.6	2.79007	0.59073	1.16328	2.79007	0.0236292	0.00390364
			Fats, animals, raw	0.06	130	0.01	14.43	6.733	0.40398		61.4	13	25.6	0.248044	0.0525174	0.103419	0.248044	0.0021007	0.000347043
			Fish, body oil	0	0	0	0	6.733	0		61.4	13	25.6	0	0	0	0	0	0
			Fish, liver oil	0	0	0	0	6.733	0		61.4	13	25.6	0	0	0	0	0	0
			Sunflower seed	0	0	0	0	1.313	0		61.4	13	25.6	0	0	0	0	0	0
			Rape and mustardseed	0	4	0	0	1.313	0		65.1	3.3	31.6	0	0	0	0	0	0
			Sesame seed	0	0	0	0	1.313	0		61.4923	12.9177	25.59	0	0	0	0	0	0
			Palm kernels	0	0	0	0	1.313	0		56.142	28.9894	14.8685	0	0	0	0	0	0
			Olives (including preserved)	0.82	2	0.02	0.25	1.313	1.07666		89.1721	3.20831	7.61958	0.96008	0.0345426	0.082037	0.96008	0.0013817	0.000275292
			Coconuts (including copra)	0.19	3	0.03	0.26	1.313	0.24947		61.4923	12.9177	25.59	0.153405	0	0.0638393	0.153405	0	0.000214226
	Beverages		Coffee	6.04	7	0.94	0	16.477	99.5211	253.761	53.6	0	46.4	53.3433	0	46.1778	53.3433	0	0.154959	192.352	0.0604802	0.201839
			Wine	20.24	38	0	0	1.585	32.0804		79.6583	3.35563	17.7687	25.5547	1.0765	5.70028	25.5547	0.04306	0.0191285
			Beer	95.31	128	1.31	0	1.109	105.699		95	0	5	100.414	0	5.28494	100.414	0	0.0177347
			Beverages, fermented	0.13	0	0	0	1.347	0.17511		82	3	15	0.14359	0.0052533	0.0262665	0.14359	0.000210132	8.81426e-05
			Beverages, alcoholic	8.76	71	0	0	1.347	11.7997		82	3	15	9.67577	0.353992	1.76996	9.67577	0.0141597	0.00593946
			Tea (including mate)	0.37	0	0.1	0	12.124	4.48588		71.8	1.7	26.5	3.22086	0.07626	1.18876	3.22086	0.0030504	0.00398912
	Other		Sugar cane	0	0	0	0	2.672	0	52.6556	74.1	1.1	24.8	0	0	0	0	0	0	21.0458	0.783982	0.0403604
			Sugar (non-centrifugal)	0	0	0	0	0.97	0		59.6	16.5	24	0	0	0	0	0	0
			Sugar beet	0	0	0	0	1.536	0		59.6	16.5	24	0	0	0	0	0	0
			Sugar (raw equivalent)	36.61	357	0	0	0.97	35.5117		30.4914	47.2261	22.2824	10.828	16.7708	7.91287	10.828	0.670832	0.0265532
			Sweeteners, other	6.52	64	0	0	0.97	6.3244		59.6	16.5	24	3.76934	1.04353	1.51786	3.76934	0.041741	0.00509348
			Honey	1.03	8	0.01	0	0.97	0.9991		59.6	16.5	24	0.595464	0.164852	0.239784	0.595464	0.00659406	0.000804644
			Cocoa beans	0	20	0.29	1.84	18.681	0		59.6	16.5	24	0	0	0	0	0	0
			Pepper	0.19	1	0.06	0.01	12.124	2.30356		59.6	16.5	24	1.37292	0.380087	0.552854	1.37292	0.0152035	0.00185522
			Pimento	0.19	2	0.06	0.09	12.124	2.30356		59.6	16.5	24	1.37292	0.380087	0.552854	1.37292	0.0152035	0.00185522
			Cloves	0.01	0	0	0	12.124	0.12124		59.6	16.5	24	0.072259	0.0200046	0.0290976	0.072259	0.000800184	9.7643e-05
			Spices, other	0.42	4	0.13	0.15	12.124	5.09208		59.6	16.5	24	3.03488	0.840193	1.2221	3.03488	0.0336077	0.004101
			Infant food	0	0	0	0	2.781	0		24.6	56.4	19	0	0	0	0	0	0
			Miscellaneous	0	0	0	0	6.84227	0		59.6	16.5	24	0	0	0	0	0	0
Greece	Grain products (non-rice)		Wheat	126.74	885	28.33	3.6	1.4	177.436	182.726	57.9	1.8	40.3	102.735	3.19385	71.5067	102.735	0.127754	0.239955	106.201	0.131718	0.245748	10473000	1.18735e+10	5.18705e+08	2.49053e+07
			Barley	0.16	4	0.11	0.02	1.313	0.21008		54.569	1.91155	43.5195	0.114638	0.00401579	0.0914257	0.114638	0.000160632	0.000306798
			Maize	1.67	12	0.31	0.1	0.988	1.64996		71.9	2.05597	26.1	1.18632	0.0339227	0.43064	1.18632	0.00135691	0.0014451
			Millet	0	0	0	0	1.313	0		61.8	1.8	36.4	0	0	0	0	0	0
			Rye	0.28	2	0.05	0.01	1.4	0.392		73.3007	1.65211	25.0472	0.287339	0.00647629	0.0981851	0.287339	0.000259052	0.00032948
			Oats	0.47	5	0.21	0.08	1.575	0.74025		61.8	1.8	36.4	0.457474	0.0133245	0.269451	0.457474	0.00053298	0.000904198
			Sorghum	0	0	0	0	1.313	0		61.8	1.8	36.4	0	0	0	0	0	0
			Cereals, other	1.75	17	0.48	0.05	1.313	2.29775		61.8	1.8	36.4	1.42001	0.0413595	0.836381	1.42001	0.00165438	0.00280665
	Rice		Rice (milled equivalent)	4.79	30	0.58	0.05	3.839	18.3888	18.3888	22.2	71.8	6	4.08232	13.2032	1.10333	4.08232	0.528127	0.00370244	4.08232	0.528127	0.00370244
	Fruit		Oranges, mandarines	23.95	23	0.42	0.08	0.317	7.59215	82.7133	56.9055	1.22138	41.8731	4.32035	0.0927289	3.17907	4.32035	0.00370916	0.010668	56.8427	0.077944	0.0802754
			Lemons, limes	6.73	3	0.06	0.05	0.317	2.13341		56.3759	0	43.6241	1.20273	0	0.93068	1.20273	0	0.00312309
			Grapefruit	0.7	0	0.01	0	0.317	0.2219		68.8513	2.47131	28.6774	0.152781	0.00548383	0.0636352	0.152781	0.000219353	0.000213541
			Citrus, other	0	0	0	0	0.317	0		68.8513	2.47131	28.6774	0	0	0	0	0	0
			Bananas	13.97	23	0.31	0.04	0.678	9.47166		79.4125	3.10136	17.4861	7.52168	0.29375	1.65623	7.52168	0.01175	0.00555781
			Plantains	0.33	1	0.01	0	0.6632	0.218856		68.8513	2.47131	28.6774	0.150685	0.0054086	0.0627622	0.150685	0.000216344	0.000210612
			Apples	5.16	8	0.04	0.06	0.357	1.84212		72.4477	2.06109	25.4912	1.33457	0.0379678	0.469578	1.33457	0.00151871	0.00157576
			Pineapples	1.53	2	0.01	0	0.6632	1.0147		68.8513	2.47131	28.6774	0.698631	0.0250762	0.290989	0.698631	0.00100305	0.000976472
			Dates	0.09	1	0	0	0.6632	0.059688		68.8513	2.47131	28.6774	0.0410959	0.00147507	0.017117	0.0410959	5.90029e-05	5.74395e-05
			Grapes (excluding wine)	23.99	35	0.34	0.12	1.214	29.1239		68.8513	2.47131	28.6774	20.0521	0.71974	8.35197	20.0521	0.0287896	0.0280267
			Fruits, other	41.38	55	0.85	0.38	0.75	31.035		68.8513	2.47131	28.6774	21.368	0.76697	8.90004	21.368	0.0306788	0.0298659
	Vegetables		Cassava	0	0	0	0	0.987	0	157.114	83.6105	0.362596	16.0269	0	0	0	0	0	0	92.8355	0.209161	0.198154
			Potatoes	55.44	95	2.17	0.12	0.37	20.5128		59.711	1.6649	38.6241	12.2484	0.341518	7.92289	12.2484	0.0136607	0.0265869
			Sweet potatoes	0.33	1	0.01	0	0.365	0.12045		65.672	2.57696	31.751	0.0791019	0.00310395	0.0382441	0.0791019	0.000124158	0.000128336
			Yams	0	0	0	0	0.365	0		65.672	2.57696	31.751	0	0	0	0	0	0
			Roots, other	0	0	0	0	0.365	0		65.672	2.57696	31.751	0	0	0	0	0	0
			Tomatoes	55.42	27	1.37	0.3	1.427	79.0843		53.5199	4.20609	42.274	42.3259	3.32636	33.4321	42.3259	0.133054	0.112188
			Onions	11.32	12	0.37	0.06	0.395	4.4714		71.3251	1.22109	27.4538	3.18923	0.0545999	1.22757	3.18923	0.002184	0.00411936
			Vegetables, other	88.15	62	3.27	0.53	0.455	40.1083		65.672	2.57696	31.751	26.3399	1.03357	12.7348	26.3399	0.041343	0.0427342
			Aquatic plants	0	0	0	0	0	0		65.672	2.57696	31.751	0	0	0	0	0	0
			Beans	2.33	21	1.35	0.1	1.61	3.7513		75.1226	5.04344	19.834	2.81807	0.189195	0.744033	2.81807	0.00756778	0.00249675
			Peas	0.1	1	0.06	0	0.896	0.0896		66.4257	5.15877	28.4155	0.0595174	0.00462226	0.0254603	0.0595174	0.00018489	8.54372e-05
			Pulses, other	2.26	21	1.38	0.13	1.61	3.6386		65.672	2.57696	31.751	2.38954	0.0937654	1.15529	2.38954	0.00375062	0.00387682
			Nuts	13.56	76	2.01	6.21	0.278	3.76968		62.5618	3.79852	33.6397	2.35838	0.143192	1.26811	2.35838	0.00572767	0.00425539
			Soybeans	0.05	0	0.01	0	1.8925	0.094625		63.3478	1.20151	35.4507	0.0599429	0.00113693	0.0335452	0.0599429	4.5477e-05	0.000112568
			Groundnuts (shelled equivalents)	0.59	6	0.3	0.55	2.497	1.47323		65.672	2.57696	31.751	0.9675	0.0379646	0.467766	0.9675	0.00151858	0.00156968
	Meat	Ruminant	Bovine meat	15.68	45	5.6	2.4	42.8	671.104	833.22	10.5	73	16.5	70.4659	489.906	110.732	70.4659	19.5962	0.371584	103.375	23.2276	0.500515
			Mutton and goat meat	6.64	38	2.43	3.02	24.415	162.116		20.3	56	23.7	32.9095	90.7847	38.4214	32.9095	3.63139	0.128931
		Non-ruminant	Pig meat	29.09	122	6.98	10.18	7.282	211.833	426.135	47.5051	28.439	24.0559	100.632	60.2434	50.9584	100.632	2.40974	0.171001	211.989	3.4881	0.425985
			Poultry meat	20.01	69	8.21	3.77	6.092	121.901		53.86	5.83151	40.3085	65.6558	7.10867	49.1364	65.6558	0.284347	0.164887
			Meat, other	1.79	4	0.61	0.11	6.687	11.9697		49.4604	21.4829	29.0567	5.92028	2.57144	3.47801	5.92028	0.102858	0.0116712
			Offals, edible	2.99	10	1.51	0.34	26.9	80.431		49.4604	21.4829	29.0567	39.7815	17.2789	23.3706	39.7815	0.691156	0.0784248
	Seafood		Freshwater fish	1.98	3	0.49	0.11	4.005	7.9299	90.067	49.4604	21.4829	29.0567	3.92216	1.70357	2.30417	3.92216	0.0681429	0.0077321	81.8433	0.266706	0.0318323
			Demersal fish	6.77	8	1.54	0.18	4.005	27.1138		78.6427	5.32556	16.0317	21.3231	1.44396	4.34681	21.3231	0.0577586	0.0145866
			Pelagic fish	4.37	11	1.49	0.53	4.005	17.5019		91.6865	7.21239	1.10113	16.0468	1.2623	0.192718	16.0468	0.050492	0.000646706
			Marine fish, other	0.5	1	0.16	0.04	4.005	2.0025		89.095	4.66193	6.24304	1.78413	0.0933552	0.125017	1.78413	0.00373421	0.00041952
			Crustaceans	1.65	2	0.47	0.02	7.3405	12.1118		89.095	4.66193	6.24304	10.791	0.564645	0.756146	10.791	0.0225858	0.0025374
			Cephalopods	3.66	8	1.47	0.1	7.3405	26.8662		89.095	4.66193	6.24304	23.9365	1.25249	1.67727	23.9365	0.0500994	0.00562842
			Molluscs, other	0.6	1	0.09	0.01	7.3405	4.4043		90.3737	7.81574	1.81055	3.98033	0.344229	0.0797419	3.98033	0.0137691	0.00026759
			Aquatic animals, others	0.01	0	0	0	6.6476	0.066476		89.095	4.66193	6.24304	0.0592268	0.00309907	0.00415012	0.0592268	0.000123963	1.39266e-05
	Dairy		Cream	1.65	9	0.12	0.87	2.781	4.58865	865.276	24.1	56.7	19.2	1.10586	2.60176	0.881021	1.10586	0.104071	0.00295645	193.083	20.2767	0.554613
			Butter, ghee	0.88	18	0.02	2.02	2.781	2.44728		24.1	56.7	19.2	0.589794	1.38761	0.469878	0.589794	0.0555043	0.00157677
			Milk (excluding butter) *includes cheese	238.4	412	25.86	28.09	3.6	858.24		22.3	58.6	19.1	191.388	502.929	163.924	191.388	20.1171	0.55008
	Eggs		Eggs	9.61	37	2.99	2.62	4.507	43.3123	43.3123	41.5	6.5	52	17.9746	2.8153	22.5224	17.9746	0.112612	0.0755785	17.9746	0.112612	0.0755785
	Oils		Oilcrops, other	0.01	0	0	0.01	1.313	0.01313	179.273	61.4	13	25.6	0.00806182	0.0017069	0.00336128	0.00806182	6.8276e-05	1.12795e-05	140.48	0.502756	0.0879487
			Soybean oil	1.04	25	0	2.84	6.117	6.36168		61.4	13	25.6	3.90607	0.827018	1.62859	3.90607	0.0330807	0.00546507
			Groundnut oil	0.34	8	0	0.94	5.752	1.95568		61.4	13	25.6	1.20079	0.254238	0.500654	1.20079	0.0101695	0.00168005
			Sunflowerseed oil	4.67	113	0	12.78	3.607	16.8447		61.4	13	25.6	10.3426	2.18981	4.31224	10.3426	0.0875924	0.0144706
			Rape and mustard oil	0	0	0	0	3.828	0		65.1	3.3	31.6	0	0	0	0	0	0
			Cottonseed oil	0.37	9	0	1	5.752	2.12824		61.4	13	25.6	1.30674	0.276671	0.544829	1.30674	0.0110668	0.00182829
			Palmkernel oil	0	0	0	0	5.752	0		56.142	28.9894	14.8685	0	0	0	0	0	0
			Sesame seed oil	0.4	10	0	1.1	5.752	2.3008		61.4	13	25.6	1.41269	0.299104	0.589005	1.41269	0.0119642	0.00197653
			Palm oil	0	0	0	0	7.605	0		61.4923	12.9177	25.59	0	0	0	0	0	0
			Coconut oil	0	0	0	0	5.752	0		61.4	13	25.6	0	0	0	0	0	0
			Olive Oil	14.67	355	0	40.2	5.944	87.1985		89.1721	3.20831	7.61958	77.7567	2.7976	6.64416	77.7567	0.111904	0.0222958
			Rice bran oil	0	0	0	0	5.752	0		61.4	13	25.6	0	0	0	0	0	0
			Maize germ oil	1.9	46	0	5.21	5.752	10.9288		61.4	13	25.6	6.71028	1.42074	2.79777	6.71028	0.0568298	0.0093885
			Oilcrops oil, other	3.83	76	0.06	8.51	5.752	22.0302		61.4	13	25.6	13.5265	2.86392	5.63972	13.5265	0.114557	0.0189252
			Fats, animals, raw	0.83	16	0.02	1.78	6.733	5.58839		61.4	13	25.6	3.43127	0.726491	1.43063	3.43127	0.0290596	0.00480076
			Fish, body oil	0	0	0	0	6.733	0		61.4	13	25.6	0	0	0	0	0	0
			Fish, liver oil	0	0	0	0	6.733	0		61.4	13	25.6	0	0	0	0	0	0
			Sunflower seed	0	0	0	0	1.313	0		61.4	13	25.6	0	0	0	0	0	0
			Rape and mustardseed	0	2	0	0	1.313	0		65.1	3.3	31.6	0	0	0	0	0	0
			Sesame seed	1.16	18	0.56	1.58	1.313	1.52308		61.4923	12.9177	25.59	0.936577	0.196747	0.389756	0.936577	0.00786988	0.00130791
			Palm kernels	0	0	0	0	1.313	0		56.142	28.9894	14.8685	0	0	0	0	0	0
			Olives (including preserved)	16.97	41	0.41	4.13	1.313	22.2816		89.1721	3.20831	7.61958	19.869	0.714863	1.69777	19.869	0.0285945	0.0056972
			Coconuts (including copra)	0.09	1	0.01	0.13	1.313	0.11817		61.4923	12.9177	25.59	0.0726655	0	0.0302397	0.0726655	0	0.000101475
	Beverages		Coffee	3.94	6	0.65	0	16.477	64.9194	152.786	53.6	0	46.4	34.7968	0	30.1226	34.7968	0	0.101083	109.186	0.0553409	0.142417
			Wine	18.02	34	0	0	1.585	28.5617		79.6583	3.35563	17.7687	22.7518	0.958425	5.07505	22.7518	0.038337	0.0170304
			Beer	33.64	45	0.46	0	1.109	37.3068		95	0	5	35.4414	0	1.86534	35.4414	0	0.00625952
			Beverages, fermented	0.4	1	0	0	1.347	0.5388		82	3	15	0.441816	0.016164	0.08082	0.441816	0.00064656	0.000271208
			Beverages, alcoholic	2.52	20	0	0	1.347	3.39444		82	3	15	2.78344	0.101833	0.509166	2.78344	0.00407333	0.00170861
			Tea (including mate)	1.49	1	0.2	0	12.124	18.0648		71.8	1.7	26.5	12.9705	0.307101	4.78716	12.9705	0.012284	0.0160643
	Other		Sugar cane	0	0	0	0	2.672	0	41.4189	74.1	1.1	24.8	0	0	0	0	0	0	15.8348	0.651017	0.0312763
			Sugar (non-centrifugal)	0	0	0	0	0.97	0		59.6	16.5	24	0	0	0	0	0	0
			Sugar beet	0	0	0	0	1.536	0		59.6	16.5	24	0	0	0	0	0	0
			Sugar (raw equivalent)	27.21	265	0	0	0.97	26.3937		30.4914	47.2261	22.2824	8.04782	12.4647	5.88116	8.04782	0.498589	0.0197354
			Sweeteners, other	3.92	7	0	0	0.97	3.8024		59.6	16.5	24	2.26623	0.627396	0.912576	2.26623	0.0250958	0.00306234
			Honey	1.63	13	0.02	0	0.97	1.5811		59.6	16.5	24	0.942336	0.260881	0.379464	0.942336	0.0104353	0.00127337
			Cocoa beans	0	26	0.54	2.31	18.681	0		59.6	16.5	24	0	0	0	0	0	0
			Pepper	0.09	1	0.03	0.01	12.124	1.09116		59.6	16.5	24	0.650331	0.180041	0.261878	0.650331	0.00720166	0.000878787
			Pimento	0.11	1	0.04	0.05	12.124	1.33364		59.6	16.5	24	0.794849	0.220051	0.320074	0.794849	0.00880202	0.00107407
			Cloves	0.01	0	0	0	12.124	0.12124		59.6	16.5	24	0.072259	0.0200046	0.0290976	0.072259	0.000800184	9.7643e-05
			Spices, other	0.31	3	0.1	0.1	12.124	3.75844		59.6	16.5	24	2.24003	0.620143	0.902026	2.24003	0.0248057	0.00302693
			Infant food	1.2	12	0.5	0.1	2.781	3.3372		24.6	56.4	19	0.820951	1.88218	0.634068	0.820951	0.0752872	0.00212774
			Miscellaneous	0	0	0	0	6.84227	0		59.6	16.5	24	0	0	0	0	0	0
Hungary	Grain products (non-rice)		Wheat	109.53	838	26.68	3.69	1.4	153.342	157.063	57.9	1.8	40.3	88.785	2.76016	61.7968	88.785	0.110406	0.207372	91.2275	0.113013	0.211444	9685000	8.26979e+09	2.67613e+08	1.65592e+07
			Barley	0.14	1	0.02	0	1.313	0.18382		54.569	1.91155	43.5195	0.100309	0.00351382	0.0799975	0.100309	0.000140553	0.000268448
			Maize	0	0	0	0	0.988	0		71.9	2.05597	26.1	0	0	0	0	0	0
			Millet	0	0	0	0	1.313	0		61.8	1.8	36.4	0	0	0	0	0	0
			Rye	0.97	5	0.14	0.02	1.4	1.358		73.3007	1.65211	25.0472	0.995423	0.0224357	0.340141	0.995423	0.000897428	0.00114141
			Oats	0.7	5	0.2	0.1	1.575	1.1025		61.8	1.8	36.4	0.681345	0.019845	0.40131	0.681345	0.0007938	0.00134668
			Sorghum	0	0	0	0	1.313	0		61.8	1.8	36.4	0	0	0	0	0	0
			Cereals, other	0.82	6	0.2	0.03	1.313	1.07666		61.8	1.8	36.4	0.665376	0.0193799	0.391904	0.665376	0.000775195	0.00131511
	Rice		Rice (milled equivalent)	6.59	42	0.82	0.07	3.839	25.299	25.299	22.2	71.8	6	5.61638	18.1647	1.51794	5.61638	0.726588	0.00509376	5.61638	0.726588	0.00509376
	Fruit		Oranges, mandarines	3.48	5	0.08	0.01	0.317	1.10316	37.7862	56.9055	1.22138	41.8731	0.627759	0.0134738	0.461928	0.627759	0.00053895	0.00155009	26.4308	0.0353788	0.0351372
			Lemons, limes	1.5	1	0.02	0.02	0.317	0.4755		56.3759	0	43.6241	0.268068	0	0.207432	0.268068	0	0.000696082
			Grapefruit	0.38	0	0	0	0.317	0.12046		68.8513	2.47131	28.6774	0.0829382	0.00297694	0.0345448	0.0829382	0.000119077	0.000115922
			Citrus, other	0.24	1	0.01	0	0.317	0.07608		68.8513	2.47131	28.6774	0.0523821	0.00188017	0.0218178	0.0523821	7.52068e-05	7.3214e-05
			Bananas	3.64	6	0.08	0.01	0.678	2.46792		79.4125	3.10136	17.4861	1.95984	0.076539	0.431544	1.95984	0.00306156	0.00144813
			Plantains	1.4	3	0.03	0.01	0.6632	0.92848		68.8513	2.47131	28.6774	0.63927	0.0229456	0.266264	0.63927	0.000917823	0.000893504
			Apples	26.87	35	0.19	0.23	0.357	9.59259		72.4477	2.06109	25.4912	6.94961	0.197712	2.44526	6.94961	0.00790849	0.00820558
			Pineapples	0.62	1	0.01	0	0.6632	0.411184		68.8513	2.47131	28.6774	0.283105	0.0101616	0.117917	0.283105	0.000406465	0.000395694
			Dates	0.09	1	0	0	0.6632	0.059688		68.8513	2.47131	28.6774	0.0410959	0.00147507	0.017117	0.0410959	5.90029e-05	5.74395e-05
			Grapes (excluding wine)	7.4	15	0.16	0.07	1.214	8.9836		68.8513	2.47131	28.6774	6.18532	0.222012	2.57626	6.18532	0.00888049	0.00864518
			Fruits, other	18.09	25	0.34	0.25	0.75	13.5675		68.8513	2.47131	28.6774	9.3414	0.335294	3.89081	9.3414	0.0134118	0.0130564
	Vegetables		Cassava	0	0	0	0	0.987	0	78.9558	83.6105	0.362596	16.0269	0	0	0	0	0	0	47.9356	0.0944536	0.0961708
			Potatoes	39.49	75	1.73	0.1	0.37	14.6113		59.711	1.6649	38.6241	8.72455	0.243264	5.64349	8.72455	0.00973055	0.0189379
			Sweet potatoes	0.07	0	0	0	0.365	0.02555		65.672	2.57696	31.751	0.0167792	0.000658414	0.00811239	0.0167792	2.63366e-05	2.72228e-05
			Yams	0	0	0	0	0.365	0		65.672	2.57696	31.751	0	0	0	0	0	0
			Roots, other	0	0	0	0	0.365	0		65.672	2.57696	31.751	0	0	0	0	0	0
			Tomatoes	18.99	10	0.51	0.11	1.427	27.0987		53.5199	4.20609	42.274	14.5032	1.1398	11.4557	14.5032	0.0455918	0.038442
			Onions	6.4	7	0.22	0.04	0.395	2.528		71.3251	1.22109	27.4538	1.8031	0.0308692	0.694033	1.8031	0.00123477	0.00232897
			Vegetables, other	68.33	56	2.71	0.55	0.455	31.0902		65.672	2.57696	31.751	20.4175	0.801182	9.87144	20.4175	0.0320473	0.0331256
			Aquatic plants	0	0	0	0	0	0		65.672	2.57696	31.751	0	0	0	0	0	0
			Beans	0.66	6	0.38	0.03	1.61	1.0626		75.1226	5.04344	19.834	0.798252	0.0535916	0.210756	0.798252	0.00214366	0.000707235
			Peas	1.13	11	0.7	0.04	0.896	1.01248		66.4257	5.15877	28.4155	0.672547	0.0522315	0.287701	0.672547	0.00208926	0.000965441
			Pulses, other	0.32	3	0.19	0.01	1.61	0.5152		65.672	2.57696	31.751	0.338342	0.0132765	0.163581	0.338342	0.000531061	0.00054893
			Nuts	0.27	2	0.05	0.14	0.278	0.07506		62.5618	3.79852	33.6397	0.0469589	0.00285117	0.0252499	0.0469589	0.000114047	8.47313e-05
			Soybeans	0.02	0	0	0	1.8925	0.03785		63.3478	1.20151	35.4507	0.0239771	0.00045477	0.0134181	0.0239771	1.81908e-05	4.50271e-05
			Groundnuts (shelled equivalents)	0.36	5	0.24	0.45	2.497	0.89892		65.672	2.57696	31.751	0.590339	0.0231648	0.285416	0.590339	0.000926594	0.000957773
	Meat	Ruminant	Bovine meat	4.48	14	1.5	0.72	42.8	191.744	195.406	10.5	73	16.5	20.1331	139.973	31.6378	20.1331	5.59892	0.106167	20.8766	5.68096	0.10908
			Mutton and goat meat	0.15	1	0.05	0.07	24.415	3.66225		20.3	56	23.7	0.743437	2.05086	0.867953	0.743437	0.0820344	0.00291259
		Non-ruminant	Pig meat	53.53	287	15.05	24.66	7.282	389.805	549.2	47.5051	28.439	24.0559	185.177	110.857	93.7712	185.177	4.43428	0.314668	270.838	4.83295	0.52865
			Poultry meat	25.46	107	9.84	7.17	6.092	155.102		53.86	5.83151	40.3085	83.5381	9.04481	62.5194	83.5381	0.361793	0.209797
			Meat, other	0.32	1	0.2	0.02	6.687	2.13984		49.4604	21.4829	29.0567	1.05837	0.459699	0.621767	1.05837	0.018388	0.00208647
			Offals, edible	0.08	0	0.04	0.01	26.9	2.152		49.4604	21.4829	29.0567	1.06439	0.462312	0.6253	1.06439	0.0184925	0.00209832
	Seafood		Freshwater fish	3.11	6	0.87	0.22	4.005	12.4555	14.0566	49.4604	21.4829	29.0567	6.16057	2.67581	3.61917	6.16057	0.107032	0.0121449	18.307	0.14157	0.0156573
			Demersal fish	1.28	3	0.33	0.14	4.005	5.1264		78.6427	5.32556	16.0317	4.03154	0.27301	0.821849	4.03154	0.0109204	0.00275788
			Pelagic fish	1.41	4	0.48	0.21	4.005	5.64705		91.6865	7.21239	1.10113	5.17758	0.407287	0.0621815	5.17758	0.0162915	0.000208663
			Marine fish, other	0.18	1	0.08	0.02	4.005	0.7209		89.095	4.66193	6.24304	0.642286	0.0336079	0.0450061	0.642286	0.00134431	0.000151027
			Crustaceans	0.16	0	0.04	0	7.3405	1.17448		89.095	4.66193	6.24304	1.0464	0.0547535	0.0733233	1.0464	0.00219014	0.000246051
			Cephalopods	0.05	0	0.02	0	7.3405	0.367025		89.095	4.66193	6.24304	0.327001	0.0171105	0.0229135	0.327001	0.000684418	7.6891e-05
			Molluscs, other	0.13	0	0.01	0	7.3405	0.954265		90.3737	7.81574	1.81055	0.862405	0.0745829	0.0172774	0.862405	0.00298331	5.79779e-05
			Aquatic animals, others	0.01	0	0	0	6.6476	0.066476		89.095	4.66193	6.24304	0.0592268	0.00309907	0.00415012	0.0592268	0.000123963	1.39266e-05
	Dairy		Cream	8.07	43	0.6	4.27	2.781	22.4427	632.342	24.1	56.7	19.2	5.40868	12.725	4.30899	5.40868	0.509	0.0144597	141.47	14.8028	0.405379
			Butter, ghee	1.07	21	0.03	2.38	2.781	2.97567		24.1	56.7	19.2	0.717136	1.6872	0.571329	0.717136	0.0674882	0.00191721
			Milk (excluding butter) *includes cheese	168.59	258	17.67	16.13	3.6	606.924		22.3	58.6	19.1	135.344	355.657	115.922	135.344	14.2263	0.389002
	Eggs		Eggs	13.79	53	4.29	3.75	4.507	62.1515	62.1515	41.5	6.5	52	25.7929	4.03985	32.3188	25.7929	0.161594	0.108452	25.7929	0.161594	0.108452
	Oils		Oilcrops, other	0.04	1	0.02	0.05	1.313	0.05252	54.044	61.4	13	25.6	0.0322473	0.0068276	0.0134451	0.0322473	0.000273104	4.51179e-05	33.9877	0.236904	0.0473431
			Soybean oil	0.57	14	0	1.56	6.117	3.48669		61.4	13	25.6	2.14083	0.45327	0.892593	2.14083	0.0181308	0.00299528
			Groundnut oil	0	0	0	0.01	5.752	0		61.4	13	25.6	0	0	0	0	0	0
			Sunflowerseed oil	6.61	284	0.1	32.02	3.607	23.8423		61.4	13	25.6	14.6392	3.0995	6.10362	14.6392	0.12398	0.020482
			Rape and mustard oil	2.47	60	0	6.77	3.828	9.45516		65.1	3.3	31.6	6.15531	0.31202	2.98783	6.15531	0.0124808	0.0100263
			Cottonseed oil	0	0	0	0	5.752	0		61.4	13	25.6	0	0	0	0	0	0
			Palmkernel oil	0	0	0	0	5.752	0		56.142	28.9894	14.8685	0	0	0	0	0	0
			Sesame seed oil	0	0	0	0.01	5.752	0		61.4	13	25.6	0	0	0	0	0	0
			Palm oil	0	88	0.07	9.95	7.605	0		61.4923	12.9177	25.59	0	0	0	0	0	0
			Coconut oil	0	0	0	0	5.752	0		61.4	13	25.6	0	0	0	0	0	0
			Olive Oil	0.24	6	0	0.66	5.944	1.42656		89.1721	3.20831	7.61958	1.27209	0.0457684	0.108698	1.27209	0.00183074	0.000364758
			Rice bran oil	0	0	0	0	5.752	0		61.4	13	25.6	0	0	0	0	0	0
			Maize germ oil	0.07	2	0	0.18	5.752	0.40264		61.4	13	25.6	0.247221	0.0523432	0.103076	0.247221	0.00209373	0.000345892
			Oilcrops oil, other	0.59	15	0.01	1.64	5.752	3.39368		61.4	13	25.6	2.08372	0.441178	0.868782	2.08372	0.0176471	0.00291538
			Fats, animals, raw	1.7	279	0.13	30.88	6.733	11.4461		61.4	13	25.6	7.02791	1.48799	2.9302	7.02791	0.0595197	0.00983289
			Fish, body oil	0	0	0	0	6.733	0		61.4	13	25.6	0	0	0	0	0	0
			Fish, liver oil	0	0	0	0.01	6.733	0		61.4	13	25.6	0	0	0	0	0	0
			Sunflower seed	0	0	0	0	1.313	0		61.4	13	25.6	0	0	0	0	0	0
			Rape and mustardseed	0	3	0	0	1.313	0		65.1	3.3	31.6	0	0	0	0	0	0
			Sesame seed	0.1	2	0.05	0.13	1.313	0.1313		61.4923	12.9177	25.59	0.0807394	0.0169609	0.0335997	0.0807394	0.000678438	0.000112751
			Palm kernels	0	0	0	0	1.313	0		56.142	28.9894	14.8685	0	0	0	0	0	0
			Olives (including preserved)	0.16	0	0	0.05	1.313	0.21008		89.1721	3.20831	7.61958	0.187333	0.00674001	0.0160072	0.187333	0.000269601	5.37155e-05
			Coconuts (including copra)	0.15	3	0.03	0.25	1.313	0.19695		61.4923	12.9177	25.59	0.121109	0	0.0503995	0.121109	0	0.000169126
	Beverages		Coffee	1.63	2	0.29	0	16.477	26.8575	159	53.6	0	46.4	14.3956	0	12.4619	14.3956	0	0.0418184	131.54	0.0715943	0.0872191
			Wine	25.86	49	0	0	1.585	40.9881		79.6583	3.35563	17.7687	32.6504	1.37541	7.28307	32.6504	0.0550163	0.0244398
			Beer	68.98	93	0.94	0	1.109	76.4988		95	0	5	72.6739	0	3.82494	72.6739	0	0.0128354
			Beverages, fermented	2.64	3	0.01	0	1.347	3.55608		82	3	15	2.91599	0.106682	0.533412	2.91599	0.0042673	0.00178997
			Beverages, alcoholic	6.8	55	0	0	1.347	9.1596		82	3	15	7.51087	0.274788	1.37394	7.51087	0.0109915	0.00461054
			Tea (including mate)	0.16	0	0.03	0	12.124	1.93984		71.8	1.7	26.5	1.39281	0.0329773	0.514058	1.39281	0.00131909	0.00172503
	Other		Sugar cane	0	0	0	0	2.672	0	76.0696	74.1	1.1	24.8	0	0	0	0	0	0	39.8544	0.733932	0.0601483
			Sugar (non-centrifugal)	0	0	0	0	0.97	0		59.6	16.5	24	0	0	0	0	0	0
			Sugar beet	0	0	0	0	1.536	0		59.6	16.5	24	0	0	0	0	0	0
			Sugar (raw equivalent)	19.04	186	0	0	0.97	18.4688		30.4914	47.2261	22.2824	5.6314	8.7221	4.1153	5.6314	0.348884	0.0138097
			Sweeteners, other	21.42	167	0	0	0.97	20.7774		59.6	16.5	24	12.3833	3.42827	4.98658	12.3833	0.137131	0.0167335
			Honey	0.4	3	0	0	0.97	0.388		59.6	16.5	24	0.231248	0.06402	0.09312	0.231248	0.0025608	0.000312483
			Cocoa beans	0	26	0.56	2.27	18.681	0		59.6	16.5	24	0	0	0	0	0	0
			Pepper	0.11	1	0.03	0.01	12.124	1.33364		59.6	16.5	24	0.794849	0.220051	0.320074	0.794849	0.00880202	0.00107407
			Pimento	1.87	1	0.01	0	12.124	22.6719		59.6	16.5	24	13.5124	3.74086	5.44125	13.5124	0.149634	0.0182592
			Cloves	0	0	0	0	12.124	0		59.6	16.5	24	0	0	0	0	0	0
			Spices, other	1	9	0.34	0.39	12.124	12.124		59.6	16.5	24	7.2259	2.00046	2.90976	7.2259	0.0800184	0.0097643
			Infant food	0.11	1	0.05	0.01	2.781	0.30591		24.6	56.4	19	0.0752539	0.172533	0.0581229	0.0752539	0.00690133	0.000195043
			Miscellaneous	0	0	0	0	6.84227	0		59.6	16.5	24	0	0	0	0	0	0
Iceland	Grain products (non-rice)		Wheat	76.42	728	25.44	13.89	1.4	106.988	113.127	57.9	1.8	40.3	61.9461	1.92578	43.1162	61.9461	0.0770314	0.144685	65.8736	0.0813827	0.151741	339000	4.98273e+08	1.91881e+07	940039
			Barley	0	0	0	0	1.313	0		54.569	1.91155	43.5195	0	0	0	0	0	0
			Maize	0	0	0	0	0.988	0		71.9	2.05597	26.1	0	0	0	0	0	0
			Millet	0	0	0	0	1.313	0		61.8	1.8	36.4	0	0	0	0	0	0
			Rye	0.83	7	0.16	0.02	1.4	1.162		73.3007	1.65211	25.0472	0.851754	0.0191976	0.291049	0.851754	0.000767903	0.000976673
			Oats	3.16	34	1.29	0.63	1.575	4.977		61.8	1.8	36.4	3.07579	0.089586	1.81163	3.07579	0.00358344	0.00607929
			Sorghum	0	0	0	0	1.313	0		61.8	1.8	36.4	0	0	0	0	0	0
			Cereals, other	0	0	0	0	1.313	0		61.8	1.8	36.4	0	0	0	0	0	0
	Rice		Rice (milled equivalent)	4.24	42	0.81	0.08	3.839	16.2774	16.2774	22.2	71.8	6	3.61357	11.6871	0.976642	3.61357	0.467486	0.00327732	3.61357	0.467486	0.00327732
	Fruit		Oranges, mandarines	13.87	19	0.3	0.04	0.317	4.39679	55.7293	56.9055	1.22138	41.8731	2.50201	0.0537015	1.84107	2.50201	0.00214806	0.0061781	38.6759	0.0529819	0.0527815
			Lemons, limes	2.59	1	0.02	0.02	0.317	0.82103		56.3759	0	43.6241	0.462863	0	0.358167	0.462863	0	0.0012019
			Grapefruit	0.63	1	0.01	0	0.317	0.19971		68.8513	2.47131	28.6774	0.137503	0.00493545	0.0572717	0.137503	0.000197418	0.000192187
			Citrus, other	0.29	0	0.01	0	0.317	0.09193		68.8513	2.47131	28.6774	0.063295	0.00227187	0.0263632	0.063295	9.08749e-05	8.84669e-05
			Bananas	10.37	17	0.23	0.02	0.678	7.03086		79.4125	3.10136	17.4861	5.58338	0.218052	1.22943	5.58338	0.00872208	0.00412559
			Plantains	10.37	21	0.23	0.08	0.6632	6.87738		68.8513	2.47131	28.6774	4.73517	0.169961	1.97226	4.73517	0.00679845	0.00661831
			Apples	14.85	23	0.12	0.15	0.357	5.30145		72.4477	2.06109	25.4912	3.84078	0.109268	1.3514	3.84078	0.00437072	0.0045349
			Pineapples	3.05	5	0.03	0.02	0.6632	2.02276		68.8513	2.47131	28.6774	1.3927	0.0499886	0.580075	1.3927	0.00199954	0.00194656
			Dates	0.62	4	0.02	0.01	0.6632	0.411184		68.8513	2.47131	28.6774	0.283105	0.0101616	0.117917	0.283105	0.000406465	0.000395694
			Grapes (excluding wine)	5.66	18	0.17	0.06	1.214	6.87124		68.8513	2.47131	28.6774	4.73094	0.169809	1.97049	4.73094	0.00679238	0.0066124
			Fruits, other	28.94	45	0.58	1.17	0.75	21.705		68.8513	2.47131	28.6774	14.9442	0.536397	6.22443	14.9442	0.0214559	0.0208874
	Vegetables		Cassava	0	0	0	0	0.987	0	63.3382	83.6105	0.362596	16.0269	0	0	0	0	0	0	38.9622	0.0713141	0.0758158
			Potatoes	33.76	66	1.45	0.07	0.37	12.4912		59.711	1.6649	38.6241	7.45862	0.207966	4.82462	7.45862	0.00831865	0.01619
			Sweet potatoes	4.78	12	0.09	0.02	0.365	1.7447		65.672	2.57696	31.751	1.14578	0.0449603	0.55396	1.14578	0.00179841	0.00185893
			Yams	0	0	0	0	0.365	0		65.672	2.57696	31.751	0	0	0	0	0	0
			Roots, other	0.01	0	0	0	0.365	0.00365		65.672	2.57696	31.751	0.00239703	9.40592e-05	0.00115891	0.00239703	3.76237e-06	3.88897e-06
			Tomatoes	11.95	10	0.47	0.11	1.427	17.0526		53.5199	4.20609	42.274	9.12657	0.717249	7.20883	9.12657	0.02869	0.0241907
			Onions	5.84	6	0.2	0.03	0.395	2.3068		71.3251	1.22109	27.4538	1.64533	0.0281681	0.633305	1.64533	0.00112673	0.00212518
			Vegetables, other	56.12	48	2.21	0.44	0.455	25.5346		65.672	2.57696	31.751	16.7691	0.658017	8.1075	16.7691	0.0263207	0.0272064
			Aquatic plants	0	0	0	0	0	0		65.672	2.57696	31.751	0	0	0	0	0	0
			Beans	0.53	5	0.33	0.02	1.61	0.8533		75.1226	5.04344	19.834	0.641021	0.0430357	0.169244	0.641021	0.00172143	0.000567931
			Peas	0.02	0	0.01	0	0.896	0.01792		66.4257	5.15877	28.4155	0.0119035	0.000924452	0.00509206	0.0119035	3.69781e-05	1.70874e-05
			Pulses, other	0.15	1	0.1	0.01	1.61	0.2415		65.672	2.57696	31.751	0.158598	0.00622337	0.0766787	0.158598	0.000248935	0.000257311
			Nuts	1.51	18	0.48	1.63	0.278	0.41978		62.5618	3.79852	33.6397	0.262622	0.0159454	0.141213	0.262622	0.000637816	0.000473868
			Soybeans	0.33	1	0.05	0.01	1.8925	0.624525		63.3478	1.20151	35.4507	0.395623	0.00750371	0.221398	0.395623	0.000300148	0.000742947
			Groundnuts (shelled equivalents)	0.82	13	0.6	1.11	2.497	2.04754		65.672	2.57696	31.751	1.34466	0.0527644	0.650115	1.34466	0.00211057	0.00218159
	Meat	Ruminant	Bovine meat	14.89	86	6.14	6.55	42.8	637.292	1174.42	10.5	73	16.5	66.9157	465.223	105.153	66.9157	18.6089	0.352863	175.953	30.6406	0.780044
			Mutton and goat meat	22	141	7.54	12.11	24.415	537.13		20.3	56	23.7	109.037	300.793	127.3	109.037	12.0317	0.427181
		Non-ruminant	Pig meat	20.91	212	5.54	20.86	7.282	152.267	455.361	47.5051	28.439	24.0559	72.3344	43.3032	36.6291	72.3344	1.73213	0.122916	230.517	3.15969	0.489435
			Poultry meat	30.86	107	12.68	5.92	6.092	187.999		53.86	5.83151	40.3085	101.256	10.9632	75.7796	101.256	0.438528	0.254294
			Meat, other	2.73	8	1.4	0.28	6.687	18.2555		49.4604	21.4829	29.0567	9.02925	3.92181	5.30445	9.02925	0.156872	0.0178002
			Offals, edible	3.6	18	1.43	0.27	26.9	96.84		49.4604	21.4829	29.0567	47.8975	20.804	28.1385	47.8975	0.832161	0.0944245
	Seafood		Freshwater fish	10.07	19	2.98	0.68	4.005	40.3304	380.722	49.4604	21.4829	29.0567	19.9476	8.66412	11.7187	19.9476	0.346565	0.0393244	354.937	1.26237	0.115961
			Demersal fish	21.13	25	4.52	0.62	4.005	84.6256		78.6427	5.32556	16.0317	66.5519	4.50679	13.5669	66.5519	0.180272	0.0455266
			Pelagic fish	44.43	123	17.66	5.19	4.005	177.942		91.6865	7.21239	1.10113	163.149	12.8339	1.95938	163.149	0.513355	0.00657509
			Marine fish, other	0	0	0	0	4.005	0		89.095	4.66193	6.24304	0	0	0	0	0	0
			Crustaceans	15.86	23	4.58	0.21	7.3405	116.42		89.095	4.66193	6.24304	103.725	5.42744	7.26817	103.725	0.217097	0.0243898
			Cephalopods	0	0	0	0	7.3405	0		89.095	4.66193	6.24304	0	0	0	0	0	0
			Molluscs, other	0.2	0	0.02	0	7.3405	1.4681		90.3737	7.81574	1.81055	1.32678	0.114743	0.0265806	1.32678	0.00458971	8.91967e-05
			Aquatic animals, others	0.04	0	0	0	6.6476	0.265904		89.095	4.66193	6.24304	0.236907	0.0123963	0.0166005	0.236907	0.000495851	5.57064e-05
	Dairy		Cream	9.74	52	0.72	5.15	2.781	27.0869	787.242	24.1	56.7	19.2	6.52795	15.3583	5.20069	6.52795	0.614332	0.017452	176.352	18.4193	0.504723
			Butter, ghee	6.18	121	0.15	13.72	2.781	17.1866		24.1	56.7	19.2	4.14197	9.74479	3.29982	4.14197	0.389792	0.0110732
			Milk (excluding butter) *includes cheese	206.38	636	35.91	37.62	3.6	742.968		22.3	58.6	19.1	165.682	435.379	141.907	165.682	17.4152	0.476198
	Eggs		Eggs	11.81	46	3.71	3.23	4.507	53.2277	53.2277	41.5	6.5	52	22.0895	3.4598	27.6784	22.0895	0.138392	0.0928805	22.0895	0.138392	0.0928805
	Oils		Oilcrops, other	0	0	0	0	1.313	0	65.7459	61.4	13	25.6	0	0	0	0	0	0	42.277	0.308775	0.0527026
			Soybean oil	5.21	126	0	14.28	6.117	31.8696		61.4	13	25.6	19.5679	4.14304	8.15861	19.5679	0.165722	0.0273779
			Groundnut oil	0.01	0	0	0.04	5.752	0.05752		61.4	13	25.6	0.0353173	0.0074776	0.0147251	0.0353173	0.000299104	4.94132e-05
			Sunflowerseed oil	1.26	31	0	3.46	3.607	4.54482		61.4	13	25.6	2.79052	0.590827	1.16347	2.79052	0.0236331	0.00390427
			Rape and mustard oil	0	0	0	0	3.828	0		65.1	3.3	31.6	0	0	0	0	0	0
			Cottonseed oil	0	0	0	0	5.752	0		61.4	13	25.6	0	0	0	0	0	0
			Palmkernel oil	0	0	0	0	5.752	0		56.142	28.9894	14.8685	0	0	0	0	0	0
			Sesame seed oil	0.02	1	0	0.07	5.752	0.11504		61.4	13	25.6	0.0706346	0.0149552	0.0294502	0.0706346	0.000598208	9.88263e-05
			Palm oil	0	0	0	0	7.605	0		61.4923	12.9177	25.59	0	0	0	0	0	0
			Coconut oil	0.67	16	0	1.83	5.752	3.85384		61.4	13	25.6	2.36626	0.500999	0.986583	2.36626	0.02004	0.00331068
			Olive Oil	0.97	23	0	2.65	5.944	5.76568		89.1721	3.20831	7.61958	5.14138	0.184981	0.439321	5.14138	0.00739923	0.00147423
			Rice bran oil	0	0	0	0	5.752	0		61.4	13	25.6	0	0	0	0	0	0
			Maize germ oil	0.04	1	0	0.12	5.752	0.23008		61.4	13	25.6	0.141269	0.0299104	0.0589005	0.141269	0.00119642	0.000197653
			Oilcrops oil, other	0.87	17	0.02	1.93	5.752	5.00424		61.4	13	25.6	3.0726	0.650551	1.28109	3.0726	0.026022	0.00429894
			Fats, animals, raw	1.45	29	0	3.17	6.733	9.76285		61.4	13	25.6	5.99439	1.26917	2.49929	5.99439	0.0507668	0.00838688
			Fish, body oil	0	0	0	0	6.733	0		61.4	13	25.6	0	0	0	0	0	0
			Fish, liver oil	0.23	6	0	0.64	6.733	1.54859		61.4	13	25.6	0.950834	0.201317	0.396439	0.950834	0.00805267	0.00133033
			Sunflower seed	0.31	3	0.11	0.23	1.313	0.40703		61.4	13	25.6	0.249916	0.0529139	0.1042	0.249916	0.00211656	0.000349663
			Rape and mustardseed	1	12	1	1	1.313	1.313		65.1	3.3	31.6	0.854763	0.043329	0.414908	0.854763	0.00173316	0.00139231
			Sesame seed	0	0	0	0	1.313	0		61.4923	12.9177	25.59	0	0	0	0	0	0
			Palm kernels	0	0	0	0	1.313	0		56.142	28.9894	14.8685	0	0	0	0	0	0
			Olives (including preserved)	0.71	2	0.02	0.24	1.313	0.93223		89.1721	3.20831	7.61958	0.831289	0.0299088	0.071032	0.831289	0.00119635	0.000238362
			Coconuts (including copra)	0.26	3	0.03	0.33	1.313	0.34138		61.4923	12.9177	25.59	0.209922	0	0.0873591	0.209922	0	0.000293151
	Beverages		Coffee	8.8	11	1.54	0	16.477	144.998	263.8	53.6	0	46.4	77.7187	0	67.2789	77.7187	0	0.225768	185.299	0.0369808	0.260858
			Wine	12.81	24	0	0	1.585	20.3038		79.6583	3.35563	17.7687	16.1737	0.681322	3.60774	16.1737	0.0272529	0.0121065
			Beer	78.76	106	1.08	0	1.109	87.3448		95	0	5	82.9776	0	4.36724	82.9776	0	0.0146552
			Beverages, fermented	1.34	2	0	0	1.347	1.80498		82	3	15	1.48008	0.0541494	0.270747	1.48008	0.00216598	0.000908547
			Beverages, alcoholic	1.72	14	0	0	1.347	2.31684		82	3	15	1.89981	0.0695052	0.347526	1.89981	0.00278021	0.00116619
			Tea (including mate)	0.58	0	0.11	0	12.124	7.03192		71.8	1.7	26.5	5.04892	0.119543	1.86346	5.04892	0.00478171	0.00625322
	Other		Sugar cane	0	0	0	0	2.672	0	241.582	74.1	1.1	24.8	0	0	0	0	0	0	135.282	1.96278	0.192758
			Sugar (non-centrifugal)	0	0	0	0	0.97	0		59.6	16.5	24	0	0	0	0	0	0
			Sugar beet	0	0	0	0	1.536	0		59.6	16.5	24	0	0	0	0	0	0
			Sugar (raw equivalent)	29.78	308	0	0	0.97	28.8866		30.4914	47.2261	22.2824	8.80794	13.642	6.43664	8.80794	0.545681	0.0215994
			Sweeteners, other	51.5	59	0	0	0.97	49.955		59.6	16.5	24	29.7732	8.24257	11.9892	29.7732	0.329703	0.0402322
			Honey	0.34	3	0	0	0.97	0.3298		59.6	16.5	24	0.196561	0.054417	0.079152	0.196561	0.00217668	0.000265611
			Cocoa beans	0	57	0.98	5.1	18.681	0		59.6	16.5	24	0	0	0	0	0	0
			Pepper	0.21	2	0.07	0.02	12.124	2.54604		59.6	16.5	24	1.51744	0.420097	0.61105	1.51744	0.0168039	0.0020505
			Pimento	0.07	1	0.02	0.03	12.124	0.84868		59.6	16.5	24	0.505813	0.140032	0.203683	0.505813	0.00560129	0.000683501
			Cloves	0.01	0	0	0.01	12.124	0.12124		59.6	16.5	24	0.072259	0.0200046	0.0290976	0.072259	0.000800184	9.7643e-05
			Spices, other	1.05	10	0.29	0.32	12.124	12.7302		59.6	16.5	24	7.5872	2.10048	3.05525	7.5872	0.0840193	0.0102525
			Infant food	0.3	3	0.12	0.02	2.781	0.8343		24.6	56.4	19	0.205238	0.470545	0.158517	0.205238	0.0188218	0.000531936
			Miscellaneous	21.24	24	0.7	0.29	6.84227	145.33		59.6	16.5	24	86.6166	23.9794	34.8792	86.6166	0.959177	0.117044
Ireland	Grain products (non-rice)		Wheat	105.63	913	25.89	6.77	1.4	147.882	165.545	57.9	1.8	40.3	85.6237	2.66188	59.5964	85.6237	0.106475	0.199988	97.5081	0.120371	0.218232	4882000	6.0325e+09	3.15147e+08	1.27356e+07
			Barley	1.59	13	0.37	0.06	1.313	2.08767		54.569	1.91155	43.5195	1.13922	0.0399069	0.908543	1.13922	0.00159628	0.0030488
			Maize	10.9	87	2.01	0.29	0.988	10.7692		71.9	2.05597	26.1	7.74305	0.221412	2.81076	7.74305	0.00885648	0.00943208
			Millet	0	0	0	0	1.313	0		61.8	1.8	36.4	0	0	0	0	0	0
			Rye	0.2	1	0.04	0.01	1.4	0.28		73.3007	1.65211	25.0472	0.205242	0.00462592	0.0701322	0.205242	0.000185037	0.000235343
			Oats	2.49	16	0.64	0.31	1.575	3.92175		61.8	1.8	36.4	2.42364	0.0705915	1.42752	2.42364	0.00282366	0.00479033
			Sorghum	0	0	0	0	1.313	0		61.8	1.8	36.4	0	0	0	0	0	0
			Cereals, other	0.46	5	0.13	0.02	1.313	0.60398		61.8	1.8	36.4	0.37326	0.0108716	0.219849	0.37326	0.000434866	0.000737747
	Rice		Rice (milled equivalent)	4.21	41	0.81	0.09	3.839	16.1622	16.1622	22.2	71.8	6	3.58801	11.6045	0.969731	3.58801	0.464178	0.00325413	3.58801	0.464178	0.00325413
	Fruit		Oranges, mandarines	20.53	53	0.82	0.09	0.317	6.50801	40.4588	56.9055	1.22138	41.8731	3.70341	0.0794874	2.72511	3.70341	0.0031795	0.00914466	27.9624	0.0376291	0.0387773
			Lemons, limes	2.2	1	0.02	0.02	0.317	0.6974		56.3759	0	43.6241	0.393166	0	0.304234	0.393166	0	0.00102092
			Grapefruit	0.72	1	0.01	0	0.317	0.22824		68.8513	2.47131	28.6774	0.157146	0.00564051	0.0654533	0.157146	0.00022562	0.000219642
			Citrus, other	2.98	2	0.03	0.01	0.317	0.94466		68.8513	2.47131	28.6774	0.65041	0.0233454	0.270904	0.65041	0.000933818	0.000909074
			Bananas	12.07	20	0.26	0.03	0.678	8.18346		79.4125	3.10136	17.4861	6.49869	0.253798	1.43097	6.49869	0.0101519	0.00480191
			Plantains	0	0	0	0	0.6632	0		68.8513	2.47131	28.6774	0	0	0	0	0	0
			Apples	8.27	9	0.04	0.04	0.357	2.95239		72.4477	2.06109	25.4912	2.13894	0.0608515	0.752599	2.13894	0.00243406	0.0025255
			Pineapples	1.73	3	0.02	0.01	0.6632	1.14734		68.8513	2.47131	28.6774	0.789955	0.0283542	0.329026	0.789955	0.00113417	0.00110412
			Dates	0.08	1	0	0	0.6632	0.053056		68.8513	2.47131	28.6774	0.0365297	0.00131118	0.0152151	0.0365297	5.2447e-05	5.10574e-05
			Grapes (excluding wine)	4.05	15	0.16	0.04	1.214	4.9167		68.8513	2.47131	28.6774	3.38521	0.121507	1.40998	3.38521	0.00486027	0.00473149
			Fruits, other	19.77	40	0.47	0.62	0.75	14.8275		68.8513	2.47131	28.6774	10.2089	0.366433	4.25214	10.2089	0.0146573	0.0142689
	Vegetables		Cassava	0	0	0	0	0.987	0	83.8657	83.6105	0.362596	16.0269	0	0	0	0	0	0	52.1293	0.0884964	0.0990738
			Potatoes	68.68	128	2.87	0.15	0.37	25.4116		59.711	1.6649	38.6241	15.1735	0.423078	9.81501	15.1735	0.0169231	0.0329363
			Sweet potatoes	0.04	0	0	0	0.365	0.0146		65.672	2.57696	31.751	0.00958811	0.000376237	0.00463565	0.00958811	1.50495e-05	1.55559e-05
			Yams	0	0	0	0	0.365	0		65.672	2.57696	31.751	0	0	0	0	0	0
			Roots, other	0	0	0	0	0.365	0		65.672	2.57696	31.751	0	0	0	0	0	0
			Tomatoes	10.84	7	0.34	0.08	1.427	15.4687		53.5199	4.20609	42.274	8.27883	0.650626	6.53922	8.27883	0.026025	0.0219437
			Onions	8.45	9	0.28	0.05	0.395	3.33775		71.3251	1.22109	27.4538	2.38065	0.040757	0.91634	2.38065	0.00163028	0.00307497
			Vegetables, other	67.43	64	3.19	0.5	0.455	30.6807		65.672	2.57696	31.751	20.1486	0.790629	9.74142	20.1486	0.0316252	0.0326893
			Aquatic plants	0	0	0	0	0	0		65.672	2.57696	31.751	0	0	0	0	0	0
			Beans	1.97	18	1.19	0.09	1.61	3.1717		75.1226	5.04344	19.834	2.38266	0.159963	0.629075	2.38266	0.00639851	0.00211099
			Peas	0.51	5	0.32	0.02	0.896	0.45696		66.4257	5.15877	28.4155	0.303539	0.0235735	0.129848	0.303539	0.000942941	0.00043573
			Pulses, other	0.13	1	0.06	0.01	1.61	0.2093		65.672	2.57696	31.751	0.137452	0.00539358	0.0664549	0.137452	0.000215743	0.000223003
			Nuts	1.46	23	0.64	2.12	0.278	0.40588		62.5618	3.79852	33.6397	0.253926	0.0154174	0.136537	0.253926	0.000616697	0.000458177
			Soybeans	0.72	1	0.11	0.01	1.8925	1.3626		63.3478	1.20151	35.4507	0.863177	0.0163717	0.483051	0.863177	0.000654869	0.00162098
			Groundnuts (shelled equivalents)	1.34	19	0.85	1.61	2.497	3.34598		65.672	2.57696	31.751	2.19737	0.0862247	1.06238	2.19737	0.00344899	0.00356504
	Meat	Ruminant	Bovine meat	20.39	114	8.24	8.67	42.8	872.692	956.191	10.5	73	16.5	91.6327	637.065	143.994	91.6327	25.4826	0.483202	108.583	27.353	0.549609
			Mutton and goat meat	3.42	22	1.17	1.88	24.415	83.4993		20.3	56	23.7	16.9504	46.7596	19.7893	16.9504	1.87038	0.0664072
		Non-ruminant	Pig meat	29.42	158	7.85	13.74	7.282	214.236	412.384	47.5051	28.439	24.0559	101.773	60.9268	51.5365	101.773	2.43707	0.172941	206.339	3.20614	0.422456
			Poultry meat	24.48	102	11.85	5.75	6.092	149.132		53.86	5.83151	40.3085	80.3226	8.69666	60.1129	80.3226	0.347866	0.201721
			Meat, other	0.25	1	0.11	0.01	6.687	1.67175		49.4604	21.4829	29.0567	0.826855	0.35914	0.485755	0.826855	0.0143656	0.00163005
			Offals, edible	1.76	9	0.7	0.22	26.9	47.344		49.4604	21.4829	29.0567	23.4165	10.1709	13.7566	23.4165	0.406834	0.0461631
	Seafood		Freshwater fish	3.64	8	1.16	0.31	4.005	14.5782	82.5401	49.4604	21.4829	29.0567	7.21044	3.13182	4.23594	7.21044	0.125273	0.0142146	78.9064	0.337712	0.0327821
			Demersal fish	7.25	12	1.65	0.53	4.005	29.0362		78.6427	5.32556	16.0317	22.8349	1.54634	4.655	22.8349	0.0618537	0.0156208
			Pelagic fish	10.85	33	3.79	1.75	4.005	43.4542		91.6865	7.21239	1.10113	39.8417	3.13409	0.478489	39.8417	0.125364	0.00160567
			Marine fish, other	0	0	0	0	4.005	0		89.095	4.66193	6.24304	0	0	0	0	0	0
			Crustaceans	0.54	1	0.14	0.01	7.3405	3.96387		89.095	4.66193	6.24304	3.53161	0.184793	0.247466	3.53161	0.00739172	0.000830423
			Cephalopods	0.12	0	0.05	0	7.3405	0.88086		89.095	4.66193	6.24304	0.784802	0.0410651	0.0549924	0.784802	0.0016426	0.000184538
			Molluscs, other	0.7	0	0.06	0.01	7.3405	5.13835		90.3737	7.81574	1.81055	4.64372	0.4016	0.0930322	4.64372	0.016064	0.000312189
			Aquatic animals, others	0.01	0	0	0	6.6476	0.066476		89.095	4.66193	6.24304	0.0592268	0.00309907	0.00415012	0.0592268	0.000123963	1.39266e-05
	Dairy		Cream	4.54	24	0.34	2.4	2.781	12.6257	1313.9	24.1	56.7	19.2	3.0428	7.15879	2.42414	3.0428	0.286352	0.0081347	293.442	30.7793	0.842216
			Butter, ghee	4.28	84	0.11	9.51	2.781	11.9027		24.1	56.7	19.2	2.86855	6.74882	2.28531	2.86855	0.269953	0.00766884
			Milk (excluding butter) *includes cheese	358.16	522	32.13	33.05	3.6	1289.38		22.3	58.6	19.1	287.531	755.574	246.271	287.531	30.223	0.826412
	Eggs		Eggs	8.02	33	2.64	2.31	4.507	36.1461	36.1461	41.5	6.5	52	15.0006	2.3495	18.796	15.0006	0.09398	0.0630738	15.0006	0.09398	0.0630738
	Oils		Oilcrops, other	0.06	1	0.03	0.07	1.313	0.07878	99.9414	61.4	13	25.6	0.0483709	0.0102414	0.0201677	0.0483709	0.000409656	6.76768e-05	63.7112	0.446731	0.0839922
			Soybean oil	3.01	73	0	8.24	6.117	18.4122		61.4	13	25.6	11.3051	2.39358	4.71352	11.3051	0.0957433	0.0158172
			Groundnut oil	0	0	0	0	5.752	0		61.4	13	25.6	0	0	0	0	0	0
			Sunflowerseed oil	3.05	74	0	8.35	3.607	11.0014		61.4	13	25.6	6.75483	1.43018	2.81635	6.75483	0.057207	0.00945082
			Rape and mustard oil	3	128	0.05	14.46	3.828	11.484		65.1	3.3	31.6	7.47608	0.378972	3.62894	7.47608	0.0151589	0.0121777
			Cottonseed oil	0	0	0	0	5.752	0		61.4	13	25.6	0	0	0	0	0	0
			Palmkernel oil	0	4	0	0.43	5.752	0		56.142	28.9894	14.8685	0	0	0	0	0	0
			Sesame seed oil	0.07	2	0	0.2	5.752	0.40264		61.4	13	25.6	0.247221	0.0523432	0.103076	0.247221	0.00209373	0.000345892
			Palm oil	0	0	0	0	7.605	0		61.4923	12.9177	25.59	0	0	0	0	0	0
			Coconut oil	0	11	0.01	1.22	5.752	0		61.4	13	25.6	0	0	0	0	0	0
			Olive Oil	0.95	23	0	2.59	5.944	5.6468		89.1721	3.20831	7.61958	5.03537	0.181167	0.430263	5.03537	0.00724667	0.00144383
			Rice bran oil	0	0	0	0	5.752	0		61.4	13	25.6	0	0	0	0	0	0
			Maize germ oil	1.05	25	0	2.87	5.752	6.0396		61.4	13	25.6	3.70831	0.785148	1.54614	3.70831	0.0314059	0.00518838
			Oilcrops oil, other	2.82	56	0.05	6.28	5.752	16.2206		61.4	13	25.6	9.95947	2.10868	4.15248	9.95947	0.0843473	0.0139345
			Fats, animals, raw	4.24	83	0.01	9.19	6.733	28.5479		61.4	13	25.6	17.5284	3.71123	7.30827	17.5284	0.148449	0.0245244
			Fish, body oil	0	0	0	0	6.733	0		61.4	13	25.6	0	0	0	0	0	0
			Fish, liver oil	0.04	1	0	0.1	6.733	0.26932		61.4	13	25.6	0.165362	0.0350116	0.0689459	0.165362	0.00140046	0.000231362
			Sunflower seed	0.14	1	0.05	0.1	1.313	0.18382		61.4	13	25.6	0.112865	0.0238966	0.0470579	0.112865	0.000955864	0.000157912
			Rape and mustardseed	0	3	0	0	1.313	0		65.1	3.3	31.6	0	0	0	0	0	0
			Sesame seed	0.1	1	0.05	0.13	1.313	0.1313		61.4923	12.9177	25.59	0.0807394	0.0169609	0.0335997	0.0807394	0.000678438	0.000112751
			Palm kernels	0	0	0	0	1.313	0		56.142	28.9894	14.8685	0	0	0	0	0	0
			Olives (including preserved)	0.97	3	0.03	0.3	1.313	1.27361		89.1721	3.20831	7.61958	1.1357	0.0408613	0.0970437	1.1357	0.00163445	0.00032565
			Coconuts (including copra)	0.19	2	0.02	0.23	1.313	0.24947		61.4923	12.9177	25.59	0.153405	0	0.0638393	0.153405	0	0.000214226
	Beverages		Coffee	1.97	5	0.29	0	16.477	32.4597	231.526	53.6	0	46.4	17.3984	0	15.0613	17.3984	0	0.0505413	194.924	0.0737059	0.117632
			Wine	23.74	44	0	0	1.585	37.6279		79.6583	3.35563	17.7687	29.9737	1.26265	6.686	29.9737	0.0505061	0.0224363
			Beer	119.99	161	1.64	0	1.109	133.069		95	0	5	126.415	0	6.65345	126.415	0	0.022327
			Beverages, fermented	0.44	1	0	0	1.347	0.59268		82	3	15	0.485998	0.0177804	0.088902	0.485998	0.000711216	0.000298329
			Beverages, alcoholic	5.14	42	0	0	1.347	6.92358		82	3	15	5.67734	0.207707	1.03854	5.67734	0.0083083	0.00348502
			Tea (including mate)	1.72	2	0.47	0	12.124	20.8533		71.8	1.7	26.5	14.9727	0.354506	5.52612	14.9727	0.0141802	0.018544
	Other		Sugar cane	0	0	0	0	2.672	0	173.224	74.1	1.1	24.8	0	0	0	0	0	0	93.5681	1.55172	0.137594
			Sugar (non-centrifugal)	0	0	0	0	0.97	0		59.6	16.5	24	0	0	0	0	0	0
			Sugar beet	0	0	0	0	1.536	0		59.6	16.5	24	0	0	0	0	0	0
			Sugar (raw equivalent)	34.26	334	0	0	0.97	33.2322		30.4914	47.2261	22.2824	10.133	15.6943	7.40494	10.133	0.627772	0.0248488
			Sweeteners, other	48.39	113	0	0	0.97	46.9383		59.6	16.5	24	27.9752	7.74482	11.2652	27.9752	0.309793	0.0378027
			Honey	0.6	5	0.01	0	0.97	0.582		59.6	16.5	24	0.346872	0.09603	0.13968	0.346872	0.0038412	0.000468725
			Cocoa beans	0	48	0.52	4.4	18.681	0		59.6	16.5	24	0	0	0	0	0	0
			Pepper	0.18	1	0.05	0.01	12.124	2.18232		59.6	16.5	24	1.30066	0.360083	0.523757	1.30066	0.0144033	0.00175757
			Pimento	0.05	0	0.02	0.02	12.124	0.6062		59.6	16.5	24	0.361295	0.100023	0.145488	0.361295	0.00400092	0.000488215
			Cloves	0	0	0	0	12.124	0		59.6	16.5	24	0	0	0	0	0	0
			Spices, other	0.67	6	0.2	0.24	12.124	8.12308		59.6	16.5	24	4.84136	1.34031	1.94954	4.84136	0.0536123	0.00654208
			Infant food	0	0	0	0	2.781	0		24.6	56.4	19	0	0	0	0	0	0
			Miscellaneous	11.92	13	0.39	0.16	6.84227	81.5599		59.6	16.5	24	48.6097	13.4574	19.5744	48.6097	0.538295	0.0656858
Italy	Grain products (non-rice)		Wheat	145.56	1035	32.62	3.84	1.4	203.784	211.602	57.9	1.8	40.3	117.991	3.66811	82.125	117.991	0.146724	0.275587	123.25	0.152817	0.283674	60550000	6.88923e+10	2.75373e+09	1.39081e+08
			Barley	0.31	3	0.09	0.01	1.313	0.40703		54.569	1.91155	43.5195	0.222112	0.00778059	0.177137	0.222112	0.000311224	0.000594421
			Maize	4.46	34	0.78	0.11	0.988	4.40648		71.9	2.05597	26.1	3.16826	0.0905961	1.15009	3.16826	0.00362384	0.00385937
[truncated: 2,087 more rows]

## Sheet: Industrialized Asia
Country	Food Group		Food Item	Consumption (kg food/capita/yr)	Caloric Consumption (kcal/capita/yr)	Protein Consumption (g/capita/day)	Fat Consumption (g/capita/day)	Greenhouse Gas Emissions (kg CO2e/kg)	Consumption Emissions (kg CO2e/capita/yr)	Food Group Consumption Emissions (kg CO2e/capita/yr)	Percent by Component Gas			Greenhouse Gas Emissions (kg CO2e/capita/yr)			Greenhouse Gas Emissions (kg gas/capita/yr)			Food Group Emission (kg gas/capita/yr)			Population (Year 2019)	Sum of Dietary Emissions (kg gas/yr)
														CO2	CH4	N2O	CO2	CH4	N2O	CO2	CH4	N2O		CO2	CH4	N2O
China	Grain products (non-rice)		Wheat	64.34	560	17.89	3.01	1.4	90.076	102.229	57.9	1.8	40.3	52.154	1.62137	36.3006	52.154	0.0648547	0.121814	60.3751	0.0743372	0.134226	1465634000	1.38072e+12	4.43032e+10	2.36113e+09
			Barley	0.3	2	0.05	0.01	1.313	0.3939		54.569	1.91155	43.5195	0.214947	0.00752961	0.171423	0.214947	0.000301184	0.000575246
			Maize	7.18	57	1.24	0.19	0.988	7.09384		71.9	2.05597	26.1	5.10047	0.145848	1.85149	5.10047	0.0058339	0.00621306
			Millet	0.51	4	0.11	0.03	1.313	0.66963		61.8	1.8	36.4	0.413831	0.0120533	0.243745	0.413831	0.000482134	0.000817937
			Rye	0.14	1	0.03	0	1.4	0.196		73.3007	1.65211	25.0472	0.143669	0.00323814	0.0490925	0.143669	0.000129526	0.00016474
			Oats	0.22	1	0.05	0.02	1.575	0.3465		61.8	1.8	36.4	0.214137	0.006237	0.126126	0.214137	0.00024948	0.000423242
			Sorghum	2.17	16	0.48	0.16	1.313	2.84921		61.8	1.8	36.4	1.76081	0.0512858	1.03711	1.76081	0.00205143	0.00348024
			Cereals, other	0.46	3	0.1	0.02	1.313	0.60398		61.8	1.8	36.4	0.37326	0.0108716	0.219849	0.37326	0.000434866	0.000737747
	Rice		Rice (milled equivalent)	118.29	813	14.8	2.81	3.839	454.115	454.115	22.2	71.8	6	100.814	326.055	27.2469	100.814	13.0422	0.0914326	100.814	13.0422	0.0914326
	Fruit		Oranges, mandarines	17.46	14	0.24	0.05	0.317	5.53482	58.2166	56.9055	1.22138	41.8731	3.14962	0.0676011	2.3176	3.14962	0.00270404	0.00777719	40.1529	0.0543114	0.05606
			Lemons, limes	1.46	1	0.02	0.05	0.317	0.46282		56.3759	0	43.6241	0.260919	0	0.201901	0.260919	0	0.00067752
			Grapefruit	2.92	2	0.03	0.01	0.317	0.92564		68.8513	2.47131	28.6774	0.637315	0.0228754	0.26545	0.637315	0.000915016	0.000890771
			Citrus, other	3.57	3	0.05	0.02	0.317	1.13169		68.8513	2.47131	28.6774	0.779183	0.0279675	0.324539	0.779183	0.0011187	0.00108906
			Bananas	7.21	12	0.16	0.04	0.678	4.88838		79.4125	3.10136	17.4861	3.88199	0.151606	0.854788	3.88199	0.00606424	0.00286842
			Plantains	0	0	0	0	0.6632	0		68.8513	2.47131	28.6774	0	0	0	0	0	0
			Apples	21.24	26	0.18	0.12	0.357	7.58268		72.4477	2.06109	25.4912	5.49348	0.156286	1.93291	5.49348	0.00625145	0.00648629
			Pineapples	1.44	1	0.01	0.01	0.6632	0.955008		68.8513	2.47131	28.6774	0.657535	0.0236012	0.273872	0.657535	0.000944047	0.000919032
			Dates	0.11	1	0	0	0.6632	0.072952		68.8513	2.47131	28.6774	0.0502284	0.00180287	0.0209207	0.0502284	7.21147e-05	7.02039e-05
			Grapes (excluding wine)	7.15	8	0.08	0.04	1.214	8.6801		68.8513	2.47131	28.6774	5.97636	0.214512	2.48923	5.97636	0.00858047	0.00835312
			Fruits, other	37.31	43	0.51	0.33	0.75	27.9825		68.8513	2.47131	28.6774	19.2663	0.691533	8.02466	19.2663	0.0276613	0.0269284
	Vegetables		Cassava	1.94	6	0.05	0.01	0.987	1.91478	249.124	83.6105	0.362596	16.0269	1.60096	0.00694292	0.306881	1.60096	0.000277717	0.0010298	156.793	0.277723	0.286535
			Potatoes	41.9	81	1.95	0.11	0.37	15.503		59.711	1.6649	38.6241	9.25699	0.25811	5.9879	9.25699	0.0103244	0.0200936
			Sweet potatoes	18.39	50	0.5	0.15	0.365	6.71235		65.672	2.57696	31.751	4.40814	0.172975	2.13124	4.40814	0.00691899	0.00715181
			Yams	0	0	0	0	0.365	0		65.672	2.57696	31.751	0	0	0	0	0	0
			Roots, other	1.08	3	0.05	0.01	0.365	0.3942		65.672	2.57696	31.751	0.258879	0.0101584	0.125163	0.258879	0.000406336	0.000420009
			Tomatoes	36.86	19	1.1	0.3	1.427	52.5992		53.5199	4.20609	42.274	28.1511	2.21237	22.2358	28.1511	0.0884947	0.0746167
			Onions	14.7	15	0.6	0.08	0.395	5.8065		71.3251	1.22109	27.4538	4.14149	0.0709027	1.59411	4.14149	0.00283611	0.00534935
			Vegetables, other	311.86	213	12.16	1.84	0.455	141.896		65.672	2.57696	31.751	93.1862	3.65662	45.0535	93.1862	0.146265	0.151186
			Aquatic plants	12.31	12	0.92	0.05	0	0		65.672	2.57696	31.751	0	0	0	0	0	0
			Beans	0.07	1	0.04	0	1.61	0.1127		75.1226	5.04344	19.834	0.0846631	0.00568396	0.0223529	0.0846631	0.000227358	7.50098e-05
			Peas	0.49	5	0.3	0.02	0.896	0.43904		66.4257	5.15877	28.4155	0.291635	0.0226491	0.124755	0.291635	0.000905963	0.000418643
			Pulses, other	0.88	8	0.55	0.05	1.61	1.4168		65.672	2.57696	31.751	0.930441	0.0365104	0.449848	0.930441	0.00146042	0.00150956
			Nuts	2.57	18	0.45	1.11	0.278	0.71446		62.5618	3.79852	33.6397	0.446979	0.0271389	0.240342	0.446979	0.00108555	0.000806516
			Soybeans	3.61	34	3.2	1.15	1.8925	6.83193		63.3478	1.20151	35.4507	4.32788	0.082086	2.42196	4.32788	0.00328344	0.00812739
			Groundnuts (shelled equivalents)	5.92	59	2.58	4.98	2.497	14.7822		65.672	2.57696	31.751	9.70779	0.380933	4.69351	9.70779	0.0152373	0.01575
	Meat	Ruminant	Bovine meat	5.48	29	2.06	2.2	42.8	234.544	319.752	10.5	73	16.5	24.6271	171.217	38.6998	24.6271	6.84868	0.129865	41.9244	8.75735	0.197631
			Mutton and goat meat	3.49	20	1.31	1.54	24.415	85.2083		20.3	56	23.7	17.2973	47.7167	20.1944	17.2973	1.90867	0.0677664
		Non-ruminant	Pig meat	38.29	370	11.59	35.48	7.282	278.828	480.552	47.5051	28.439	24.0559	132.457	79.296	67.0745	132.457	3.17184	0.225082	236.042	4.36294	0.454483
			Poultry meat	14.22	66	4.62	5.07	6.092	86.6282		53.86	5.83151	40.3085	46.658	5.05174	34.9185	46.658	0.20207	0.117176
			Meat, other	0.96	3	0.43	0.12	6.687	6.41952		49.4604	21.4829	29.0567	3.17512	1.3791	1.8653	3.17512	0.0551639	0.0062594
			Offals, edible	4.04	12	1.97	0.4	26.9	108.676		49.4604	21.4829	29.0567	53.7516	23.3467	31.5776	53.7516	0.93387	0.105965
	Seafood		Freshwater fish	17.53	33	5.22	1.2	4.005	70.2077	136.715	49.4604	21.4829	29.0567	34.725	15.0826	20.4	34.725	0.603305	0.0684564	156.088	0.955347	0.09044
			Demersal fish	3.38	6	1.18	0.07	4.005	13.5369		78.6427	5.32556	16.0317	10.6458	0.720916	2.17019	10.6458	0.0288366	0.00728253
			Pelagic fish	0.38	1	0.12	0.04	4.005	1.5219		91.6865	7.21239	1.10113	1.39538	0.109765	0.0167581	1.39538	0.00439061	5.62353e-05
			Marine fish, other	1.61	4	0.5	0.14	4.005	6.44805		89.095	4.66193	6.24304	5.74489	0.300604	0.402554	5.74489	0.0120241	0.00135085
			Crustaceans	4.55	6	1.13	0.06	7.3405	33.3993		89.095	4.66193	6.24304	29.7571	1.55705	2.08513	29.7571	0.0622821	0.00699708
			Cephalopods	0.59	1	0.23	0.01	7.3405	4.33089		89.095	4.66193	6.24304	3.85861	0.201903	0.27038	3.85861	0.00807613	0.000907314
			Molluscs, other	9.93	4	0.63	0.06	7.3405	72.8912		90.3737	7.81574	1.81055	65.8745	5.69698	1.31973	65.8745	0.227879	0.00442862
			Aquatic animals, others	0.69	1	0.07	0	6.6476	4.58684		89.095	4.66193	6.24304	4.08665	0.213836	0.286359	4.08665	0.00855342	0.000960935
	Dairy		Cream	0.1	1	0.01	0.05	2.781	0.2781	83.9633	24.1	56.7	19.2	0.0670221	0.157683	0.0533952	0.0670221	0.00630731	0.000179179	18.7363	1.96757	0.0538177
			Butter, ghee	0.15	3	0	0.36	2.781	0.41715		24.1	56.7	19.2	0.100533	0.236524	0.0800928	0.100533	0.00946096	0.000268768
			Milk (excluding butter) *includes cheese	23.13	52	2.72	2.84	3.6	83.268		22.3	58.6	19.1	18.5688	48.795	15.9042	18.5688	1.9518	0.0533698
	Eggs		Eggs	19.74	80	6.19	5.67	4.507	88.9682	88.9682	41.5	6.5	52	36.9218	5.78293	46.2635	36.9218	0.231317	0.155246	36.9218	0.231317	0.155246
	Oils		Oilcrops, other	0	0	0	0	1.313	0	62.8032	61.4	13	25.6	0	0	0	0	0	0	38.8117	0.303303	0.0548188
			Soybean oil	2.67	65	0	7.32	6.117	16.3324		61.4	13	25.6	10.0281	2.12321	4.18109	10.0281	0.0849284	0.0140305
			Groundnut oil	0.71	17	0	1.93	5.752	4.08392		61.4	13	25.6	2.50753	0.53091	1.04548	2.50753	0.0212364	0.00350833
			Sunflowerseed oil	0.19	4	0	0.51	3.607	0.68533		61.4	13	25.6	0.420793	0.0890929	0.175444	0.420793	0.00356372	0.00058874
			Rape and mustard oil	1.46	35	0	4	3.828	5.58888		65.1	3.3	31.6	3.63836	0.184433	1.76609	3.63836	0.00737732	0.00592646
			Cottonseed oil	0.53	13	0	1.45	5.752	3.04856		61.4	13	25.6	1.87182	0.396313	0.780431	1.87182	0.0158525	0.0026189
			Palmkernel oil	0.07	2	0	0.19	5.752	0.40264		56.142	28.9894	14.8685	0.22605	0.116723	0.0598666	0.22605	0.00466892	0.000200895
			Sesame seed oil	0.21	5	0	0.56	5.752	1.20792		61.4	13	25.6	0.741663	0.15703	0.309228	0.741663	0.00628118	0.00103768
			Palm oil	2.06	50	0	5.65	7.605	15.6663		61.4923	12.9177	25.59	9.63357	2.02373	4.009	9.63357	0.0809491	0.013453
			Coconut oil	0.1	3	0	0.29	5.752	0.5752		61.4	13	25.6	0.353173	0.074776	0.147251	0.353173	0.00299104	0.000494132
			Olive Oil	0.03	1	0	0.09	5.944	0.17832		89.1721	3.20831	7.61958	0.159012	0.00572106	0.0135872	0.159012	0.000228842	4.55948e-05
			Rice bran oil	0.08	2	0	0.22	5.752	0.46016		61.4	13	25.6	0.282538	0.0598208	0.117801	0.282538	0.00239283	0.000395305
			Maize germ oil	0.21	5	0	0.58	5.752	1.20792		61.4	13	25.6	0.741663	0.15703	0.309228	0.741663	0.00628118	0.00103768
			Oilcrops oil, other	0.09	2	0	0.25	5.752	0.51768		61.4	13	25.6	0.317856	0.0672984	0.132526	0.317856	0.00269194	0.000444718
			Fats, animals, raw	1.76	40	0	4.45	6.733	11.8501		61.4	13	25.6	7.27595	1.54051	3.03362	7.27595	0.0616204	0.0101799
			Fish, body oil	0	0	0	0	6.733	0		61.4	13	25.6	0	0	0	0	0	0
			Fish, liver oil	0	0	0	0	6.733	0		61.4	13	25.6	0	0	0	0	0	0
			Sunflower seed	0	0	0	0	1.313	0		61.4	13	25.6	0	0	0	0	0	0
			Rape and mustardseed	0	0	0	0	1.313	0		65.1	3.3	31.6	0	0	0	0	0	0
			Sesame seed	0.33	5	0.16	0.48	1.313	0.43329		61.4923	12.9177	25.59	0.26644	0.0559711	0.110879	0.26644	0.00223884	0.000372077
			Palm kernels	0	0	0	0	1.313	0		56.142	28.9894	14.8685	0	0	0	0	0	0
			Olives (including preserved)	0	0	0	0	1.313	0		89.1721	3.20831	7.61958	0	0	0	0	0	0
			Coconuts (including copra)	0.43	2	0.02	0.16	1.313	0.56459		61.4923	12.9177	25.59	0.347179	0	0.144479	0.347179	0	0.000484827
	Beverages		Coffee	0.08	0	0.01	0	16.477	1.31816	58.3993	53.6	0	46.4	0.706534	0	0.611626	0.706534	0	0.00205244	49.908	0.0256231	0.0264208
			Wine	1.82	3	0	0	1.585	2.8847		79.6583	3.35563	17.7687	2.2979	0.0967998	0.512575	2.2979	0.00387199	0.00172005
			Beer	27.03	36	0.37	0	1.109	29.9763		95	0	5	28.4775	0	1.49881	28.4775	0	0.00502958
			Beverages, fermented	2.14	3	0.01	0	1.347	2.88258		82	3	15	2.36372	0.0864774	0.432387	2.36372	0.0034591	0.00145096
			Beverages, alcoholic	5.4	44	0	0	1.347	7.2738		82	3	15	5.96452	0.218214	1.09107	5.96452	0.00872856	0.00366131
			Tea (including mate)	1.16	1	0.32	0	12.124	14.0638		71.8	1.7	26.5	10.0978	0.239085	3.72692	10.0978	0.00956341	0.0125064
	Other		Sugar cane	0.02	0	0	0	2.672	0.05344	12.8365	74.1	1.1	24.8	0.039599	0.00058784	0.0132531	0.039599	2.35136e-05	4.44736e-05	5.49695	0.175978	0.00988419
			Sugar (non-centrifugal)	0.21	2	0.01	0	0.97	0.2037		59.6	16.5	24	0.121405	0.0336105	0.048888	0.121405	0.00134442	0.000164054
			Sugar beet	0	0	0	0	1.536	0		59.6	16.5	24	0	0	0	0	0	0
			Sugar (raw equivalent)	7.31	73	0	0	0.97	7.0907		30.4914	47.2261	22.2824	2.16206	3.34866	1.57998	2.16206	0.133947	0.00530195
			Sweeteners, other	0.36	2	0	0	0.97	0.3492		59.6	16.5	24	0.208123	0.057618	0.083808	0.208123	0.00230472	0.000281235
			Honey	0.22	2	0	0	0.97	0.2134		59.6	16.5	24	0.127186	0.035211	0.051216	0.127186	0.00140844	0.000171866
			Cocoa beans	0	1	0.02	0.06	18.681	0		59.6	16.5	24	0	0	0	0	0	0
			Pepper	0.03	0	0.01	0	12.124	0.36372		59.6	16.5	24	0.216777	0.0600138	0.0872928	0.216777	0.00240055	0.000292929
			Pimento	0.13	1	0.04	0.04	12.124	1.57612		59.6	16.5	24	0.939368	0.26006	0.378269	0.939368	0.0104024	0.00126936
			Cloves	0	0	0	0	12.124	0		59.6	16.5	24	0	0	0	0	0	0
			Spices, other	0.15	1	0.04	0.05	12.124	1.8186		59.6	16.5	24	1.08389	0.300069	0.436464	1.08389	0.0120028	0.00146464
			Infant food	0.1	1	0.04	0.01	2.781	0.2781		24.6	56.4	19	0.0684126	0.156848	0.052839	0.0684126	0.00627394	0.000177312
			Miscellaneous	0.13	0	0	0	6.84227	0.889495		59.6	16.5	24	0.530139	0.146767	0.213479	0.530139	0.00587067	0.000716372
Democratic People's Republic of Korea	Grain products (non-rice)		Wheat	19.45	144	4.1	0.6	1.4	27.23	71.9473	57.9	1.8	40.3	15.7662	0.49014	10.9737	15.7662	0.0196056	0.0368245	47.7787	0.0563216	0.0764599	25666000	9.7896e+09	3.97998e+08	1.40211e+07
			Barley	0.53	3	0.09	0.01	1.313	0.69589		54.569	1.91155	43.5195	0.37974	0.0133023	0.302848	0.37974	0.000532092	0.00101627
			Maize	44.37	356	8.67	3.75	0.988	43.8376		71.9	2.05597	26.1	31.5192	0.901289	11.4416	31.5192	0.0360516	0.0383946
			Millet	0.02	1.94	13	0.22	1.313	0.02626		61.8	1.8	36.4	0.0162287	0.00047268	0.00955864	0.0162287	1.89072e-05	3.2076e-05
			Rye	0	0	0	0	1.4	0		73.3007	1.65211	25.0472	0	0	0	0	0	0
			Oats	0	0.25	1	0.05	1.575	0		61.8	1.8	36.4	0	0	0	0	0	0
			Sorghum	0.06	1.15	8	0.18	1.313	0.07878		61.8	1.8	36.4	0.048686	0.00141804	0.0286759	0.048686	5.67216e-05	9.62279e-05
			Cereals, other	0.06	0	0	0	1.313	0.07878		61.8	1.8	36.4	0.048686	0.00141804	0.0286759	0.048686	5.67216e-05	9.62279e-05
	Rice		Rice (milled equivalent)	111.21	725	12.68	1.58	3.839	426.935	426.935	22.2	71.8	6	94.7796	306.539	25.6161	94.7796	12.2616	0.0859601	94.7796	12.2616	0.0859601
	Fruit		Oranges, mandarines	1.33	1	0.02	0	0.317	0.42161	32.975	56.9055	1.22138	41.8731	0.239919	0.00514945	0.176541	0.239919	0.000205978	0.000592421	23.0233	0.030792	0.0308115
			Lemons, limes	0	0	0	0	0.317	0		56.3759	0	43.6241	0	0	0	0	0	0
			Grapefruit	0	0	0	0	0.317	0		68.8513	2.47131	28.6774	0	0	0	0	0	0
			Citrus, other	0	0	0	0	0.317	0		68.8513	2.47131	28.6774	0	0	0	0	0	0
			Bananas	0.19	0	0	0	0.678	0.12882		79.4125	3.10136	17.4861	0.102299	0.00399517	0.0225256	0.102299	0.000159807	7.55894e-05
			Plantains	0	0	0	0	0.6632	0		68.8513	2.47131	28.6774	0	0	0	0	0	0
			Apples	27.76	32	0.23	0.15	0.357	9.91032		72.4477	2.06109	25.4912	7.1798	0.204261	2.52626	7.1798	0.00817044	0.00847737
			Pineapples	0.05	0	0	0	0.6632	0.03316		68.8513	2.47131	28.6774	0.0228311	0.000819485	0.00950943	0.0228311	3.27794e-05	3.19108e-05
			Dates	0	0	0	0	0.6632	0		68.8513	2.47131	28.6774	0	0	0	0	0	0
			Grapes (excluding wine)	0.04	0	0	0	1.214	0.04856		68.8513	2.47131	28.6774	0.0334342	0.00120007	0.0139258	0.0334342	4.80027e-05	4.67307e-05
			Fruits, other	29.91	34	0.39	0.33	0.75	22.4325		68.8513	2.47131	28.6774	15.4451	0.554376	6.43306	15.4451	0.022175	0.0215875
	Vegetables		Cassava	0	0	0	0	0.987	0	103.086	83.6105	0.362596	16.0269	0	0	0	0	0	0	67.8209	0.115789	0.108625
			Potatoes	47.93	93	2.23	0.13	0.37	17.7341		59.711	1.6649	38.6241	10.5892	0.295255	6.84964	10.5892	0.0118102	0.0229854
			Sweet potatoes	13.35	37	0.37	0.11	0.365	4.87275		65.672	2.57696	31.751	3.20003	0.125569	1.54715	3.20003	0.00502276	0.00519177
			Yams	0	0	0	0	0.365	0		65.672	2.57696	31.751	0	0	0	0	0	0
			Roots, other	0	0	0	0	0.365	0		65.672	2.57696	31.751	0	0	0	0	0	0
			Tomatoes	2.37	1	0.07	0.02	1.427	3.38199		53.5199	4.20609	42.274	1.81004	0.142249	1.4297	1.81004	0.00568998	0.00479766
			Onions	3.25	3	0.13	0.02	0.395	1.28375		71.3251	1.22109	27.4538	0.915636	0.0156758	0.352438	0.915636	0.000627031	0.00118268
			Vegetables, other	117.46	75	4.51	0.73	0.455	53.4443		65.672	2.57696	31.751	35.0979	1.37724	16.9691	35.0979	0.0550896	0.0569433
			Aquatic plants	0	0	0	0	0	0		65.672	2.57696	31.751	0	0	0	0	0	0
			Beans	10.75	100	6.51	0.5	1.61	17.3075		75.1226	5.04344	19.834	13.0018	0.872893	3.43277	13.0018	0.0349157	0.0115194
			Peas	0	0	0	0	0.896	0		66.4257	5.15877	28.4155	0	0	0	0	0	0
			Pulses, other	0	0	0	0	1.61	0		65.672	2.57696	31.751	0	0	0	0	0	0
			Nuts	0.6	3	0.1	0.15	0.278	0.1668		62.5618	3.79852	33.6397	0.104353	0.00633592	0.0561109	0.104353	0.000253437	0.000188292
			Soybeans	2.56	26	2.41	0.91	1.8925	4.8448		63.3478	1.20151	35.4507	3.06908	0.0582106	1.71751	3.06908	0.00232842	0.00576347
			Groundnuts (shelled equivalents)	0.02	0	0.01	0.02	2.497	0.04994		65.672	2.57696	31.751	0.0327966	0.00128694	0.0158565	0.0327966	5.14774e-05	5.32096e-05
	Meat	Ruminant	Bovine meat	0.87	5	0.33	0.42	42.8	37.236	52.3733	10.5	73	16.5	3.90978	27.1823	6.14394	3.90978	1.08729	0.0206172	6.98265	1.42637	0.032656
			Mutton and goat meat	0.62	3	0.26	0.18	24.415	15.1373		20.3	56	23.7	3.07287	8.47689	3.58754	3.07287	0.339076	0.0120387
		Non-ruminant	Pig meat	4.32	45	1.39	4.35	7.282	31.4582	97.4927	47.5051	28.439	24.0559	14.9443	8.94642	7.56756	14.9443	0.357857	0.0253945	48.0528	0.861608	0.0936231
			Poultry meat	1.67	8	0.52	0.59	6.092	10.1736		53.86	5.83151	40.3085	5.47952	0.593277	4.10084	5.47952	0.0237311	0.0137612
			Meat, other	5.94	19	2.77	0.81	6.687	39.7208		49.4604	21.4829	29.0567	19.6461	8.53317	11.5415	19.6461	0.341327	0.03873
			Offals, edible	0.6	2	0.29	0.06	26.9	16.14		49.4604	21.4829	29.0567	7.98291	3.46734	4.68975	7.98291	0.138694	0.0157374
	Seafood		Freshwater fish	0.57	1	0.17	0.04	4.005	2.28285	45.2413	49.4604	21.4829	29.0567	1.12911	0.490422	0.663321	1.12911	0.0196169	0.00222591	39.3599	0.114759	0.0177694
			Demersal fish	5.18	5	1.07	0.1	4.005	20.7459		78.6427	5.32556	16.0317	16.3151	1.10484	3.32592	16.3151	0.0441934	0.0111608
			Pelagic fish	0.61	1	0.21	0.06	4.005	2.44305		91.6865	7.21239	1.10113	2.23995	0.176202	0.0269012	2.23995	0.00704809	9.02725e-05
			Marine fish, other	3.82	7	1.25	0.21	4.005	15.2991		89.095	4.66193	6.24304	13.6307	0.713234	0.955129	13.6307	0.0285293	0.00320513
			Crustaceans	0.33	0	0.08	0	7.3405	2.42237		89.095	4.66193	6.24304	2.15821	0.112929	0.151229	2.15821	0.00451716	0.000507481
			Cephalopods	0.29	1	0.11	0.01	7.3405	2.12874		89.095	4.66193	6.24304	1.89661	0.0992406	0.132898	1.89661	0.00396963	0.000445968
			Molluscs, other	0.3	0	0.02	0	7.3405	2.20215		90.3737	7.81574	1.81055	1.99016	0.172114	0.0398709	1.99016	0.00688457	0.000133795
			Aquatic animals, others	0	0	0	0	6.6476	0		89.095	4.66193	6.24304	0	0	0	0	0	0
	Dairy		Cream	0	0	0	0	2.781	0	10.6118	24.1	56.7	19.2	0	0	0	0	0	0	2.36693	0.24872	0.00680162
			Butter, ghee	0.01	0	0	0.03	2.781	0.02781		24.1	56.7	19.2	0.00670221	0.0157683	0.00533952	0.00670221	0.000630731	1.79179e-05
			Milk (excluding butter) *includes cheese	2.94	5	0.26	0.29	3.6	10.584		22.3	58.6	19.1	2.36023	6.20222	2.02154	2.36023	0.248089	0.0067837
	Eggs		Eggs	4.51	18	1.42	1.26	4.507	20.3266	20.3266	41.5	6.5	52	8.43553	1.32123	10.5698	8.43553	0.0528491	0.0354692	8.43553	0.0528491	0.0354692
	Oils		Oilcrops, other	0	0	0	0	1.313	0	37.5812	61.4	13	25.6	0	0	0	0	0	0	23.0766	0.195359	0.0322839
			Soybean oil	3.84	93	0	10.53	6.117	23.4893		61.4	13	25.6	14.4224	3.05361	6.01326	14.4224	0.122144	0.0201787
			Groundnut oil	0	0	0	0	5.752	0		61.4	13	25.6	0	0	0	0	0	0
			Sunflowerseed oil	0.01	0	0	0.02	3.607	0.03607		61.4	13	25.6	0.022147	0.0046891	0.00923392	0.022147	0.000187564	3.09863e-05
			Rape and mustard oil	0	0	0	0	3.828	0		65.1	3.3	31.6	0	0	0	0	0	0
			Cottonseed oil	0.16	4	0	0.43	5.752	0.92032		61.4	13	25.6	0.565076	0.119642	0.235602	0.565076	0.00478566	0.00079061
			Palmkernel oil	0	0	0	0	5.752	0		56.142	28.9894	14.8685	0	0	0	0	0	0
			Sesame seed oil	0	0	0	0.01	5.752	0		61.4	13	25.6	0	0	0	0	0	0
			Palm oil	0.25	6	0	0.69	7.605	1.90125		61.4923	12.9177	25.59	1.16912	0.245598	0.48653	1.16912	0.00982391	0.00163265
			Coconut oil	0	0	0	0	5.752	0		61.4	13	25.6	0	0	0	0	0	0
			Olive Oil	0	0	0	0	5.944	0		89.1721	3.20831	7.61958	0	0	0	0	0	0
			Rice bran oil	0.5	12	0	1.38	5.752	2.876		61.4	13	25.6	1.76586	0.37388	0.736256	1.76586	0.0149552	0.00247066
			Maize germ oil	1.02	25	0	2.79	5.752	5.86704		61.4	13	25.6	3.60236	0.762715	1.50196	3.60236	0.0305086	0.00504014
			Oilcrops oil, other	0	0	0	0.06	5.752	0		61.4	13	25.6	0	0	0	0	0	0
			Fats, animals, raw	0.37	8	0.04	0.84	6.733	2.49121		61.4	13	25.6	1.5296	0.323857	0.63775	1.5296	0.0129543	0.0021401
			Fish, body oil	0	0	0	0	6.733	0		61.4	13	25.6	0	0	0	0	0	0
			Fish, liver oil	0	0	0	0	6.733	0		61.4	13	25.6	0	0	0	0	0	0
			Sunflower seed	0	0	0	0	1.313	0		61.4	13	25.6	0	0	0	0	0	0
			Rape and mustardseed	0	0	0	0	1.313	0		65.1	3.3	31.6	0	0	0	0	0	0
			Sesame seed	0	0	0	0	1.313	0		61.4923	12.9177	25.59	0	0	0	0	0	0
			Palm kernels	0	0	0	0	1.313	0		56.142	28.9894	14.8685	0	0	0	0	0	0
			Olives (including preserved)	0	0	0	0	1.313	0		89.1721	3.20831	7.61958	0	0	0	0	0	0
			Coconuts (including copra)	0	0	0	0	1.313	0		61.4923	12.9177	25.59	0	0	0	0	0	0
	Beverages		Coffee	0.39	0	0.02	0	16.477	6.42603	16.822	53.6	0	46.4	3.44435	0	2.98168	3.44435	0	0.0100056	12.2166	0.0101884	0.0145999
			Wine	0.01	0	0	0	1.585	0.01585		79.6583	3.35563	17.7687	0.0126258	0.000531867	0.00281635	0.0126258	2.12747e-05	9.45082e-06
			Beer	1.72	2	0.02	0	1.109	1.90748		95	0	5	1.81211	0	0.095374	1.81211	0	0.000320047
			Beverages, fermented	0	0	0	0	1.347	0		82	3	15	0	0	0	0	0	0
			Beverages, alcoholic	6.29	51	0	0	1.347	8.47263		82	3	15	6.94756	0.254179	1.27089	6.94756	0.0101672	0.00426475
			Tea (including mate)	0	0	0	0	12.124	0		71.8	1.7	26.5	0	0	0	0	0	0
	Other		Sugar cane	0	0	0	0	2.672	0	14.1768	74.1	1.1	24.8	0	0	0	0	0	0	7.5292	0.132485	0.0112299
			Sugar (non-centrifugal)	0	0	0	0	0.97	0		59.6	16.5	24	0	0	0	0	0	0
			Sugar beet	0	0	0	0	1.536	0		59.6	16.5	24	0	0	0	0	0	0
			Sugar (raw equivalent)	3.19	31	0	0	0.97	3.0943		30.4914	47.2261	22.2824	0.943496	1.46132	0.689485	0.943496	0.0584527	0.00231371
			Sweeteners, other	0.25	2	0	0	0.97	0.2425		59.6	16.5	24	0.14453	0.0400125	0.0582	0.14453	0.0016005	0.000195302
			Honey	0	0	0	0	0.97	0		59.6	16.5	24	0	0	0	0	0	0
			Cocoa beans	0	0	0	0.03	18.681	0		59.6	16.5	24	0	0	0	0	0	0
			Pepper	0	0	0	0	12.124	0		59.6	16.5	24	0	0	0	0	0	0
			Pimento	0.28	2	0.09	0.13	12.124	3.39472		59.6	16.5	24	2.02325	0.560129	0.814733	2.02325	0.0224052	0.002734
			Cloves	0	0	0	0	12.124	0		59.6	16.5	24	0	0	0	0	0	0
			Spices, other	0	0	0	0	12.124	0		59.6	16.5	24	0	0	0	0	0	0
			Infant food	0.02	0	0.01	0	2.781	0.05562		24.6	56.4	19	0.0136825	0.0313697	0.0105678	0.0136825	0.00125479	3.54624e-05
			Miscellaneous	1.08	1	0.04	0.01	6.84227	7.38965		59.6	16.5	24	4.40423	1.21929	1.77352	4.40423	0.0487717	0.0059514
Japan	Grain products (non-rice)		Wheat	43.6	381	10.52	1.65	1.4	61.04	76.5188	57.9	1.8	40.3	35.3422	1.09872	24.5991	35.3422	0.0439488	0.0825474	46.1664	0.0564735	0.0971408	126860000	1.05359e+11	3.76038e+09	1.77786e+08
			Barley	0.69	6	0.2	0.03	1.313	0.90597		54.569	1.91155	43.5195	0.494378	0.0173181	0.394274	0.494378	0.000692724	0.00132307
			Maize	13.25	81	0.21	0.26	0.988	13.091		71.9	2.05597	26.1	9.41243	0.269148	3.41675	9.41243	0.0107659	0.0114656
			Millet	0.06	0	0.01	0	1.313	0.07878		61.8	1.8	36.4	0.048686	0.00141804	0.0286759	0.048686	5.67216e-05	9.62279e-05
			Rye	0.01	0	0	0	1.4	0.014		73.3007	1.65211	25.0472	0.0102621	0.000231296	0.00350661	0.0102621	9.25184e-06	1.17671e-05
			Oats	0.14	1	0.05	0.02	1.575	0.2205		61.8	1.8	36.4	0.136269	0.003969	0.080262	0.136269	0.00015876	0.000269336
			Sorghum	0	0	0	0	1.313	0		61.8	1.8	36.4	0	0	0	0	0	0
			Cereals, other	0.89	7	0.15	0.02	1.313	1.16857		61.8	1.8	36.4	0.722176	0.0210343	0.425359	0.722176	0.00084137	0.00142738
	Rice		Rice (milled equivalent)	81.08	582	10.35	1.29	3.839	311.266	311.266	22.2	71.8	6	69.1011	223.489	18.676	69.1011	8.93956	0.062671	69.1011	8.93956	0.062671
	Fruit		Oranges, mandarines	6.75	6	0.11	0.02	0.317	2.13975	19.7834	56.9055	1.22138	41.8731	1.21764	0.0261344	0.895981	1.21764	0.00104538	0.00300665	13.8856	0.0191553	0.0181842
			Lemons, limes	0.43	0	0.01	0.01	0.317	0.13631		56.3759	0	43.6241	0.0768461	0	0.0594639	0.0768461	0	0.000199543
			Grapefruit	0.64	1	0.01	0	0.317	0.20288		68.8513	2.47131	28.6774	0.139685	0.00501379	0.0581807	0.139685	0.000200551	0.000195237
			Citrus, other	0.64	1	0.01	0	0.317	0.20288		68.8513	2.47131	28.6774	0.139685	0.00501379	0.0581807	0.139685	0.000200551	0.000195237
			Bananas	6.54	11	0.14	0.04	0.678	4.43412		79.4125	3.10136	17.4861	3.52125	0.137518	0.775356	3.52125	0.00550071	0.00260187
			Plantains	0	0	0	0	0.6632	0		68.8513	2.47131	28.6774	0	0	0	0	0	0
			Apples	5.36	8	0.05	0.03	0.357	1.91352		72.4477	2.06109	25.4912	1.3863	0.0394395	0.487779	1.3863	0.00157758	0.00163684
			Pineapples	1.5	2	0.02	0.01	0.6632	0.9948		68.8513	2.47131	28.6774	0.684932	0.0245846	0.285283	0.684932	0.000983382	0.000957325
			Dates	0.01	0	0	0	0.6632	0.006632		68.8513	2.47131	28.6774	0.00456622	0.000163897	0.00190189	0.00456622	6.55588e-06	6.38217e-06
			Grapes (excluding wine)	1.25	3	0.03	0.01	1.214	1.5175		68.8513	2.47131	28.6774	1.04482	0.0375021	0.43518	1.04482	0.00150008	0.00146033
			Fruits, other	10.98	15	0.21	0.24	0.75	8.235		68.8513	2.47131	28.6774	5.6699	0.203512	2.36159	5.6699	0.00814048	0.00792478
	Vegetables		Cassava	0.02	0	0	0	0.987	0.01974	77.4606	83.6105	0.362596	16.0269	0.0165047	7.15765e-05	0.00316372	0.0165047	2.86306e-06	1.06165e-05	49.2865	0.0750053	0.0882515
			Potatoes	18.51	37	0.61	0.04	0.37	6.8487		59.711	1.6649	38.6241	4.08943	0.114024	2.64525	4.08943	0.00456097	0.00887668
			Sweet potatoes	3.75	15	0.11	0.03	0.365	1.36875		65.672	2.57696	31.751	0.898886	0.0352722	0.434592	0.898886	0.00141089	0.00145836
			Yams	1.02	3	0.05	0	0.365	0.3723		65.672	2.57696	31.751	0.244497	0.00959403	0.118209	0.244497	0.000383761	0.000396675
			Roots, other	1.58	4	0.08	0.01	0.365	0.5767		65.672	2.57696	31.751	0.378731	0.0148613	0.183108	0.378731	0.000594454	0.000614457
			Tomatoes	6.95	6	0.29	0.07	1.427	9.91765		53.5199	4.20609	42.274	5.30792	0.417145	4.19258	5.30792	0.0166858	0.0140691
			Onions	10.62	11	0.44	0.06	0.395	4.1949		71.3251	1.22109	27.4538	2.99202	0.0512236	1.15166	2.99202	0.00204894	0.00386463
			Vegetables, other	75.35	54	2.8	0.49	0.455	34.2843		65.672	2.57696	31.751	22.5152	0.883493	10.8856	22.5152	0.0353397	0.0365289
			Aquatic plants	0.92	1	0.1	0.01	0	0		65.672	2.57696	31.751	0	0	0	0	0	0
			Beans	0.96	9	0.53	0.03	1.61	1.5456		75.1226	5.04344	19.834	1.16109	0.0779514	0.306554	1.16109	0.00311806	0.00102871
			Peas	0.11	1	0.07	0	0.896	0.09856		66.4257	5.15877	28.4155	0.0654692	0.00508449	0.0280063	0.0654692	0.000203379	9.3981e-05
			Pulses, other	0.37	3	0.22	0.02	1.61	0.5957		65.672	2.57696	31.751	0.391208	0.015351	0.189141	0.391208	0.000614039	0.000634701
			Nuts	0.95	14	0.37	1.18	0.278	0.2641		62.5618	3.79852	33.6397	0.165226	0.0100319	0.0888423	0.165226	0.000401275	0.000298129
			Soybeans	7.94	92	8.23	3.66	1.8925	15.0265		63.3478	1.20151	35.4507	9.51893	0.180544	5.32698	9.51893	0.00722175	0.0178758
			Groundnuts (shelled equivalents)	0.94	12	0.54	1.02	2.497	2.34718		65.672	2.57696	31.751	1.54144	0.060486	0.745254	1.54144	0.00241944	0.00250085
	Meat	Ruminant	Bovine meat	9.59	31	3.79	1.63	42.8	410.452	414.114	10.5	73	16.5	43.0975	299.63	67.7246	43.0975	11.9852	0.227264	43.8409	12.0672	0.230176
			Mutton and goat meat	0.15	1	0.05	0.09	24.415	3.66225		20.3	56	23.7	0.743437	2.05086	0.867953	0.743437	0.0820344	0.00291259
		Non-ruminant	Pig meat	21.45	100	6.03	8.16	7.282	156.199	330.186	47.5051	28.439	24.0559	74.2024	44.4215	37.575	74.2024	1.77686	0.126091	165.291	2.5557	0.338936
			Poultry meat	18.78	68	7.39	4.01	6.092	114.408		53.86	5.83151	40.3085	61.62	6.6717	46.1161	61.62	0.266868	0.154752
			Meat, other	0.1	0	0.07	0.01	6.687	0.6687		49.4604	21.4829	29.0567	0.330742	0.143656	0.194302	0.330742	0.00574624	0.00065202
			Offals, edible	2.19	7	1.1	0.18	26.9	58.911		49.4604	21.4829	29.0567	29.1376	12.6558	17.1176	29.1376	0.506231	0.0574416
	Seafood		Freshwater fish	5.08	11	1.66	0.41	4.005	20.3454	214.028	49.4604	21.4829	29.0567	10.0629	4.37078	5.9117	10.0629	0.174831	0.0198379	199.964	0.689879	0.0575933
			Demersal fish	6.59	36	3.12	2.52	4.005	26.3929		78.6427	5.32556	16.0317	20.7561	1.40557	4.23124	20.7561	0.0562229	0.0141988
			Pelagic fish	13.9	52	7.3	2.18	4.005	55.6695		91.6865	7.21239	1.10113	51.0414	4.0151	0.612995	51.0414	0.160604	0.00205703
			Marine fish, other	5.15	14	2.12	0.44	4.005	20.6258		89.095	4.66193	6.24304	18.3765	0.961558	1.28767	18.3765	0.0384623	0.00432105
			Crustaceans	6.1	4	0.77	0.04	7.3405	44.777		89.095	4.66193	6.24304	39.8941	2.08748	2.79545	39.8941	0.083499	0.0093807
			Cephalopods	3.13	7	1.21	0.1	7.3405	22.9758		89.095	4.66193	6.24304	20.4703	1.07111	1.43439	20.4703	0.0428446	0.00481338
			Molluscs, other	5.63	3	0.44	0.05	7.3405	41.327		90.3737	7.81574	1.81055	37.3488	3.23001	0.748245	37.3488	0.1292	0.00251089
			Aquatic animals, others	0.34	0	0.01	0	6.6476	2.26018		89.095	4.66193	6.24304	2.01371	0.105368	0.141104	2.01371	0.00421473	0.000473504
	Dairy		Cream	0	0	0	0	2.781	0	173.02	24.1	56.7	19.2	0	0	0	0	0	0	38.6141	4.05431	0.110901
			Butter, ghee	0.61	12	0.01	1.35	2.781	1.69641		24.1	56.7	19.2	0.408835	0.961864	0.325711	0.408835	0.0384746	0.00109299
			Milk (excluding butter) *includes cheese	47.59	119	7.2	6.35	3.6	171.324		22.3	58.6	19.1	38.2053	100.396	32.7229	38.2053	4.01583	0.109808
	Eggs		Eggs	19.84	79	6.24	5.54	4.507	89.4189	89.4189	41.5	6.5	52	37.1088	5.81223	46.4978	37.1088	0.232489	0.156033	37.1088	0.232489	0.156033
	Oils		Oilcrops, other	0	0	0	0	1.313	0	82.5486	61.4	13	25.6	0	0	0	0	0	0	52.3694	0.319854	0.0744276
			Soybean oil	3.4	82	0	9.33	6.117	20.7978		61.4	13	25.6	12.7698	2.70371	5.32424	12.7698	0.108149	0.0178666
			Groundnut oil	0.01	0	0	0.02	5.752	0.05752		61.4	13	25.6	0.0353173	0.0074776	0.0147251	0.0353173	0.000299104	4.94132e-05
			Sunflowerseed oil	0.15	4	0	0.4	3.607	0.54105		61.4	13	25.6	0.332205	0.0703365	0.138509	0.332205	0.00281346	0.000464795
			Rape and mustard oil	6.64	161	0	18.2	3.828	25.4179		65.1	3.3	31.6	16.5471	0.838791	8.03206	16.5471	0.0335517	0.0269532
			Cottonseed oil	0	0	0	0	5.752	0		61.4	13	25.6	0	0	0	0	0	0
			Palmkernel oil	0	0	0	0	5.752	0		56.142	28.9894	14.8685	0	0	0	0	0	0
			Sesame seed oil	0	0	0	0	5.752	0		61.4	13	25.6	0	0	0	0	0	0
			Palm oil	0.9	22	0	2.46	7.605	6.8445		61.4923	12.9177	25.59	4.20884	0.884152	1.75151	4.20884	0.0353661	0.00587754
			Coconut oil	0.25	6	0	0.7	5.752	1.438		61.4	13	25.6	0.882932	0.18694	0.368128	0.882932	0.0074776	0.00123533
			Olive Oil	0.44	11	0	1.2	5.944	2.61536		89.1721	3.20831	7.61958	2.33217	0.0839088	0.199279	2.33217	0.00335635	0.000668723
			Rice bran oil	0.17	4	0	0.47	5.752	0.97784		61.4	13	25.6	0.600394	0.127119	0.250327	0.600394	0.00508477	0.000840024
			Maize germ oil	0.63	15	0	1.72	5.752	3.62376		61.4	13	25.6	2.22499	0.471089	0.927683	2.22499	0.0188436	0.00311303
			Oilcrops oil, other	3.05	60	0.05	6.78	5.752	17.5436		61.4	13	25.6	10.7718	2.28067	4.49116	10.7718	0.0912267	0.015071
			Fats, animals, raw	0.02	12	0	1.33	6.733	0.13466		61.4	13	25.6	0.0826812	0.0175058	0.034473	0.0826812	0.000700232	0.000115681
			Fish, body oil	0.29	7	0	0.78	6.733	1.95257		61.4	13	25.6	1.19888	0.253834	0.499858	1.19888	0.0101534	0.00167738
			Fish, liver oil	0	0	0	0	6.733	0		61.4	13	25.6	0	0	0	0	0	0
			Sunflower seed	0.01	0	0	0.01	1.313	0.01313		61.4	13	25.6	0.00806182	0.0017069	0.00336128	0.00806182	6.8276e-05	1.12795e-05
			Rape and mustardseed	0	1	0	0	1.313	0		65.1	3.3	31.6	0	0	0	0	0	0
			Sesame seed	0.4	6	0.19	0.57	1.313	0.5252		61.4923	12.9177	25.59	0.322958	0.0678438	0.134399	0.322958	0.00271375	0.000451002
			Palm kernels	0	0	0	0	1.313	0		56.142	28.9894	14.8685	0	0	0	0	0	0
			Olives (including preserved)	0.03	0	0	0.01	1.313	0.03939		89.1721	3.20831	7.61958	0.0351249	0.00126375	0.00300135	0.0351249	5.05501e-05	1.00717e-05
			Coconuts (including copra)	0.02	0	0	0.04	1.313	0.02626		61.4923	12.9177	25.59	0.0161479	0	0.00671993	0.0161479	0	2.25501e-05
	Beverages		Coffee	3.59	5	0.65	0	16.477	59.1524	118.527	53.6	0	46.4	31.7057	0	27.4467	31.7057	0	0.0921031	82.4291	0.0368889	0.118157
			Wine	2.8	5	0	0	1.585	4.438		79.6583	3.35563	17.7687	3.53523	0.148923	0.788577	3.53523	0.00595691	0.00264623
			Beer	22.22	26	0.3	0	1.109	24.642		95	0	5	23.4099	0	1.2321	23.4099	0	0.00413456
			Beverages, fermented	5.99	19	0.04	0	1.347	8.06853		82	3	15	6.61619	0.242056	1.21028	6.61619	0.00968224	0.00406134
			Beverages, alcoholic	8.76	71	0	0	1.347	11.7997		82	3	15	9.67577	0.353992	1.76996	9.67577	0.0141597	0.00593946
			Tea (including mate)	0.86	1	0.23	0	12.124	10.4266		71.8	1.7	26.5	7.48633	0.177253	2.76306	7.48633	0.00709012	0.00927201
	Other		Sugar cane	0	0	0	0	2.672	0	61.8871	74.1	1.1	24.8	0	0	0	0	0	0	32.4574	0.595388	0.0489653
			Sugar (non-centrifugal)	0.06	1	0	0	0.97	0.0582		59.6	16.5	24	0.0346872	0.009603	0.013968	0.0346872	0.00038412	4.68725e-05
			Sugar beet	0	0	0	0	1.536	0		59.6	16.5	24	0	0	0	0	0	0
			Sugar (raw equivalent)	15.68	159	0	0	0.97	15.2096		30.4914	47.2261	22.2824	4.63762	7.18291	3.38907	4.63762	0.287316	0.0113727
			Sweeteners, other	9.91	83	0.08	0	0.97	9.6127		59.6	16.5	24	5.72917	1.5861	2.30705	5.72917	0.0634438	0.00774177
			Honey	0.32	3	0	0	0.97	0.3104		59.6	16.5	24	0.184998	0.051216	0.074496	0.184998	0.00204864	0.000249987
			Cocoa beans	0	17	0.31	1.46	18.681	0		59.6	16.5	24	0	0	0	0	0	0
			Pepper	0.07	1	0.02	0	12.124	0.84868		59.6	16.5	24	0.505813	0.140032	0.203683	0.505813	0.00560129	0.000683501
			Pimento	0.1	1	0.03	0.05	12.124	1.2124		59.6	16.5	24	0.72259	0.200046	0.290976	0.72259	0.00800184	0.00097643
			Cloves	0	0	0	0	12.124	0		59.6	16.5	24	0	0	0	0	0	0
			Spices, other	1	9	0.26	0.19	12.124	12.124		59.6	16.5	24	7.2259	2.00046	2.90976	7.2259	0.0800184	0.0097643
			Infant food	0	0	0	0	2.781	0		24.6	56.4	19	0	0	0	0	0	0
			Miscellaneous	3.29	4	0.11	0.05	6.84227	22.5111		59.6	16.5	24	13.4166	3.71433	5.40266	13.4166	0.148573	0.0181297
Republic of Korea	Grain products (non-rice)		Wheat	51.37	401	12.02	1.59	1.4	71.918	88.2488	57.9	1.8	40.3	41.6405	1.29452	28.983	41.6405	0.051781	0.0972582	53.1113	0.0650727	0.112479	51225000	5.49931e+10	2.14517e+09	8.60889e+07
			Barley	0.88	8	0.24	0.05	1.313	1.15544		54.569	1.91155	43.5195	0.630512	0.0220869	0.502842	0.630512	0.000883474	0.00168739
			Maize	14.65	86	0.4	0.18	0.988	14.4742		71.9	2.05597	26.1	10.4069	0.297586	3.77777	10.4069	0.0119034	0.0126771
			Millet	0.19	1	0.04	0.01	1.313	0.24947		61.8	1.8	36.4	0.154172	0.00449046	0.0908071	0.154172	0.000179618	0.000304722
			Rye	0	0	0	0	1.4	0		73.3007	1.65211	25.0472	0	0	0	0	0	0
			Oats	0.02	0	0.01	0	1.575	0.0315		61.8	1.8	36.4	0.019467	0.000567	0.011466	0.019467	2.268e-05	3.84765e-05
			Sorghum	0	0	0	0	1.313	0		61.8	1.8	36.4	0	0	0	0	0	0
			Cereals, other	0.32	3	0.09	0.01	1.313	0.42016		61.8	1.8	36.4	0.259659	0.00756288	0.152938	0.259659	0.000302515	0.000513216
	Rice		Rice (milled equivalent)	119.47	885	15.77	2.14	3.839	458.645	458.645	22.2	71.8	6	101.819	329.307	27.5187	101.819	13.1723	0.0923447	101.819	13.1723	0.0923447
	Fruit		Oranges, mandarines	13.89	12	0.19	0.04	0.317	4.40313	32.6493	56.9055	1.22138	41.8731	2.50562	0.0537789	1.84373	2.50562	0.00215116	0.00618701	22.5293	0.0312091	0.0313416
			Lemons, limes	0.37	0	0.01	0	0.317	0.11729		56.3759	0	43.6241	0.0661233	0	0.0511667	0.0661233	0	0.0001717
			Grapefruit	0.49	0	0.01	0	0.317	0.15533		68.8513	2.47131	28.6774	0.106947	0.00383868	0.0445446	0.106947	0.000153547	0.000149479
			Citrus, other	0.02	0	0	0	0.317	0.00634		68.8513	2.47131	28.6774	0.00436517	0.000156681	0.00181815	0.00436517	6.26723e-06	6.10117e-06
			Bananas	7.93	14	0.17	0.04	0.678	5.37654		79.4125	3.10136	17.4861	4.26965	0.166746	0.940149	4.26965	0.00666982	0.00315486
			Plantains	0	0	0	0	0.6632	0		68.8513	2.47131	28.6774	0	0	0	0	0	0
			Apples	1.76	5	0.05	0.02	0.357	0.62832		72.4477	2.06109	25.4912	0.455204	0.0129503	0.160166	0.455204	0.000518011	0.00053747
			Pineapples	1.87	2	0.01	0.01	0.6632	1.24018		68.8513	2.47131	28.6774	0.853883	0.0306487	0.355653	0.853883	0.00122595	0.00119347
			Dates	0.01	0	0	0	0.6632	0.006632		68.8513	2.47131	28.6774	0.00456622	0.000163897	0.00190189	0.00456622	6.55588e-06	6.38217e-06
			Grapes (excluding wine)	4.43	5	0.05	0.02	1.214	5.37802		68.8513	2.47131	28.6774	3.70284	0.132907	1.54228	3.70284	0.00531629	0.00517543
			Fruits, other	20.45	27	0.32	0.23	0.75	15.3375		68.8513	2.47131	28.6774	10.5601	0.379037	4.3984	10.5601	0.0151615	0.0147597
	Vegetables		Cassava	0.04	0	0	0	0.987	0.03948	118.328	83.6105	0.362596	16.0269	0.0330094	0.000143153	0.00632744	0.0330094	5.72612e-06	2.1233e-05	76.7428	0.117268	0.12971
			Potatoes	10.69	21	0.49	0.03	0.37	3.9553		59.711	1.6649	38.6241	2.36175	0.0658519	1.5277	2.36175	0.00263408	0.00512651
			Sweet potatoes	3.87	11	0.11	0.03	0.365	1.41255		65.672	2.57696	31.751	0.92765	0.0364009	0.448499	0.92765	0.00145604	0.00150503
			Yams	0	0	0	0	0.365	0		65.672	2.57696	31.751	0	0	0	0	0	0
			Roots, other	0.44	3	0.06	0.01	0.365	0.1606		65.672	2.57696	31.751	0.105469	0.0041386	0.0509921	0.105469	0.000165544	0.000171115
			Tomatoes	7.21	5	0.26	0.07	1.427	10.2887		53.5199	4.20609	42.274	5.50649	0.43275	4.34943	5.50649	0.01731	0.0145954
			Onions	28.32	29	1.16	0.16	0.395	11.1864		71.3251	1.22109	27.4538	7.97871	0.136596	3.07109	7.97871	0.00546385	0.0103057
			Vegetables, other	165.01	134	7.18	1.31	0.455	75.0795		65.672	2.57696	31.751	49.3063	1.93477	23.8385	49.3063	0.0773909	0.0799951
			Aquatic plants	33.43	34	2.55	0.14	0	0		65.672	2.57696	31.751	0	0	0	0	0	0
			Beans	1.01	9	0.59	0.04	1.61	1.6261		75.1226	5.04344	19.834	1.22157	0.0820114	0.322521	1.22157	0.00328046	0.00108228
			Peas	0.07	1	0.04	0	0.896	0.06272		66.4257	5.15877	28.4155	0.0416622	0.00323558	0.0178222	0.0416622	0.000129423	5.98061e-05
			Pulses, other	0.25	2	0.15	0.02	1.61	0.4025		65.672	2.57696	31.751	0.26433	0.0103723	0.127798	0.26433	0.000414891	0.000428852
			Nuts	2.74	33	0.76	2.69	0.278	0.76172		62.5618	3.79852	33.6397	0.476546	0.028934	0.25624	0.476546	0.00115736	0.000859866
			Soybeans	5.67	44	4.09	1.84	1.8925	10.7305		63.3478	1.20151	35.4507	6.79752	0.128927	3.80403	6.79752	0.00515709	0.0127652
			Groundnuts (shelled equivalents)	1.05	12	0.53	0.98	2.497	2.62185		65.672	2.57696	31.751	1.72182	0.0675641	0.832464	1.72182	0.00270256	0.0027935
	Meat	Ruminant	Bovine meat	16.53	74	6.08	5.27	42.8	707.484	711.635	10.5	73	16.5	74.2858	516.463	116.735	74.2858	20.6585	0.391728	75.1284	20.7515	0.395029
			Mutton and goat meat	0.17	1	0.06	0.07	24.415	4.15055		20.3	56	23.7	0.842562	2.32431	0.98368	0.842562	0.0929723	0.00330094
		Non-ruminant	Pig meat	37.33	175	10.42	14.39	7.282	271.837	508.339	47.5051	28.439	24.0559	129.136	77.3079	65.3928	129.136	3.09232	0.219439	250.644	4.47968	0.488938
			Poultry meat	16.91	63	5.78	4.26	6.092	103.016		53.86	5.83151	40.3085	55.4843	6.00738	41.5241	55.4843	0.240295	0.139343
			Meat, other	0.13	1	0.08	0.05	6.687	0.86931		49.4604	21.4829	29.0567	0.429964	0.186753	0.252593	0.429964	0.00747011	0.000847627
			Offals, edible	4.93	15	2.47	0.44	26.9	132.617		49.4604	21.4829	29.0567	65.5929	28.49	38.5341	65.5929	1.1396	0.129309
	Seafood		Freshwater fish	1.74	3	0.5	0.12	4.005	6.9687	289.484	49.4604	21.4829	29.0567	3.44675	1.49708	2.02487	3.44675	0.0598831	0.00679488	255.693	0.770605	0.0721265
			Demersal fish	19.37	44	5.65	2.24	4.005	77.5769		78.6427	5.32556	16.0317	61.0086	4.1314	12.4369	61.0086	0.165256	0.0417345
			Pelagic fish	14.69	35	4.83	1.54	4.005	58.8334		91.6865	7.21239	1.10113	53.9423	4.2433	0.647834	53.9423	0.169732	0.00217394
			Marine fish, other	0.92	2	0.26	0.06	4.005	3.6846		89.095	4.66193	6.24304	3.2828	0.171774	0.230031	3.2828	0.00687094	0.000771916
			Crustaceans	3.16	7	1.39	0.07	7.3405	23.196		89.095	4.66193	6.24304	20.6665	1.08138	1.44813	20.6665	0.0432552	0.00485951
			Cephalopods	7.07	14	2.6	0.22	7.3405	51.8973		89.095	4.66193	6.24304	46.2379	2.41942	3.23997	46.2379	0.0967767	0.0108724
			Molluscs, other	9.75	7	1.04	0.12	7.3405	71.5699		90.3737	7.81574	1.81055	64.6804	5.59371	1.29581	64.6804	0.223749	0.00434834
			Aquatic animals, others	0.41	0	0.04	0	6.6476	2.72552		89.095	4.66193	6.24304	2.4283	0.127062	0.170155	2.4283	0.00508247	0.00057099
	Dairy		Cream	0.48	3	0.04	0.26	2.781	1.33488	45.2877	24.1	56.7	19.2	0.321706	0.756877	0.256297	0.321706	0.0302751	0.000860057	10.2158	1.05662	0.0290484
			Butter, ghee	1.85	36	0.05	4.11	2.781	5.14485		24.1	56.7	19.2	1.23991	2.91713	0.987811	1.23991	0.116685	0.0033148
			Milk (excluding butter) *includes cheese	10.78	50	3.51	2.69	3.6	38.808		22.3	58.6	19.1	8.65418	22.7415	7.41233	8.65418	0.90966	0.0248736
	Eggs		Eggs	12.93	52	4.08	3.63	4.507	58.2755	58.2755	41.5	6.5	52	24.1843	3.78791	30.3033	24.1843	0.151516	0.101689	24.1843	0.151516	0.101689
	Oils		Oilcrops, other	2.59	7	0.66	0.28	1.313	1.22109	135.24	61.4	13	25.6	0.749749	0.158742	0.312599	0.749749	0.00634967	0.00104899	83.7429	0.671865	0.116392
			Soybean oil	8.97	217	0	24.58	6.117	54.8695		61.4	13	25.6	33.6899	7.13303	14.0466	33.6899	0.285321	0.0471362
			Groundnut oil	0.03	1	0	0.07	5.752	0.17256		61.4	13	25.6	0.105952	0.0224328	0.0441754	0.105952	0.000897312	0.000148239
			Sunflowerseed oil	0.42	10	0	1.14	3.607	1.51494		61.4	13	25.6	0.930173	0.196942	0.387825	0.930173	0.00787769	0.00130142
			Rape and mustard oil	1.98	48	0	5.43	3.828	7.57944		65.1	3.3	31.6	4.93422	0.250122	2.3951	4.93422	0.0100049	0.00803726
			Cottonseed oil	0.58	14	0	1.58	5.752	3.33616		61.4	13	25.6	2.0484	0.433701	0.854057	2.0484	0.017348	0.00286596
			Palmkernel oil	0.16	4	0	0.44	5.752	0.92032		56.142	28.9894	14.8685	0.516686	0.266796	0.136838	0.516686	0.0106718	0.000459188
			Sesame seed oil	0.57	14	0	1.56	5.752	3.27864		61.4	13	25.6	2.01308	0.426223	0.839332	2.01308	0.0170489	0.00281655
			Palm oil	3.66	89	0	10.02	7.605	27.8343		61.4923	12.9177	25.59	17.116	3.59555	7.12279	17.116	0.143822	0.023902
			Coconut oil	1.11	27	0	3.04	5.752	6.38472		61.4	13	25.6	3.92022	0.830014	1.63449	3.92022	0.0332005	0.00548486
			Olive Oil	0.26	6	0	0.7	5.944	1.54544		89.1721	3.20831	7.61958	1.3781	0.0495825	0.117756	1.3781	0.0019833	0.000395155
			Rice bran oil	0.35	9	0	0.96	5.752	2.0132		61.4	13	25.6	1.2361	0.261716	0.515379	1.2361	0.0104686	0.00172946
			Maize germ oil	0.03	1	0	0.08	5.752	0.17256		61.4	13	25.6	0.105952	0.0224328	0.0441754	0.105952	0.000897312	0.000148239
			Oilcrops oil, other	0.93	22	0	2.52	5.752	5.34936		61.4	13	25.6	3.28451	0.695417	1.36944	3.28451	0.0278167	0.00459542
			Fats, animals, raw	2.71	54	0.29	5.86	6.733	18.2464		61.4	13	25.6	11.2033	2.37204	4.67109	11.2033	0.0948814	0.0156748
			Fish, body oil	0	0	0	0	6.733	0		61.4	13	25.6	0	0	0	0	0	0
			Fish, liver oil	0	0	0	0	6.733	0		61.4	13	25.6	0	0	0	0	0	0
			Sunflower seed	0.05	0	0.02	0.04	1.313	0.06565		61.4	13	25.6	0.0403091	0.0085345	0.0168064	0.0403091	0.00034138	5.63973e-05
			Rape and mustardseed	0	1	0	0	1.313	0		65.1	3.3	31.6	0	0	0	0	0	0
			Sesame seed	0.42	7	0.2	0.6	1.313	0.55146		61.4923	12.9177	25.59	0.339105	0.071236	0.141119	0.339105	0.00284944	0.000473552
			Palm kernels	0	0	0	0	1.313	0		56.142	28.9894	14.8685	0	0	0	0	0	0
			Olives (including preserved)	0.05	0	0	0.01	1.313	0.06565		89.1721	3.20831	7.61958	0.0585415	0.00210625	0.00500225	0.0585415	8.42502e-05	1.67861e-05
			Coconuts (including copra)	0.09	1	0.01	0.11	1.313	0.11817		61.4923	12.9177	25.59	0.0726655	0	0.0302397	0.0726655	0	0.000101475
	Beverages		Coffee	1.71	2	0.26	0	16.477	28.1757	123.599	53.6	0	46.4	15.1022	0	13.0735	15.1022	0	0.0438708	99.2551	0.0586794	0.0767964
			Wine	0.65	1	0	0	1.585	1.03025		79.6583	3.35563	17.7687	0.820679	0.0345714	0.183062	0.820679	0.00138285	0.000614304
			Beer	41.73	49	0.57	0	1.109	46.2786		95	0	5	43.9646	0	2.31393	43.9646	0	0.00776486
			Beverages, fermented	29.38	53	1.37	0.21	1.347	39.5749		82	3	15	32.4514	1.18725	5.93623	32.4514	0.0474898	0.0199202
			Beverages, alcoholic	5.71	35	0.08	0	1.347	7.69137		82	3	15	6.30692	0.230741	1.15371	6.30692	0.00922964	0.00387149
			Tea (including mate)	0.07	0	0.02	0	12.124	0.84868		71.8	1.7	26.5	0.609352	0.0144276	0.2249	0.609352	0.000577102	0.000754699
	Other		Sugar cane	0.01	0	0	0	2.672	0.02672	44.5929	74.1	1.1	24.8	0.0197995	0.00029392	0.00662656	0.0197995	1.17568e-05	2.22368e-05	20.4937	0.551181	0.0347091
			Sugar (non-centrifugal)	0	0	0	0	0.97	0		59.6	16.5	24	0	0	0	0	0	0
			Sugar beet	0	0	0	0	1.536	0		59.6	16.5	24	0	0	0	0	0	0
			Sugar (raw equivalent)	21.56	210	0	0	0.97	20.9132		30.4914	47.2261	22.2824	6.37673	9.8765	4.65997	6.37673	0.39506	0.0156375
			Sweeteners, other	18.01	152	0.12	0	0.97	17.4697		59.6	16.5	24	10.4119	2.8825	4.19273	10.4119	0.1153	0.0140696
			Honey	0.5	4	0	0	0.97	0.485		59.6	16.5	24	0.28906	0.080025	0.1164	0.28906	0.003201	0.000390604
			Cocoa beans	0	6	0.17	0.47	18.681	0		59.6	16.5	24	0	0	0	0	0	0
			Pepper	0.1	1	0.03	0.01	12.124	1.2124		59.6	16.5	24	0.72259	0.200046	0.290976	0.72259	0.00800184	0.00097643
			Pimento	0.02	0	0.01	0.01	12.124	0.24248		59.6	16.5	24	0.144518	0.0400092	0.0581952	0.144518	0.00160037	0.000195286
			Cloves	0	0	0	0	12.124	0		59.6	16.5	24	0	0	0	0	0	0
			Spices, other	0.35	3	0.09	0.07	12.124	4.2434		59.6	16.5	24	2.52907	0.700161	1.01842	2.52907	0.0280064	0.0034175
			Infant food	0	0	0	0	2.781	0		24.6	56.4	19	0	0	0	0	0	0
			Miscellaneous	0	0	0	0	6.84227	0		59.6	16.5	24	0	0	0	0	0	0

## Sheet: Latin America and Caribbean
Country	Food Group		Food Item	Consumption (kg food/capita/yr)	Caloric Consumption (kcal/capita/yr)	Protein Consumption (g/capita/day)	Fat Consumption (g/capita/day)	Greenhouse Gas Emissions (kg CO2e/kg)	Consumption Emissions (kg CO2e/capita/yr)	Food Group Consumption Emissions (kg CO2e/capita/yr)	Percent by Component Gas			Greenhouse Gas Emissions (kg CO2e/capita/yr)			Greenhouse Gas Emissions (kg gas/capita/yr)			Food Group Emission (kg gas/capita/yr)			Population (Year 2019)	Sum of Dietary Emissions (kg gas/yr)
														CO2	CH4	N2O	CO2	CH4	N2O	CO2	CH4	N2O		CO2	CH4	N2O
Antigua and Barbuda	Grain products (non-rice)		Wheat	67.86	574	15.18	5.02	1.4	95.004	98.1419	57.9	1.8	40.3	55.0073	1.71007	38.2866	55.0073	0.0684029	0.128479	57.0601	0.0707699	0.131923	97000	8.94791e+07	1.89811e+06	143264
			Barley	0	0	0	0	1.313	0		54.569	1.91155	43.5195	0	0	0	0	0	0
			Maize	1.09	13	0.29	0.31	0.988	1.07692		71.9	2.05597	26.1	0.774305	0.0221412	0.281076	0.774305	0.000885648	0.000943208
			Millet	0	0	0	0	1.313	0		61.8	1.8	36.4	0	0	0	0	0	0
			Rye	0.03	0	0	0	1.4	0.042		73.3007	1.65211	25.0472	0.0307863	0.000693888	0.0105198	0.0307863	2.77555e-05	3.53014e-05
			Oats	0.74	8	0.31	0.11	1.575	1.1655		61.8	1.8	36.4	0.720279	0.020979	0.424242	0.720279	0.00083916	0.00142363
			Sorghum	0	0	0	0	1.313	0		61.8	1.8	36.4	0	0	0	0	0	0
			Cereals, other	0.65	6	0.17	0.03	1.313	0.85345		61.8	1.8	36.4	0.527432	0.0153621	0.310656	0.527432	0.000614484	0.00104247
	Rice		Rice (milled equivalent)	12.42	121	2.51	0.57	3.839	47.6804	47.6804	22.2	71.8	6	10.585	34.2345	2.86082	10.585	1.36938	0.00960008	10.585	1.36938	0.00960008
	Fruit		Oranges, mandarines	2.84	6	0.09	0	0.317	0.90028	94.8105	56.9055	1.22138	41.8731	0.512309	0.0109958	0.376976	0.512309	0.000439833	0.00126502	66.2732	0.0942136	0.087859
			Lemons, limes	5.45	2	0.09	0.03	0.317	1.72765		56.3759	0	43.6241	0.973979	0	0.753671	0.973979	0	0.0025291
			Grapefruit	0.95	1	0	0	0.317	0.30115		68.8513	2.47131	28.6774	0.207346	0.00744234	0.086362	0.207346	0.000297694	0.000289806
			Citrus, other	0.43	1	0	0	0.317	0.13631		68.8513	2.47131	28.6774	0.0938512	0.00336864	0.0390902	0.0938512	0.000134745	0.000131175
			Bananas	17.41	29	0.34	0.14	0.678	11.804		79.4125	3.10136	17.4861	9.37384	0.366083	2.06406	9.37384	0.0146433	0.00692637
			Plantains	4.51	9	0.09	0.03	0.6632	2.99103		68.8513	2.47131	28.6774	2.05936	0.0739176	0.857751	2.05936	0.0029567	0.00287836
			Apples	5.56	8	0.03	0.03	0.357	1.98492		72.4477	2.06109	25.4912	1.43803	0.0409111	0.505979	1.43803	0.00163644	0.00169792
			Pineapples	6.21	7	0.06	0.03	0.6632	4.11847		68.8513	2.47131	28.6774	2.83562	0.10178	1.18107	2.83562	0.0040712	0.00396333
			Dates	0.08	0	0	0	0.6632	0.053056		68.8513	2.47131	28.6774	0.0365297	0.00131118	0.0152151	0.0365297	5.2447e-05	5.10574e-05
			Grapes (excluding wine)	3.3	6	0.06	0.03	1.214	4.0062		68.8513	2.47131	28.6774	2.75832	0.0990055	1.14887	2.75832	0.00396022	0.00385528
			Fruits, other	89.05	109	1.28	1.97	0.75	66.7875		68.8513	2.47131	28.6774	45.984	1.65052	19.1529	45.984	0.0660209	0.0642716
	Vegetables		Cassava	1.23	4	0.03	0	0.987	1.21401	53.1955	83.6105	0.362596	16.0269	1.01504	0.00440196	0.194569	1.01504	0.000176078	0.000652915	33.7803	0.060855	0.0600464
			Potatoes	11.08	23	0.51	0.03	0.37	4.0996		59.711	1.6649	38.6241	2.44791	0.0682543	1.58343	2.44791	0.00273017	0.00531354
			Sweet potatoes	3.46	8	0.09	0.03	0.365	1.2629		65.672	2.57696	31.751	0.829372	0.0325445	0.400984	0.829372	0.00130178	0.00134558
			Yams	1.32	3	0.06	0	0.365	0.4818		65.672	2.57696	31.751	0.316408	0.0124158	0.152976	0.316408	0.000496632	0.000513344
			Roots, other	1.41	4	0.06	0	0.365	0.51465		65.672	2.57696	31.751	0.337981	0.0132623	0.163407	0.337981	0.000530494	0.000548344
			Tomatoes	8.35	6	0.26	0.09	1.427	11.9154		53.5199	4.20609	42.274	6.37714	0.501174	5.03713	6.37714	0.020047	0.0169031
			Onions	6.54	7	0.23	0.03	0.395	2.5833		71.3251	1.22109	27.4538	1.84254	0.0315445	0.709215	1.84254	0.00126178	0.00237992
			Vegetables, other	53.96	45	2	0.31	0.455	24.5518		65.672	2.57696	31.751	16.1237	0.632691	7.79545	16.1237	0.0253076	0.0261592
			Aquatic plants	0	0	0	0	0	0		65.672	2.57696	31.751	0	0	0	0	0	0
			Beans	1.22	11	0.74	0.06	1.61	1.9642		75.1226	5.04344	19.834	1.47556	0.0990633	0.389579	1.47556	0.00396253	0.00130731
			Peas	0.58	5	0.34	0.03	0.896	0.51968		66.4257	5.15877	28.4155	0.345201	0.0268091	0.14767	0.345201	0.00107236	0.000495536
			Pulses, other	0.74	7	0.46	0.06	1.61	1.1914		65.672	2.57696	31.751	0.782416	0.0307019	0.378282	0.782416	0.00122808	0.0012694
			Nuts	0.34	5	0.14	0.4	0.278	0.09452		62.5618	3.79852	33.6397	0.0591334	0.00359036	0.0317962	0.0591334	0.000143614	0.000106699
			Soybeans	0.28	0	0.06	0	1.8925	0.5299		63.3478	1.20151	35.4507	0.33568	0.00636678	0.187853	0.33568	0.000254671	0.00063038
			Groundnuts (shelled equivalents)	0.91	13	0.6	1.11	2.497	2.27227		65.672	2.57696	31.751	1.49225	0.0585556	0.721469	1.49225	0.00234222	0.00242104
	Meat	Ruminant	Bovine meat	7.11	38	4.17	2.23	42.8	304.308	337.024	10.5	73	16.5	31.9523	222.145	50.2108	31.9523	8.88579	0.168493	38.5937	9.61863	0.194512
			Mutton and goat meat	1.34	6	0.51	0.43	24.415	32.7161		20.3	56	23.7	6.64137	18.321	7.75372	6.64137	0.732841	0.0260192
		Non-ruminant	Pig meat	7.55	55	2.94	4.62	7.282	54.9791	498.518	47.5051	28.439	24.0559	26.1179	15.6355	13.2257	26.1179	0.625421	0.0443816	260.943	2.23847	0.609441
			Poultry meat	57.64	248	18.89	18.72	6.092	351.143		53.86	5.83151	40.3085	189.126	20.4769	141.54	189.126	0.819078	0.474968
			Meat, other	0.14	1	0.09	0.06	6.687	0.93618		49.4604	21.4829	29.0567	0.463039	0.201118	0.272023	0.463039	0.00804474	0.000912829
			Offals, edible	3.4	10	1.68	0.29	26.9	91.46		49.4604	21.4829	29.0567	45.2365	19.6482	26.5752	45.2365	0.78593	0.0891787
	Seafood		Freshwater fish	1.18	3	0.37	0.12	4.005	4.7259	262.887	49.4604	21.4829	29.0567	2.33745	1.01526	1.37319	2.33745	0.0406104	0.00460802	236.689	0.639617	0.0501125
			Demersal fish	3.82	5	1.01	0.08	4.005	15.2991		78.6427	5.32556	16.0317	12.0316	0.814763	2.4527	12.0316	0.0325905	0.00823055
			Pelagic fish	10.74	26	3.11	1.3	4.005	43.0137		91.6865	7.21239	1.10113	39.4377	3.10231	0.473637	39.4377	0.124093	0.00158939
			Marine fish, other	25.42	45	8	1.1	4.005	101.807		89.095	4.66193	6.24304	90.7051	4.74618	6.35586	90.7051	0.189847	0.0213284
			Crustaceans	7.18	7	1.46	0.07	7.3405	52.7048		89.095	4.66193	6.24304	46.9573	2.45706	3.29038	46.9573	0.0982825	0.0110415
			Cephalopods	0.25	0	0.1	0.01	7.3405	1.83512		89.095	4.66193	6.24304	1.63501	0.0855523	0.114568	1.63501	0.00342209	0.000384455
			Molluscs, other	6.57	3	0.44	0.05	7.3405	48.2271		90.3737	7.81574	1.81055	43.5846	3.7693	0.873173	43.5846	0.150772	0.00293011
			Aquatic animals, others	0	0	0	0	6.6476	0		89.095	4.66193	6.24304	0	0	0	0	0	0
	Dairy		Cream	1.92	10	0.14	1	2.781	5.33952	170.349	24.1	56.7	19.2	1.28682	3.02751	1.02519	1.28682	0.1211	0.00344023	38.1641	3.98554	0.109216
			Butter, ghee	1.6	32	0.03	3.62	2.781	4.4496		24.1	56.7	19.2	1.07235	2.52292	0.854323	1.07235	0.100917	0.00286686
			Milk (excluding butter) *includes cheese	44.6	149	7.85	7.71	3.6	160.56		22.3	58.6	19.1	35.8049	94.0882	30.667	35.8049	3.76353	0.102909
	Eggs		Eggs	3.09	11	0.86	0.74	4.507	13.9266	13.9266	41.5	6.5	52	5.77955	0.905231	7.24185	5.77955	0.0362092	0.0243015	5.77955	0.0362092	0.0243015
	Oils		Oilcrops, other	0.06	1	0.06	0.03	1.313	0.07878	61.411	61.4	13	25.6	0.0483709	0.0102414	0.0201677	0.0483709	0.000409656	6.76768e-05	39.3344	0.291377	0.0494675
			Soybean oil	3.5	85	0	9.59	6.117	21.4095		61.4	13	25.6	13.1454	2.78324	5.48083	13.1454	0.111329	0.0183921
			Groundnut oil	0.09	2	0	0.26	5.752	0.51768		61.4	13	25.6	0.317856	0.0672984	0.132526	0.317856	0.00269194	0.000444718
			Sunflowerseed oil	0.04	1	0	0.11	3.607	0.14428		61.4	13	25.6	0.0885879	0.0187564	0.0369357	0.0885879	0.000750256	0.000123945
			Rape and mustard oil	0.23	5	0	0.63	3.828	0.88044		65.1	3.3	31.6	0.573166	0.0290545	0.278219	0.573166	0.00116218	0.000933621
			Cottonseed oil	0.08	2	0	0.23	5.752	0.46016		61.4	13	25.6	0.282538	0.0598208	0.117801	0.282538	0.00239283	0.000395305
			Palmkernel oil	0	0	0	0	5.752	0		56.142	28.9894	14.8685	0	0	0	0	0	0
			Sesame seed oil	0.05	1	0	0.14	5.752	0.2876		61.4	13	25.6	0.176586	0.037388	0.0736256	0.176586	0.00149552	0.000247066
			Palm oil	0	0	0	0	7.605	0		61.4923	12.9177	25.59	0	0	0	0	0	0
			Coconut oil	0.08	2	0	0.23	5.752	0.46016		61.4	13	25.6	0.282538	0.0598208	0.117801	0.282538	0.00239283	0.000395305
			Olive Oil	0.9	22	0	2.45	5.944	5.3496		89.1721	3.20831	7.61958	4.77035	0.171632	0.407617	4.77035	0.00686527	0.00136784
			Rice bran oil	0	0	0	0	5.752	0		61.4	13	25.6	0	0	0	0	0	0
			Maize germ oil	0.13	3	0	0.34	5.752	0.74776		61.4	13	25.6	0.459125	0.0972088	0.191427	0.459125	0.00388835	0.000642371
			Oilcrops oil, other	5.02	101	0.06	11.33	5.752	28.875		61.4	13	25.6	17.7293	3.75376	7.39201	17.7293	0.15015	0.0248054
			Fats, animals, raw	0.16	89	0.09	10.02	6.733	1.07728		61.4	13	25.6	0.66145	0.140046	0.275784	0.66145	0.00560186	0.000925449
			Fish, body oil	0	0	0	0	6.733	0		61.4	13	25.6	0	0	0	0	0	0
			Fish, liver oil	0.04	1	0	0.11	6.733	0.26932		61.4	13	25.6	0.165362	0.0350116	0.0689459	0.165362	0.00140046	0.000231362
			Sunflower seed	0.03	0	0	0.03	1.313	0.03939		61.4	13	25.6	0.0241855	0.0051207	0.0100838	0.0241855	0.000204828	3.38384e-05
			Rape and mustardseed	0	6	0	0	1.313	0		65.1	3.3	31.6	0	0	0	0	0	0
			Sesame seed	0.02	0	0	0.03	1.313	0.02626		61.4923	12.9177	25.59	0.0161479	0.00339219	0.00671993	0.0161479	0.000135688	2.25501e-05
			Palm kernels	0	0	0	0	1.313	0		56.142	28.9894	14.8685	0	0	0	0	0	0
			Olives (including preserved)	0.3	1	0	0.09	1.313	0.3939		89.1721	3.20831	7.61958	0.351249	0.0126375	0.0300135	0.351249	0.000505501	0.000100717
			Coconuts (including copra)	0.3	2	0.03	0.2	1.313	0.3939		61.4923	12.9177	25.59	0.242218	0	0.100799	0.242218	0	0.000338252
	Beverages		Coffee	0.84	3	0.11	0	16.477	13.8407	84.9491	53.6	0	46.4	7.4186	0	6.42208	7.4186	0	0.0215506	68.5481	0.0379491	0.0521337
			Wine	6.74	15	0	0	1.585	10.6829		79.6583	3.35563	17.7687	8.50981	0.358479	1.89822	8.50981	0.0143391	0.00636986
			Beer	31.25	31	0.26	0	1.109	34.6562		95	0	5	32.9234	0	1.73281	32.9234	0	0.00581481
			Beverages, fermented	0.56	1	0	0	1.347	0.75432		82	3	15	0.618542	0.0226296	0.113148	0.618542	0.000905184	0.000379691
			Beverages, alcoholic	8.13	66	0	0	1.347	10.9511		82	3	15	8.97991	0.328533	1.64267	8.97991	0.0131413	0.0055123
			Tea (including mate)	1.16	1	0.31	0	12.124	14.0638		71.8	1.7	26.5	10.0978	0.239085	3.72692	10.0978	0.00956341	0.0125064
	Other		Sugar cane	0	0	0	0	2.672	0	124.048	74.1	1.1	24.8	0	0	0	0	0	0	66.7144	1.12512	0.098338
			Sugar (non-centrifugal)	0	0	0	0	0.97	0		59.6	16.5	24	0	0	0	0	0	0
			Sugar beet	0	0	0	0	1.536	0		59.6	16.5	24	0	0	0	0	0	0
			Sugar (raw equivalent)	23.84	226	0	0	0.97	23.1248		30.4914	47.2261	22.2824	7.05108	10.921	5.15277	7.05108	0.436838	0.0172912
			Sweeteners, other	27.68	30	0	0	0.97	26.8496		59.6	16.5	24	16.0024	4.43018	6.4439	16.0024	0.177207	0.0216238
			Honey	0.36	3	0	0	0.97	0.3492		59.6	16.5	24	0.208123	0.057618	0.083808	0.208123	0.00230472	0.000281235
			Cocoa beans	0	21	0.26	1.88	18.681	0		59.6	16.5	24	0	0	0	0	0	0
			Pepper	0.46	3	0.14	0.03	12.124	5.57704		59.6	16.5	24	3.32392	0.920212	1.33849	3.32392	0.0368085	0.00449158
			Pimento	0.2	2	0.06	0.09	12.124	2.4248		59.6	16.5	24	1.44518	0.400092	0.581952	1.44518	0.0160037	0.00195286
			Cloves	0.07	1	0	0.03	12.124	0.84868		59.6	16.5	24	0.505813	0.140032	0.203683	0.505813	0.00560129	0.000683501
			Spices, other	1.28	12	0.37	0.51	12.124	15.5187		59.6	16.5	24	9.24916	2.56059	3.72449	9.24916	0.102424	0.0124983
			Infant food	0.5	5	0.2	0.03	2.781	1.3905		24.6	56.4	19	0.342063	0.784242	0.264195	0.342063	0.0313697	0.00088656
			Miscellaneous	7.01	8	0.23	0.09	6.84227	47.9643		59.6	16.5	24	28.5867	7.91411	11.5114	28.5867	0.316565	0.038629
Argentina	Grain products (non-rice)		Wheat	101.71	889	23.62	2.46	1.4	142.394	156.209	57.9	1.8	40.3	82.4461	2.56309	57.3848	82.4461	0.102524	0.192566	92.1471	0.11365	0.205459	44781000	4.92343e+10	4.03557e+09	1.35217e+08
			Barley	0	0	0	0	1.313	0		54.569	1.91155	43.5195	0	0	0	0	0	0
			Maize	11.66	90	2.04	0.28	0.988	11.5201		71.9	2.05597	26.1	8.28294	0.23685	3.00674	8.28294	0.00947399	0.0100897
			Millet	0	0	0	0	1.313	0		61.8	1.8	36.4	0	0	0	0	0	0
			Rye	0	0	0	0	1.4	0		73.3007	1.65211	25.0472	0	0	0	0	0	0
			Oats	0.84	5	0.2	0.08	1.575	1.323		61.8	1.8	36.4	0.817614	0.023814	0.481572	0.817614	0.00095256	0.00161601
			Sorghum	0	0	0	0	1.313	0		61.8	1.8	36.4	0	0	0	0	0	0
			Cereals, other	0.74	6	0.17	0.02	1.313	0.97162		61.8	1.8	36.4	0.600461	0.0174892	0.35367	0.600461	0.000699566	0.00118681
	Rice		Rice (milled equivalent)	12.79	90	1.82	0.26	3.839	49.1008	49.1008	22.2	71.8	6	10.9004	35.2544	2.94605	10.9004	1.41018	0.00988607	10.9004	1.41018	0.00988607
	Fruit		Oranges, mandarines	27.57	20	0.35	0.07	0.317	8.73969	37.573	56.9055	1.22138	41.8731	4.97336	0.106745	3.65958	4.97336	0.00426979	0.0122805	25.2276	0.0295055	0.0389523
			Lemons, limes	16.08	6	0.11	0.09	0.317	5.09736		56.3759	0	43.6241	2.87369	0	2.22367	2.87369	0	0.007462
			Grapefruit	2.28	1	0.01	0	0.317	0.72276		68.8513	2.47131	28.6774	0.497629	0.0178616	0.207269	0.497629	0.000714465	0.000695533
			Citrus, other	0.03	0	0	0	0.317	0.00951		68.8513	2.47131	28.6774	0.00654776	0.000235021	0.00272722	0.00654776	9.40085e-06	9.15175e-06
			Bananas	13.08	22	0.29	0.04	0.678	8.86824		79.4125	3.10136	17.4861	7.04249	0.275036	1.55071	7.04249	0.0110014	0.00520373
			Plantains	0.03	0	0	0	0.6632	0.019896		68.8513	2.47131	28.6774	0.0136986	0.000491691	0.00570566	0.0136986	1.96676e-05	1.91465e-05
			Apples	7.9	10	0.05	0.05	0.357	2.8203		72.4477	2.06109	25.4912	2.04324	0.058129	0.718927	2.04324	0.00232516	0.00241251
			Pineapples	0.8	1	0.01	0	0.6632	0.53056		68.8513	2.47131	28.6774	0.365297	0.0131118	0.152151	0.365297	0.00052447	0.000510574
			Dates	0.01	0	0	0	0.6632	0.006632		68.8513	2.47131	28.6774	0.00456622	0.000163897	0.00190189	0.00456622	6.55588e-06	6.38217e-06
			Grapes (excluding wine)	1.72	3	0.02	0.02	1.214	2.08808		68.8513	2.47131	28.6774	1.43767	0.0516029	0.598807	1.43767	0.00206411	0.00200942
			Fruits, other	11.56	15	0.15	0.15	0.75	8.67		68.8513	2.47131	28.6774	5.96941	0.214262	2.48633	5.96941	0.00857049	0.0083434
	Vegetables		Cassava	1.84	4	0.03	0.01	0.987	1.81608	66.6638	83.6105	0.362596	16.0269	1.51843	0.00658504	0.291062	1.51843	0.000263402	0.000976719	41.2231	0.0743548	0.0791336
			Potatoes	38.37	69	2.43	0.2	0.37	14.1969		59.711	1.6649	38.6241	8.47711	0.236364	5.48343	8.47711	0.00945458	0.0184008
			Sweet potatoes	7.16	17	0.2	0.04	0.365	2.6134		65.672	2.57696	31.751	1.71627	0.0673464	0.829781	1.71627	0.00269385	0.0027845
			Yams	0	0	0	0	0.365	0		65.672	2.57696	31.751	0	0	0	0	0	0
			Roots, other	0	0	0	0	0.365	0		65.672	2.57696	31.751	0	0	0	0	0	0
			Tomatoes	14.2	9	0.35	0.12	1.427	20.2634		53.5199	4.20609	42.274	10.845	0.852296	8.56614	10.845	0.0340918	0.0287454
			Onions	13.68	15	0.49	0.07	0.395	5.4036		71.3251	1.22109	27.4538	3.85412	0.0659829	1.48349	3.85412	0.00263932	0.00497817
			Vegetables, other	41.82	30	1.32	0.25	0.455	19.0281		65.672	2.57696	31.751	12.4961	0.490347	6.04162	12.4961	0.0196139	0.0202739
			Aquatic plants	0	0	0	0	0	0		65.672	2.57696	31.751	0	0	0	0	0	0
			Beans	0.78	7	0.47	0.03	1.61	1.2558		75.1226	5.04344	19.834	0.943389	0.0633355	0.249075	0.943389	0.00253342	0.000835824
			Peas	0.94	9	0.58	0.05	0.896	0.84224		66.4257	5.15877	28.4155	0.559464	0.0434492	0.239327	0.559464	0.00173797	0.00080311
			Pulses, other	0.63	6	0.4	0.03	1.61	1.0143		65.672	2.57696	31.751	0.666111	0.0261381	0.322051	0.666111	0.00104553	0.00108071
			Nuts	0.4	4	0.1	0.38	0.278	0.1112		62.5618	3.79852	33.6397	0.0695688	0.00422395	0.0374073	0.0695688	0.000168958	0.000125528
			Soybeans	0.01	0	0	0	1.8925	0.018925		63.3478	1.20151	35.4507	0.0119886	0.000227385	0.00670904	0.0119886	9.0954e-06	2.25136e-05
			Groundnuts (shelled equivalents)	0.04	0	0.02	0.04	2.497	0.09988		65.672	2.57696	31.751	0.0655932	0.00257387	0.0317129	0.0655932	0.000102955	0.000106419
	Meat	Ruminant	Bovine meat	55.44	346	27.24	23.68	42.8	2372.83	2403.84	10.5	73	16.5	249.147	1732.17	391.517	249.147	69.2867	1.31382	255.442	69.9813	1.33848
			Mutton and goat meat	1.27	8	0.46	0.63	24.415	31.007		20.3	56	23.7	6.29443	17.3639	7.34867	6.29443	0.694558	0.02466
		Non-ruminant	Pig meat	14.45	111	4.48	10.17	7.282	105.225	540.928	47.5051	28.439	24.0559	49.9872	29.925	25.3128	49.9872	1.197	0.0849422	277.348	3.2534	0.611562
			Poultry meat	44.25	190	14.18	14.5	6.092	269.571		53.86	5.83151	40.3085	145.191	15.7201	108.66	145.191	0.628803	0.364631
			Meat, other	1.11	3	0.57	0.09	6.687	7.42257		49.4604	21.4829	29.0567	3.67123	1.59458	2.15675	3.67123	0.0637833	0.00723743
			Offals, edible	5.9	17	2.95	0.45	26.9	158.71		49.4604	21.4829	29.0567	78.4986	34.0955	46.1159	78.4986	1.36382	0.154751
	Seafood		Freshwater fish	0.31	1	0.08	0.02	4.005	1.24155	36.7538	49.4604	21.4829	29.0567	0.614076	0.266721	0.360753	0.614076	0.0106688	0.00121058	32.3835	0.0948201	0.010877
			Demersal fish	2.84	3	0.63	0.06	4.005	11.3742		78.6427	5.32556	16.0317	8.94498	0.60574	1.82348	8.94498	0.0242296	0.00611905
			Pelagic fish	1.36	6	0.74	0.27	4.005	5.4468		91.6865	7.21239	1.10113	4.99398	0.392844	0.0599764	4.99398	0.0157138	0.000201263
			Marine fish, other	0.01	0	0	0	4.005	0.04005		89.095	4.66193	6.24304	0.0356826	0.0018671	0.00250034	0.0356826	7.46841e-05	8.39039e-06
			Crustaceans	1.42	2	0.36	0.02	7.3405	10.4235		89.095	4.66193	6.24304	9.28683	0.485937	0.650744	9.28683	0.0194375	0.0021837
			Cephalopods	0.53	1	0.21	0.01	7.3405	3.89046		89.095	4.66193	6.24304	3.46621	0.181371	0.242883	3.46621	0.00725483	0.000815045
			Molluscs, other	0.76	0	0.06	0.01	7.3405	5.57878		90.3737	7.81574	1.81055	5.04175	0.436023	0.101006	5.04175	0.0174409	0.000338948
			Aquatic animals, others	0	0	0	0	6.6476	0		89.095	4.66193	6.24304	0	0	0	0	0	0
	Dairy		Cream	0.08	0	0.01	0.04	2.781	0.22248	581.951	24.1	56.7	19.2	0.0536177	0.126146	0.0427162	0.0536177	0.00504585	0.000143343	129.81	13.6395	0.373002
			Butter, ghee	0.61	12	0.01	1.39	2.781	1.69641		24.1	56.7	19.2	0.408835	0.961864	0.325711	0.408835	0.0384746	0.00109299
			Milk (excluding butter) *includes cheese	161.12	221	12.66	14.06	3.6	580.032		22.3	58.6	19.1	129.347	339.899	110.786	129.347	13.596	0.371765
	Eggs		Eggs	16.07	58	4.4	3.83	4.507	72.4275	72.4275	41.5	6.5	52	30.0574	4.70779	37.6623	30.0574	0.188311	0.126384	30.0574	0.188311	0.126384
	Oils		Oilcrops, other	0	0	0	0	1.313	0	85.6451	61.4	13	25.6	0	0	0	0	0	0	53.3691	0.431205	0.0720999
			Soybean oil	2.65	68	0	7.67	6.117	16.2101		61.4	13	25.6	9.95297	2.10731	4.14977	9.95297	0.0842923	0.0139254
			Groundnut oil	0.09	2	0	0.25	5.752	0.51768		61.4	13	25.6	0.317856	0.0672984	0.132526	0.317856	0.00269194	0.000444718
			Sunflowerseed oil	10.84	263	0	29.7	3.607	39.0999		61.4	13	25.6	24.0073	5.08298	10.0096	24.0073	0.203319	0.0335892
			Rape and mustard oil	0.21	5	0	0.57	3.828	0.80388		65.1	3.3	31.6	0.523326	0.026528	0.254026	0.523326	0.00106112	0.000852437
			Cottonseed oil	0.11	3	0	0.31	5.752	0.63272		61.4	13	25.6	0.38849	0.0822536	0.161976	0.38849	0.00329014	0.000543545
			Palmkernel oil	0	0	0	0	5.752	0		56.142	28.9894	14.8685	0	0	0	0	0	0
			Sesame seed oil	0	0	0	0	5.752	0		61.4	13	25.6	0	0	0	0	0	0
			Palm oil	0	0	0	0	7.605	0		61.4923	12.9177	25.59	0	0	0	0	0	0
			Coconut oil	0.09	2	0	0.24	5.752	0.51768		61.4	13	25.6	0.317856	0.0672984	0.132526	0.317856	0.00269194	0.000444718
			Olive Oil	0.2	5	0	0.55	5.944	1.1888		89.1721	3.20831	7.61958	1.06008	0.0381404	0.0905816	1.06008	0.00152561	0.000303965
			Rice bran oil	0	0	0	0	5.752	0		61.4	13	25.6	0	0	0	0	0	0
			Maize germ oil	0.33	8	0	0.9	5.752	1.89816		61.4	13	25.6	1.16547	0.246761	0.485929	1.16547	0.00987043	0.00163063
			Oilcrops oil, other	0.33	7	0.01	0.73	5.752	1.89816		61.4	13	25.6	1.16547	0.246761	0.485929	1.16547	0.00987043	0.00163063
			Fats, animals, raw	3.16	64	0.01	7.1	6.733	21.2763		61.4	13	25.6	13.0636	2.76592	5.44673	13.0636	0.110637	0.0182776
			Fish, body oil	0	0	0	0	6.733	0		61.4	13	25.6	0	0	0	0	0	0
			Fish, liver oil	0	0	0	0	6.733	0		61.4	13	25.6	0	0	0	0	0	0
			Sunflower seed	0	0	0	0	1.313	0		61.4	13	25.6	0	0	0	0	0	0
			Rape and mustardseed	0	0	0	0	1.313	0		65.1	3.3	31.6	0	0	0	0	0	0
			Sesame seed	0	0	0	0	1.313	0		61.4923	12.9177	25.59	0	0	0	0	0	0
			Palm kernels	0	0	0	0	1.313	0		56.142	28.9894	14.8685	0	0	0	0	0	0
			Olives (including preserved)	1.16	4	0.04	0.4	1.313	1.52308		89.1721	3.20831	7.61958	1.35816	0.0488651	0.116052	1.35816	0.0019546	0.000389437
			Coconuts (including copra)	0.06	1	0.01	0.11	1.313	0.07878		61.4923	12.9177	25.59	0.0484436	0	0.0201598	0.0484436	0	6.76503e-05
	Beverages		Coffee	0.81	1	0.14	0	16.477	13.3464	171.432	53.6	0	46.4	7.15365	0	6.19272	7.15365	0	0.0207809	134.228	0.103465	0.117161
			Wine	23.92	45	0	0	1.585	37.9132		79.6583	3.35563	17.7687	30.201	1.27223	6.7367	30.201	0.0508891	0.0226064
			Beer	40.24	40	0.33	0	1.109	44.6262		95	0	5	42.3949	0	2.23131	42.3949	0	0.00748761
			Beverages, fermented	0	0	0	0	1.347	0		82	3	15	0	0	0	0	0	0
			Beverages, alcoholic	1.72	14	0	0	1.347	2.31684		82	3	15	1.89981	0.0695052	0.347526	1.89981	0.00278021	0.00116619
			Tea (including mate)	6.04	7	1.66	0	12.124	73.229		71.8	1.7	26.5	52.5784	1.24489	19.4057	52.5784	0.0497957	0.0651197
	Other		Sugar cane	0	0	0	0	2.672	0	48.1409	74.1	1.1	24.8	0	0	0	0	0	0	17.3103	0.798295	0.0365175
			Sugar (non-centrifugal)	0	0	0	0	0.97	0		59.6	16.5	24	0	0	0	0	0	0
			Sugar beet	0	0	0	0	1.536	0		59.6	16.5	24	0	0	0	0	0	0
			Sugar (raw equivalent)	40.31	391	0	0	0.97	39.1007		30.4914	47.2261	22.2824	11.9224	18.4658	8.71258	11.9224	0.73863	0.0292369
			Sweeteners, other	6.54	62	0.01	0	0.97	6.3438		59.6	16.5	24	3.7809	1.04673	1.52251	3.7809	0.0418691	0.0051091
			Honey	0.03	0	0	0	0.97	0.0291		59.6	16.5	24	0.0173436	0.0048015	0.006984	0.0173436	0.00019206	2.34362e-05
			Cocoa beans	0	7	0.21	0.58	18.681	0		59.6	16.5	24	0	0	0	0	0	0
			Pepper	0.03	0	0.01	0	12.124	0.36372		59.6	16.5	24	0.216777	0.0600138	0.0872928	0.216777	0.00240055	0.000292929
			Pimento	0.1	1	0.03	0.02	12.124	1.2124		59.6	16.5	24	0.72259	0.200046	0.290976	0.72259	0.00800184	0.00097643
			Cloves	0	0	0	0	12.124	0		59.6	16.5	24	0	0	0	0	0	0
			Spices, other	0.09	1	0.02	0.03	12.124	1.09116		59.6	16.5	24	0.650331	0.180041	0.261878	0.650331	0.00720166	0.000878787
			Infant food	0	0	0	0	2.781	0		24.6	56.4	19	0	0	0	0	0	0
			Miscellaneous	0	0	0	0	6.84227	0		59.6	16.5	24	0	0	0	0	0	0
Bahamas	Grain products (non-rice)		Wheat	31.42	305	7.21	5.98	1.4	43.988	68.8805	57.9	1.8	40.3	25.4691	0.791784	17.7272	25.4691	0.0316714	0.0594871	41.0554	0.0510181	0.0891105	389000	3.46451e+08	8.34523e+06	618539
			Barley	7.87	79	2.82	0.41	1.313	10.3333		54.569	1.91155	43.5195	5.63878	0.197527	4.497	5.63878	0.00790107	0.0150906
			Maize	9.52	83	1.88	0.26	0.988	9.40576		71.9	2.05597	26.1	6.76274	0.19338	2.4549	6.76274	0.0077352	0.00823793
			Millet	0	0	0	0	1.313	0		61.8	1.8	36.4	0	0	0	0	0	0
			Rye	0	0	0	0	1.4	0		73.3007	1.65211	25.0472	0	0	0	0	0	0
			Oats	2.28	24	1	0.39	1.575	3.591		61.8	1.8	36.4	2.21924	0.064638	1.30712	2.21924	0.00258552	0.00438632
			Sorghum	0	0	0	0	1.313	0		61.8	1.8	36.4	0	0	0	0	0	0
			Cereals, other	1.19	12	0.33	0.04	1.313	1.56247		61.8	1.8	36.4	0.965606	0.0281245	0.568739	0.965606	0.00112498	0.00190852
	Rice		Rice (milled equivalent)	19.66	196	3.88	0.34	3.839	75.4747	75.4747	22.2	71.8	6	16.7554	54.1909	4.52848	16.7554	2.16763	0.0151963	16.7554	2.16763	0.0151963
	Fruit		Oranges, mandarines	15.81	16	0.26	0.04	0.317	5.01177	72.2231	56.9055	1.22138	41.8731	2.85197	0.0612127	2.09859	2.85197	0.00244851	0.00704223	50.5661	0.0691999	0.066869
			Lemons, limes	12.49	10	0.21	0.16	0.317	3.95933		56.3759	0	43.6241	2.23211	0	1.72722	2.23211	0	0.00579604
			Grapefruit	56.48	34	0.46	0.16	0.317	17.9042		68.8513	2.47131	28.6774	12.3272	0.442467	5.13445	12.3272	0.0176987	0.0172297
			Citrus, other	0.88	3	0.04	0.01	0.317	0.27896		68.8513	2.47131	28.6774	0.192068	0.00689396	0.0799985	0.192068	0.000275758	0.000268451
			Bananas	26.21	45	0.57	0.07	0.678	17.7704		79.4125	3.10136	17.4861	14.1119	0.551123	3.10735	14.1119	0.0220449	0.0104274
			Plantains	1.38	3	0.03	0.01	0.6632	0.915216		68.8513	2.47131	28.6774	0.630138	0.0226178	0.26246	0.630138	0.000904712	0.000880739
			Apples	4.32	10	0.04	0.04	0.357	1.54224		72.4477	2.06109	25.4912	1.11732	0.031787	0.393135	1.11732	0.00127148	0.00131924
			Pineapples	1.92	5	0.03	0.01	0.6632	1.27334		68.8513	2.47131	28.6774	0.876714	0.0314682	0.365162	0.876714	0.00125873	0.00122538
			Dates	0	0	0	0	0.6632	0		68.8513	2.47131	28.6774	0	0	0	0	0	0
			Grapes (excluding wine)	3.19	5	0.05	0.04	1.214	3.87266		68.8513	2.47131	28.6774	2.66638	0.0957053	1.11058	2.66638	0.00382821	0.00372677
			Fruits, other	26.26	44	0.51	0.83	0.75	19.695		68.8513	2.47131	28.6774	13.5603	0.486724	5.64802	13.5603	0.019469	0.0189531
	Vegetables		Cassava	1.99	6	0.05	0.01	0.987	1.96413	68.7944	83.6105	0.362596	16.0269	1.64222	0.00712186	0.31479	1.64222	0.000284875	0.00105634	42.6672	0.0825487	0.08075
			Potatoes	7.24	15	0.33	0.02	0.37	2.6788		59.711	1.6649	38.6241	1.59954	0.0445994	1.03466	1.59954	0.00178398	0.00347202
			Sweet potatoes	2.69	6	0.07	0.01	0.365	0.98185		65.672	2.57696	31.751	0.644801	0.0253019	0.311747	0.644801	0.00101208	0.00104613
			Yams	0	0	0	0	0.365	0		65.672	2.57696	31.751	0	0	0	0	0	0
			Roots, other	0.15	1	0.02	0	0.365	0.05475		65.672	2.57696	31.751	0.0359554	0.00141089	0.0173837	0.0359554	5.64355e-05	5.83345e-05
			Tomatoes	16.27	11	0.53	0.13	1.427	23.2173		53.5199	4.20609	42.274	12.4259	0.976539	9.81487	12.4259	0.0390616	0.0329358
			Onions	4.69	4	0.14	0.03	0.395	1.85255		71.3251	1.22109	27.4538	1.32133	0.0226213	0.508596	1.32133	0.000904853	0.0017067
			Vegetables, other	74.49	52	2.85	0.46	0.455	33.8929		65.672	2.57696	31.751	22.2582	0.873409	10.7614	22.2582	0.0349364	0.0361119
			Aquatic plants	0	0	0	0	0	0		65.672	2.57696	31.751	0	0	0	0	0	0
			Beans	0.12	1	0.08	0.01	1.61	0.1932		75.1226	5.04344	19.834	0.145137	0.00974393	0.0383193	0.145137	0.000389757	0.000128588
			Peas	0	0	0	0	0.896	0		66.4257	5.15877	28.4155	0	0	0	0	0	0
			Pulses, other	0.49	5	0.28	0.02	1.61	0.7889		65.672	2.57696	31.751	0.518087	0.0203297	0.250484	0.518087	0.000813187	0.00084055
			Nuts	0.51	7	0.18	0.63	0.278	0.14178		62.5618	3.79852	33.6397	0.0887002	0.00538553	0.0476943	0.0887002	0.000215421	0.000160048
			Soybeans	0.03	0	0.01	0	1.8925	0.056775		63.3478	1.20151	35.4507	0.0359657	0.000682155	0.0201271	0.0359657	2.72862e-05	6.75407e-05
			Groundnuts (shelled equivalents)	1.19	19	0.8	1.6	2.497	2.97143		65.672	2.57696	31.751	1.9514	0.0765727	0.943459	1.9514	0.00306291	0.00316597
	Meat	Ruminant	Bovine meat	7.06	37	3.95	2.21	42.8	302.168	344.65	10.5	73	16.5	31.7276	220.583	49.8577	31.7276	8.82331	0.167308	40.3515	9.7749	0.201094
			Mutton and goat meat	1.74	9	0.67	0.68	24.415	42.4821		20.3	56	23.7	8.62387	23.79	10.0683	8.62387	0.951599	0.0337861
		Non-ruminant	Pig meat	25.79	192	9.43	16.56	7.282	187.803	572.715	47.5051	28.439	24.0559	89.2158	53.4093	45.1776	89.2158	2.13637	0.151603	293.5	3.46532	0.646249
			Poultry meat	51.88	221	19.68	15.3	6.092	316.053		53.86	5.83151	40.3085	170.226	18.4307	127.396	170.226	0.737227	0.427504
			Meat, other	0.12	1	0.09	0.02	6.687	0.80244		49.4604	21.4829	29.0567	0.39689	0.172387	0.233162	0.39689	0.00689549	0.000782424
			Offals, edible	2.53	8	1.2	0.26	26.9	68.057		49.4604	21.4829	29.0567	33.6613	14.6206	19.7751	33.6613	0.584824	0.0663594
	Seafood		Freshwater fish	1.57	3	0.45	0.12	4.005	6.28785	124.229	49.4604	21.4829	29.0567	3.11	1.35081	1.82704	3.11	0.0540325	0.00613101	114.118	0.338521	0.0266302
			Demersal fish	1.94	3	0.5	0.07	4.005	7.7697		78.6427	5.32556	16.0317	6.11031	0.41378	1.24561	6.11031	0.0165512	0.00417991
			Pelagic fish	10	25	2.91	1.35	4.005	40.05		91.6865	7.21239	1.10113	36.7204	2.88856	0.441003	36.7204	0.115542	0.00147988
			Marine fish, other	1.63	3	0.52	0.12	4.005	6.52815		89.095	4.66193	6.24304	5.81626	0.304338	0.407555	5.81626	0.0121735	0.00136763
			Crustaceans	8.27	9	1.88	0.09	7.3405	60.7059		89.095	4.66193	6.24304	54.086	2.83007	3.7899	54.086	0.113203	0.0127178
			Cephalopods	0.18	0	0.08	0.01	7.3405	1.32129		89.095	4.66193	6.24304	1.1772	0.0615976	0.0824887	1.1772	0.00246391	0.000276808
			Molluscs, other	1.07	1	0.08	0.01	7.3405	7.85433		90.3737	7.81574	1.81055	7.09825	0.613874	0.142206	7.09825	0.024555	0.000477202
			Aquatic animals, others	0	0	0	0	6.6476	0		89.095	4.66193	6.24304	0	0	0	0	0	0
	Dairy		Cream	0.8	4	0.06	0.43	2.781	2.2248	110.477	24.1	56.7	19.2	0.536177	1.26146	0.427162	0.536177	0.0504585	0.00143343	24.771	2.58389	0.0708341
			Butter, ghee	1.89	38	0.04	4.32	2.781	5.25609		24.1	56.7	19.2	1.26672	2.9802	1.00917	1.26672	0.119208	0.00338647
			Milk (excluding butter) *includes cheese	28.61	166	9.03	10.8	3.6	102.996		22.3	58.6	19.1	22.9681	60.3557	19.6722	22.9681	2.41423	0.0660142
	Eggs		Eggs	6.37	24	1.8	1.6	4.507	28.7096	28.7096	41.5	6.5	52	11.9145	1.86612	14.929	11.9145	0.0746449	0.0500973	11.9145	0.0746449	0.0500973
	Oils		Oilcrops, other	0.03	0	0.03	0.01	1.313	0.03939	85.145	61.4	13	25.6	0.0241855	0.0051207	0.0100838	0.0241855	0.000204828	3.38384e-05	52.9472	0.386713	0.0716823
			Soybean oil	2.27	55	0	6.21	6.117	13.8856		61.4	13	25.6	8.52575	1.80513	3.55471	8.52575	0.0722051	0.0119286
			Groundnut oil	0	0	0	0	5.752	0		61.4	13	25.6	0	0	0	0	0	0
			Sunflowerseed oil	0	0	0	0.01	3.607	0		61.4	13	25.6	0	0	0	0	0	0
			Rape and mustard oil	0	0	0	0	3.828	0		65.1	3.3	31.6	0	0	0	0	0	0
			Cottonseed oil	0.01	0	0	0.01	5.752	0.05752		61.4	13	25.6	0.0353173	0.0074776	0.0147251	0.0353173	0.000299104	4.94132e-05
			Palmkernel oil	0.01	0	0	0.01	5.752	0.05752		56.142	28.9894	14.8685	0.0322929	0.0166747	0.00855238	0.0322929	0.000666989	2.86992e-05
			Sesame seed oil	0.02	1	0	0.06	5.752	0.11504		61.4	13	25.6	0.0706346	0.0149552	0.0294502	0.0706346	0.000598208	9.88263e-05
			Palm oil	0.12	3	0	0.33	7.605	0.9126		61.4923	12.9177	25.59	0.561179	0.117887	0.233534	0.561179	0.00471548	0.000783672
			Coconut oil	0.05	1	0	0.13	5.752	0.2876		61.4	13	25.6	0.176586	0.037388	0.0736256	0.176586	0.00149552	0.000247066
			Olive Oil	0.39	10	0	1.08	5.944	2.31816		89.1721	3.20831	7.61958	2.06715	0.0743737	0.176634	2.06715	0.00297495	0.000592732
			Rice bran oil	0	0	0	0	5.752	0		61.4	13	25.6	0	0	0	0	0	0
			Maize germ oil	0.08	2	0	0.21	5.752	0.46016		61.4	13	25.6	0.282538	0.0598208	0.117801	0.282538	0.00239283	0.000395305
			Oilcrops oil, other	9.97	191	0.1	21.58	5.752	57.3474		61.4	13	25.6	35.2113	7.45517	14.6809	35.2113	0.298207	0.0492649
			Fats, animals, raw	0.08	27	0.03	3.08	6.733	0.53864		61.4	13	25.6	0.330725	0.0700232	0.137892	0.330725	0.00280093	0.000462724
			Fish, body oil	0	0	0	0	6.733	0		61.4	13	25.6	0	0	0	0	0	0
			Fish, liver oil	0	0	0	0	6.733	0		61.4	13	25.6	0	0	0	0	0	0
			Sunflower seed	0.01	0	0.01	0.01	1.313	0.01313		61.4	13	25.6	0.00806182	0.0017069	0.00336128	0.00806182	6.8276e-05	1.12795e-05
			Rape and mustardseed	0	3	0	0	1.313	0		65.1	3.3	31.6	0	0	0	0	0	0
			Sesame seed	0	0	0	0	1.313	0		61.4923	12.9177	25.59	0	0	0	0	0	0
			Palm kernels	0	0	0	0	1.313	0		56.142	28.9894	14.8685	0	0	0	0	0	0
			Olives (including preserved)	0.05	0	0	0.01	1.313	0.06565		89.1721	3.20831	7.61958	0.0585415	0.00210625	0.00500225	0.0585415	8.42502e-05	1.67861e-05
			Coconuts (including copra)	6.89	26	0.31	2.41	1.313	9.04657		61.4923	12.9177	25.59	5.56294	0	2.31502	5.56294	0	0.00776851
	Beverages		Coffee	0.69	1	0.13	0	16.477	11.3691	50.3977	53.6	0	46.4	6.09385	0	5.27528	6.09385	0	0.0177023	38.2202	0.0384956	0.0378648
			Wine	5.53	11	0	0	1.585	8.76505		79.6583	3.35563	17.7687	6.98209	0.294123	1.55744	6.98209	0.0117649	0.00522631
			Beer	5.45	5	0.04	0	1.109	6.04405		95	0	5	5.74185	0	0.302202	5.74185	0	0.0010141
			Beverages, fermented	0.66	1	0	0	1.347	0.88902		82	3	15	0.728996	0.0266706	0.133353	0.728996	0.00106682	0.000447493
			Beverages, alcoholic	13.99	113	0	0	1.347	18.8445		82	3	15	15.4525	0.565336	2.82668	15.4525	0.0226134	0.0094855
			Tea (including mate)	0.37	0	0.1	0	12.124	4.48588		71.8	1.7	26.5	3.22086	0.07626	1.18876	3.22086	0.0030504	0.00398912
	Other		Sugar cane	0	0	0	0	2.672	0	293.642	74.1	1.1	24.8	0	0	0	0	0	0	163.753	2.42014	0.233697
			Sugar (non-centrifugal)	0	0	0	0	0.97	0		59.6	16.5	24	0	0	0	0	0	0
			Sugar beet	0	0	0	0	1.536	0		59.6	16.5	24	0	0	0	0	0	0
			Sugar (raw equivalent)	32.77	314	0	0	0.97	31.7869		30.4914	47.2261	22.2824	9.69228	15.0117	7.08289	9.69228	0.600469	0.0237681
			Sweeteners, other	28.27	40	0	0	0.97	27.4219		59.6	16.5	24	16.3435	4.52461	6.58126	16.3435	0.180985	0.0220848
			Honey	0.32	3	0	0	0.97	0.3104		59.6	16.5	24	0.184998	0.051216	0.074496	0.184998	0.00204864	0.000249987
			Cocoa beans	0	30	0.32	2.73	18.681	0		59.6	16.5	24	0	0	0	0	0	0
			Pepper	0.12	1	0.04	0.01	12.124	1.45488		59.6	16.5	24	0.867108	0.240055	0.349171	0.867108	0.00960221	0.00117172
			Pimento	0.02	0	0.01	0.01	12.124	0.24248		59.6	16.5	24	0.144518	0.0400092	0.0581952	0.144518	0.00160037	0.000195286
			Cloves	0.01	0	0	0.01	12.124	0.12124		59.6	16.5	24	0.072259	0.0200046	0.0290976	0.072259	0.000800184	9.7643e-05
			Spices, other	1.78	16	0.55	0.76	12.124	21.5807		59.6	16.5	24	12.8621	3.56082	5.17937	12.8621	0.142433	0.0173804
			Infant food	2.06	21	0.86	0.16	2.781	5.72886		24.6	56.4	19	1.4093	3.23108	1.08848	1.4093	0.129243	0.00365263
			Miscellaneous	29.96	34	0.99	0.41	6.84227	204.994		59.6	16.5	24	122.177	33.8241	49.1987	122.177	1.35296	0.165096
Barbados	Grain products (non-rice)		Wheat	63.66	550	14.42	2.41	1.4	89.124	105.493	57.9	1.8	40.3	51.6028	1.60423	35.917	51.6028	0.0641693	0.120527	62.6127	0.0771108	0.137443	287000	2.73301e+08	7.82375e+06	486380
			Barley	1.66	11	0.17	0	1.313	2.17958		54.569	1.91155	43.5195	1.18937	0.0416638	0.948542	1.18937	0.00166655	0.00318303
			Maize	10.49	93	2	0.31	0.988	10.3641		71.9	2.05597	26.1	7.4518	0.213084	2.70504	7.4518	0.00852334	0.0090773
			Millet	0	0	0	0	1.313	0		61.8	1.8	36.4	0	0	0	0	0	0
			Rye	0.03	0	0.01	0	1.4	0.042		73.3007	1.65211	25.0472	0.0307863	0.000693888	0.0105198	0.0307863	2.77555e-05	3.53014e-05
			Oats	1.56	16	0.69	0.27	1.575	2.457		61.8	1.8	36.4	1.51843	0.044226	0.894348	1.51843	0.00176904	0.00300117
			Sorghum	0	0	0	0	1.313	0		61.8	1.8	36.4	0	0	0	0	0	0
			Cereals, other	1.01	10	0.28	0.03	1.313	1.32613		61.8	1.8	36.4	0.819548	0.0238703	0.482711	0.819548	0.000954814	0.00161984
	Rice		Rice (milled equivalent)	16.4	161	3.32	0.68	3.839	62.9596	62.9596	22.2	71.8	6	13.977	45.205	3.77758	13.977	1.8082	0.0126764	13.977	1.8082	0.0126764
	Fruit		Oranges, mandarines	8.53	13	0.2	0.03	0.317	2.70401	47.0106	56.9055	1.22138	41.8731	1.53873	0.0330262	1.13225	1.53873	0.00132105	0.00379951	32.9356	0.0458968	0.0433814
			Lemons, limes	1.89	1	0.03	0.02	0.317	0.59913		56.3759	0	43.6241	0.337765	0	0.261365	0.337765	0	0.000877063
			Grapefruit	1.26	1	0.02	0	0.317	0.39942		68.8513	2.47131	28.6774	0.275006	0.00987089	0.114543	0.275006	0.000394836	0.000384374
			Citrus, other	0.03	0	0	0	0.317	0.00951		68.8513	2.47131	28.6774	0.00654776	0.000235021	0.00272722	0.00654776	9.40085e-06	9.15175e-06
			Bananas	11.61	20	0.26	0.03	0.678	7.87158		79.4125	3.10136	17.4861	6.25102	0.244126	1.37643	6.25102	0.00976503	0.00461891
			Plantains	2.97	6	0.07	0.03	0.6632	1.9697		68.8513	2.47131	28.6774	1.35617	0.0486774	0.56486	1.35617	0.0019471	0.0018955
			Apples	10.48	15	0.07	0.07	0.357	3.74136		72.4477	2.06109	25.4912	2.71053	0.077113	0.953716	2.71053	0.00308452	0.00320039
			Pineapples	4.34	6	0.04	0.01	0.6632	2.87829		68.8513	2.47131	28.6774	1.98174	0.0711313	0.825419	1.98174	0.00284525	0.00276986
			Dates	0.09	1	0	0	0.6632	0.059688		68.8513	2.47131	28.6774	0.0410959	0.00147507	0.017117	0.0410959	5.90029e-05	5.74395e-05
			Grapes (excluding wine)	8.46	15	0.12	0.08	1.214	10.2704		68.8513	2.47131	28.6774	7.07133	0.253814	2.9453	7.07133	0.0101526	0.00988355
			Fruits, other	22.01	32	0.42	0.61	0.75	16.5075		68.8513	2.47131	28.6774	11.3656	0.407951	4.73392	11.3656	0.016318	0.0158857
	Vegetables		Cassava	2.05	6	0.04	0.02	0.987	2.02335	69.7342	83.6105	0.362596	16.0269	1.69173	0.00733659	0.324281	1.69173	0.000293464	0.00108819	44.9431	0.0687931	0.0774203
			Potatoes	38.38	73	2.1	0.14	0.37	14.2006		59.711	1.6649	38.6241	8.47932	0.236426	5.48486	8.47932	0.00945704	0.0184056
			Sweet potatoes	4.85	12	0.13	0.03	0.365	1.77025		65.672	2.57696	31.751	1.16256	0.0456187	0.562072	1.16256	0.00182475	0.00188615
			Yams	1.02	3	0.05	0.01	0.365	0.3723		65.672	2.57696	31.751	0.244497	0.00959403	0.118209	0.244497	0.000383761	0.000396675
			Roots, other	0.97	3	0.05	0.01	0.365	0.35405		65.672	2.57696	31.751	0.232512	0.00912374	0.112414	0.232512	0.00036495	0.00037723
			Tomatoes	3.47	2	0.1	0.03	1.427	4.95169		53.5199	4.20609	42.274	2.65014	0.208272	2.09328	2.65014	0.00833089	0.00702442
			Onions	6.89	8	0.25	0.04	0.395	2.72155		71.3251	1.22109	27.4538	1.94115	0.0332326	0.74717	1.94115	0.0013293	0.00250728
			Vegetables, other	59.26	50	2.28	0.41	0.455	26.9633		65.672	2.57696	31.751	17.7073	0.694834	8.56112	17.7073	0.0277934	0.0287286
			Aquatic plants	0	0	0	0	0	0		65.672	2.57696	31.751	0	0	0	0	0	0
			Beans	0.6	6	0.36	0.03	1.61	0.966		75.1226	5.04344	19.834	0.725684	0.0487196	0.191596	0.725684	0.00194879	0.000642941
			Peas	1.39	13	0.86	0.07	0.896	1.24544		66.4257	5.15877	28.4155	0.827292	0.0642494	0.353898	0.827292	0.00256998	0.00118758
			Pulses, other	5.32	50	3.25	0.3	1.61	8.5652		65.672	2.57696	31.751	5.62494	0.220722	2.71954	5.62494	0.00882888	0.00912597
			Nuts	1.22	19	0.53	1.73	0.278	0.33916		62.5618	3.79852	33.6397	0.212185	0.012883	0.114092	0.212185	0.000515322	0.00038286
			Soybeans	0.26	0	0.04	0	1.8925	0.49205		63.3478	1.20151	35.4507	0.311703	0.00591201	0.174435	0.311703	0.000236481	0.000585352
			Groundnuts (shelled equivalents)	1.91	28	1.25	2.38	2.497	4.76927		65.672	2.57696	31.751	3.13208	0.122902	1.51429	3.13208	0.00491609	0.00508152
	Meat	Ruminant	Bovine meat	12.2	52	6.03	2.92	42.8	522.16	619.576	10.5	73	16.5	54.8268	381.177	86.1564	54.8268	15.2471	0.289115	74.6022	17.4292	0.36659
			Mutton and goat meat	3.99	23	1.46	1.86	24.415	97.4159		20.3	56	23.7	19.7754	54.5529	23.0876	19.7754	2.18212	0.077475
		Non-ruminant	Pig meat	8.42	51	1.82	4.5	7.282	61.3144	415.383	47.5051	28.439	24.0559	29.1275	17.4372	14.7497	29.1275	0.69749	0.0494957	217.293	1.88419	0.50666
			Poultry meat	48.66	207	15.84	15.54	6.092	296.437		53.86	5.83151	40.3085	159.661	17.2867	119.489	159.661	0.69147	0.40097
			Meat, other	0.05	0	0.03	0.02	6.687	0.33435		49.4604	21.4829	29.0567	0.165371	0.071828	0.097151	0.165371	0.00287312	0.00032601
			Offals, edible	2.13	6	1.06	0.19	26.9	57.297		49.4604	21.4829	29.0567	28.3393	12.309	16.6486	28.3393	0.492362	0.0558678
	Seafood		Freshwater fish	0.96	2	0.31	0.1	4.005	3.8448	177.523	49.4604	21.4829	29.0567	1.90165	0.825974	1.11717	1.90165	0.033039	0.0037489	162.187	0.473507	0.0246407
			Demersal fish	1.36	2	0.43	0.02	4.005	5.4468		78.6427	5.32556	16.0317	4.28351	0.290073	0.873214	4.28351	0.0116029	0.00293025
			Pelagic fish	25.59	64	7.54	3.36	4.005	102.488		91.6865	7.21239	1.10113	93.9676	7.39183	1.12853	93.9676	0.295673	0.003787
			Marine fish, other	12.17	21	3.66	0.56	4.005	48.7409		89.095	4.66193	6.24304	43.4257	2.27227	3.04291	43.4257	0.0908906	0.0102111
			Crustaceans	2.02	2	0.46	0.02	7.3405	14.8278		89.095	4.66193	6.24304	13.2108	0.691262	0.925706	13.2108	0.0276505	0.0031064
			Cephalopods	0.45	1	0.19	0.01	7.3405	3.30322		89.095	4.66193	6.24304	2.94301	0.153994	0.206222	2.94301	0.00615976	0.000692019
			Molluscs, other	0.37	0	0.03	0	7.3405	2.71598		90.3737	7.81574	1.81055	2.45454	0.212274	0.0491742	2.45454	0.00849097	0.000165014
			Aquatic animals, others	0	0	0	0	6.6476	0		89.095	4.66193	6.24304	0	0	0	0	0	0
	Dairy		Cream	1.65	9	0.12	0.87	2.781	4.58865	90.9487	24.1	56.7	19.2	1.10586	2.60176	0.881021	1.10586	0.104071	0.00295645	20.4062	2.12657	0.0583159
			Butter, ghee	0.84	16	0.02	1.86	2.781	2.33604		24.1	56.7	19.2	0.562986	1.32453	0.44852	0.562986	0.0529814	0.0015051
			Milk (excluding butter) *includes cheese	23.34	186	9.62	10.95	3.6	84.024		22.3	58.6	19.1	18.7374	49.2381	16.0486	18.7374	1.96952	0.0538543
	Eggs		Eggs	8.7	31	2.39	2.08	4.507	39.2109	39.2109	41.5	6.5	52	16.2725	2.54871	20.3897	16.2725	0.101948	0.0684217	16.2725	0.101948	0.0684217
	Oils		Oilcrops, other	0	0	0	0	1.313	4.05717	82.6411	61.4	13	25.6	2.4911	0.527432	1.03864	2.4911	0.0210973	0.00348535	53.3336	0.328903	0.0657519
			Soybean oil	3.99	97	0	10.93	6.117	24.4068		61.4	13	25.6	14.9858	3.17289	6.24815	14.9858	0.126916	0.0209669
			Groundnut oil	0.01	0	0	0.02	5.752	0.05752		61.4	13	25.6	0.0353173	0.0074776	0.0147251	0.0353173	0.000299104	4.94132e-05
			Sunflowerseed oil	1.57	38	0	4.31	3.607	5.66299		61.4	13	25.6	3.47708	0.736189	1.44973	3.47708	0.0294475	0.00486485
			Rape and mustard oil	0	0	0	0	3.828	0		65.1	3.3	31.6	0	0	0	0	0	0
			Cottonseed oil	0.36	9	0	0.98	5.752	2.07072		61.4	13	25.6	1.27142	0.269194	0.530104	1.27142	0.0107677	0.00177887
			Palmkernel oil	0	0	0	0.01	5.752	0		56.142	28.9894	14.8685	0	0	0	0	0	0
			Sesame seed oil	0.02	1	0	0.07	5.752	0.11504		61.4	13	25.6	0.0706346	0.0149552	0.0294502	0.0706346	0.000598208	9.88263e-05
			Palm oil	0	0	0	0	7.605	0		61.4923	12.9177	25.59	0	0	0	0	0	0
			Coconut oil	0	0	0	0	5.752	0		61.4	13	25.6	0	0	0	0	0	0
			Olive Oil	1.49	36	0	4.1	5.944	8.85656		89.1721	3.20831	7.61958	7.89758	0.284146	0.674833	7.89758	0.0113658	0.00226454
			Rice bran oil	0	0	0	0	5.752	0		61.4	13	25.6	0	0	0	0	0	0
			Maize germ oil	0.62	15	0	1.71	5.752	3.56624		61.4	13	25.6	2.18967	0.463611	0.912957	2.18967	0.0185444	0.00306362
			Oilcrops oil, other	3.09	72	0.04	8.14	5.752	17.7737		61.4	13	25.6	10.913	2.31058	4.55006	10.913	0.0924231	0.0152687
			Fats, animals, raw	0.41	37	0.01	4.17	6.733	2.76053		61.4	13	25.6	1.69497	0.358869	0.706696	1.69497	0.0143548	0.00237146
			Fish, body oil	0	0	0	0	6.733	0		61.4	13	25.6	0	0	0	0	0	0
			Fish, liver oil	0	0	0	0	6.733	0		61.4	13	25.6	0	0	0	0	0	0
			Sunflower seed	0.03	0	0.01	0.03	1.313	0.03939		61.4	13	25.6	0.0241855	0.0051207	0.0100838	0.0241855	0.000204828	3.38384e-05
			Rape and mustardseed	1	11	1	1	1.313	1.313		65.1	3.3	31.6	0.854763	0.043329	0.414908	0.854763	0.00173316	0.00139231
			Sesame seed	0.12	2	0.06	0.16	1.313	0.15756		61.4923	12.9177	25.59	0.0968873	0.0203531	0.0403196	0.0968873	0.000814125	0.000135301
			Palm kernels	0	0	0	0	1.313	0		56.142	28.9894	14.8685	0	0	0	0	0	0
			Olives (including preserved)	0.2	1	0.01	0.06	1.313	0.2626		89.1721	3.20831	7.61958	0.234166	0.00842502	0.020009	0.234166	0.000337001	6.71444e-05
			Coconuts (including copra)	8.79	35	0.41	3.23	1.313	11.5413		61.4923	12.9177	25.59	7.09699	0	2.95341	7.09699	0	0.00991077
	Beverages		Coffee	1.59	4	0.24	0	16.477	26.1984	92.4455	53.6	0	46.4	14.0424	0	12.1561	14.0424	0	0.0407922	71.3095	0.0327928	0.0685636
			Wine	9.34	19	0	0	1.585	14.8039		79.6583	3.35563	17.7687	11.7925	0.496764	2.63047	11.7925	0.0198706	0.00882707
			Beer	31.75	31	0.26	0	1.109	35.2107		95	0	5	33.4502	0	1.76054	33.4502	0	0.00590784
			Beverages, fermented	0.35	0	0	0	1.347	0.47145		82	3	15	0.386589	0.0141435	0.0707175	0.386589	0.00056574	0.000237307
			Beverages, alcoholic	2.34	19	0	0	1.347	3.15198		82	3	15	2.58462	0.0945594	0.472797	2.58462	0.00378238	0.00158657
			Tea (including mate)	1.04	1	0.29	0	12.124	12.609		71.8	1.7	26.5	9.05323	0.214352	3.34137	9.05323	0.00857409	0.0112127
	Other		Sugar cane	0	0	0	0	2.672	0	333.123	74.1	1.1	24.8	0	0	0	0	0	0	182.396	2.88334	0.264838
			Sugar (non-centrifugal)	0	0	0	0	0.97	0		59.6	16.5	24	0	0	0	0	0	0
			Sugar beet	0	0	0	0	1.536	0		59.6	16.5	24	0	0	0	0	0	0
			Sugar (raw equivalent)	54.01	531	0	0	0.97	52.3897		30.4914	47.2261	22.2824	15.9744	24.7416	11.6737	15.9744	0.989666	0.0391735
			Sweeteners, other	6.09	15	0	0	0.97	5.9073		59.6	16.5	24	3.52075	0.974704	1.41775	3.52075	0.0389882	0.00475756
			Honey	0.55	5	0	0	0.97	0.5335		59.6	16.5	24	0.317966	0.0880275	0.12804	0.317966	0.0035211	0.000429664
			Cocoa beans	0	13	0.25	1.16	18.681	0		59.6	16.5	24	0	0	0	0	0	0
			Pepper	0.33	3	0.1	0.03	12.124	4.00092		59.6	16.5	24	2.38455	0.660152	0.960221	2.38455	0.0264061	0.00322222
			Pimento	0.22	2	0.07	0.11	12.124	2.66728		59.6	16.5	24	1.5897	0.440101	0.640147	1.5897	0.017604	0.00214814
			Cloves	0.05	0	0.01	0.03	12.124	0.6062		59.6	16.5	24	0.361295	0.100023	0.145488	0.361295	0.00400092	0.000488215
			Spices, other	1.18	11	0.33	0.39	12.124	14.3063		59.6	16.5	24	8.52657	2.36054	3.43352	8.52657	0.0944217	0.0115219
			Infant food	0.92	9	0.38	0.08	2.781	2.55852		24.6	56.4	19	0.629396	1.44301	0.486119	0.629396	0.0577202	0.00163127
			Miscellaneous	36.56	41	1.2	0.5	6.84227	250.153		59.6	16.5	24	149.091	41.2753	60.0368	149.091	1.65101	0.201466
Belize	Grain products (non-rice)		Wheat	53.52	435	11.89	2.59	1.4	74.928	108.035	57.9	1.8	40.3	43.3833	1.3487	30.196	43.3833	0.0539482	0.101329	66.5155	0.080494	0.132623	390000	2.61205e+08	6.45497e+06	441855
			Barley	0	0	0	0	1.313	0		54.569	1.91155	43.5195	0	0	0	0	0	0
			Maize	26.78	234	5.28	0.73	0.988	26.4586		71.9	2.05597	26.1	19.0238	0.543983	6.90571	19.0238	0.0217593	0.0231735
			Millet	0	0	0	0	1.313	0		61.8	1.8	36.4	0	0	0	0	0	0
			Rye	0	0	0	0	1.4	0		73.3007	1.65211	25.0472	0	0	0	0	0	0
			Oats	1.77	19	0.77	0.31	1.575	2.78775		61.8	1.8	36.4	1.72283	0.0501795	1.01474	1.72283	0.00200718	0.00340517
			Sorghum	2.38	22	0.66	0.21	1.313	3.12494		61.8	1.8	36.4	1.93121	0.0562489	1.13748	1.93121	0.00224996	0.00381704
			Cereals, other	0.56	6	0.15	0.01	1.313	0.73528		61.8	1.8	36.4	0.454403	0.013235	0.267642	0.454403	0.000529402	0.000898127
	Rice		Rice (milled equivalent)	39.62	257	5.09	0.43	3.839	152.101	152.101	22.2	71.8	6	33.7665	109.209	9.12607	33.7665	4.36835	0.0306244	33.7665	4.36835	0.0306244
	Fruit		Oranges, mandarines	95.5	70	1.28	0.25	0.317	30.2735	67.546	56.9055	1.22138	41.8731	17.2273	0.369754	12.6765	17.2273	0.0147902	0.0425385	42.9006	0.0515808	0.0783753
			Lemons, limes	0.01	0	0	0	0.317	0.00317		56.3759	0	43.6241	0.00178712	0	0.00138288	0.00178712	0	4.64055e-06
			Grapefruit	1.21	1	0.01	0	0.317	0.38357		68.8513	2.47131	28.6774	0.264093	0.00947919	0.109998	0.264093	0.000379168	0.000369121
			Citrus, other	0	0	0	0	0.317	0		68.8513	2.47131	28.6774	0	0	0	0	0	0
			Bananas	0	0	0	0	0.678	0		79.4125	3.10136	17.4861	0	0	0	0	0	0
			Plantains	10.3	21	0.23	0.09	0.6632	6.83096		68.8513	2.47131	28.6774	4.7032	0.168814	1.95894	4.7032	0.00675256	0.00657363
			Apples	0.87	1	0.01	0.01	0.357	0.31059		72.4477	2.06109	25.4912	0.225015	0.00640155	0.079173	0.225015	0.000256062	0.000265681
			Pineapples	4.6	9	0.06	0.01	0.6632	3.05072		68.8513	2.47131	28.6774	2.10046	0.0753926	0.874868	2.10046	0.00301571	0.0029358
			Dates	0.01	0	0	0	0.6632	0.006632		68.8513	2.47131	28.6774	0.00456622	0.000163897	0.00190189	0.00456622	6.55588e-06	6.38217e-06
			Grapes (excluding wine)	0.99	2	0.01	0.01	1.214	1.20186		68.8513	2.47131	28.6774	0.827496	0.0297016	0.344662	0.827496	0.00118807	0.00115659
			Fruits, other	33.98	28	0.39	0.14	0.75	25.485		68.8513	2.47131	28.6774	17.5467	0.629812	7.30844	17.5467	0.0251925	0.024525
	Vegetables		Cassava	1.54	5	0.04	0.01	0.987	1.51998	55.6103	83.6105	0.362596	16.0269	1.27086	0.00551139	0.243606	1.27086	0.000220456	0.000817471	37.4479	0.0743445	0.0547107
			Potatoes	11.26	23	0.54	0.04	0.37	4.1662		59.711	1.6649	38.6241	2.48768	0.0693632	1.60916	2.48768	0.00277453	0.00539986
			Sweet potatoes	0.13	0	0	0	0.365	0.04745		65.672	2.57696	31.751	0.0311614	0.00122277	0.0150659	0.0311614	4.89108e-05	5.05566e-05
			Yams	0.07	0	0	0	0.365	0.02555		65.672	2.57696	31.751	0.0167792	0.000658414	0.00811239	0.0167792	2.63366e-05	2.72228e-05
			Roots, other	0.47	1	0.01	0	0.365	0.17155		65.672	2.57696	31.751	0.11266	0.00442078	0.0544689	0.11266	0.000176831	0.000182781
			Tomatoes	4.15	3	0.11	0.04	1.427	5.92205		53.5199	4.20609	42.274	3.16948	0.249087	2.50349	3.16948	0.00996346	0.00840096
			Onions	7.67	9	0.27	0.04	0.395	3.02965		71.3251	1.22109	27.4538	2.1609	0.0369948	0.831755	2.1609	0.00147979	0.00279112
			Vegetables, other	36.26	28	1.39	0.22	0.455	16.4983		65.672	2.57696	31.751	10.8348	0.425155	5.23838	10.8348	0.0170062	0.0175785
			Aquatic plants	0	0	0	0	0	0		65.672	2.57696	31.751	0	0	0	0	0	0
			Beans	9.92	92	5.98	0.44	1.61	15.9712		75.1226	5.04344	19.834	11.998	0.805498	3.16773	11.998	0.0322199	0.01063
			Peas	4	38	2.47	0.2	0.896	3.584		66.4257	5.15877	28.4155	2.3807	0.18489	1.01841	2.3807	0.00739562	0.00341749
			Pulses, other	0.21	2	0.12	0.01	1.61	0.3381		65.672	2.57696	31.751	0.222037	0.00871271	0.10735	0.222037	0.000348509	0.000360236
			Nuts	0.65	11	0.27	0.99	0.278	0.1807		62.5618	3.79852	33.6397	0.113049	0.00686392	0.0607869	0.113049	0.000274557	0.000203983
			Soybeans	1.8	14	1.57	0.73	1.8925	3.4065		63.3478	1.20151	35.4507	2.15794	0.0409293	1.20763	2.15794	0.00163717	0.00405244
			Groundnuts (shelled equivalents)	0.3	4	0.17	0.32	2.497	0.7491		65.672	2.57696	31.751	0.491949	0.019304	0.237847	0.491949	0.000772161	0.000798144
	Meat	Ruminant	Bovine meat	3.95	22	1.78	1.56	42.8	169.06	171.746	10.5	73	16.5	17.7513	123.414	27.8949	17.7513	4.93655	0.093607	18.2965	4.99671	0.0957429
			Mutton and goat meat	0.11	1	0.04	0.04	24.415	2.68565		20.3	56	23.7	0.545187	1.50396	0.636499	0.545187	0.0601586	0.0021359
		Non-ruminant	Pig meat	19.14	124	7.88	9.62	7.282	139.377	320.697	47.5051	28.439	24.0559	66.2114	39.6376	33.5285	66.2114	1.58551	0.112512	162.802	2.16038	0.348608
			Poultry meat	25.78	111	8.32	8.38	6.092	157.052		53.86	5.83151	40.3085	84.5881	9.15849	63.3052	84.5881	0.36634	0.212434
			Meat, other	0.25	2	0.15	0.11	6.687	1.67175		49.4604	21.4829	29.0567	0.826855	0.35914	0.485755	0.826855	0.0143656	0.00163005
			Offals, edible	0.84	2	0.41	0.06	26.9	22.596		49.4604	21.4829	29.0567	11.1761	4.85427	6.56565	11.1761	0.194171	0.0220324
	Seafood		Freshwater fish	0.23	0	0.07	0.02	4.005	0.92115	70.5578	49.4604	21.4829	29.0567	0.455605	0.19789	0.267656	0.455605	0.00791558	0.000898173	63.8098	0.207399	0.00833629
			Demersal fish	1.39	2	0.33	0.03	4.005	5.56695		78.6427	5.32556	16.0317	4.378	0.296471	0.892476	4.378	0.0118589	0.00299489
			Pelagic fish	6.4	15	2.08	0.72	4.005	25.632		91.6865	7.21239	1.10113	23.5011	1.84868	0.282242	23.5011	0.0739472	0.000947121
			Marine fish, other	0.85	2	0.24	0.05	4.005	3.40425		89.095	4.66193	6.24304	3.03302	0.158704	0.212529	3.03302	0.00634815	0.000713184
			Crustaceans	0.46	1	0.16	0.01	7.3405	3.37663		89.095	4.66193	6.24304	3.00841	0.157416	0.210804	3.00841	0.00629665	0.000707397
			Cephalopods	0.07	0	0.03	0	7.3405	0.513835		89.095	4.66193	6.24304	0.457801	0.0239546	0.0320789	0.457801	0.000958185	0.000107647
			Molluscs, other	4.35	2	0.28	0.02	7.3405	31.9312		90.3737	7.81574	1.81055	28.8574	2.49566	0.578129	28.8574	0.0998263	0.00194003
			Aquatic animals, others	0.02	0	0	0	6.6476	0.132952		89.095	4.66193	6.24304	0.118454	0.00619813	0.00830025	0.118454	0.000247925	2.78532e-05
	Dairy		Cream	0.17	1	0.01	0.09	2.781	0.47277	98.1959	24.1	56.7	19.2	0.113938	0.268061	0.0907718	0.113938	0.0107224	0.000304603	21.9402	2.29991	0.0629455
			Butter, ghee	0.68	13	0.01	1.52	2.781	1.89108		24.1	56.7	19.2	0.45575	1.07224	0.363087	0.45575	0.0428897	0.00121841
			Milk (excluding butter) *includes cheese	26.62	132	7.65	5.01	3.6	95.832		22.3	58.6	19.1	21.3705	56.1576	18.3039	21.3705	2.2463	0.0614225
	Eggs		Eggs	4.78	17	1.29	1.13	4.507	21.5435	21.5435	41.5	6.5	52	8.94054	1.40032	11.2026	8.94054	0.056013	0.0375926	8.94054	0.056013	0.0375926
	Oils		Oilcrops, other	0	0	0	0	1.313	5.98728	85.3998	61.4	13	25.6	3.67619	0.778346	1.53274	3.67619	0.0311339	0.00514344	52.8406	0.417525	0.0724903
			Soybean oil	3.96	96	0	10.84	6.117	24.2233		61.4	13	25.6	14.8731	3.14903	6.20117	14.8731	0.125961	0.0208093
			Groundnut oil	0	0	0	0	5.752	0		61.4	13	25.6	0	0	0	0	0	0
			Sunflowerseed oil	1.99	48	0	5.45	3.607	7.17793		61.4	13	25.6	4.40725	0.933131	1.83755	4.40725	0.0373252	0.00616628
			Rape and mustard oil	0	0	0	0	3.828	0		65.1	3.3	31.6	0	0	0	0	0	0
			Cottonseed oil	0	0	0	0	5.752	0		61.4	13	25.6	0	0	0	0	0	0
			Palmkernel oil	0	0	0	0	5.752	0		56.142	28.9894	14.8685	0	0	0	0	0	0
			Sesame seed oil	0.14	3	0	0.37	5.752	0.80528		61.4	13	25.6	0.494442	0.104686	0.206152	0.494442	0.00418746	0.000691784
			Palm oil	0	0	0	0	7.605	0		61.4923	12.9177	25.59	0	0	0	0	0	0
			Coconut oil	0.02	1	0	0.06	5.752	0.11504		61.4	13	25.6	0.0706346	0.0149552	0.0294502	0.0706346	0.000598208	9.88263e-05
			Olive Oil	0.21	5	0	0.58	5.944	1.24824		89.1721	3.20831	7.61958	1.11308	0.0400474	0.0951107	1.11308	0.0016019	0.000319163
			Rice bran oil	0	0	0	0	5.752	0		61.4	13	25.6	0	0	0	0	0	0
			Maize germ oil	0.39	9	0	1.07	5.752	2.24328		61.4	13	25.6	1.37737	0.291626	0.57428	1.37737	0.0116651	0.00192711
			Oilcrops oil, other	4.56	98	0.04	11.04	5.752	26.2291		61.4	13	25.6	16.1047	3.40979	6.71465	16.1047	0.136391	0.0225324
			Fats, animals, raw	1.95	140	0.09	15.74	6.733	13.1293		61.4	13	25.6	8.06142	1.70682	3.36111	8.06142	0.0682726	0.0112789
			Fish, body oil	0	0	0	0	6.733	0		61.4	13	25.6	0	0	0	0	0	0
			Fish, liver oil	0	0	0	0	6.733	0		61.4	13	25.6	0	0	0	0	0	0
			Sunflower seed	0	0	0	0	1.313	0		61.4	13	25.6	0	0	0	0	0	0
			Rape and mustardseed	0	0	0	0	1.313	0		65.1	3.3	31.6	0	0	0	0	0	0
			Sesame seed	0.02	0	0.01	0.03	1.313	0.02626		61.4923	12.9177	25.59	0.0161479	0.00339219	0.00671993	0.0161479	0.000135688	2.25501e-05
			Palm kernels	0	0	0	0	1.313	0		56.142	28.9894	14.8685	0	0	0	0	0	0
			Olives (including preserved)	0.15	0	0.01	0.04	1.313	0.19695		89.1721	3.20831	7.61958	0.175624	0.00631876	0.0150068	0.175624	0.000252751	5.03583e-05
			Coconuts (including copra)	3.06	11	0.14	1.06	1.313	4.01778		61.4923	12.9177	25.59	2.47063	0	1.02815	2.47063	0	0.00345017
	Beverages		Coffee	1.86	5	0.26	0	16.477	30.6472	80.998	53.6	0	46.4	16.4269	0	14.2203	16.4269	0	0.0477192	62.0304	0.0155938	0.0624138
			Wine	1.74	3	0	0	1.585	2.7579		79.6583	3.35563	17.7687	2.1969	0.0925449	0.490044	2.1969	0.0037018	0.00164444
			Beer	32.7	32	0.27	0	1.109	36.2643		95	0	5	34.4511	0	1.81322	34.4511	0	0.00608461
			Beverages, fermented	0.2	0	0	0	1.347	0.2694		82	3	15	0.220908	0.008082	0.04041	0.220908	0.00032328	0.000135604
			Beverages, alcoholic	5.78	47	0	0	1.347	7.78566		82	3	15	6.38424	0.23357	1.16785	6.38424	0.00934279	0.00391896
			Tea (including mate)	0.27	0	0.06	0	12.124	3.27348		71.8	1.7	26.5	2.35036	0.0556492	0.867472	2.35036	0.00222597	0.00291098
	Other		Sugar cane	0	0	0	0	2.672	0	188.15	74.1	1.1	24.8	0	0	0	0	0	0	98.4663	1.82289	0.1485
			Sugar (non-centrifugal)	0	0	0	0	0.97	0		59.6	16.5	24	0	0	0	0	0	0
			Sugar beet	0	0	0	0	1.536	0		59.6	16.5	24	0	0	0	0	0	0
			Sugar (raw equivalent)	44.35	430	0	0	0.97	43.0195		30.4914	47.2261	22.2824	13.1173	20.3165	9.58579	13.1173	0.812658	0.0321671
			Sweeteners, other	10.9	13	0	0	0.97	10.573		59.6	16.5	24	6.30151	1.74455	2.53752	6.30151	0.0697818	0.00851517
			Honey	0.13	1	0	0	0.97	0.1261		59.6	16.5	24	0.0751556	0.0208065	0.030264	0.0751556	0.00083226	0.000101557
			Cocoa beans	0	15	0.26	1.34	18.681	0		59.6	16.5	24	0	0	0	0	0	0
			Pepper	0.07	1	0.02	0.01	12.124	0.84868		59.6	16.5	24	0.505813	0.140032	0.203683	0.505813	0.00560129	0.000683501
			Pimento	0.01	0	0	0.01	12.124	0.12124		59.6	16.5	24	0.072259	0.0200046	0.0290976	0.072259	0.000800184	9.7643e-05
			Cloves	0.01	0	0	0	12.124	0.12124		59.6	16.5	24	0.072259	0.0200046	0.0290976	0.072259	0.000800184	9.7643e-05
			Spices, other	0.14	1	0.04	0.06	12.124	1.69736		59.6	16.5	24	1.01163	0.280064	0.407366	1.01163	0.0112026	0.001367
			Infant food	1.18	12	0.49	0.09	2.781	3.28158		24.6	56.4	19	0.807269	1.85081	0.6235	0.807269	0.0740324	0.00209228
			Miscellaneous	18.76	21	0.62	0.26	6.84227	128.361		59.6	16.5	24	76.5032	21.1796	30.8066	76.5032	0.847183	0.103378
Bolivia (Plurinational State of)	Grain products (non-rice)		Wheat	56.28	412	11.8	1.23	1.4	78.792	113.988	57.9	1.8	40.3	45.6206	1.41826	31.7532	45.6206	0.0567302	0.106554	70.2533	0.0849917	0.139684	11513000	8.0487e+09	4.87258e+08	1.99218e+07
			Barley	0.01	0	0	0	1.313	0.01313		54.569	1.91155	43.5195	0.0071649	0.000250987	0.00571411	0.0071649	1.00395e-05	1.91749e-05
			Maize	28.87	267	6.24	1.74	0.988	28.5236		71.9	2.05597	26.1	20.5084	0.586437	7.44465	20.5084	0.0234575	0.024982
			Millet	0	0	0	0	1.313	0		61.8	1.8	36.4	0	0	0	0	0	0
			Rye	0.01	0	0	0	1.4	0.014		73.3007	1.65211	25.0472	0.0102621	0.000231296	0.00350661	0.0102621	9.25184e-06	1.17671e-05
			Oats	1.76	8	0.35	0.14	1.575	2.772		61.8	1.8	36.4	1.7131	0.049896	1.00901	1.7131	0.00199584	0.00338593
			Sorghum	0	0	0	0	1.313	0		61.8	1.8	36.4	0	0	0	0	0	0
			Cereals, other	2.95	28	0.99	0.49	1.313	3.87335		61.8	1.8	36.4	2.39373	0.0697203	1.4099	2.39373	0.00278881	0.00473121
	Rice		Rice (milled equivalent)	41.47	285	5.65	0.47	3.839	159.203	159.203	22.2	71.8	6	35.3431	114.308	9.5522	35.3431	4.57232	0.0320544	35.3431	4.57232	0.0320544
	Fruit		Oranges, mandarines	32.92	26	0.45	0.09	0.317	10.4356	54.5487	56.9055	1.22138	41.8731	5.93845	0.127459	4.36973	5.93845	0.00509835	0.0146635	36.9006	0.0492342	0.0550916
			Lemons, limes	2.71	1	0.02	0.02	0.317	0.85907		56.3759	0	43.6241	0.484309	0	0.374761	0.484309	0	0.00125759
			Grapefruit	0.37	0	0	0	0.317	0.11729		68.8513	2.47131	28.6774	0.0807557	0.0028986	0.0336357	0.0807557	0.000115944	0.000112872
			Citrus, other	0	0	0	0	0.317	0		68.8513	2.47131	28.6774	0	0	0	0	0	0
			Bananas	9.16	16	0.2	0.03	0.678	6.21048		79.4125	3.10136	17.4861	4.9319	0.192609	1.08597	4.9319	0.00770436	0.0036442
			Plantains	31.59	73	0.61	0.17	0.6632	20.9505		68.8513	2.47131	28.6774	14.4247	0.517751	6.00806	14.4247	0.02071	0.0201613
			Apples	3.19	4	0.03	0.03	0.357	1.13883		72.4477	2.06109	25.4912	0.825057	0.0234724	0.290301	0.825057	0.000938894	0.000974165
			Pineapples	6.96	6	0.04	0.02	0.6632	4.61587		68.8513	2.47131	28.6774	3.17809	0.114072	1.32371	3.17809	0.00456289	0.00444199
			Dates	0	0	0	0	0.6632	0		68.8513	2.47131	28.6774	0	0	0	0	0	0
			Grapes (excluding wine)	1.29	2	0.02	0.02	1.214	1.56606		68.8513	2.47131	28.6774	1.07825	0.0387021	0.449106	1.07825	0.00154809	0.00150707
			Fruits, other	11.54	14	0.19	0.31	0.75	8.655		68.8513	2.47131	28.6774	5.95908	0.213892	2.48203	5.95908	0.00855566	0.00832896
	Vegetables		Cassava	12.17	30	0.23	0.1	0.987	12.0118	70.4183	83.6105	0.362596	16.0269	10.0431	0.0435543	1.92512	10.0431	0.00174217	0.00646014	46.3416	0.0636297	0.0754562
			Potatoes	64.64	118	4.21	0.35	0.37	23.9168		59.711	1.6649	38.6241	14.281	0.398191	9.23766	14.281	0.0159277	0.0309988
			Sweet potatoes	0.59	1	0.02	0	0.365	0.21535		65.672	2.57696	31.751	0.141425	0.00554949	0.0683758	0.141425	0.00022198	0.000229449
			Yams	0	0	0	0	0.365	0		65.672	2.57696	31.751	0	0	0	0	0	0
			Roots, other	2.86	5	0.08	0.05	0.365	1.0439		65.672	2.57696	31.751	0.68555	0.0269009	0.331449	0.68555	0.00107604	0.00111224
			Tomatoes	6.63	4	0.15	0.05	1.427	9.46101		53.5199	4.20609	42.274	5.06353	0.397938	3.99954	5.06353	0.0159175	0.0134213
			Onions	7.05	8	0.25	0.04	0.395	2.78475		71.3251	1.22109	27.4538	1.98623	0.0340044	0.76452	1.98623	0.00136017	0.0025655
			Vegetables, other	24.18	20	0.87	0.15	0.455	11.0019		65.672	2.57696	31.751	7.22517	0.283515	3.49322	7.22517	0.0113406	0.0117222
			Aquatic plants	0	0	0	0	0	0		65.672	2.57696	31.751	0	0	0	0	0	0
			Beans	2.78	30	1.96	0.15	1.61	4.4758		75.1226	5.04344	19.834	3.36234	0.225734	0.88773	3.36234	0.00902937	0.00297896
			Peas	0.35	3	0.22	0.02	0.896	0.3136		66.4257	5.15877	28.4155	0.208311	0.0161779	0.0891111	0.208311	0.000647116	0.00029903
			Pulses, other	1.09	10	0.71	0.07	1.61	1.7549		65.672	2.57696	31.751	1.15248	0.0452231	0.557199	1.15248	0.00180893	0.00186979
			Nuts	7.54	34	0.56	0.69	0.278	2.09612		62.5618	3.79852	33.6397	1.31137	0.0796214	0.705127	1.31137	0.00318486	0.0023662
			Soybeans	0.01	0	0.01	0	1.8925	0.018925		63.3478	1.20151	35.4507	0.0119886	0.000227385	0.00670904	0.0119886	9.0954e-06	2.25136e-05
			Groundnuts (shelled equivalents)	0.53	6	0.26	0.45	2.497	1.32341		65.672	2.57696	31.751	0.86911	0.0341038	0.420196	0.86911	0.00136415	0.00141005
	Meat	Ruminant	Bovine meat	23.28	116	8.49	8.91	42.8	996.384	1067.43	10.5	73	16.5	104.62	727.36	164.403	104.62	29.0944	0.551689	119.043	30.6859	0.608193
			Mutton and goat meat	2.91	16	1.14	1.24	24.415	71.0477		20.3	56	23.7	14.4227	39.7867	16.8383	14.4227	1.59147	0.0565043
		Non-ruminant	Pig meat	9.61	45	2.52	3.78	7.282	69.98	463.397	47.5051	28.439	24.0559	33.2441	19.9017	16.8343	33.2441	0.796066	0.056491	239.245	2.55241	0.538061
			Poultry meat	42.59	183	13.54	14.02	6.092	259.458		53.86	5.83151	40.3085	139.744	15.1303	104.584	139.744	0.605214	0.350952
			Meat, other	1.85	6	0.76	0.36	6.687	12.371		49.4604	21.4829	29.0567	6.11872	2.65764	3.59459	6.11872	0.106305	0.0120624
			Offals, edible	4.52	13	2.19	0.39	26.9	121.588		49.4604	21.4829	29.0567	60.1379	26.1206	35.3294	60.1379	1.04482	0.118555
	Seafood		Freshwater fish	0.93	2	0.28	0.06	4.005	3.72465	6.47471	49.4604	21.4829	29.0567	1.84223	0.800162	1.08226	1.84223	0.0320065	0.00363174	7.65333	0.0458073	0.00470084
			Demersal fish	0	0	0	0	4.005	0		78.6427	5.32556	16.0317	0	0	0	0	0	0
			Pelagic fish	0.4	1	0.11	0.06	4.005	1.602		91.6865	7.21239	1.10113	1.46882	0.115542	0.0176401	1.46882	0.0046217	5.91951e-05
			Marine fish, other	1.18	2	0.36	0.09	4.005	4.7259		89.095	4.66193	6.24304	4.21054	0.220318	0.29504	4.21054	0.00881273	0.000990067
			Crustaceans	0.01	0	0	0	7.3405	0.073405		89.095	4.66193	6.24304	0.0654002	0.00342209	0.0045827	0.0654002	0.000136884	1.53782e-05
			Cephalopods	0	0	0	0	7.3405	0		89.095	4.66193	6.24304	0	0	0	0	0	0
			Molluscs, other	0.01	0	0	0	7.3405	0.073405		90.3737	7.81574	1.81055	0.0663388	0.00573714	0.00132903	0.0663388	0.000229486	4.45984e-06
			Aquatic animals, others	0	0	0	0	6.6476	0		89.095	4.66193	6.24304	0	0	0	0	0	0
	Dairy		Cream	0.03	0	0	0.02	2.781	0.08343	144.913	24.1	56.7	19.2	0.0201066	0.0473048	0.0160186	0.0201066	0.00189219	5.37536e-05	32.3236	3.39642	0.0928819
			Butter, ghee	0.13	3	0	0.29	2.781	0.36153		24.1	56.7	19.2	0.0871287	0.204988	0.0694138	0.0871287	0.0081995	0.000232932
			Milk (excluding butter) *includes cheese	40.13	71	4.02	3.5	3.6	144.468		22.3	58.6	19.1	32.2164	84.6582	27.5934	32.2164	3.38633	0.0925953
	Eggs		Eggs	7.38	26	2	1.74	4.507	33.2617	33.2617	41.5	6.5	52	13.8036	2.16201	17.2961	13.8036	0.0864803	0.0580405	13.8036	0.0864803	0.0580405
	Oils		Oilcrops, other	0	2	0	0.25	1.313	0	32.6341	61.4	13	25.6	0	0	0	0	0	0	20.1093	0.167276	0.0278256
			Soybean oil	2.24	77	0.02	8.71	6.117	13.7021		61.4	13	25.6	8.41308	1.78127	3.50773	8.41308	0.0712508	0.0117709
			Groundnut oil	0.06	2	0	0.17	5.752	0.34512		61.4	13	25.6	0.211904	0.0448656	0.0883507	0.211904	0.00179462	0.000296479
			Sunflowerseed oil	0.47	21	0.01	2.37	3.607	1.69529		61.4	13	25.6	1.04091	0.220388	0.433994	1.04091	0.00881551	0.00145636
			Rape and mustard oil	0	0	0	0	3.828	0		65.1	3.3	31.6	0	0	0	0	0	0
			Cottonseed oil	0.96	23	0	2.63	5.752	5.52192		61.4	13	25.6	3.39046	0.71785	1.41361	3.39046	0.028714	0.00474366
			Palmkernel oil	0.02	1	0	0.06	5.752	0.11504		56.142	28.9894	14.8685	0.0645858	0.0333494	0.0171048	0.0645858	0.00133398	5.73985e-05
			Sesame seed oil	0	0	0	0	5.752	0		61.4	13	25.6	0	0	0	0	0	0
			Palm oil	0	0	0	0	7.605	0		61.4923	12.9177	25.59	0	0	0	0	0	0
			Coconut oil	0	0	0	0	5.752	0		61.4	13	25.6	0	0	0	0	0	0
			Olive Oil	0.04	1	0	0.1	5.944	0.23776		89.1721	3.20831	7.61958	0.212016	0.00762807	0.0181163	0.212016	0.000305123	6.0793e-05
			Rice bran oil	0	0	0	0	5.752	0		61.4	13	25.6	0	0	0	0	0	0
			Maize germ oil	0.01	0	0	0.02	5.752	0.05752		61.4	13	25.6	0.0353173	0.0074776	0.0147251	0.0353173	0.000299104	4.94132e-05
			Oilcrops oil, other	0	0	0	0	5.752	0		61.4	13	25.6	0	0	0	0	0	0
			Fats, animals, raw	1.46	58	0.04	6.51	6.733	9.83018		61.4	13	25.6	6.03573	1.27792	2.51653	6.03573	0.0511169	0.00844472
			Fish, body oil	0	0	0	0	6.733	0		61.4	13	25.6	0	0	0	0	0	0
			Fish, liver oil	0	0	0	0	6.733	0		61.4	13	25.6	0	0	0	0	0	0
			Sunflower seed	0	0	0	0	1.313	0		61.4	13	25.6	0	0	0	0	0	0
			Rape and mustardseed	0	1	0	0	1.313	0		65.1	3.3	31.6	0	0	0	0	0	0
			Sesame seed	0.53	8	0.26	0.72	1.313	0.69589		61.4923	12.9177	25.59	0.427919	0.089893	0.178078	0.427919	0.00359572	0.000597578
			Palm kernels	0	0	0	0	1.313	0		56.142	28.9894	14.8685	0	0	0	0	0	0
			Olives (including preserved)	0.03	0	0	0.01	1.313	0.03939		89.1721	3.20831	7.61958	0.0351249	0.00126375	0.00300135	0.0351249	5.05501e-05	1.00717e-05
			Coconuts (including copra)	0.3	1	0.01	0.12	1.313	0.3939		61.4923	12.9177	25.59	0.242218	0	0.100799	0.242218	0	0.000338252
	Beverages		Coffee	2.14	3	0.33	0	16.477	35.2608	79.0995	53.6	0	46.4	18.8998	0	16.361	18.8998	0	0.0549027	59.6875	0.00413249	0.0648213
			Wine	0.65	1	0	0	1.585	1.03025		79.6583	3.35563	17.7687	0.820679	0.0345714	0.183062	0.820679	0.00138285	0.000614304
			Beer	35.54	35	0.29	0	1.109	39.4139		95	0	5	37.4432	0	1.97069	37.4432	0	0.00661306
			Beverages, fermented	0.08	0	0	0	1.347	0.10776		82	3	15	0.0883632	0.0032328	0.016164	0.0883632	0.000129312	5.42416e-05
			Beverages, alcoholic	0.55	4	0	0	1.347	0.74085		82	3	15	0.607497	0.0222255	0.111128	0.607497	0.00088902	0.000372911
			Tea (including mate)	0.21	0	0.06	0	12.124	2.54604		71.8	1.7	26.5	1.82806	0.0432827	0.674701	1.82806	0.00173131	0.0022641
	Other		Sugar cane	0	0	0	0	2.672	0	43.7233	74.1	1.1	24.8	0	0	0	0	0	0	18.3931	0.613797	0.0335668
			Sugar (non-centrifugal)	0	0	0	0	0.97	0		59.6	16.5	24	0	0	0	0	0	0
			Sugar beet	0	0	0	0	1.536	0		59.6	16.5	24	0	0	0	0	0	0
			Sugar (raw equivalent)	25.53	247	0	0	0.97	24.7641		30.4914	47.2261	22.2824	7.55093	11.6951	5.51804	7.55093	0.467805	0.0185169
			Sweeteners, other	1.58	6	0	0	0.97	1.5326		59.6	16.5	24	0.91343	0.252879	0.367824	0.91343	0.0101152	0.00123431
			Honey	0.06	1	0	0	0.97	0.0582		59.6	16.5	24	0.0346872	0.009603	0.013968	0.0346872	0.00038412	4.68725e-05
			Cocoa beans	0	12	0.28	1	18.681	0		59.6	16.5	24	0	0	0	0	0	0
			Pepper	0.01	0	0	0	12.124	0.12124		59.6	16.5	24	0.072259	0.0200046	0.0290976	0.072259	0.000800184	9.7643e-05
			Pimento	0.07	1	0.02	0.02	12.124	0.84868		59.6	16.5	24	0.505813	0.140032	0.203683	0.505813	0.00560129	0.000683501
			Cloves	0	0	0	0	12.124	0		59.6	16.5	24	0	0	0	0	0	0
			Spices, other	0.37	3	0.11	0.14	12.124	4.48588		59.6	16.5	24	2.67358	0.74017	1.07661	2.67358	0.0296068	0.00361279
			Infant food	0.47	5	0.19	0.04	2.781	1.30707		24.6	56.4	19	0.321539	0.737187	0.248343	0.321539	0.0294875	0.000833367
			Miscellaneous	1.55	2	0.05	0.02	6.84227	10.6055		59.6	16.5	24	6.32089	1.74991	2.54533	6.32089	0.0699965	0.00854136
Brazil	Grain products (non-rice)		Wheat	55.29	397	10.59	1.09	1.4	77.406	112.283	57.9	1.8	40.3	44.8181	1.39331	31.1946	44.8181	0.0557323	0.10468	69.2126	0.0837209	0.137561	211050000	2.27824e+11	1.45076e+10	5.45862e+08
			Barley	0	0	0	0	1.313	0		54.569	1.91155	43.5195	0	0	0	0	0	0
			Maize	28.45	244	5.4	0.99	0.988	28.1086		71.9	2.05597	26.1	20.2101	0.577906	7.33634	20.2101	0.0231162	0.0246186
			Millet	0	0	0	0	1.313	0		61.8	1.8	36.4	0	0	0	0	0	0
			Rye	0.01	0	0	0	1.4	0.014		73.3007	1.65211	25.0472	0.0102621	0.000231296	0.00350661	0.0102621	9.25184e-06	1.17671e-05
			Oats	3.93	19	0.79	0.31	1.575	6.18975		61.8	1.8	36.4	3.82527	0.111416	2.25307	3.82527	0.00445662	0.00756063
			Sorghum	0	0	0	0	1.313	0		61.8	1.8	36.4	0	0	0	0	0	0
			Cereals, other	0.43	4	0.12	0.02	1.313	0.56459		61.8	1.8	36.4	0.348917	0.0101626	0.205511	0.348917	0.000406505	0.000689633
	Rice		Rice (milled equivalent)	46.17	322	6.36	0.53	3.839	177.247	177.247	22.2	71.8	6	39.3488	127.263	10.6348	39.3488	5.09052	0.0356872	39.3488	5.09052	0.0356872
	Fruit		Oranges, mandarines	26.63	20	0.36	0.07	0.317	8.44171	58.4389	56.9055	1.22138	41.8731	4.8038	0.103105	3.53481	4.8038	0.00412421	0.0118618	41.0405	0.0563651	0.0536554
			Lemons, limes	4.84	2	0.04	0.04	0.317	1.53428		56.3759	0	43.6241	0.864965	0	0.669315	0.864965	0	0.00224602
			Grapefruit	0.34	0	0	0	0.317	0.10778		68.8513	2.47131	28.6774	0.0742079	0.00266357	0.0309085	0.0742079	0.000106543	0.00010372
			Citrus, other	0.01	0	0	0	0.317	0.00317		68.8513	2.47131	28.6774	0.00218259	7.83404e-05	0.000909074	0.00218259	3.13362e-06	3.05058e-06
			Bananas	27.09	47	0.59	0.07	0.678	18.367		79.4125	3.10136	17.4861	14.5857	0.569627	3.21168	14.5857	0.0227851	0.0107775
			Plantains	0	0	0	0	0.6632	0		68.8513	2.47131	28.6774	0	0	0	0	0	0
			Apples	5.03	7	0.04	0.04	0.357	1.79571		72.4477	2.06109	25.4912	1.30095	0.0370113	0.457747	1.30095	0.00148045	0.00153607
			Pineapples	10.04	8	0.05	0.02	0.6632	6.65853		68.8513	2.47131	28.6774	4.58448	0.164553	1.90949	4.58448	0.0065821	0.0064077
			Dates	0	0	0	0	0.6632	0		68.8513	2.47131	28.6774	0	0	0	0	0	0
			Grapes (excluding wine)	4.91	9	0.08	0.08	1.214	5.96074		68.8513	2.47131	28.6774	4.10405	0.147308	1.70939	4.10405	0.00589233	0.0057362
			Fruits, other	20.76	21	0.29	0.33	0.75	15.57		68.8513	2.47131	28.6774	10.7201	0.384782	4.46507	10.7201	0.0153913	0.0149835
	Vegetables		Cassava	30.6	72	0.49	0.19	0.987	30.2022	100.036	83.6105	0.362596	16.0269	25.2522	0.109512	4.84049	25.2522	0.00438048	0.0162433	69.6764	0.11116	0.0925514
			Potatoes	16.84	32	1.07	0.09	0.37	6.2308		59.711	1.6649	38.6241	3.72047	0.103737	2.40659	3.72047	0.00414947	0.00807581
			Sweet potatoes	1.02	2	0.03	0.01	0.365	0.3723		65.672	2.57696	31.751	0.244497	0.00959403	0.118209	0.244497	0.000383761	0.000396675
			Yams	0.58	2	0.02	0	0.365	0.2117		65.672	2.57696	31.751	0.139028	0.00545543	0.0672169	0.139028	0.000218217	0.00022556
			Roots, other	0	0	0	0	0.365	0		65.672	2.57696	31.751	0	0	0	0	0	0
			Tomatoes	18.58	11	0.41	0.15	1.427	26.5137		53.5199	4.20609	42.274	14.1901	1.11519	11.2084	14.1901	0.0446075	0.037612
			Onions	6.78	8	0.24	0.04	0.395	2.6781		71.3251	1.22109	27.4538	1.91016	0.0327021	0.735241	1.91016	0.00130808	0.00246725
			Vegetables, other	26.05	17	0.85	0.12	0.455	11.8528		65.672	2.57696	31.751	7.78394	0.305441	3.76337	7.78394	0.0122176	0.0126288
			Aquatic plants	0	0	0	0	0	0		65.672	2.57696	31.751	0	0	0	0	0	0
			Beans	13.21	122	7.96	0.58	1.61	21.2681		75.1226	5.04344	19.834	15.9771	1.07264	4.21832	15.9771	0.0429058	0.0141554
			Peas	0.18	2	0.11	0.01	0.896	0.16128		66.4257	5.15877	28.4155	0.107131	0.00832007	0.0458285	0.107131	0.000332803	0.000153787
			Pulses, other	0.14	1	0.09	0.01	1.61	0.2254		65.672	2.57696	31.751	0.148025	0.00580848	0.0715668	0.148025	0.000232339	0.000240157
			Nuts	0.7	4	0.11	0.39	0.278	0.1946		62.5618	3.79852	33.6397	0.121745	0.00739191	0.0654628	0.121745	0.000295676	0.000219674
			Soybeans	0	0	0	0	1.8925	0		63.3478	1.20151	35.4507	0	0	0	0	0	0
			Groundnuts (shelled equivalents)	0.05	1	0.03	0.04	2.497	0.12485		65.672	2.57696	31.751	0.0819915	0.00321734	0.0396412	0.0819915	0.000128694	0.000133024
	Meat	Ruminant	Bovine meat	37.47	157	14.03	10.76	42.8	1603.72	1618.36	10.5	73	16.5	168.39	1170.71	264.613	168.39	46.8285	0.887964	171.364	47.1566	0.899614
			Mutton and goat meat	0.6	3	0.23	0.28	24.415	14.649		20.3	56	23.7	2.97375	8.20344	3.47181	2.97375	0.328138	0.0116504
		Non-ruminant	Pig meat	13.52	103	3.61	9.69	7.282	98.4526	451.97	47.5051	28.439	24.0559	46.77	27.999	23.6837	46.77	1.11996	0.0794753	234.231	2.36333	0.532399
			Poultry meat	47.05	201	15.36	15.06	6.092	286.629		53.86	5.83151	40.3085	154.378	16.7148	115.536	154.378	0.668591	0.387704
			Meat, other	0.67	4	0.9	0.04	6.687	4.48029		49.4604	21.4829	29.0567	2.21597	0.962496	1.30182	2.21597	0.0384998	0.00436854
			Offals, edible	2.32	7	1.15	0.19	26.9	62.408		49.4604	21.4829	29.0567	30.8673	13.407	18.1337	30.8673	0.536282	0.0608513
	Seafood		Freshwater fish	4.5	8	1.3	0.3	4.005	18.0225	20.5975	49.4604	21.4829	29.0567	8.91401	3.87175	5.23674	8.91401	0.15487	0.017573	26.3189	0.201292	0.0243922
			Demersal fish	2.53	3	0.54	0.04	4.005	10.1326		78.6427	5.32556	16.0317	7.96859	0.539621	1.62444	7.96859	0.0215848	0.00545113
			Pelagic fish	0.94	2	0.34	0.1	4.005	3.7647		91.6865	7.21239	1.10113	3.45172	0.271525	0.0414543	3.45172	0.010861	0.000139108
			Marine fish, other	0.28	1	0.09	0.01	4.005	1.1214		89.095	4.66193	6.24304	0.999112	0.0522789	0.0700095	0.999112	0.00209116	0.000234931
			Crustaceans	0.54	1	0.14	0.01	7.3405	3.96387		89.095	4.66193	6.24304	3.53161	0.184793	0.247466	3.53161	0.00739172	0.000830423
			Cephalopods	0.06	0	0.02	0	7.3405	0.44043		89.095	4.66193	6.24304	0.392401	0.0205325	0.0274962	0.392401	0.000821302	9.22692e-05
			Molluscs, other	0.16	0	0.01	0	7.3405	1.17448		90.3737	7.81574	1.81055	1.06142	0.0917943	0.0212645	1.06142	0.00367177	7.13574e-05
			Aquatic animals, others	0	0	0	0	6.6476	0		89.095	4.66193	6.24304	0	0	0	0	0	0
	Dairy		Cream	0.01	0	0	0	2.781	0.02781	511.974	24.1	56.7	19.2	0.00670221	0.0157683	0.00533952	0.00670221	0.000630731	1.79179e-05	114.198	11.9995	0.328149
			Butter, ghee	0.54	11	0.01	1.2	2.781	1.50174		24.1	56.7	19.2	0.361919	0.851487	0.288334	0.361919	0.0340595	0.000967564
			Milk (excluding butter) *includes cheese	141.79	248	13.02	13.11	3.6	510.444		22.3	58.6	19.1	113.829	299.12	97.4948	113.829	11.9648	0.327164
	Eggs		Eggs	10.7	39	2.95	2.62	4.507	48.2249	48.2249	41.5	6.5	52	20.0133	3.13462	25.0769	20.0133	0.125385	0.0841508	20.0133	0.125385	0.0841508
	Oils		Oilcrops, other	2.38	22	2.79	0.22	1.313	3.12494	160.741	61.4	13	25.6	1.91871	0.406242	0.799985	1.91871	0.0162497	0.00268451	99.5403	0.753623	0.136307
			Soybean oil	12.7	308	0	34.79	6.117	77.6859		61.4	13	25.6	47.6991	10.0992	19.8876	47.6991	0.403967	0.0667369
			Groundnut oil	0.04	1	0	0.11	5.752	0.23008		61.4	13	25.6	0.141269	0.0299104	0.0589005	0.141269	0.00119642	0.000197653
			Sunflowerseed oil	0.42	10	0	1.14	3.607	1.51494		61.4	13	25.6	0.930173	0.196942	0.387825	0.930173	0.00787769	0.00130142
			Rape and mustard oil	0	0	0	0	3.828	0		65.1	3.3	31.6	0	0	0	0	0	0
			Cottonseed oil	1.58	38	0	4.34	5.752	9.08816		61.4	13	25.6	5.58013	1.18146	2.32657	5.58013	0.0472584	0.00780728
			Palmkernel oil	0	0	0	0	5.752	0		56.142	28.9894	14.8685	0	0	0	0	0	0
			Sesame seed oil	0	0	0	0.01	5.752	0		61.4	13	25.6	0	0	0	0	0	0
			Palm oil	2.82	68	0	7.72	7.605	21.4461		61.4923	12.9177	25.59	13.1877	2.77034	5.48805	13.1877	0.110814	0.0184163
			Coconut oil	0.01	0	0	0.04	5.752	0.05752		61.4	13	25.6	0.0353173	0.0074776	0.0147251	0.0353173	0.000299104	4.94132e-05
			Olive Oil	0.38	9	0	1.04	5.944	2.25872		89.1721	3.20831	7.61958	2.01415	0.0724667	0.172105	2.01415	0.00289867	0.000577534
			Rice bran oil	0.08	2	0	0.21	5.752	0.46016		61.4	13	25.6	0.282538	0.0598208	0.117801	0.282538	0.00239283	0.000395305
			Maize germ oil	0.08	2	0	0.22	5.752	0.46016		61.4	13	25.6	0.282538	0.0598208	0.117801	0.282538	0.00239283	0.000395305
			Oilcrops oil, other	2.48	49	0.04	5.5	5.752	14.265		61.4	13	25.6	8.75869	1.85444	3.65183	8.75869	0.0741778	0.0122545
			Fats, animals, raw	2.36	73	0.06	8.02	6.733	15.8899		61.4	13	25.6	9.75639	2.06568	4.06781	9.75639	0.0826274	0.0136504
			Fish, body oil	0	0	0	0	6.733	0		61.4	13	25.6	0	0	0	0	0	0
			Fish, liver oil	0	0	0	0	6.733	0		61.4	13	25.6	0	0	0	0	0	0
			Sunflower seed	0.04	0	0.01	0.03	1.313	0.05252		61.4	13	25.6	0.0322473	0.0068276	0.0134451	0.0322473	0.000273104	4.51179e-05
			Rape and mustardseed	0	0	0	0	1.313	0		65.1	3.3	31.6	0	0	0	0	0	0
			Sesame seed	0.05	1	0.02	0.07	1.313	0.06565		61.4923	12.9177	25.59	0.0403697	0.00848047	0.0167998	0.0403697	0.000339219	5.63753e-05
			Palm kernels	0	0	0	0	1.313	0		56.142	28.9894	14.8685	0	0	0	0	0	0
			Olives (including preserved)	0.51	2	0.02	0.16	1.313	0.66963		89.1721	3.20831	7.61958	0.597123	0.0214838	0.051023	0.597123	0.000859352	0.000171218
			Coconuts (including copra)	10.26	39	0.46	3.62	1.313	13.4714		61.4923	12.9177	25.59	8.28386	0	3.44732	8.28386	0	0.0115682
	Beverages		Coffee	5.67	7	1.04	0	16.477	93.4246	191.762	53.6	0	46.4	50.0756	0	43.349	50.0756	0	0.145466	137.158	0.0223417	0.181431
			Wine	1.67	3	0	0	1.585	2.64695		79.6583	3.35563	17.7687	2.10851	0.0888218	0.47033	2.10851	0.00355287	0.00157829
			Beer	62.55	62	0.51	0	1.109	69.3679		95	0	5	65.8996	0	3.4684	65.8996	0	0.0116389
			Beverages, fermented	0	0	0	0	1.347	0		82	3	15	0	0	0	0	0	0
			Beverages, alcoholic	1.27	10	0	0	1.347	1.71069		82	3	15	1.40277	0.0513207	0.256603	1.40277	0.00205283	0.000861086
			Tea (including mate)	2.03	2	0.56	0	12.124	24.6117		71.8	1.7	26.5	17.6712	0.418399	6.52211	17.6712	0.016736	0.0218863
	Other		Sugar cane	21.76	17	0.06	0.12	2.672	58.1427	100.768	74.1	1.1	24.8	43.0838	0.63957	14.4194	43.0838	0.0255828	0.0483872	57.3794	0.775997	0.0805139
			Sugar (non-centrifugal)	2.22	22	0.02	0.03	0.97	2.1534		59.6	16.5	24	1.28343	0.355311	0.516816	1.28343	0.0142124	0.00173428
			Sugar beet	0	0	0	0	1.536	0		59.6	16.5	24	0	0	0	0	0	0
			Sugar (raw equivalent)	39.31	383	0	0	0.97	38.1307		30.4914	47.2261	22.2824	11.6266	18.0077	8.49645	11.6266	0.720306	0.0285116
			Sweeteners, other	0.95	3	0	0	0.97	0.9215		59.6	16.5	24	0.549214	0.152048	0.22116	0.549214	0.0060819	0.000742148
			Honey	0.06	0	0	0	0.97	0.0582		59.6	16.5	24	0.0346872	0.009603	0.013968	0.0346872	0.00038412	4.68725e-05
			Cocoa beans	0	4	0.21	0.3	18.681	0		59.6	16.5	24	0	0	0	0	0	0
			Pepper	0.05	0	0.02	0	12.124	0.6062		59.6	16.5	24	0.361295	0.100023	0.145488	0.361295	0.00400092	0.000488215
			Pimento	0	0	0	0	12.124	0		59.6	16.5	24	0	0	0	0	0	0
			Cloves	0	0	0	0	12.124	0		59.6	16.5	24	0	0	0	0	0	0
			Spices, other	0.06	1	0.02	0.02	12.124	0.72744		59.6	16.5	24	0.433554	0.120028	0.174586	0.433554	0.0048011	0.000585858
			Infant food	0.01	0	0	0	2.781	0.02781		24.6	56.4	19	0.00684126	0.0156848	0.0052839	0.00684126	0.000627394	1.77312e-05
			Miscellaneous	0	0	0	0	6.84227	0		59.6	16.5	24	0	0	0	0	0	0
Chile	Grain products (non-rice)		Wheat	106.3	845	22.95	2.72	1.4	148.82	173.157	57.9	1.8	40.3	86.1668	2.67876	59.9745	86.1668	0.10715	0.201257	103.311	0.126861	0.223777	18952000	1.57493e+10	7.80559e+08	3.52603e+07
			Barley	0.75	7	0.2	0.04	1.313	0.98475		54.569	1.91155	43.5195	0.537368	0.018824	0.428558	0.537368	0.000752961	0.00143811
			Maize	21.4	201	5.23	2.39	0.988	21.1432		71.9	2.05597	26.1	15.202	0.434699	5.51838	15.202	0.0173879	0.018518
			Millet	0	0	0	0	1.313	0		61.8	1.8	36.4	0	0	0	0	0	0
			Rye	0.25	2	0.05	0.01	1.4	0.35		73.3007	1.65211	25.0472	0.256552	0.0057824	0.0876652	0.256552	0.000231296	0.000294179
			Oats	0.98	6	0.24	0.09	1.575	1.5435		61.8	1.8	36.4	0.953883	0.027783	0.561834	0.953883	0.00111132	0.00188535
			Sorghum	0	0	0	0	1.313	0		61.8	1.8	36.4	0	0	0	0	0	0
			Cereals, other	0.24	2	0.07	0.02	1.313	0.31512		61.8	1.8	36.4	0.194744	0.00567216	0.114704	0.194744	0.000226886	0.000384912
	Rice		Rice (milled equivalent)	13.35	87	1.71	0.14	3.839	51.2507	51.2507	22.2	71.8	6	11.3776	36.798	3.07504	11.3776	1.47192	0.0103189	11.3776	1.47192	0.0103189
	Fruit		Oranges, mandarines	2.32	2	0.03	0.01	0.317	0.73544	35.0473	56.9055	1.22138	41.8731	0.418506	0.00898251	0.307952	0.418506	0.0003593	0.0010334	24.8106	0.0341336	0.0314879
			Lemons, limes	4.29	2	0.04	0.04	0.317	1.35993		56.3759	0	43.6241	0.766673	0	0.593257	0.766673	0	0.00199079
			Grapefruit	0.03	0	0	0	0.317	0.00951		68.8513	2.47131	28.6774	0.00654776	0.000235021	0.00272722	0.00654776	9.40085e-06	9.15175e-06
			Citrus, other	0.06	0	0	0	0.317	0.01902		68.8513	2.47131	28.6774	0.0130955	0.000470042	0.00545444	0.0130955	1.88017e-05	1.83035e-05
			Bananas	11.01	19	0.24	0.03	0.678	7.46478		79.4125	3.10136	17.4861	5.92797	0.231509	1.3053	5.92797	0.00926037	0.0043802
			Plantains	0.66	1	0.01	0.01	0.6632	0.437712		68.8513	2.47131	28.6774	0.30137	0.0108172	0.125524	0.30137	0.000432688	0.000421223
			Apples	11.62	18	0.12	0.1	0.357	4.14834		72.4477	2.06109	25.4912	3.00538	0.0855012	1.05746	3.00538	0.00342005	0.00354852
			Pineapples	2.53	3	0.02	0.01	0.6632	1.6779		68.8513	2.47131	28.6774	1.15525	0.0414659	0.481177	1.15525	0.00165864	0.00161469
			Dates	0.01	0	0	0	0.6632	0.006632		68.8513	2.47131	28.6774	0.00456622	0.000163897	0.00190189	0.00456622	6.55588e-06	6.38217e-06
			Grapes (excluding wine)	4.29	7	0.06	0.05	1.214	5.20806		68.8513	2.47131	28.6774	3.58582	0.128707	1.49354	3.58582	0.00514828	0.00501187
			Fruits, other	18.64	23	0.31	0.21	0.75	13.98		68.8513	2.47131	28.6774	9.62541	0.345489	4.0091	9.62541	0.0138195	0.0134534
	Vegetables		Cassava	0.1	1	0.01	0	0.987	0.0987	73.6482	83.6105	0.362596	16.0269	0.0825235	0.000357883	0.0158186	0.0825235	1.43153e-05	5.30825e-05	46.1104	0.0750527	0.0861124
			Potatoes	57.5	116	2.91	0.28	0.37	21.275		59.711	1.6649	38.6241	12.7035	0.354208	8.21728	12.7035	0.0141683	0.0275748
			Sweet potatoes	0.93	2	0.03	0.01	0.365	0.33945		65.672	2.57696	31.751	0.222924	0.0087475	0.107779	0.222924	0.0003499	0.000361674
			Yams	0	0	0	0	0.365	0		65.672	2.57696	31.751	0	0	0	0	0	0
			Roots, other	0.01	0	0	0	0.365	0.00365		65.672	2.57696	31.751	0.00239703	9.40592e-05	0.00115891	0.00239703	3.76237e-06	3.88897e-06
			Tomatoes	9.18	5	0.2	0.06	1.427	13.0999		53.5199	4.20609	42.274	7.01104	0.550991	5.53783	7.01104	0.0220397	0.0185833
			Onions	18.18	20	0.65	0.1	0.395	7.1811		71.3251	1.22109	27.4538	5.12193	0.0876878	1.97149	5.12193	0.00350751	0.00661573
			Vegetables, other	49.69	43	1.76	0.32	0.455	22.609		65.672	2.57696	31.751	14.8478	0.582624	7.17857	14.8478	0.023305	0.0240892
			Aquatic plants	0	0	0	0	0	0		65.672	2.57696	31.751	0	0	0	0	0	0
			Beans	1.29	12	0.78	0.06	1.61	2.0769		75.1226	5.04344	19.834	1.56022	0.104747	0.411932	1.56022	0.00418989	0.00138232
			Peas	0.35	3	0.22	0.02	0.896	0.3136		66.4257	5.15877	28.4155	0.208311	0.0161779	0.0891111	0.208311	0.000647116	0.00029903
			Pulses, other	2.12	21	1.52	0.27	1.61	3.4132		65.672	2.57696	31.751	2.24152	0.0879569	1.08373	2.24152	0.00351828	0.00363666
			Nuts	1.17	10	0.33	0.93	0.278	0.32526		62.5618	3.79852	33.6397	0.203489	0.0123551	0.109416	0.203489	0.000494202	0.000367169
			Soybeans	0.18	0	0.03	0	1.8925	0.34065		63.3478	1.20151	35.4507	0.215794	0.00409293	0.120763	0.215794	0.000163717	0.000405244
			Groundnuts (shelled equivalents)	1.03	16	0.71	1.29	2.497	2.57191		65.672	2.57696	31.751	1.68903	0.0662772	0.816608	1.68903	0.00265109	0.00274029
	Meat	Ruminant	Bovine meat	22.05	116	9.55	8.32	42.8	943.74	956.68	10.5	73	16.5	99.0927	688.93	155.717	99.0927	27.5572	0.522541	101.72	27.8471	0.532832
			Mutton and goat meat	0.53	2	0.2	0.17	24.415	12.9399		20.3	56	23.7	2.62681	7.24637	3.06677	2.62681	0.289855	0.0102912
		Non-ruminant	Pig meat	27.43	194	8.09	17.64	7.282	199.745	469.695	47.5051	28.439	24.0559	94.8891	56.8057	48.0505	94.8891	2.27223	0.161243	239.356	3.03396	0.518423
			Poultry meat	40.85	172	13.56	12.74	6.092	248.858		53.86	5.83151	40.3085	134.035	14.5122	100.311	134.035	0.580488	0.336614
			Meat, other	0.66	4	0.81	0.03	6.687	4.41342		49.4604	21.4829	29.0567	2.1829	0.94813	1.28239	2.1829	0.0379252	0.00430333
			Offals, edible	0.62	2	0.29	0.06	26.9	16.678		49.4604	21.4829	29.0567	8.24901	3.58292	4.84607	8.24901	0.143317	0.016262
	Seafood		Freshwater fish	1.31	2	0.33	0.07	4.005	5.24655	54.4018	49.4604	21.4829	29.0567	2.59497	1.12711	1.52447	2.59497	0.0450844	0.00511568	50.8125	0.174824	0.0149843
			Demersal fish	1.94	2	0.36	0.03	4.005	7.7697		78.6427	5.32556	16.0317	6.11031	0.41378	1.24561	6.11031	0.0165512	0.00417991
			Pelagic fish	4.72	16	2.13	0.75	4.005	18.9036		91.6865	7.21239	1.10113	17.332	1.3634	0.208154	17.332	0.054536	0.000698502
			Marine fish, other	0.16	0	0.05	0.01	4.005	0.6408		89.095	4.66193	6.24304	0.570921	0.0298737	0.0400054	0.570921	0.00119495	0.000134246
			Crustaceans	2.12	2	0.41	0.02	7.3405	15.5619		89.095	4.66193	6.24304	13.8648	0.725483	0.971533	13.8648	0.0290193	0.00326018
			Cephalopods	0.63	1	0.23	0.01	7.3405	4.62451		89.095	4.66193	6.24304	4.12021	0.215592	0.28871	4.12021	0.00862367	0.000968827
			Molluscs, other	0.75	0	0.06	0.01	7.3405	5.50537		90.3737	7.81574	1.81055	4.97541	0.430286	0.0996773	4.97541	0.0172114	0.000334488
			Aquatic animals, others	0.21	0	0	0	6.6476	1.396		89.095	4.66193	6.24304	1.24376	0.0650804	0.0871526	1.24376	0.00260322	0.000292458
	Dairy		Cream	0.06	0	0	0.03	2.781	0.16686	295.617	24.1	56.7	19.2	0.0402133	0.0946096	0.0320371	0.0402133	0.00378438	0.000107507	66.0138	6.92543	0.18949
			Butter, ghee	1.76	35	0.04	3.91	2.781	4.89456		24.1	56.7	19.2	1.17959	2.77522	0.939756	1.17959	0.111009	0.00315354
			Milk (excluding butter) *includes cheese	80.71	166	10.42	10	3.6	290.556		22.3	58.6	19.1	64.794	170.266	55.4962	64.794	6.81063	0.186229
	Eggs		Eggs	10.61	38	2.91	2.53	4.507	47.8193	47.8193	41.5	6.5	52	19.845	3.10825	24.866	19.845	0.12433	0.083443	19.845	0.12433	0.083443
	Oils		Oilcrops, other	0	0	0	0.01	1.313	0	44.8986	61.4	13	25.6	0	0	0	0	0	0	28.9214	0.188352	0.0377223
			Soybean oil	2.06	50	0	5.64	6.117	12.601		61.4	13	25.6	7.73703	1.63813	3.22586	7.73703	0.0655253	0.010825
			Groundnut oil	0	0	0	0	5.752	0		61.4	13	25.6	0	0	0	0	0	0
			Sunflowerseed oil	1.31	32	0	3.59	3.607	4.72517		61.4	13	25.6	2.90125	0.614272	1.20964	2.90125	0.0245709	0.00405921
			Rape and mustard oil	1.94	47	0	5.32	3.828	7.42632		65.1	3.3	31.6	4.83453	0.245069	2.34672	4.83453	0.00980274	0.00787489
			Cottonseed oil	0	0	0	0	5.752	0		61.4	13	25.6	0	0	0	0	0	0
			Palmkernel oil	0	0	0	0	5.752	0		56.142	28.9894	14.8685	0	0	0	0	0	0
			Sesame seed oil	0	0	0	0.01	5.752	0		61.4	13	25.6	0	0	0	0	0	0
			Palm oil	0	0	0	0	7.605	0		61.4923	12.9177	25.59	0	0	0	0	0	0
			Coconut oil	0	0	0	0	5.752	0		61.4	13	25.6	0	0	0	0	0	0
			Olive Oil	0.3	7	0	0.81	5.944	1.7832		89.1721	3.20831	7.61958	1.59012	0.0572106	0.135872	1.59012	0.00228842	0.000455948
			Rice bran oil	0	0	0	0	5.752	0		61.4	13	25.6	0	0	0	0	0	0
			Maize germ oil	0.05	1	0	0.15	5.752	0.2876		61.4	13	25.6	0.176586	0.037388	0.0736256	0.176586	0.00149552	0.000247066
			Oilcrops oil, other	1.76	35	0.03	3.9	5.752	10.1235		61.4	13	25.6	6.21584	1.31606	2.59162	6.21584	0.0526423	0.00869672
			Fats, animals, raw	0.83	56	0.16	6.2	6.733	5.58839		61.4	13	25.6	3.43127	0.726491	1.43063	3.43127	0.0290596	0.00480076
			Fish, body oil	0	0	0	0	6.733	0		61.4	13	25.6	0	0	0	0	0	0
			Fish, liver oil	0	0	0	0	6.733	0		61.4	13	25.6	0	0	0	0	0	0
			Sunflower seed	0	0	0	0	1.313	0		61.4	13	25.6	0	0	0	0	0	0
			Rape and mustardseed	0	1	0	0	1.313	0		65.1	3.3	31.6	0	0	0	0	0	0
			Sesame seed	0.04	1	0.02	0.06	1.313	0.05252		61.4923	12.9177	25.59	0.0322958	0.00678438	0.0134399	0.0322958	0.000271375	4.51002e-05
			Palm kernels	0	0	0	0	1.313	0		56.142	28.9894	14.8685	0	0	0	0	0	0
			Olives (including preserved)	1.6	4	0.05	0.45	1.313	2.1008		89.1721	3.20831	7.61958	1.87333	0.0674001	0.160072	1.87333	0.00269601	0.000537155
			Coconuts (including copra)	0.16	2	0.02	0.21	1.313	0.21008		61.4923	12.9177	25.59	0.129183	0	0.0537594	0.129183	0	0.000180401
	Beverages		Coffee	0.71	1	0.06	0	16.477	11.6987	113.343	53.6	0	46.4	6.27049	0	5.42818	6.27049	0	0.0182154	94.8911	0.0474148	0.0585807
			Wine	15.33	29	0	0	1.585	24.298		79.6583	3.35563	17.7687	19.3554	0.815352	4.31746	19.3554	0.0326141	0.0144881
			Beer	52.18	51	0.43	0	1.109	57.8676		95	0	5	54.9742	0	2.89338	54.9742	0	0.00970933
			Beverages, fermented	0.01	0	0	0	1.347	0.01347		82	3	15	0.0110454	0.0004041	0.0020205	0.0110454	1.6164e-05	6.7802e-06
			Beverages, alcoholic	2.21	18	0	0	1.347	2.97687		82	3	15	2.44103	0.0893061	0.44653	2.44103	0.00357224	0.00149842
			Tea (including mate)	1.36	1	0.37	0	12.124	16.4886		71.8	1.7	26.5	11.8388	0.280307	4.36949	11.8388	0.0112123	0.0146627
	Other		Sugar cane	0	0	0	0	2.672	0	94.059	74.1	1.1	24.8	0	0	0	0	0	0	43.8389	1.13676	0.0733325
			Sugar (non-centrifugal)	0	0	0	0	0.97	0		59.6	16.5	24	0	0	0	0	0	0
			Sugar beet	0	0	0	0	1.536	0		59.6	16.5	24	0	0	0	0	0	0
			Sugar (raw equivalent)	43.28	420	0	0	0.97	41.9816		30.4914	47.2261	22.2824	12.8008	19.8263	9.35452	12.8008	0.793052	0.031391
			Sweeteners, other	3.01	23	0	0	0.97	2.9197		59.6	16.5	24	1.74014	0.48175	0.700728	1.74014	0.01927	0.00235144
			Honey	0.16	1	0	0	0.97	0.1552		59.6	16.5	24	0.0924992	0.025608	0.037248	0.0924992	0.00102432	0.000124993
			Cocoa beans	0.19	13	0.3	1.16	18.681	3.54939		59.6	16.5	24	2.11544	0.585649	0.851854	2.11544	0.023426	0.00285857
			Pepper	0.03	0	0.01	0	12.124	0.36372		59.6	16.5	24	0.216777	0.0600138	0.0872928	0.216777	0.00240055	0.000292929
			Pimento	0.04	0	0.01	0.02	12.124	0.48496		59.6	16.5	24	0.289036	0.0800184	0.11639	0.289036	0.00320074	0.000390572
			Cloves	0	0	0	0	12.124	0		59.6	16.5	24	0	0	0	0	0	0
			Spices, other	0.18	2	0.05	0.05	12.124	2.18232		59.6	16.5	24	1.30066	0.360083	0.523757	1.30066	0.0144033	0.00175757
			Infant food	0	0	0	0	2.781	0		24.6	56.4	19	0	0	0	0	0	0
			Miscellaneous	6.2	7	0.2	0.08	6.84227	42.4221		59.6	16.5	24	25.2836	6.99965	10.1813	25.2836	0.279986	0.0341654
Colombia	Grain products (non-rice)		Wheat	37.06	265	7.02	0.89	1.4	51.884	93.4497	57.9	1.8	40.3	30.0408	0.933912	20.9093	30.0408	0.0373565	0.0701653	59.385	0.0711919	0.108409	50339000	4.08687e+10	2.04471e+09	8.58977e+07
			Barley	1.3	8	0.22	0.03	1.313	1.7069		54.569	1.91155	43.5195	0.931438	0.0326283	0.742834	0.931438	0.00130513	0.00249273
			Maize	37.88	302	6.97	1.29	0.988	37.4254		71.9	2.05597	26.1	26.9089	0.769457	9.76804	26.9089	0.0307783	0.0327787
			Millet	0	0	0	0	1.313	0		61.8	1.8	36.4	0	0	0	0	0	0
			Rye	0	0	0	0	1.4	0		73.3007	1.65211	25.0472	0	0	0	0	0	0
			Oats	1.52	10	0.4	0.16	1.575	2.394		61.8	1.8	36.4	1.47949	0.043092	0.871416	1.47949	0.00172368	0.00292421
			Sorghum	0.03	0	0.01	0	1.313	0.03939		61.8	1.8	36.4	0.024343	0.00070902	0.014338	0.024343	2.83608e-05	4.8114e-05
			Cereals, other	0	1	0.03	0	1.313	0		61.8	1.8	36.4	0	0	0	0	0	0
	Rice		Rice (milled equivalent)	58.94	359	7.09	0.59	3.839	226.271	226.271	22.2	71.8	6	50.2321	162.462	13.5762	50.2321	6.49849	0.0455579	50.2321	6.49849	0.0455579
	Fruit		Oranges, mandarines	7.24	7	0.12	0.02	0.317	2.29508	109.719	56.9055	1.22138	41.8731	1.30603	0.0280316	0.961022	1.30603	0.00112126	0.00322491	77.6325	0.112165	0.0982618
			Lemons, limes	2.67	1	0.04	0.01	0.317	0.84639		56.3759	0	43.6241	0.47716	0	0.36923	0.47716	0	0.00123903
			Grapefruit	0	0	0	0	0.317	0		68.8513	2.47131	28.6774	0	0	0	0	0	0
			Citrus, other	11.12	8	0.15	0.06	0.317	3.52504		68.8513	2.47131	28.6774	2.42704	0.0871145	1.01089	2.42704	0.00348458	0.00339225
			Bananas	34.08	58	0.75	0.09	0.678	23.1062		79.4125	3.10136	17.4861	18.3492	0.716607	4.04039	18.3492	0.0286643	0.0135583
			Plantains	55.85	139	1.22	0.15	0.6632	37.0397		68.8513	2.47131	28.6774	25.5023	0.915365	10.622	25.5023	0.0366146	0.0356444
			Apples	2.28	3	0.02	0.02	0.357	0.81396		72.4477	2.06109	25.4912	0.589696	0.0167765	0.207488	0.589696	0.000671059	0.000696268
			Pineapples	13.33	11	0.07	0.04	0.6632	8.84046		68.8513	2.47131	28.6774	6.08677	0.218475	2.53521	6.08677	0.00873899	0.00850743
			Dates	0	0	0	0	0.6632	0		68.8513	2.47131	28.6774	0	0	0	0	0	0
			Grapes (excluding wine)	1.27	2	0.02	0.01	1.214	1.54178		68.8513	2.47131	28.6774	1.06154	0.0381021	0.442143	1.06154	0.00152408	0.0014837
			Fruits, other	42.28	51	0.59	1.61	0.75	31.71		68.8513	2.47131	28.6774	21.8327	0.783651	9.09361	21.8327	0.031346	0.0305155
	Vegetables		Cassava	38.04	91	0.65	0.28	0.987	37.5455	94.5401	83.6105	0.362596	16.0269	31.3919	0.136139	6.01739	31.3919	0.00544554	0.0201926	66.8758	0.0736436	0.086655
			Potatoes	32.25	62	1.58	0.16	0.37	11.9325		59.711	1.6649	38.6241	7.12501	0.198664	4.60882	7.12501	0.00794658	0.0154659
			Sweet potatoes	0	0	0	0	0.365	0		65.672	2.57696	31.751	0	0	0	0	0	0
			Yams	5.59	14	0.28	0.03	0.365	2.04035		65.672	2.57696	31.751	1.33994	0.0525791	0.647832	1.33994	0.00210316	0.00217393
			Roots, other	1.58	4	0.07	0.01	0.365	0.5767		65.672	2.57696	31.751	0.378731	0.0148613	0.183108	0.378731	0.000594454	0.000614457
			Tomatoes	11.12	6	0.25	0.09	1.427	15.8682		53.5199	4.20609	42.274	8.49267	0.667432	6.70813	8.49267	0.0266973	0.0225105
			Onions	11.55	13	0.41	0.06	0.395	4.56225		71.3251	1.22109	27.4538	3.25403	0.0557093	1.25251	3.25403	0.00222837	0.00420306
			Vegetables, other	20.84	15	0.65	0.12	0.455	9.4822		65.672	2.57696	31.751	6.22715	0.244353	3.0107	6.22715	0.00977411	0.010103
			Aquatic plants	0	0	0	0	0	0		65.672	2.57696	31.751	0	0	0	0	0	0
			Beans	3.07	28	1.85	0.13	1.61	4.9427		75.1226	5.04344	19.834	3.71308	0.249282	0.980335	3.71308	0.00997129	0.00328972
			Peas	1.78	17	1.1	0.1	0.896	1.59488		66.4257	5.15877	28.4155	1.05941	0.0822762	0.453193	1.05941	0.00329105	0.00152078
			Pulses, other	1.7	16	1.07	0.09	1.61	2.737		65.672	2.57696	31.751	1.79744	0.0705315	0.869026	1.79744	0.00282126	0.00291619
			Nuts	1.27	9	0.28	0.77	0.278	0.35306		62.5618	3.79852	33.6397	0.220881	0.013411	0.118768	0.220881	0.000536441	0.000398551
			Soybeans	0.73	7	0.75	0.36	1.8925	1.38153		63.3478	1.20151	35.4507	0.875166	0.0165991	0.48976	0.875166	0.000663965	0.00164349
			Groundnuts (shelled equivalents)	0.61	7	0.3	0.56	2.497	1.52317		65.672	2.57696	31.751	1.0003	0.0392515	0.483622	1.0003	0.00157006	0.00162289
	Meat	Ruminant	Bovine meat	17.07	99	6.49	7.95	42.8	730.596	734.747	10.5	73	16.5	76.7126	533.335	120.548	76.7126	21.3334	0.404525	77.5551	21.4264	0.407826
			Mutton and goat meat	0.17	1	0.07	0.04	24.415	4.15055		20.3	56	23.7	0.842562	2.32431	0.98368	0.842562	0.0929723	0.00330094
		Non-ruminant	Pig meat	9.44	56	2.86	4.86	7.282	68.7421	366.94	47.5051	28.439	24.0559	32.656	19.5496	16.5365	32.656	0.781984	0.0554917	189.422	2.02444	0.425861
			Poultry meat	34.61	120	10.34	8.32	6.092	210.844		53.86	5.83151	40.3085	113.561	12.2954	84.9881	113.561	0.491816	0.285195
			Meat, other	0.11	0	0.05	0.01	6.687	0.73557		49.4604	21.4829	29.0567	0.363816	0.158022	0.213732	0.363816	0.00632087	0.000717222
			Offals, edible	3.22	9	1.62	0.23	26.9	86.618		49.4604	21.4829	29.0567	42.8416	18.608	25.1683	42.8416	0.744322	0.0844575
	Seafood		Freshwater fish	3.56	6	0.98	0.22	4.005	14.2578	14.5442	49.4604	21.4829	29.0567	7.05197	3.06299	4.14284	7.05197	0.122519	0.0139022	20.1808	0.161363	0.0153933
			Demersal fish	0.26	0	0.06	0.01	4.005	1.0413		78.6427	5.32556	16.0317	0.818907	0.0554551	0.166938	0.818907	0.0022182	0.000560195
			Pelagic fish	2.62	7	0.83	0.33	4.005	10.4931		91.6865	7.21239	1.10113	9.62075	0.756803	0.115543	9.62075	0.0302721	0.000387728
			Marine fish, other	0.22	1	0.09	0.03	4.005	0.8811		89.095	4.66193	6.24304	0.785016	0.0410763	0.0550074	0.785016	0.00164305	0.000184589
			Crustaceans	0.12	0	0.05	0	7.3405	0.88086		89.095	4.66193	6.24304	0.784802	0.0410651	0.0549924	0.784802	0.0016426	0.000184538
			Cephalopods	0.09	0	0.04	0	7.3405	0.660645		89.095	4.66193	6.24304	0.588602	0.0307988	0.0412443	0.588602	0.00123195	0.000138404
			Molluscs, other	0.08	0	0.01	0	7.3405	0.58724		90.3737	7.81574	1.81055	0.530711	0.0458971	0.0106322	0.530711	0.00183589	3.56787e-05
			Aquatic animals, others	0	0	0	0	6.6476	0		89.095	4.66193	6.24304	0	0	0	0	0	0
	Dairy		Cream	0.02	0	0	0.01	2.781	0.05562	363.056	24.1	56.7	19.2	0.0134044	0.0315365	0.010679	0.0134044	0.00126146	3.58357e-05	80.9816	8.5092	0.232701
			Butter, ghee	0.38	7	0.01	0.84	2.781	1.05678		24.1	56.7	19.2	0.254684	0.599194	0.202902	0.254684	0.0239678	0.000680878
			Milk (excluding butter) *includes cheese	100.54	165	9.98	8.32	3.6	361.944		22.3	58.6	19.1	80.7135	212.099	69.1313	80.7135	8.48397	0.231984
	Eggs		Eggs	14.01	50	3.8	3.3	4.507	63.1431	63.1431	41.5	6.5	52	26.2044	4.1043	32.8344	26.2044	0.164172	0.110183	26.2044	0.164172	0.110183
	Oils		Oilcrops, other	0	0	0	0	1.313	0	116.833	61.4	13	25.6	0	0	0	0	0	0	71.7702	0.608854	0.0989027
			Soybean oil	4.38	106	0	11.99	6.117	26.7925		61.4	13	25.6	16.4506	3.48302	6.85887	16.4506	0.139321	0.0230163
			Groundnut oil	0	0	0	0	5.752	0		61.4	13	25.6	0	0	0	0	0	0
			Sunflowerseed oil	0.39	9	0	1.06	3.607	1.40673		61.4	13	25.6	0.863732	0.182875	0.360123	0.863732	0.007315	0.00120847
			Rape and mustard oil	0.24	6	0	0.67	3.828	0.91872		65.1	3.3	31.6	0.598087	0.0303178	0.290316	0.598087	0.00121271	0.000974213
			Cottonseed oil	0.12	3	0	0.34	5.752	0.69024		61.4	13	25.6	0.423807	0.0897312	0.176701	0.423807	0.00358925	0.000592958
			Palmkernel oil	0.64	16	0	1.76	5.752	3.68128		56.142	28.9894	14.8685	2.06675	1.06718	0.547352	2.06675	0.0426873	0.00183675
			Sesame seed oil	0.03	1	0	0.08	5.752	0.17256		61.4	13	25.6	0.105952	0.0224328	0.0441754	0.105952	0.000897312	0.000148239
			Palm oil	7.49	181	0	20.51	7.605	56.9615		61.4923	12.9177	25.59	35.0269	7.35811	14.5764	35.0269	0.294324	0.0489142
			Coconut oil	0	0	0	0.01	5.752	0		61.4	13	25.6	0	0	0	0	0	0
			Olive Oil	0.08	2	0	0.21	5.944	0.47552		89.1721	3.20831	7.61958	0.424031	0.0152561	0.0362326	0.424031	0.000610246	0.000121586
			Rice bran oil	0	0	0	0	5.752	0		61.4	13	25.6	0	0	0	0	0	0
			Maize germ oil	0.24	6	0	0.65	5.752	1.38048		61.4	13	25.6	0.847615	0.179462	0.353403	0.847615	0.0071785	0.00118592
			Oilcrops oil, other	2.54	50	0.04	5.63	5.752	14.6101		61.4	13	25.6	8.97059	1.89931	3.74018	8.97059	0.0759724	0.0125509
			Fats, animals, raw	1.02	23	0.04	2.54	6.733	6.86766		61.4	13	25.6	4.21674	0.892796	1.75812	4.21674	0.0357118	0.00589973
			Fish, body oil	0	0	0	0	6.733	0		61.4	13	25.6	0	0	0	0	0	0
			Fish, liver oil	0	0	0	0	6.733	0		61.4	13	25.6	0	0	0	0	0	0
			Sunflower seed	0	0	0	0	1.313	0		61.4	13	25.6	0	0	0	0	0	0
			Rape and mustardseed	0	0	0	0	1.313	0		65.1	3.3	31.6	0	0	0	0	0	0
			Sesame seed	0	0	0	0	1.313	0		61.4923	12.9177	25.59	0	0	0	0	0	0
			Palm kernels	0	0	0	0	1.313	0		56.142	28.9894	14.8685	0	0	0	0	0	0
			Olives (including preserved)	0.02	0	0	0.01	1.313	0.02626		89.1721	3.20831	7.61958	0.0234166	0.000842502	0.0020009	0.0234166	3.37001e-05	6.71444e-06
			Coconuts (including copra)	2.17	8	0.1	0.75	1.313	2.84921		61.4923	12.9177	25.59	1.75205	0	0.729112	1.75205	0	0.00244669
	Beverages		Coffee	0	0	0	0	16.477	0	54.2249	53.6	0	46.4	0	0	0	0	0	0	50.9531	0.00459485	0.0106108
			Wine	0.41	1	0	0	1.585	0.64985		79.6583	3.35563	17.7687	0.517659	0.0218066	0.11547	0.517659	0.000872262	0.000387484
			Beer	45.37	45	0.37	0	1.109	50.3153		95	0	5	47.7996	0	2.51577	47.7996	0	0.00844217
			Beverages, fermented	0.01	0	0	0	1.347	0.01347		82	3	15	0.0110454	0.0004041	0.0020205	0.0110454	1.6164e-05	6.7802e-06
			Beverages, alcoholic	2.14	17	0	0	1.347	2.88258		82	3	15	2.36372	0.0864774	0.432387	2.36372	0.0034591	0.00145096
			Tea (including mate)	0.03	0	0	0	12.124	0.36372		71.8	1.7	26.5	0.261151	0.00618324	0.0963858	0.261151	0.00024733	0.000323442
	Other		Sugar cane	0	0	0	0.56	2.672	0	84.4091	74.1	1.1	24.8	0	0	0	0	0	0	40.6766	0.964348	0.0660241
			Sugar (non-centrifugal)	24.81	239	0.68	0	0.97	24.0657		59.6	16.5	24	14.3432	3.97084	5.77577	14.3432	0.158834	0.0193818
			Sugar beet	0.56	1	0.02	0	1.536	0.86016		59.6	16.5	24	0.512655	0.141926	0.206438	0.512655	0.00567706	0.000692746
			Sugar (raw equivalent)	33.49	326	0	0	0.97	32.4853		30.4914	47.2261	22.2824	9.90523	15.3416	7.23851	9.90523	0.613662	0.0242903
			Sweeteners, other	15.3	25	0	0	0.97	14.841		59.6	16.5	24	8.84524	2.44877	3.56184	8.84524	0.0979506	0.0119525
			Honey	0.05	0	0	0	0.97	0.0485		59.6	16.5	24	0.028906	0.0080025	0.01164	0.028906	0.0003201	3.90604e-05
			Cocoa beans	0	5	0.19	0.42	18.681	0		59.6	16.5	24	0	0	0	0	0	0
			Pepper	0.01	0	0	0	12.124	0.12124		59.6	16.5	24	0.072259	0.0200046	0.0290976	0.072259	0.000800184	9.7643e-05
			Pimento	0	0	0	0	12.124	0		59.6	16.5	24	0	0	0	0	0	0
			Cloves	0	0	0	0	12.124	0		59.6	16.5	24	0	0	0	0	0	0
			Spices, other	0.4	4	0.12	0.16	12.124	4.8496		59.6	16.5	24	2.89036	0.800184	1.1639	2.89036	0.0320074	0.00390572
			Infant food	0.18	2	0.07	0.01	2.781	0.50058		24.6	56.4	19	0.123143	0.282327	0.0951102	0.123143	0.0112931	0.000319162
			Miscellaneous	0.97	1	0.03	0.01	6.84227	6.637		59.6	16.5	24	3.95565	1.09511	1.59288	3.95565	0.0438042	0.00534524
Costa Rica	Grain products (non-rice)		Wheat	38.26	300	7.74	1.08	1.4	53.564	73.1248	57.9	1.8	40.3	31.0136	0.964152	21.5863	31.0136	0.0385661	0.0724372	44.3391	0.0542755	0.09207	5048000	3.88445e+09	2.03761e+08	8.31907e+06
			Barley	2.4	24	0.86	0.12	1.313	3.1512		54.569	1.91155	43.5195	1.71958	0.0602369	1.37139	1.71958	0.00240947	0.00460197
			Maize	14.68	138	3.59	1.64	0.988	14.5038		71.9	2.05597	26.1	10.4283	0.298195	3.7855	10.4283	0.0119278	0.012703
			Millet	0	0	0	0	1.313	0		61.8	1.8	36.4	0	0	0	0	0	0
			Rye	0	0	0	0	1.4	0		73.3007	1.65211	25.0472	0	0	0	0	0	0
			Oats	1.21	13	0.53	0.21	1.575	1.90575		61.8	1.8	36.4	1.17775	0.0343035	0.693693	1.17775	0.00137214	0.00232783
			Sorghum	0	0	0	0	1.313	0		61.8	1.8	36.4	0	0	0	0	0	0
			Cereals, other	0	0	0	0	1.313	0		61.8	1.8	36.4	0	0	0	0	0	0
	Rice		Rice (milled equivalent)	66.18	417	8.28	0.77	3.839	254.065	254.065	22.2	71.8	6	56.4024	182.419	15.2439	56.4024	7.29675	0.051154	56.4024	7.29675	0.051154
	Fruit		Oranges, mandarines	12.54	7	0.13	0.02	0.317	3.97518	81.4506	56.9055	1.22138	41.8731	2.2621	0.048552	1.66453	2.2621	0.00194208	0.00558568	55.4079	0.0761601	0.0810024
			Lemons, limes	7.09	3	0.12	0.04	0.317	2.24753		56.3759	0	43.6241	1.26707	0	0.980464	1.26707	0	0.00329015
			Grapefruit	4.12	2	0.03	0.01	0.317	1.30604		68.8513	2.47131	28.6774	0.899225	0.0322762	0.374539	0.899225	0.00129105	0.00125684
			Citrus, other	0.04	0	0	0	0.317	0.01268		68.8513	2.47131	28.6774	0.00873034	0.000313362	0.0036363	0.00873034	1.25345e-05	1.22023e-05
			Bananas	0.47	1	0.01	0	0.678	0.31866		79.4125	3.10136	17.4861	0.253056	0.00988278	0.0557213	0.253056	0.000395311	0.000186984
			Plantains	15.92	37	0.31	0.09	0.6632	10.5581		68.8513	2.47131	28.6774	7.26942	0.260924	3.0278	7.26942	0.010437	0.0101604
			Apples	3.87	5	0.01	0.03	0.357	1.38159		72.4477	2.06109	25.4912	1.00093	0.0284759	0.352183	1.00093	0.00113903	0.00118182
			Pineapples	40.7	43	0.24	0.08	0.6632	26.9922		68.8513	2.47131	28.6774	18.5845	0.667061	7.74068	18.5845	0.0266824	0.0259754
			Dates	0.01	0	0	0	0.6632	0.006632		68.8513	2.47131	28.6774	0.00456622	0.000163897	0.00190189	0.00456622	6.55588e-06	6.38217e-06
			Grapes (excluding wine)	2.17	3	0.03	0.02	1.214	2.63438		68.8513	2.47131	28.6774	1.8138	0.0651036	0.755472	1.8138	0.00260414	0.00253514
			Fruits, other	42.69	45	0.54	1.09	0.75	32.0175		68.8513	2.47131	28.6774	22.0445	0.79125	9.18179	22.0445	0.03165	0.0308114
	Vegetables		Cassava	2.91	9	0.1	0.02	0.987	2.87217	74.8244	83.6105	0.362596	16.0269	2.40143	0.0104144	0.460321	2.40143	0.000416575	0.0015447	48.5864	0.0985106	0.0797827
			Potatoes	15.26	31	0.73	0.06	0.37	5.6462		59.711	1.6649	38.6241	3.3714	0.0940037	2.1808	3.3714	0.00376015	0.00731811
			Sweet potatoes	0.02	0	0	0	0.365	0.0073		65.672	2.57696	31.751	0.00479406	0.000188118	0.00231782	0.00479406	7.52473e-06	7.77794e-06
			Yams	1.66	5	0.06	0.01	0.365	0.6059		65.672	2.57696	31.751	0.397907	0.0156138	0.192379	0.397907	0.000624553	0.000645569
			Roots, other	3.3	9	0.15	0.02	0.365	1.2045		65.672	2.57696	31.751	0.791019	0.0310395	0.382441	0.791019	0.00124158	0.00128336
			Tomatoes	13.8	20	0.85	0.22	1.427	19.6926		53.5199	4.20609	42.274	10.5395	0.828288	8.32484	10.5395	0.0331315	0.0279357
			Onions	7.01	8	0.25	0.04	0.395	2.76895		71.3251	1.22109	27.4538	1.97496	0.0338114	0.760183	1.97496	0.00135246	0.00255095
			Vegetables, other	37.37	29	1.01	0.23	0.455	17.0034		65.672	2.57696	31.751	11.1664	0.43817	5.39874	11.1664	0.0175268	0.0181166
			Aquatic plants	0	0	0	0	0	0		65.672	2.57696	31.751	0	0	0	0	0	0
			Beans	10.54	97	6.35	0.46	1.61	16.9694		75.1226	5.04344	19.834	12.7478	0.855842	3.36571	12.7478	0.0342337	0.0112943
			Peas	0.06	1	0.04	0	0.896	0.05376		66.4257	5.15877	28.4155	0.0357105	0.00277336	0.0152762	0.0357105	0.000110934	5.12623e-05
			Pulses, other	0.43	4	0.25	0.04	1.61	0.6923		65.672	2.57696	31.751	0.454647	0.0178403	0.219812	0.454647	0.000713613	0.000737625
			Nuts	0.56	8	0.23	0.77	0.278	0.15568		62.5618	3.79852	33.6397	0.0973963	0.00591353	0.0523702	0.0973963	0.000236541	0.000175739
			Soybeans	2.13	19	2.15	1.01	1.8925	4.03102		63.3478	1.20151	35.4507	2.55357	0.048433	1.42903	2.55357	0.00193732	0.00479539
			Groundnuts (shelled equivalents)	1.25	13	0.63	1.1	2.497	3.12125		65.672	2.57696	31.751	2.04979	0.0804335	0.991029	2.04979	0.00321734	0.0033256
	Meat	Ruminant	Bovine meat	12.76	43	5.12	2.35	42.8	546.128	546.616	10.5	73	16.5	57.3434	398.673	90.1111	57.3434	15.9469	0.302386	57.4426	15.9579	0.302775
			Mutton and goat meat	0.02	0	0.01	0.01	24.415	0.4883		20.3	56	23.7	0.0991249	0.273448	0.115727	0.0991249	0.0109379	0.000388346
		Non-ruminant	Pig meat	12.42	43	3.14	3.29	7.282	90.4424	296.439	47.5051	28.439	24.0559	42.9647	25.721	21.7567	42.9647	1.02884	0.0730092	152.08	1.77038	0.335904
			Poultry meat	26.97	93	8.05	6.48	6.092	164.301		53.86	5.83151	40.3085	88.4926	9.58125	66.2274	88.4926	0.38325	0.222239
			Meat, other	0	0	0	0	6.687	0		49.4604	21.4829	29.0567	0	0	0	0	0	0
			Offals, edible	1.55	5	0.78	0.12	26.9	41.695		49.4604	21.4829	29.0567	20.6225	8.95729	12.1152	20.6225	0.358292	0.040655
	Seafood		Freshwater fish	6.68	10	1.6	0.36	4.005	26.7534	54.0627	49.4604	21.4829	29.0567	13.2323	5.7474	7.77365	13.2323	0.229896	0.0260861	62.0657	0.370554	0.031834
			Demersal fish	0.57	1	0.13	0.01	4.005	2.28285		78.6427	5.32556	16.0317	1.7953	0.121575	0.36598	1.7953	0.00486298	0.00122812
			Pelagic fish	8.13	28	3.21	1.55	4.005	32.5607		91.6865	7.21239	1.10113	29.8537	2.3484	0.358536	29.8537	0.093936	0.00120314
			Marine fish, other	0.64	1	0.19	0.04	4.005	2.5632		89.095	4.66193	6.24304	2.28368	0.119495	0.160022	2.28368	0.00477979	0.000536985
			Crustaceans	1.26	2	0.4	0.02	7.3405	9.24903		89.095	4.66193	6.24304	8.24043	0.431183	0.577421	8.24043	0.0172473	0.00193765
			Cephalopods	0.35	1	0.14	0.01	7.3405	2.56917		89.095	4.66193	6.24304	2.28901	0.119773	0.160395	2.28901	0.00479093	0.000538237
			Molluscs, other	0.65	1	0.08	0.01	7.3405	4.77133		90.3737	7.81574	1.81055	4.31202	0.372914	0.086387	4.31202	0.0149166	0.000289889
			Aquatic animals, others	0.01	0	0	0	6.6476	0.066476		89.095	4.66193	6.24304	0.0592268	0.00309907	0.00415012	0.0592268	0.000123963	1.39266e-05
	Dairy		Cream	0	0	0	0	2.781	0	554.089	24.1	56.7	19.2	0	0	0	0	0	0	123.643	12.9845	0.355153
			Butter, ghee	1.61	32	0.04	3.58	2.781	4.47741		24.1	56.7	19.2	1.07906	2.53869	0.859663	1.07906	0.101548	0.00288477
			Milk (excluding butter) *includes cheese	152.67	310	19.93	15.33	3.6	549.612		22.3	58.6	19.1	122.563	322.073	104.976	122.563	12.8829	0.352268
	Eggs		Eggs	11.23	40	3.07	2.67	4.507	50.6136	50.6136	41.5	6.5	52	21.0046	3.28988	26.3191	21.0046	0.131595	0.0883191	21.0046	0.131595	0.0883191
	Oils		Oilcrops, other	0	0	0	0	1.313	0	123.668	61.4	13	25.6	0	0	0	0	0	0	76.5527	0.627239	0.104971
			Soybean oil	9.77	237	0	26.76	6.117	59.7631		61.4	13	25.6	36.6945	7.7692	15.2994	36.6945	0.310768	0.0513401
			Groundnut oil	0	0	0	0	5.752	0		61.4	13	25.6	0	0	0	0	0	0
			Sunflowerseed oil	0.93	22	0	2.54	3.607	3.35451		61.4	13	25.6	2.05967	0.436086	0.858755	2.05967	0.0174435	0.00288173
			Rape and mustard oil	0	0	0	0	3.828	0		65.1	3.3	31.6	0	0	0	0	0	0
			Cottonseed oil	0	0	0	0.01	5.752	0		61.4	13	25.6	0	0	0	0	0	0
			Palmkernel oil	0	0	0	0	5.752	0		56.142	28.9894	14.8685	0	0	0	0	0	0
			Sesame seed oil	0.07	2	0	0.18	5.752	0.40264		61.4	13	25.6	0.247221	0.0523432	0.103076	0.247221	0.00209373	0.000345892
			Palm oil	6.27	152	0	17.19	7.605	47.6833		61.4923	12.9177	25.59	29.3216	6.15959	12.2022	29.3216	0.246384	0.0409469
			Coconut oil	0.02	0	0	0.05	5.752	0.11504		61.4	13	25.6	0.0706346	0.0149552	0.0294502	0.0706346	0.000598208	9.88263e-05
			Olive Oil	0.32	8	0	0.88	5.944	1.90208		89.1721	3.20831	7.61958	1.69612	0.0610246	0.144931	1.69612	0.00244098	0.000486344
			Rice bran oil	0	0	0	0	5.752	0		61.4	13	25.6	0	0	0	0	0	0
			Maize germ oil	0.12	3	0	0.34	5.752	0.69024		61.4	13	25.6	0.423807	0.0897312	0.176701	0.423807	0.00358925	0.000592958
[truncated: 2,214 more rows]

## Sheet: N Africa, W and Central Asia
Country	Food Group		Food Item	Consumption (kg food/capita/yr)	Caloric Consumption (kcal/capita/yr)	Protein Consumption (g/capita/day)	Fat Consumption (g/capita/day)	Greenhouse Gas Emissions (kg CO2e/kg)	Consumption Emissions (kg CO2e/capita/yr)	Food Group Consumption Emissions (kg CO2e/capita/yr)	Percent by Component Gas			Greenhouse Gas Emissions (kg CO2e/capita/yr)			Greenhouse Gas Emissions (kg gas/capita/yr)			Food Group Emission (kg gas/capita/yr)			Population (Year 2019)	Sum of Dietary Emissions (kg gas/yr)
[truncated: 2,186 more rows]

[truncated: 3 more sheets: South and Southeast Asia, Sub-Saharan Africa, USA, Canada, Oceania]
